# Supplementary material for: Role of Cnot6l in maternal mRNA turnover
Source: Life Sci Alliance. 2018 Jul 16;1(4):e201800084. doi: 10.26508/lsa.201800084 (PMC6238536; doi:10.26508/lsa.201800084)
Supplement: Supplementary file 1 [file LSA-2018-00084_TableS1.xlsx]

## Sheet: 2018 CNOT6L Table S1 - GV diffe
ENSEMBL gene ID	gene name	gene description	coordinates mm10	MII KO FPKM	MII WT FPKM	log2FoldChange (DESeq2)	adjusted p-value (DESeq2)	mean of normalized counts (DESeq2)
ENSMUSG00000024776	Stambpl1	STAM binding protein like 1 [Source:MGI Symbol;Acc:MGI:1923880]	chr19:34192229-34240333|+	0.722606	0.0367093	2.89708	1.28e-05	32.767
ENSMUSG00000051627	Hist1h1e	histone cluster 1, H1e [Source:MGI Symbol;Acc:MGI:1931527]	chr13:23621755-23622502|-	20.5246	5.44047	1.69615	0.000264	187.295
ENSMUSG00000024924	Vldlr	very low density lipoprotein receptor [Source:MGI Symbol;Acc:MGI:98935]	chr19:27216484-27254231|+	0.354335	0.112578	1.42537	0.0291598	29.6124
ENSMUSG00000051455	Meioc	meiosis specific with coiled-coil domain [Source:MGI Symbol;Acc:MGI:2686410]	chr11:102663716-102682237|+	0.663025	0.246961	1.22062	0.0837735	51.1802
ENSMUSG00000029648	Flt1	FMS-like tyrosine kinase 1 [Source:MGI Symbol;Acc:MGI:95558]	chr5:147561604-147726011|-	2.05313	1.10105	0.844068	0.0030689	372.813
ENSMUSG00000096255	Dynlt1b	dynein light chain Tctex-type 1B [Source:MGI Symbol;Acc:MGI:98643]	chr17:6430112-6436293|+	151.94	92.6355	0.684504	0.00865094	727.805
ENSMUSG00000021636	Marveld2	MARVEL (membrane-associating) domain containing 2 [Source:MGI Symbol;Acc:MGI:2446166]	chr13:100595957-100616971|-	11.3171	7.06832	0.638647	0.0965664	422.055
ENSMUSG00000000579	Dynlt1c	dynein light chain Tctex-type 1C [Source:MGI Symbol;Acc:MGI:3807476]	chr17:6601671-6609774|+	24.2825	16.4217	0.540536	0.0141947	629.359
ENSMUSG00000012428	Steap4	STEAP family member 4 [Source:MGI Symbol;Acc:MGI:1923560]	chr5:7960457-7982213|+	12.4747	8.45288	0.529614	0.0767244	338.902
ENSMUSG00000027775	Mfsd1	major facilitator superfamily domain containing 1 [Source:MGI Symbol;Acc:MGI:1914118]	chr3:67582741-67604237|+	28.3773	19.6043	0.505361	0.00166658	989.106
ENSMUSG00000019944	Rhobtb1	Rho-related BTB domain containing 1 [Source:MGI Symbol;Acc:MGI:1916538]	chr10:69151434-69291791|+	7.24177	5.17646	0.45485	0.0372021	555.328
ENSMUSG00000074194	Zfp791	zinc finger protein 791 [Source:MGI Symbol;Acc:MGI:3648473]	chr8:85108553-85123095|-	32.0445	24.2549	0.373046	0.0244434	1280.07
ENSMUSG00000028719	Cmpk1	cytidine monophosphate (UMP-CMP) kinase 1 [Source:MGI Symbol;Acc:MGI:1913838]	chr4:114959336-114987241|-	18.2456	14.0151	0.353985	0.0768506	2004.91
ENSMUSG00000047045	Tmem164	transmembrane protein 164 [Source:MGI Symbol;Acc:MGI:2148020]	chrX:142681406-142843494|+	14.7616	11.6343	0.317995	0.0481602	1184.13
ENSMUSG00000070733	Fryl	FRY like transcription coactivator [Source:MGI Symbol;Acc:MGI:1919563]	chr5:73019987-73256619|-	18.4003	21.5255	-0.246315	0.0768506	5395.51
ENSMUSG00000073294	AU022751	expressed sequence AU022751 [Source:MGI Symbol;Acc:MGI:2147968]	chrX:6081219-6083419|-	421.581	494.201	-0.250672	0.0997812	21952.2
ENSMUSG00000021282	Eif5	eukaryotic translation initiation factor 5 [Source:MGI Symbol;Acc:MGI:95309]	chr12:111538016-111546752|+	45.8109	55.5032	-0.296481	8.41e-05	5108.24
ENSMUSG00000053199	Arhgap20	Rho GTPase activating protein 20 [Source:MGI Symbol;Acc:MGI:2445175]	chr9:51765337-51853856|+	3.01934	3.9581	-0.408375	0.0481602	935.507
ENSMUSG00000048502	Duxbl1	double homeobox B-like 1 [Source:MGI Symbol;Acc:MGI:1916048]	chr14:25978577-25990088|+	12.6698	18.7148	-0.578044	0.00448886	1602.73
ENSMUSG00000072675	Duxbl2	double homeobox B-like 2 [Source:MGI Symbol;Acc:MGI:3710620]	chr14:26118349-26129763|+	12.1831	19.9443	-0.721157	0.000815	1689.65
ENSMUSG00000072672	Duxbl3	double homeobox B-like 3 [Source:MGI Symbol;Acc:MGI:3710520]	chr14:26257962-26269436|+	11.4164	18.689	-0.721239	0.0008	1697.56
ENSMUSG00000050840	Cdh20	cadherin 20 [Source:MGI Symbol;Acc:MGI:1346069]	chr1:104768529-104995481|+	2.92152	5.24322	-0.832709	0.00641198	319.472
ENSMUSG00000098463	Cphx2	cytoplasmic polyadenylated homeobox 2 [Source:MGI Symbol;Acc:MGI:3780272]	chr14:26081516-26096127|+	54.4663	124.307	-1.15946	0.000487	2921.53
ENSMUSG00000095975	Cphx1	cytoplasmic polyadenylated homeobox 1 [Source:MGI Symbol;Acc:MGI:2145733]	chr14:25938304-25956356|+	54.1119	123.918	-1.16511	0.000385	3117.74
ENSMUSG00000094817	Cphx3	cytoplasmic polyadenylated homeobox 3 [Source:MGI Symbol;Acc:MGI:3711264]	chr14:26082297-26235744|+	63.6106	145.677	-1.16583	0.000385	3238.54
ENSMUSG00000034724	Cnot6l	CCR4-NOT transcription complex, subunit 6-like [Source:MGI Symbol;Acc:MGI:2443154]	chr5:96070333-96164171|-	0.450284	29.9333	-5.97989	0	4045.67
