# Supplementary material for: Role of Cnot6l in maternal mRNA turnover
Source: Life Sci Alliance. 2018 Jul 16;1(4):e201800084. doi: 10.26508/lsa.201800084 (PMC6238536; doi:10.26508/lsa.201800084)
Supplement: Supplementary file 2 [file LSA-2018-00084_TableS2.xlsx]

## Sheet: 2018 CNOT6L Table S2 - MII diff
ENSEMBL gene ID	gene name	gene description	coordinates mm10	MII KO FPKM	MII WT FPKM	log2FoldChange (DESeq2)	adjusted p-value (DESeq2)	mean of normalized counts (DESeq2)
ENSMUSG00000051615	Rap2a	RAS related protein 2a [Source:MGI Symbol;Acc:MGI:97855]	chr14:120478461-120507194|+	7.30055	0.163341	4.87373	4.09e-66	408.444
ENSMUSG00000024776	Stambpl1	STAM binding protein like 1 [Source:MGI Symbol;Acc:MGI:1923880]	chr19:34192229-34240333|+	0.519989	0.040565	2.43764	4.63e-05	32.767
ENSMUSG00000051627	Hist1h1e	histone cluster 1, H1e [Source:MGI Symbol;Acc:MGI:1931527]	chr13:23621755-23622502|-	27.5536	4.11351	2.41692	3.56e-11	187.295
ENSMUSG00000039960	Rhou	ras homolog family member U [Source:MGI Symbol;Acc:MGI:1916831]	chr8:123653929-123663884|+	0.818767	0.118721	2.16971	5.59e-06	41.414
ENSMUSG00000069874	Irgm2	immunity-related GTPase family M member 2 [Source:MGI Symbol;Acc:MGI:1926262]	chr11:58199618-58222782|+	2.13839	0.229646	2.04659	0.000632	95.1405
ENSMUSG00000051579	Tceal8	transcription elongation factor A (SII)-like 8 [Source:MGI Symbol;Acc:MGI:1913934]	chrX:136168984-136172342|-	1.07158	0.17254	1.86905	0.000809	46.6902
ENSMUSG00000042541	Sem1	SEM1, 26S proteasome complex subunit [Source:MGI Symbol;Acc:MGI:109238]	chr6:6557294-6578663|-	3.5561	0.941332	1.79681	4.93e-18	198.964
ENSMUSG00000022367	Has2	hyaluronan synthase 2 [Source:MGI Symbol;Acc:MGI:107821]	chr15:56665627-56694539|-	0.59507	0.115365	1.7707	0.00230676	28.9094
ENSMUSG00000067773	Defb41	defensin beta 41 [Source:MGI Symbol;Acc:MGI:1924923]	chr1:18250980-18265138|-	4.69151	1.09698	1.72692	0.000205	35.0063
ENSMUSG00000027840	Wnt2b	wingless-type MMTV integration site family, member 2B [Source:MGI Symbol;Acc:MGI:1261834]	chr3:104945272-104961921|-	0.615339	0.129092	1.71307	0.00230676	30.8862
ENSMUSG00000032518	Rpsa	ribosomal protein SA [Source:MGI Symbol;Acc:MGI:105381]	chr9:120127689-120132369|+	3.18781	0.818777	1.67478	4.17e-05	341.355
ENSMUSG00000026032	Ndufb3	NADH dehydrogenase (ubiquinone) 1 beta subcomplex 3 [Source:MGI Symbol;Acc:MGI:1913745]	chr1:58586384-58595964|+	10.7043	3.05743	1.63279	2.33e-08	158.909
ENSMUSG00000062624	Cyp2c67	cytochrome P450, family 2, subfamily c, polypeptide 67 [Source:MGI Symbol;Acc:MGI:3612288]	chr19:39608842-39649051|-	1.29383	0.314555	1.61311	0.00249888	25.8837
ENSMUSG00000002028	Kmt2a	lysine (K)-specific methyltransferase 2A [Source:MGI Symbol;Acc:MGI:96995]	chr9:44803355-44881296|-	0.339321	0.0929146	1.50489	0.00303477	91.5802
ENSMUSG00000095562	Gm21887	predicted gene, 21887 [Source:MGI Symbol;Acc:MGI:5434051]	chrX:170009659-170019281|+	5.58807	1.43918	1.48699	0.0116156	53.2079
ENSMUSG00000093847	Gm5039	predicted gene 5039 [Source:MGI Symbol;Acc:MGI:3648085]	chr12:88320122-88324026|-	1.43803	0.40926	1.46745	0.00341329	37.8131
ENSMUSG00000022053	Ebf2	early B cell factor 2 [Source:MGI Symbol;Acc:MGI:894332]	chr14:67233292-67430918|+	0.771791	0.235484	1.4576	0.000677	76.4682
ENSMUSG00000091625	Lsm5	LSM5 homolog, U6 small nuclear RNA and mRNA degradation associated [Source:MGI Symbol;Acc:MGI:1913623]	chr6:56701063-56704710|-	36.817	12.668	1.45579	1.8e-12	330.473
ENSMUSG00000030744	Rps3	ribosomal protein S3 [Source:MGI Symbol;Acc:MGI:1350917]	chr7:99477896-99483738|-	0.941294	0.305849	1.45436	8.52e-07	197.687
ENSMUSG00000040430	Pitpnc1	phosphatidylinositol transfer protein, cytoplasmic 1 [Source:MGI Symbol;Acc:MGI:1919045]	chr11:107207892-107470699|-	0.435519	0.123036	1.43713	0.0106574	32.6821
ENSMUSG00000073700	Klhl21	kelch-like 21 [Source:MGI Symbol;Acc:MGI:1919288]	chr4:152008803-152017680|+	6.04874	2.07609	1.41769	4.68e-06	260.518
ENSMUSG00000050967	Creg2	cellular repressor of E1A-stimulated genes 2 [Source:MGI Symbol;Acc:MGI:1928333]	chr1:39618406-39651474|-	0.636127	0.194361	1.37596	0.0117029	42.2971
ENSMUSG00000026109	Tmeff2	transmembrane protein with EGF-like and two follistatin-like domains 2 [Source:MGI Symbol;Acc:MGI:1861735]	chr1:50900647-51187270|+	1.02255	0.362578	1.36964	8.21e-06	73.8117
ENSMUSG00000072875	Gpr27	G protein-coupled receptor 27 [Source:MGI Symbol;Acc:MGI:1202299]	chr6:99692679-99695066|+	6.9655	2.52248	1.36438	6.45e-08	191.658
ENSMUSG00000092166	Gm7942	predicted gene 7942 [Source:MGI Symbol;Acc:MGI:3646599]	chr5:95106938-95111158|+	0.787696	0.184095	1.36138	0.0217091	61.6583
ENSMUSG00000031347	Cetn2	centrin 2 [Source:MGI Symbol;Acc:MGI:1347085]	chrX:72913532-72918411|-	9.98211	3.70375	1.34644	9.41e-14	354.922
ENSMUSG00000038260	Trpm4	transient receptor potential cation channel, subfamily M, member 4 [Source:MGI Symbol;Acc:MGI:1915917]	chr7:45302632-45333780|-	0.0566226	0.00694069	1.33435	0.030056	32.272
ENSMUSG00000038936	Sccpdh	saccharopine dehydrogenase (putative) [Source:MGI Symbol;Acc:MGI:1924486]	chr1:179668210-179687189|+	0.0750683	0.00699266	1.33237	0.0484322	27.1813
ENSMUSG00000052565	Hist1h1d	histone cluster 1, H1d [Source:MGI Symbol;Acc:MGI:107502]	chr13:23555087-23555830|+	4.2319	1.39279	1.33213	0.0102112	31.8869
ENSMUSG00000044533	Rps2	ribosomal protein S2 [Source:MGI Symbol;Acc:MGI:105110]	chr17:24718116-24721929|+	45.9989	17.6041	1.32312	1.78e-18	1468
ENSMUSG00000040213	Kyat3	kynurenine aminotransferase 3 [Source:MGI Symbol;Acc:MGI:2677849]	chr3:142701051-142746870|+	2.60766	0.942409	1.32272	0.000104	272.565
ENSMUSG00000061286	Exosc5	exosome component 5 [Source:MGI Symbol;Acc:MGI:107889]	chr7:25659164-25671368|+	0.330614	0.10787	1.32124	0.00800752	37.6692
ENSMUSG00000079641	Rpl39	ribosomal protein L39 [Source:MGI Symbol;Acc:MGI:1914498]	chrX:37082520-37085402|-	4.31722	1.48832	1.31554	0.000658	803.32
ENSMUSG00000027377	Mall	mal, T cell differentiation protein-like [Source:MGI Symbol;Acc:MGI:2385152]	chr2:127704386-127729932|-	2.62812	0.915337	1.30849	0.00275981	58.9784
ENSMUSG00000021636	Marveld2	MARVEL (membrane-associating) domain containing 2 [Source:MGI Symbol;Acc:MGI:2446166]	chr13:100595957-100616971|-	10.8097	4.13054	1.30708	7.66e-11	422.055
ENSMUSG00000063856	Gpx1	glutathione peroxidase 1 [Source:MGI Symbol;Acc:MGI:104887]	chr9:108338903-108340343|+	6.13713	2.268	1.29315	4.42e-05	147.521
ENSMUSG00000049657	Zbtb5	zinc finger and BTB domain containing 5 [Source:MGI Symbol;Acc:MGI:1924601]	chr4:44991242-45012412|-	0.321607	0.102939	1.27617	0.0178647	34.0709
ENSMUSG00000078670	Fam174b	family with sequence similarity 174, member B [Source:MGI Symbol;Acc:MGI:3698178]	chr7:73740302-73776919|+	1.5228	0.514918	1.27356	0.0167799	63.5179
ENSMUSG00000020630	Rnaseh1	ribonuclease H1 [Source:MGI Symbol;Acc:MGI:1335073]	chr12:28649602-28659589|+	15.0535	5.98511	1.27056	1.08e-19	427.077
ENSMUSG00000021318	Gli3	GLI-Kruppel family member GLI3 [Source:MGI Symbol;Acc:MGI:95729]	chr13:15463235-15730026|+	30.8982	12.0877	1.25048	7e-06	3081.29
ENSMUSG00000024552	Slc14a2	solute carrier family 14 (urea transporter), member 2 [Source:MGI Symbol;Acc:MGI:1351653]	chr18:78146940-78209094|-	1.40159	0.518765	1.24373	0.00603451	47.4699
ENSMUSG00000051455	Meioc	meiosis specific with coiled-coil domain [Source:MGI Symbol;Acc:MGI:2686410]	chr11:102663716-102682237|+	0.957162	0.357874	1.23991	0.00393772	51.1802
ENSMUSG00000055675	Kbtbd11	kelch repeat and BTB (POZ) domain containing 11 [Source:MGI Symbol;Acc:MGI:1922151]	chr8:15011025-15033333|+	0.707966	0.265775	1.22214	0.00289918	86.4517
ENSMUSG00000050534	Htr5b	5-hydroxytryptamine (serotonin) receptor 5B [Source:MGI Symbol;Acc:MGI:96284]	chr1:121509842-121528465|-	2.14587	0.806724	1.21538	0.00659294	48.3433
ENSMUSG00000021846	Peli2	pellino 2 [Source:MGI Symbol;Acc:MGI:1891445]	chr14:48120869-48260883|+	6.92715	2.48185	1.21431	0.0261079	459.742
ENSMUSG00000010760	Phlda2	pleckstrin homology like domain, family A, member 2 [Source:MGI Symbol;Acc:MGI:1202307]	chr7:143501545-143503150|-	7.91282	3.25802	1.19052	1.8e-06	105.707
ENSMUSG00000028643	Svbp	small vasohibin binding protein [Source:MGI Symbol;Acc:MGI:1916466]	chr4:119195306-119201298|+	1.54523	0.574176	1.18803	0.0366557	27.09
ENSMUSG00000021207	Akr1c21	aldo-keto reductase family 1, member C21 [Source:MGI Symbol;Acc:MGI:1924587]	chr13:4574075-4586541|+	1.70914	0.630731	1.18652	0.0242671	42.1292
ENSMUSG00000036181	Hist1h1c	histone cluster 1, H1c [Source:MGI Symbol;Acc:MGI:1931526]	chr13:23738808-23740367|+	1.05804	0.364889	1.18504	0.0301508	25.9823
ENSMUSG00000038374	Rbm8a	RNA binding motif protein 8a [Source:MGI Symbol;Acc:MGI:1913129]	chr3:96629933-96633791|+	5.20733	2.19357	1.17492	1.8e-12	299.226
ENSMUSG00000032724	Abtb2	ankyrin repeat and BTB (POZ) domain containing 2 [Source:MGI Symbol;Acc:MGI:2139365]	chr2:103566310-103718423|+	2.02665	0.843074	1.16837	1.49e-05	143.484
ENSMUSG00000044150	A830080D01Rik	RIKEN cDNA A830080D01 gene [Source:MGI Symbol;Acc:MGI:2685992]	chrX:159526688-159593081|+	0.484183	0.174246	1.16267	0.0295929	49.4653
ENSMUSG00000022283	Pabpc1	poly(A) binding protein, cytoplasmic 1 [Source:MGI Symbol;Acc:MGI:1349722]	chr15:36595661-36608973|-	6.66534	2.83742	1.16009	2.78e-08	515.001
ENSMUSG00000036611	Eepd1	endonuclease/exonuclease/phosphatase family domain containing 1 [Source:MGI Symbol;Acc:MGI:1914734]	chr9:25481547-25604110|+	7.52606	3.19282	1.15043	1.25e-05	239.349
ENSMUSG00000095427	Rps2-ps6	ribosomal protein S2, pseudogene 6 [Source:MGI Symbol;Acc:MGI:3644876]	chr14:76236688-76237353|-	8.24893	3.45509	1.1369	8.92e-05	98.191
ENSMUSG00000073158	9030624G23Rik	RIKEN cDNA 9030624G23 gene [Source:MGI Symbol;Acc:MGI:1914058]	chr12:24043202-24097246|-	1.4072	0.564762	1.1336	0.0191089	37.0406
ENSMUSG00000053536	Cstf2t	cleavage stimulation factor, 3' pre-RNA subunit 2, tau [Source:MGI Symbol;Acc:MGI:1932622]	chr19:31082841-31086590|+	4.94013	2.1684	1.12384	2.38e-11	265.297
ENSMUSG00000022674	Ube2v2	ubiquitin-conjugating enzyme E2 variant 2 [Source:MGI Symbol;Acc:MGI:1917870]	chr16:15552677-15594524|-	1.54283	0.654694	1.12314	0.000177	93.3411
ENSMUSG00000095909	Gm10324	predicted gene 10324 [Source:MGI Symbol;Acc:MGI:3642406]	chr13:66119547-66122836|+	47.5216	18.8185	1.11964	0.0306707	1085.65
ENSMUSG00000031533	Mrps31	mitochondrial ribosomal protein S31 [Source:MGI Symbol;Acc:MGI:1913153]	chr8:22411361-22429665|+	20.6207	9.0977	1.11736	1.02e-10	677.613
ENSMUSG00000091411	Gm5916	predicted gene 5916 [Source:MGI Symbol;Acc:MGI:3643162]	chr9:36119934-36128779|-	2.12456	0.79555	1.11581	0.0823781	26.0618
ENSMUSG00000022476	Polr3h	polymerase (RNA) III (DNA directed) polypeptide H [Source:MGI Symbol;Acc:MGI:1926179]	chr15:81915030-81926213|-	0.598882	0.217366	1.11425	0.0182613	51.4846
ENSMUSG00000029817	Tra2a	transformer 2 alpha homolog (Drosophila) [Source:MGI Symbol;Acc:MGI:1933972]	chr6:49243924-49264033|-	1.94952	0.861727	1.10149	2.89e-06	207.075
ENSMUSG00000030917	Tmem159	transmembrane protein 159 [Source:MGI Symbol;Acc:MGI:1925752]	chr7:120102353-120120992|+	3.08383	1.32171	1.10091	0.00166115	75.5519
ENSMUSG00000007739	Cct4	chaperonin containing Tcp1, subunit 4 (delta) [Source:MGI Symbol;Acc:MGI:104689]	chr11:22990519-23003780|+	6.22783	2.75676	1.09971	5.36e-07	393.429
ENSMUSG00000074220	Zfp382	zinc finger protein 382 [Source:MGI Symbol;Acc:MGI:3588204]	chr7:30121942-30134950|+	1.3895	0.558066	1.09051	0.0370636	40.7831
ENSMUSG00000018821	Avpi1	arginine vasopressin-induced 1 [Source:MGI Symbol;Acc:MGI:1916784]	chr19:42123273-42129059|-	3.71747	1.61777	1.08004	0.000291	132.54
ENSMUSG00000030450	Oca2	oculocutaneous albinism II [Source:MGI Symbol;Acc:MGI:97454]	chr7:56239760-56536518|+	0.676115	0.270716	1.07852	0.0194212	72.6484
ENSMUSG00000018126	Baiap2l2	BAI1-associated protein 2-like 2 [Source:MGI Symbol;Acc:MGI:2652819]	chr15:79258195-79285537|-	1.33493	0.576106	1.07407	0.0125457	38.8387
ENSMUSG00000023971	Rrp36	ribosomal RNA processing 36 homolog (S. cerevisiae) [Source:MGI Symbol;Acc:MGI:2385053]	chr17:46667458-46674255|-	2.70072	1.15321	1.07074	0.0151966	48.923
ENSMUSG00000027782	Kpna4	karyopherin (importin) alpha 4 [Source:MGI Symbol;Acc:MGI:1100848]	chr3:69067149-69127113|-	0.106675	0.0332507	1.06566	0.0557566	45.3273
ENSMUSG00000024924	Vldlr	very low density lipoprotein receptor [Source:MGI Symbol;Acc:MGI:98935]	chr19:27216484-27254231|+	0.226849	0.0939919	1.06332	0.0452098	29.6124
ENSMUSG00000021539	Lect2	leukocyte cell-derived chemotaxin 2 [Source:MGI Symbol;Acc:MGI:1278342]	chr13:56542460-56548538|-	1.77272	0.668267	1.0562	0.0819191	28.0107
ENSMUSG00000025025	Mxi1	MAX interactor 1, dimerization protein [Source:MGI Symbol;Acc:MGI:97245]	chr19:53310506-53375810|+	0.52946	0.229803	1.05189	0.0122244	46.5326
ENSMUSG00000038495	Otud7b	OTU domain containing 7B [Source:MGI Symbol;Acc:MGI:2654703]	chr3:96104527-96161129|+	2.87922	1.32107	1.04218	0.000142	349.759
ENSMUSG00000043460	Elfn2	leucine rich repeat and fibronectin type III, extracellular 2 [Source:MGI Symbol;Acc:MGI:3608416]	chr15:78670022-78718113|-	0.625663	0.253823	1.03487	0.0876116	34.8336
ENSMUSG00000017561	Crlf3	cytokine receptor-like factor 3 [Source:MGI Symbol;Acc:MGI:1860086]	chr11:80046493-80080991|-	5.04333	2.34553	1.03481	1.32e-06	257.098
ENSMUSG00000030751	Psma1	proteasome (prosome, macropain) subunit, alpha type 1 [Source:MGI Symbol;Acc:MGI:1347005]	chr7:114264606-114276118|-	15.4843	7.24671	1.03377	2.46e-09	598.779
ENSMUSG00000054364	Rhob	ras homolog family member B [Source:MGI Symbol;Acc:MGI:107949]	chr12:8497661-8500009|-	4.45371	2.0138	1.03209	0.0032301	121.221
ENSMUSG00000028836	Slc30a2	solute carrier family 30 (zinc transporter), member 2 [Source:MGI Symbol;Acc:MGI:106637]	chr4:134343181-134354484|+	1.30201	0.56505	1.03114	0.0227414	72.537
ENSMUSG00000047712	Ust	uronyl-2-sulfotransferase [Source:MGI Symbol;Acc:MGI:2442406]	chr10:8204756-8518825|-	5.55964	2.55887	1.02879	0.000375	317.877
ENSMUSG00000047613	A430005L14Rik	RIKEN cDNA A430005L14 gene [Source:MGI Symbol;Acc:MGI:2140680]	chr4:153957237-153961925|+	3.85926	1.7633	1.02793	0.000966	104.88
ENSMUSG00000024817	Uhrf2	ubiquitin-like, containing PHD and RING finger domains 2 [Source:MGI Symbol;Acc:MGI:1923718]	chr19:30030513-30093722|+	0.335214	0.139735	1.02733	0.0406857	57.1677
ENSMUSG00000025194	Abcc2	ATP-binding cassette, sub-family C (CFTR/MRP), member 2 [Source:MGI Symbol;Acc:MGI:1352447]	chr19:43782192-43840740|+	0.341365	0.144329	1.02398	0.0707954	35.403
ENSMUSG00000063063	Ctnna2	catenin (cadherin associated protein), alpha 2 [Source:MGI Symbol;Acc:MGI:88275]	chr6:76881637-77979699|-	0.755836	0.339826	1.02219	0.00583591	70.9446
ENSMUSG00000096768	Erdr1	erythroid differentiation regulator 1 [Source:MGI Symbol;Acc:MGI:2384747]	chrY:90784738-90816464|+	10.7265	4.48433	1.0221	0.0760813	184.544
ENSMUSG00000051185	Fam174a	family with sequence similarity 174, member A [Source:MGI Symbol;Acc:MGI:1914948]	chr1:95313623-95335284|+	0.911632	0.405554	1.01895	0.0279469	52.307
ENSMUSG00000038143	Stox2	storkhead box 2 [Source:MGI Symbol;Acc:MGI:1918319]	chr8:47180048-47446362|-	0.791932	0.357152	1.01189	0.0130495	238.368
ENSMUSG00000025940	Tmem70	transmembrane protein 70 [Source:MGI Symbol;Acc:MGI:1915068]	chr1:16665207-16678275|+	16.3729	7.82903	1.01023	1.67e-12	437.217
ENSMUSG00000090862	Rps13	ribosomal protein S13 [Source:MGI Symbol;Acc:MGI:1915302]	chr7:116331505-116334195|-	1.71659	0.779012	1.00884	0.000546	670.16
ENSMUSG00000024914	Drap1	Dr1 associated protein 1 (negative cofactor 2 alpha) [Source:MGI Symbol;Acc:MGI:1913806]	chr19:5422805-5424979|-	6.14955	2.88572	1.00675	5.32e-06	359.574
ENSMUSG00000024378	Stard4	StAR-related lipid transfer (START) domain containing 4 [Source:MGI Symbol;Acc:MGI:2156764]	chr18:33199355-33213862|-	5.03049	2.33737	1.00666	0.00164633	398.44
ENSMUSG00000032589	Bsn	bassoon [Source:MGI Symbol;Acc:MGI:1277955]	chr9:108096022-108190384|-	0.303938	0.13229	1.00665	0.0509822	62.5414
ENSMUSG00000026618	Iars2	isoleucine-tRNA synthetase 2, mitochondrial [Source:MGI Symbol;Acc:MGI:1919586]	chr1:185284726-185329396|-	0.305475	0.134728	1.00529	0.0325888	42.9696
ENSMUSG00000061787	Rps17	ribosomal protein S17 [Source:MGI Symbol;Acc:MGI:1309526]	chr7:81342732-81345254|-	1.83144	0.800576	1.00064	0.00303477	378.627
ENSMUSG00000026701	Prdx6	peroxiredoxin 6 [Source:MGI Symbol;Acc:MGI:894320]	chr1:161240112-161251219|-	0.790404	0.350703	1.00061	0.0144469	61.7444
ENSMUSG00000021832	Psmc6	proteasome (prosome, macropain) 26S subunit, ATPase, 6 [Source:MGI Symbol;Acc:MGI:1914339]	chr14:45329824-45349071|+	23.7094	11.4347	0.998237	4.93e-18	541.541
ENSMUSG00000024805	Pcgf5	polycomb group ring finger 5 [Source:MGI Symbol;Acc:MGI:1923505]	chr19:36379067-36456192|+	3.48475	1.60863	0.99812	0.00432313	72.3766
ENSMUSG00000055026	Gabrg3	gamma-aminobutyric acid (GABA) A receptor, subunit gamma 3 [Source:MGI Symbol;Acc:MGI:95624]	chr7:56716465-57387188|-	0.380709	0.175013	0.995754	0.0122756	60.0657
ENSMUSG00000078974	Sec61g	SEC61, gamma subunit [Source:MGI Symbol;Acc:MGI:1202066]	chr11:16500530-16508484|-	13.3343	6.39216	0.993996	8.52e-08	886.206
ENSMUSG00000092086	Gm6793	predicted gene 6793 [Source:MGI Symbol;Acc:MGI:3643578]	chr8:112013433-112015036|-	65.4513	31.86	0.992368	1.05e-21	1405.76
ENSMUSG00000073643	Wdfy1	WD repeat and FYVE domain containing 1 [Source:MGI Symbol;Acc:MGI:1916618]	chr1:79702262-79776143|-	1.02841	0.44974	0.983954	0.0688039	94.5164
ENSMUSG00000028410	Dnaja1	DnaJ heat shock protein family (Hsp40) member A1 [Source:MGI Symbol;Acc:MGI:1270129]	chr4:40722150-40737149|+	132.108	64.8189	0.982317	1.79e-30	15049.6
ENSMUSG00000040522	Tlr8	toll-like receptor 8 [Source:MGI Symbol;Acc:MGI:2176887]	chrX:167242696-167264329|-	2.49092	1.15094	0.977796	0.0234171	94.391
ENSMUSG00000017778	Cox7c	cytochrome c oxidase subunit VIIc [Source:MGI Symbol;Acc:MGI:103226]	chr13:86044816-86046904|-	12.1598	5.85337	0.975894	0.000187	570.904
ENSMUSG00000068749	Psma5	proteasome (prosome, macropain) subunit, alpha type 5 [Source:MGI Symbol;Acc:MGI:1347009]	chr3:108256926-108279974|+	31.8458	15.6156	0.974024	1.64e-14	754.36
ENSMUSG00000019579	Mydgf	myeloid derived growth factor [Source:MGI Symbol;Acc:MGI:2156020]	chr17:56175744-56183920|-	1.42471	0.635889	0.973942	0.0230158	65.2793
ENSMUSG00000075136	Olfr1164	olfactory receptor 1164 [Source:MGI Symbol;Acc:MGI:3030998]	chr2:88092855-88093966|-	2.11651	0.921385	0.972601	0.0891347	28.3871
ENSMUSG00000029757	Dync1i1	dynein cytoplasmic 1 intermediate chain 1 [Source:MGI Symbol;Acc:MGI:107743]	chr6:5725639-6028039|+	0.621132	0.283311	0.971657	0.0295929	42.5604
ENSMUSG00000034875	Nudt19	nudix (nucleoside diphosphate linked moiety X)-type motif 19 [Source:MGI Symbol;Acc:MGI:94203]	chr7:35547185-35556304|-	0.987743	0.445897	0.970987	0.0255354	43.4999
ENSMUSG00000057561	Eif1a	eukaryotic translation initiation factor 1A [Source:MGI Symbol;Acc:MGI:95298]	chr18:46597704-46610225|+	0.493629	0.202513	0.96901	0.0839489	40.4979
ENSMUSG00000007836	Hnrnpa0	heterogeneous nuclear ribonucleoprotein A0 [Source:MGI Symbol;Acc:MGI:1924384]	chr13:58125879-58128556|-	17.0778	8.43715	0.967954	1.19e-11	532.847
ENSMUSG00000055760	Gemin6	gem (nuclear organelle) associated protein 6 [Source:MGI Symbol;Acc:MGI:1914492]	chr17:80224441-80228497|+	7.46754	3.59179	0.964556	0.000194	212.541
ENSMUSG00000032515	Csrnp1	cysteine-serine-rich nuclear protein 1 [Source:MGI Symbol;Acc:MGI:2387989]	chr9:119971163-119984658|-	3.09607	1.48244	0.964179	0.00148413	133.244
ENSMUSG00000046718	Bst2	bone marrow stromal cell antigen 2 [Source:MGI Symbol;Acc:MGI:1916800]	chr8:71534255-71537456|-	6.69034	3.20483	0.962465	0.00179592	76.2389
ENSMUSG00000056515	Rab31	RAB31, member RAS oncogene family [Source:MGI Symbol;Acc:MGI:1914603]	chr17:65651726-65772752|-	2.56212	1.2354	0.961925	0.00347337	109.279
ENSMUSG00000021047	Nova1	neuro-oncological ventral antigen 1 [Source:MGI Symbol;Acc:MGI:104297]	chr12:46694517-46818929|-	0.313029	0.143084	0.957602	0.0649248	34.1583
ENSMUSG00000029708	Gcc1	golgi coiled coil 1 [Source:MGI Symbol;Acc:MGI:1921625]	chr6:28416091-28428390|-	1.65537	0.797022	0.950204	0.010935	124.194
ENSMUSG00000051379	Flrt3	fibronectin leucine rich transmembrane protein 3 [Source:MGI Symbol;Acc:MGI:1918686]	chr2:140650914-140671469|-	1.53545	0.740927	0.946233	0.0037603	101.865
ENSMUSG00000068604	Gm8225	predicted gene 8225 [Source:MGI Symbol;Acc:MGI:3643826]	chr17:26542760-26543715|+	5.46098	2.6331	0.938144	0.0079316	88.9956
ENSMUSG00000022244	Amacr	alpha-methylacyl-CoA racemase [Source:MGI Symbol;Acc:MGI:1098273]	chr15:10981756-10996624|+	2.06591	1.00849	0.938025	0.00684769	74.1042
ENSMUSG00000063412	Gm10131	predicted pseudogene 10131 [Source:MGI Symbol;Acc:MGI:3704308]	chr8:34111002-34111737|-	33.7382	16.8991	0.93638	2.27e-07	360.337
ENSMUSG00000024598	Fbn2	fibrillin 2 [Source:MGI Symbol;Acc:MGI:95490]	chr18:58008623-58209926|-	0.788608	0.384236	0.935723	0.00506618	117.575
ENSMUSG00000008348	Ubc	ubiquitin C [Source:MGI Symbol;Acc:MGI:98889]	chr5:125385965-125390202|-	385.244	190.642	0.932603	0.00173236	22672.3
ENSMUSG00000062006	Rpl34	ribosomal protein L34 [Source:MGI Symbol;Acc:MGI:1915686]	chr3:130726831-130730398|-	4.67881	2.32408	0.930795	1.12e-05	260.794
ENSMUSG00000060708	Bloc1s4	biogenesis of lysosomal organelles complex-1, subunit 4, cappuccino [Source:MGI Symbol;Acc:MGI:1929230]	chr5:36747378-36748650|-	2.30582	1.08531	0.926739	0.0420511	54.7174
ENSMUSG00000049624	Slc17a5	solute carrier family 17 (anion/sugar transporter), member 5 [Source:MGI Symbol;Acc:MGI:1924105]	chr9:78536488-78588041|-	1.82255	0.890707	0.922518	0.0102264	91.7514
ENSMUSG00000022978	Mis18a	MIS18 kinetochore protein A [Source:MGI Symbol;Acc:MGI:1913828]	chr16:90719312-90727404|-	24.5484	12.4845	0.921958	3.85e-10	702.28
ENSMUSG00000021553	Slc28a3	solute carrier family 28 (sodium-coupled nucleoside transporter), member 3 [Source:MGI Symbol;Acc:MGI:2137361]	chr13:58545399-58610877|-	0.612932	0.294658	0.918696	0.0420588	56.6548
ENSMUSG00000009555	Cdk9	cyclin-dependent kinase 9 (CDC2-related kinase) [Source:MGI Symbol;Acc:MGI:1328368]	chr2:32705784-32713076|-	1.29289	0.629345	0.91844	0.00526075	92.7602
ENSMUSG00000039774	Galnt12	UDP-N-acetyl-alpha-D-galactosamine:polypeptide N-acetylgalactosaminyltransferase 12 [Source:MGI Symbol;Acc:MGI:2444664]	chr4:47091909-47123070|+	4.26874	2.14779	0.915681	0.000799	138.814
ENSMUSG00000029599	Ddx54	DEAD (Asp-Glu-Ala-Asp) box polypeptide 54 [Source:MGI Symbol;Acc:MGI:1919240]	chr5:120612739-120628592|+	0.587133	0.285979	0.913665	0.0324028	46.7923
ENSMUSG00000090083	Rnf8	ring finger protein 8 [Source:MGI Symbol;Acc:MGI:1929069]	chr17:29614790-29641664|+	3.85166	1.95902	0.913136	3e-08	417.928
ENSMUSG00000061559	Wdr61	WD repeat domain 61 [Source:MGI Symbol;Acc:MGI:1917493]	chr9:54714735-54734519|-	0.88578	0.432381	0.91251	0.0338467	57.3332
ENSMUSG00000040952	Rps19	ribosomal protein S19 [Source:MGI Symbol;Acc:MGI:1333780]	chr7:24884371-24889806|+	0.29329	0.126575	0.912419	0.0430087	115.769
ENSMUSG00000021240	Abcd4	ATP-binding cassette, sub-family D (ALD), member 4 [Source:MGI Symbol;Acc:MGI:1349217]	chr12:84601464-84617413|-	1.20085	0.603361	0.909462	0.0016634	113.249
ENSMUSG00000056820	Tsnax	translin-associated factor X [Source:MGI Symbol;Acc:MGI:1855672]	chr8:125012997-125034192|+	21.277	10.9578	0.909154	5.28e-22	1394.55
ENSMUSG00000056427	Slit3	slit homolog 3 (Drosophila) [Source:MGI Symbol;Acc:MGI:1315202]	chr11:35121224-35708507|+	0.97422	0.481698	0.904478	0.0191095	73.0662
ENSMUSG00000015354	Pcolce2	procollagen C-endopeptidase enhancer 2 [Source:MGI Symbol;Acc:MGI:1923727]	chr9:95637601-95698096|+	1.52548	0.76007	0.901792	0.0130495	92.0246
ENSMUSG00000035594	Chrna5	cholinergic receptor, nicotinic, alpha polypeptide 5 [Source:MGI Symbol;Acc:MGI:87889]	chr9:54980880-55007779|+	1.16466	0.562713	0.894867	0.0837558	46.7092
ENSMUSG00000073684	Faap20	Fanconi anemia core complex associated protein 20 [Source:MGI Symbol;Acc:MGI:1914763]	chr4:155249802-155256687|+	2.85299	1.42415	0.890268	0.0397644	70.4793
ENSMUSG00000028140	Mrpl9	mitochondrial ribosomal protein L9 [Source:MGI Symbol;Acc:MGI:2137211]	chr3:94443318-94451130|+	9.8847	5.12917	0.889473	4.93e-08	495.595
ENSMUSG00000079480	Pin4	protein (peptidyl-prolyl cis/trans isomerase) NIMA-interacting, 4 (parvulin) [Source:MGI Symbol;Acc:MGI:1916963]	chrX:102119447-102127669|+	2.28718	1.058	0.885901	0.0581624	86.5003
ENSMUSG00000030851	Ldhc	lactate dehydrogenase C [Source:MGI Symbol;Acc:MGI:96764]	chr7:46861203-46878142|+	3.39632	1.71579	0.884321	0.015919	112.818
ENSMUSG00000021959	Lats2	large tumor suppressor 2 [Source:MGI Symbol;Acc:MGI:1354386]	chr14:57642077-57758388|-	0.643125	0.315402	0.884167	0.0540312	65.0678
ENSMUSG00000069867	Pabpn1l	poly(A)binding protein nuclear 1-like [Source:MGI Symbol;Acc:MGI:2685954]	chr8:122619471-122622739|-	33.264	17.1127	0.882154	0.000658	387.375
ENSMUSG00000030772	Dkk3	dickkopf WNT signaling pathway inhibitor 3 [Source:MGI Symbol;Acc:MGI:1354952]	chr7:112116017-112159057|-	2.2025	1.12077	0.877481	0.0246838	84.9879
ENSMUSG00000095074	Gm3139	predicted gene 3139 [Source:MGI Symbol;Acc:MGI:3781318]	chr5:94526287-94546423|+	7.19401	3.73317	0.877367	0.000758	341.972
ENSMUSG00000007892	Rplp1	ribosomal protein, large, P1 [Source:MGI Symbol;Acc:MGI:1927099]	chr9:61913284-61914542|-	26.1704	13.3099	0.877134	0.00500623	530.577
ENSMUSG00000008789	Ceacam5	carcinoembryonic antigen-related cell adhesion molecule 5 [Source:MGI Symbol;Acc:MGI:1920500]	chr7:17713238-17761132|+	1.47053	0.742251	0.874872	0.0253417	65.7978
ENSMUSG00000061983	Rps12	ribosomal protein S12 [Source:MGI Symbol;Acc:MGI:98105]	chr10:23785183-23787275|-	4.90416	2.53445	0.871714	2.26e-05	434.83
ENSMUSG00000025436	Atp23	ATP23 metallopeptidase and ATP synthase assembly factor homolog [Source:MGI Symbol;Acc:MGI:1916984]	chr10:126868427-126901355|-	1.1342	0.569667	0.869253	0.0359888	62.1757
ENSMUSG00000043969	Emx2	empty spiracles homeobox 2 [Source:MGI Symbol;Acc:MGI:95388]	chr19:59458372-59465357|+	2.44378	1.24018	0.868623	0.0235842	97.305
ENSMUSG00000036863	Syde2	synapse defective 1, Rho GTPase, homolog 2 (C. elegans) [Source:MGI Symbol;Acc:MGI:3036264]	chr3:145987870-146021720|+	0.580353	0.28403	0.862342	0.0999001	46.9849
ENSMUSG00000024875	Yif1a	Yip1 interacting factor homolog A (S. cerevisiae) [Source:MGI Symbol;Acc:MGI:1915340]	chr19:5088538-5092879|+	1.7731	0.882335	0.861602	0.0865041	45.1529
ENSMUSG00000066257	Olfr206	olfactory receptor 206 [Source:MGI Symbol;Acc:MGI:3030040]	chr16:59344675-59349246|-	2.86192	1.45517	0.858018	0.0356977	42.3293
ENSMUSG00000031754	Nudt21	nudix (nucleoside diphosphate linked moiety X)-type motif 21 [Source:MGI Symbol;Acc:MGI:1915469]	chr8:94015496-94037031|-	1.09348	0.56507	0.856557	0.0102772	119.133
ENSMUSG00000031377	Bmx	BMX non-receptor tyrosine kinase [Source:MGI Symbol;Acc:MGI:1101778]	chrX:164192842-164258193|-	2.00834	1.04621	0.847339	0.0235639	129.076
ENSMUSG00000061613	U2af1	U2 small nuclear ribonucleoprotein auxiliary factor (U2AF) 1 [Source:MGI Symbol;Acc:MGI:98884]	chr17:31647082-31658754|-	42.4584	22.8999	0.842256	6.1e-09	410.682
ENSMUSG00000035239	Neu3	neuraminidase 3 [Source:MGI Symbol;Acc:MGI:1355305]	chr7:99811439-99828417|-	1.01505	0.512692	0.840469	0.0769254	53.3456
ENSMUSG00000035109	Shc4	SHC (Src homology 2 domain containing) family, member 4 [Source:MGI Symbol;Acc:MGI:2655364]	chr2:125627447-125724148|-	0.916015	0.486179	0.836955	0.00506618	104.707
ENSMUSG00000030869	Ndufab1	NADH dehydrogenase (ubiquinone) 1, alpha/beta subcomplex, 1 [Source:MGI Symbol;Acc:MGI:1917566]	chr7:122085403-122101886|-	2.86147	1.54104	0.835925	1.3e-06	334.766
ENSMUSG00000037214	Thap1	THAP domain containing, apoptosis associated protein 1 [Source:MGI Symbol;Acc:MGI:1921004]	chr8:26158141-26164151|+	14.881	8.06789	0.832359	1.38e-12	643.467
ENSMUSG00000036667	Tcaf1	TRPM8 channel-associated factor 1 [Source:MGI Symbol;Acc:MGI:1914665]	chr6:42668002-42710088|-	0.320533	0.161628	0.830797	0.0977966	43.3169
ENSMUSG00000027712	Anxa5	annexin A5 [Source:MGI Symbol;Acc:MGI:106008]	chr3:36448923-36475894|-	4.03281	2.17232	0.827858	0.00194545	126.882
ENSMUSG00000051224	Tceanc	transcription elongation factor A (SII) N-terminal and central domain containing [Source:MGI Symbol;Acc:MGI:2685236]	chrX:166499812-166518567|-	4.00067	2.14338	0.827814	0.00246886	233.078
ENSMUSG00000090626	Tex9	testis expressed gene 9 [Source:MGI Symbol;Acc:MGI:1201610]	chr9:72450394-72492212|-	0.863568	0.446057	0.822518	0.0963264	92.2059
ENSMUSG00000039810	Zc3h10	zinc finger CCCH type containing 10 [Source:MGI Symbol;Acc:MGI:2143670]	chr10:128541963-128547774|-	0.756231	0.387444	0.821837	0.0982786	44.9036
ENSMUSG00000025894	Aasdhppt	aminoadipate-semialdehyde dehydrogenase-phosphopantetheinyl transferase [Source:MGI Symbol;Acc:MGI:1914868]	chr9:4294793-4309471|-	2.12319	1.1222	0.81979	0.0230158	89.918
ENSMUSG00000058620	Adra2b	adrenergic receptor, alpha 2b [Source:MGI Symbol;Acc:MGI:87935]	chr2:127363208-127367221|+	1.2164	0.640862	0.812364	0.0891347	46.7597
ENSMUSG00000034259	Exosc4	exosome component 4 [Source:MGI Symbol;Acc:MGI:1923576]	chr15:76327397-76330677|+	2.48749	1.3009	0.809769	0.0360508	100.805
ENSMUSG00000061482	Hist1h4d	histone cluster 1, H4d [Source:MGI Symbol;Acc:MGI:2448423]	chr13:23581598-23581990|+	26.9375	14.1754	0.809579	0.0740965	134.485
ENSMUSG00000048905	4930539E08Rik	RIKEN cDNA 4930539E08 gene [Source:MGI Symbol;Acc:MGI:1925441]	chr17:28896397-28915324|-	4.49751	2.47432	0.808917	3.58e-05	286.346
ENSMUSG00000025495	Ptdss2	phosphatidylserine synthase 2 [Source:MGI Symbol;Acc:MGI:1351664]	chr7:141122382-141157606|+	0.640869	0.34027	0.805248	0.0372801	70.8089
ENSMUSG00000040269	Mrps28	mitochondrial ribosomal protein S28 [Source:MGI Symbol;Acc:MGI:1913480]	chr3:8802146-8923918|-	4.04021	2.12197	0.797769	0.0553245	84.1813
ENSMUSG00000029121	Crmp1	collapsin response mediator protein 1 [Source:MGI Symbol;Acc:MGI:107793]	chr5:37241940-37292133|+	0.832406	0.442387	0.797765	0.0682417	66.7996
ENSMUSG00000020577	Tspan13	tetraspanin 13 [Source:MGI Symbol;Acc:MGI:1913359]	chr12:36014557-36042500|-	5.04732	2.77539	0.794678	0.001284	227.618
ENSMUSG00000026827	Gpd2	glycerol phosphate dehydrogenase 2, mitochondrial [Source:MGI Symbol;Acc:MGI:99778]	chr2:57237635-57370719|+	6.55112	3.52608	0.790672	0.0499994	683.083
ENSMUSG00000000340	Dbt	dihydrolipoamide branched chain transacylase E2 [Source:MGI Symbol;Acc:MGI:105386]	chr3:116513070-116549981|+	6.42225	3.53737	0.78584	0.01466	185.589
ENSMUSG00000092622	Khdc3	KH domain containing 3, subcortical maternal complex member [Source:MGI Symbol;Acc:MGI:1914241]	chr9:73101836-73104438|+	0.666531	0.330558	0.784234	0.0994469	113.585
ENSMUSG00000057596	Trim30d	tripartite motif-containing 30D [Source:MGI Symbol;Acc:MGI:3035181]	chr7:104470014-104507849|-	2.54857	1.39503	0.78315	0.0224081	120.727
ENSMUSG00000053317	Sec61b	Sec61 beta subunit [Source:MGI Symbol;Acc:MGI:1913462]	chr4:47474658-47483242|+	20.3427	11.3862	0.780669	4.28e-06	472.26
ENSMUSG00000024986	Hhex	hematopoietically expressed homeobox [Source:MGI Symbol;Acc:MGI:96086]	chr19:37434810-37440731|+	40.8536	23.0454	0.779538	1.16e-12	1271.82
ENSMUSG00000030094	Xpc	xeroderma pigmentosum, complementation group C [Source:MGI Symbol;Acc:MGI:103557]	chr6:91489305-91515888|-	3.84612	2.14877	0.778363	0.000776	293.85
ENSMUSG00000071235	Vrtn	vertebrae development associated [Source:MGI Symbol;Acc:MGI:3588197]	chr12:84641019-84651455|+	50.7463	28.6979	0.776576	3.37e-10	2870.94
ENSMUSG00000006941	Eif1b	eukaryotic translation initiation factor 1B [Source:MGI Symbol;Acc:MGI:1916219]	chr9:120492232-120495330|+	53.0454	29.9014	0.774721	1.5e-09	1183.67
ENSMUSG00000022304	Dpys	dihydropyrimidinase [Source:MGI Symbol;Acc:MGI:1928679]	chr15:39768485-39857470|-	4.38153	2.42943	0.773481	0.0136169	189.008
ENSMUSG00000035831	Krt25	keratin 25 [Source:MGI Symbol;Acc:MGI:1918060]	chr11:99315516-99322951|-	2.55864	1.37474	0.770284	0.0993863	69.0634
ENSMUSG00000037361	Sf3b6	splicing factor 3B, subunit 6 [Source:MGI Symbol;Acc:MGI:1913305]	chr12:4817544-4827659|+	1.91024	1.0543	0.769425	0.0239494	78.7311
ENSMUSG00000026504	Sdccag8	serologically defined colon cancer antigen 8 [Source:MGI Symbol;Acc:MGI:1924066]	chr1:176814660-177020437|+	1.14861	0.631571	0.766989	0.0247915	84.0795
ENSMUSG00000107392	Gm7792	predicted gene 7792 [Source:MGI Symbol;Acc:MGI:3704104]	chr5:93843776-93856107|+	7.50986	4.21402	0.765664	0.00482803	326.026
ENSMUSG00000023915	Tnfrsf21	tumor necrosis factor receptor superfamily, member 21 [Source:MGI Symbol;Acc:MGI:2151075]	chr17:43016555-43089188|+	12.5898	7.02106	0.762476	0.0120175	549.431
ENSMUSG00000095996	Gm16513	predicted gene, Gm16513 [Source:MGI Symbol;Acc:MGI:2141041]	chr5:95182624-95195342|+	10.955	6.21831	0.758861	0.00107871	558.334
ENSMUSG00000016940	Kctd2	potassium channel tetramerisation domain containing 2 [Source:MGI Symbol;Acc:MGI:1917632]	chr11:115420128-115431274|+	1.59934	0.87986	0.757802	0.0820112	80.8562
ENSMUSG00000004895	Prcc	papillary renal cell carcinoma (translocation-associated) [Source:MGI Symbol;Acc:MGI:2137738]	chr3:87858903-87885608|-	2.33867	1.29286	0.757532	0.0476972	74.1342
ENSMUSG00000079009	Gm14139	predicted gene 14139 [Source:MGI Symbol;Acc:MGI:3836251]	chr2:150181755-150193279|+	1.89453	1.03634	0.753376	0.0714217	50.4377
ENSMUSG00000096255	Dynlt1b	dynein light chain Tctex-type 1B [Source:MGI Symbol;Acc:MGI:98643]	chr17:6430112-6436293|+	57.6026	32.7783	0.752634	0.00022	727.805
ENSMUSG00000038717	Atp5l	ATP synthase, H+ transporting, mitochondrial F0 complex, subunit G [Source:MGI Symbol;Acc:MGI:1351597]	chr9:44912557-44920742|-	1.28828	0.72044	0.752096	0.008872	383.535
ENSMUSG00000042498	D330045A20Rik	RIKEN cDNA D330045A20 gene [Source:MGI Symbol;Acc:MGI:2147848]	chrX:139480367-139554582|+	1.24358	0.679916	0.750623	0.0995988	95.1685
ENSMUSG00000031497	Tnfsf13b	tumor necrosis factor (ligand) superfamily, member 13b [Source:MGI Symbol;Acc:MGI:1344376]	chr8:10006467-10039072|+	4.1054	2.35338	0.750544	2.73e-05	437.039
ENSMUSG00000005718	Tfap4	transcription factor AP4 [Source:MGI Symbol;Acc:MGI:103239]	chr16:4544661-4559720|-	2.82237	1.56916	0.750169	0.0742343	64.5301
ENSMUSG00000037894	H2afz	H2A histone family, member Z [Source:MGI Symbol;Acc:MGI:1888388]	chr3:137864487-137866922|+	17.6088	10.0731	0.747983	0.000461	489.11
ENSMUSG00000069089	Cdk7	cyclin-dependent kinase 7 [Source:MGI Symbol;Acc:MGI:102956]	chr13:100697027-100730942|-	3.33057	1.90801	0.746742	4.9e-05	345.704
ENSMUSG00000022848	Dirc2	disrupted in renal carcinoma 2 (human) [Source:MGI Symbol;Acc:MGI:2387188]	chr16:35694062-35769356|-	0.954067	0.529886	0.745403	0.0811613	79.2016
ENSMUSG00000052707	Tnrc6a	trinucleotide repeat containing 6a [Source:MGI Symbol;Acc:MGI:2385292]	chr7:123123885-123195296|+	3.82986	2.20522	0.744164	3.99e-06	736.707
ENSMUSG00000015619	Gata3	GATA binding protein 3 [Source:MGI Symbol;Acc:MGI:95663]	chr2:9857078-9890034|-	3.22568	1.85648	0.742541	0.00159856	184.395
ENSMUSG00000044763	Trmt10c	tRNA methyltransferase 10C [Source:MGI Symbol;Acc:MGI:1196261]	chr16:56032609-56037819|-	8.33255	4.77124	0.739949	0.00585148	331.675
ENSMUSG00000043496	Tril	TLR4 interactor with leucine-rich repeats [Source:MGI Symbol;Acc:MGI:1914123]	chr6:53815468-53820830|-	3.23143	1.86529	0.739357	0.000202	188.884
ENSMUSG00000030101	Sumf1	sulfatase modifying factor 1 [Source:MGI Symbol;Acc:MGI:1889844]	chr6:108107028-108185582|-	9.84419	5.70034	0.739085	2.38e-08	571.962
ENSMUSG00000036376	Abt1	activator of basal transcription 1 [Source:MGI Symbol;Acc:MGI:1353636]	chr13:23421539-23423866|-	3.86837	2.14422	0.738778	0.0487973	96.7988
ENSMUSG00000004891	Nes	nestin [Source:MGI Symbol;Acc:MGI:101784]	chr3:87971078-87980451|+	0.890547	0.508536	0.735157	0.0318571	82.6626
ENSMUSG00000095954	Gm3183	predicted gene 3183 [Source:MGI Symbol;Acc:MGI:3781362]	chr5:94865436-94885388|+	10.1361	5.85941	0.731543	0.00275981	524.783
ENSMUSG00000086727	4931428L18Rik	RIKEN cDNA 4931428L18 gene [Source:MGI Symbol;Acc:MGI:1918238]	chr1:31135226-31222684|-	23.4933	13.6396	0.730863	4.84e-06	480.078
ENSMUSG00000067338	Tuba3b	tubulin, alpha 3B [Source:MGI Symbol;Acc:MGI:1095408]	chr6:145615757-145621479|+	3.06468	1.73953	0.729538	0.0117517	139.677
ENSMUSG00000025272	Tro	trophinin [Source:MGI Symbol;Acc:MGI:1928994]	chrX:150645304-150657583|-	1.13378	0.647951	0.729042	0.0314428	108.514
ENSMUSG00000047517	Dmbt1	deleted in malignant brain tumors 1 [Source:MGI Symbol;Acc:MGI:106210]	chr7:131032053-131121630|+	0.597951	0.342333	0.727658	0.0295979	82.5385
ENSMUSG00000028927	Padi2	peptidyl arginine deiminase, type II [Source:MGI Symbol;Acc:MGI:1338892]	chr4:140906344-140952586|+	0.934808	0.532291	0.725098	0.0985472	57.0219
ENSMUSG00000021456	Fbp2	fructose bisphosphatase 2 [Source:MGI Symbol;Acc:MGI:95491]	chr13:62836877-62858422|-	3.81318	2.20455	0.72475	0.0166644	107.086
ENSMUSG00000026072	Il1r1	interleukin 1 receptor, type I [Source:MGI Symbol;Acc:MGI:96545]	chr1:40225080-40317257|+	24.0059	14.0317	0.723297	3.05e-05	1664.47
ENSMUSG00000021130	Galnt16	UDP-N-acetyl-alpha-D-galactosamine:polypeptide N-acetylgalactosaminyltransferase 16 [Source:MGI Symbol;Acc:MGI:1917754]	chr12:80518277-80630972|+	0.489284	0.27728	0.723207	0.0595094	56.4802
ENSMUSG00000020988	L2hgdh	L-2-hydroxyglutarate dehydrogenase [Source:MGI Symbol;Acc:MGI:2384968]	chr12:69690433-69724873|-	2.18817	1.24534	0.721403	0.0897198	134.229
ENSMUSG00000020492	Ska2	spindle and kinetochore associated complex subunit 2 [Source:MGI Symbol;Acc:MGI:1913390]	chr11:87109234-87124635|+	2.8826	1.6778	0.720824	0.0092046	118.672
ENSMUSG00000061175	Fnip2	folliculin interacting protein 2 [Source:MGI Symbol;Acc:MGI:2683054]	chr3:79455974-79567796|-	2.01154	1.17909	0.717525	0.00164633	216.98
ENSMUSG00000014470	Rnf166	ring finger protein 166 [Source:MGI Symbol;Acc:MGI:1915968]	chr8:122466147-122476064|-	11.1753	6.53513	0.717057	7.06e-05	297.505
ENSMUSG00000024800	Rpp30	ribonuclease P/MRP 30 subunit [Source:MGI Symbol;Acc:MGI:1859683]	chr19:36083716-36104772|+	11.3609	6.588	0.715992	0.0104754	189.335
ENSMUSG00000049659	Aftph	aftiphilin [Source:MGI Symbol;Acc:MGI:1923012]	chr11:20685084-20741589|-	13.5628	8.00206	0.715563	7.08e-10	1297.01
ENSMUSG00000037353	Letmd1	LETM1 domain containing 1 [Source:MGI Symbol;Acc:MGI:1915864]	chr15:100469034-100479252|+	2.95343	1.68478	0.715024	0.0743259	91.8961
ENSMUSG00000020689	Itgb3	integrin beta 3 [Source:MGI Symbol;Acc:MGI:96612]	chr11:104608000-104670476|+	18.1186	10.6595	0.714269	9.25e-07	1959.72
ENSMUSG00000090733	Rps27	ribosomal protein S27 [Source:MGI Symbol;Acc:MGI:1888676]	chr3:90212522-90213651|-	6.55336	3.82542	0.709578	0.0071804	282.256
ENSMUSG00000020910	Adprm	ADP-ribose/CDP-alcohol diphosphatase, manganese dependent [Source:MGI Symbol;Acc:MGI:1913608]	chr11:67037905-67052594|-	1.5542	0.890982	0.708747	0.0782933	60.0741
ENSMUSG00000021361	Tmem14c	transmembrane protein 14C [Source:MGI Symbol;Acc:MGI:1913404]	chr13:41016250-41022575|+	47.901	28.2849	0.707148	1.15e-05	1163.8
ENSMUSG00000054717	Hmgb2	high mobility group box 2 [Source:MGI Symbol;Acc:MGI:96157]	chr8:57511907-57515999|+	252.256	150.138	0.705881	1.38e-12	9181.54
ENSMUSG00000063434	Sorcs3	sortilin-related VPS10 domain containing receptor 3 [Source:MGI Symbol;Acc:MGI:1913923]	chr19:48206025-48805505|+	1.54399	0.897725	0.704095	0.023008	139.466
ENSMUSG00000029563	Foxp2	forkhead box P2 [Source:MGI Symbol;Acc:MGI:2148705]	chr6:14901349-15441977|+	1.16452	0.685619	0.701305	0.0111408	273.057
ENSMUSG00000021245	Mlh3	mutL homolog 3 [Source:MGI Symbol;Acc:MGI:1353455]	chr12:85234520-85270599|-	0.999166	0.587526	0.700124	0.0329648	116.572
ENSMUSG00000096044	Gm16427	predicted gene 16427 [Source:MGI Symbol;Acc:MGI:3704103]	chr5:93481829-93540200|-	10.9183	6.46783	0.699779	0.00158715	395.133
ENSMUSG00000040123	Zmym5	zinc finger, MYM-type 5 [Source:MGI Symbol;Acc:MGI:3041170]	chr14:56790585-56811716|-	1.93371	1.12276	0.698918	0.0599993	179.797
ENSMUSG00000024258	Polr2d	polymerase (RNA) II (DNA directed) polypeptide D [Source:MGI Symbol;Acc:MGI:1916491]	chr18:31789159-31796642|+	188.697	112.511	0.697693	1.34e-05	1734.38
ENSMUSG00000035299	Mid1	midline 1 [Source:MGI Symbol;Acc:MGI:1100537]	chrX:169685199-170005736|+	13.8986	8.15851	0.69717	0.0295649	1343.27
ENSMUSG00000037375	Hhat	hedgehog acyltransferase [Source:MGI Symbol;Acc:MGI:2444681]	chr1:192496711-192771223|-	4.30481	2.54953	0.691194	0.00989312	570.613
ENSMUSG00000035666	Gtf3c4	general transcription factor IIIC, polypeptide 4 [Source:MGI Symbol;Acc:MGI:2138937]	chr2:28822299-28840360|-	0.891588	0.524845	0.689124	0.0585275	84.8125
ENSMUSG00000027882	Stxbp3	syntaxin binding protein 3 [Source:MGI Symbol;Acc:MGI:107362]	chr3:108793176-108840526|-	2.10274	1.25383	0.683595	0.00646769	191.41
ENSMUSG00000029648	Flt1	FMS-like tyrosine kinase 1 [Source:MGI Symbol;Acc:MGI:95558]	chr5:147561604-147726011|-	2.80561	1.68067	0.680684	0.00455038	372.813
ENSMUSG00000028161	Ppp3ca	protein phosphatase 3, catalytic subunit, alpha isoform [Source:MGI Symbol;Acc:MGI:107164]	chr3:136670124-136937727|+	1.65162	0.991815	0.678876	0.00304079	239.15
ENSMUSG00000079555	Haus3	HAUS augmin-like complex, subunit 3 [Source:MGI Symbol;Acc:MGI:2387633]	chr5:34153880-34169527|-	44.9208	27.232	0.677862	1.92e-08	2344.1
ENSMUSG00000078949	R3hdml	R3H domain containing-like [Source:MGI Symbol;Acc:MGI:3650937]	chr2:163492318-163502612|+	6.49859	3.87629	0.677275	0.0318571	109.136
ENSMUSG00000022889	Mrpl39	mitochondrial ribosomal protein L39 [Source:MGI Symbol;Acc:MGI:1351620]	chr16:84717576-84735742|-	9.02956	5.39909	0.67458	0.0249559	308.838
ENSMUSG00000026188	Tmem169	transmembrane protein 169 [Source:MGI Symbol;Acc:MGI:2442781]	chr1:72284369-72303104|+	14.3977	8.71927	0.672185	0.000137	626.636
ENSMUSG00000044408	Sptssa	serine palmitoyltransferase, small subunit A [Source:MGI Symbol;Acc:MGI:1913399]	chr12:54645392-54656573|-	4.78104	2.82528	0.671414	0.0620694	110.387
ENSMUSG00000053113	Socs3	suppressor of cytokine signaling 3 [Source:MGI Symbol;Acc:MGI:1201791]	chr11:117966079-117970047|-	1.74928	1.04741	0.670725	0.0779426	56.9333
ENSMUSG00000096259	Gm3106	predicted gene 3106 [Source:MGI Symbol;Acc:MGI:3781282]	chr5:94218005-94222010|+	18.077	10.9723	0.669708	0.000642	688.907
ENSMUSG00000035958	Tdp2	tyrosyl-DNA phosphodiesterase 2 [Source:MGI Symbol;Acc:MGI:1860486]	chr13:24831679-24842153|+	13.888	8.45909	0.669171	5.94e-06	341.379
ENSMUSG00000022043	Trim35	tripartite motif-containing 35 [Source:MGI Symbol;Acc:MGI:1914104]	chr14:66297031-66311424|+	5.09532	3.08416	0.66738	0.00192339	289.278
ENSMUSG00000057715	A830018L16Rik	RIKEN cDNA A830018L16 gene [Source:MGI Symbol;Acc:MGI:2444149]	chr1:11414105-11975901|+	0.650616	0.386803	0.665666	0.0553072	81.8565
ENSMUSG00000052033	Pfdn4	prefoldin 4 [Source:MGI Symbol;Acc:MGI:1923512]	chr2:170496428-170519123|+	151.902	92.6611	0.664758	4.83e-06	4711.6
ENSMUSG00000021400	Wrnip1	Werner helicase interacting protein 1 [Source:MGI Symbol;Acc:MGI:1926153]	chr13:32802038-32822609|+	3.43029	2.08706	0.663809	0.0117111	154.874
ENSMUSG00000068154	Insm1	insulinoma-associated 1 [Source:MGI Symbol;Acc:MGI:1859980]	chr2:146221921-146225020|+	6.96787	4.16045	0.66287	0.0866645	283.541
ENSMUSG00000029190	D5Ertd579e	DNA segment, Chr 5, ERATO Doi 579, expressed [Source:MGI Symbol;Acc:MGI:1261849]	chr5:36600485-36696024|-	2.41984	1.47899	0.662039	5.97e-05	609.349
ENSMUSG00000034892	Rps29	ribosomal protein S29 [Source:MGI Symbol;Acc:MGI:107681]	chr12:69157722-69159186|-	10.3565	6.22713	0.661251	0.0173118	429.814
ENSMUSG00000048550	Thnsl1	threonine synthase-like 1 (bacterial) [Source:MGI Symbol;Acc:MGI:2139347]	chr2:21205724-21215009|+	4.32725	2.62085	0.660157	0.00806852	267.64
ENSMUSG00000037296	Lsm1	LSM1 homolog, mRNA degradation associated [Source:MGI Symbol;Acc:MGI:1914457]	chr8:25785288-25803975|+	5.49318	3.34578	0.65831	0.0117561	286.338
ENSMUSG00000024154	Gtf2a1l	general transcription factor IIA, 1-like [Source:MGI Symbol;Acc:MGI:1919078]	chr17:88668660-88715152|+	15.4378	9.29485	0.657974	0.0616539	337.533
ENSMUSG00000021131	Erh	enhancer of rudimentary homolog (Drosophila) [Source:MGI Symbol;Acc:MGI:108089]	chr12:80634022-80644341|-	25.6884	15.7589	0.65796	3.01e-07	1011.81
ENSMUSG00000034171	Faah	fatty acid amide hydrolase [Source:MGI Symbol;Acc:MGI:109609]	chr4:115967145-116017926|-	0.709816	0.42475	0.657822	0.0591182	86.5753
ENSMUSG00000027905	Ddx20	DEAD (Asp-Glu-Ala-Asp) box polypeptide 20 [Source:MGI Symbol;Acc:MGI:1858415]	chr3:105678270-105687574|-	2.4318	1.47188	0.656791	0.0214325	166.656
ENSMUSG00000030342	Cd9	CD9 antigen [Source:MGI Symbol;Acc:MGI:88348]	chr6:125460266-125494791|-	15.135	9.28162	0.656171	0.000279	420.019
ENSMUSG00000028179	Cth	cystathionase (cystathionine gamma-lyase) [Source:MGI Symbol;Acc:MGI:1339968]	chr3:157894248-157925077|-	7.49772	4.57498	0.655506	0.00784334	295.496
ENSMUSG00000021497	Txndc15	thioredoxin domain containing 15 [Source:MGI Symbol;Acc:MGI:1916922]	chr13:55714650-55726221|+	3.85608	2.32329	0.655272	0.0764706	81.7064
ENSMUSG00000042607	Asb4	ankyrin repeat and SOCS box-containing 4 [Source:MGI Symbol;Acc:MGI:1929751]	chr6:5383386-5433022|+	6.32428	3.85831	0.654727	0.00278509	361.498
ENSMUSG00000043067	Dpy19l1	dpy-19-like 1 (C. elegans) [Source:MGI Symbol;Acc:MGI:1915685]	chr9:24411776-24503140|-	18.3839	11.3466	0.649834	9.05e-06	1147.56
ENSMUSG00000020029	Nudt4	nudix (nucleoside diphosphate linked moiety X)-type motif 4 [Source:MGI Symbol;Acc:MGI:1918457]	chr10:95547007-95564146|-	9.24728	5.6936	0.645342	0.0021229	402.381
ENSMUSG00000030357	Fkbp4	FK506 binding protein 4 [Source:MGI Symbol;Acc:MGI:95543]	chr6:128429735-128438677|-	3.20375	1.96565	0.642121	0.0196782	179.29
ENSMUSG00000071176	Arhgef10	Rho guanine nucleotide exchange factor (GEF) 10 [Source:MGI Symbol;Acc:MGI:2444453]	chr8:14911663-15001085|+	0.668831	0.405792	0.640042	0.0805953	74.9919
ENSMUSG00000021990	Spata13	spermatogenesis associated 13 [Source:MGI Symbol;Acc:MGI:104838]	chr14:60634001-60764556|+	1.97454	1.224	0.638759	0.000941	231.345
ENSMUSG00000028322	Exosc3	exosome component 3 [Source:MGI Symbol;Acc:MGI:1913612]	chr4:45316613-45342732|-	32.6434	20.2816	0.637879	3.44e-07	578.36
ENSMUSG00000020212	Mdm1	transformed mouse 3T3 cell double minute 1 [Source:MGI Symbol;Acc:MGI:96951]	chr10:118141811-118168997|+	5.81043	3.59753	0.63743	0.00244439	308.369
ENSMUSG00000021519	Mterf3	mitochondrial transcription termination factor 3 [Source:MGI Symbol;Acc:MGI:1913660]	chr13:66906968-66933088|-	2.57087	1.57536	0.635086	0.0673034	198.519
ENSMUSG00000022253	Nadk2	NAD kinase 2, mitochondrial [Source:MGI Symbol;Acc:MGI:1915896]	chr15:9071260-9110487|+	1.66364	1.01626	0.633911	0.0639133	117.271
ENSMUSG00000014313	Cox6c	cytochrome c oxidase subunit VIc [Source:MGI Symbol;Acc:MGI:104614]	chr15:35925886-35938246|-	3.22818	1.98183	0.633368	0.0235639	351.608
ENSMUSG00000030924	2610020H08Rik	RIKEN cDNA 2610020H08 gene [Source:MGI Symbol;Acc:MGI:1919402]	chr7:119794006-119848943|+	1.00919	0.621484	0.63129	0.0639133	78.6327
ENSMUSG00000002728	Naa20	N(alpha)-acetyltransferase 20, NatB catalytic subunit [Source:MGI Symbol;Acc:MGI:1915127]	chr2:145902099-145916425|+	5.67357	3.52875	0.630643	0.00452068	290.055
ENSMUSG00000036934	4921524J17Rik	RIKEN cDNA 4921524J17 gene [Source:MGI Symbol;Acc:MGI:1913964]	chr8:85408759-85432833|-	79.6329	49.9245	0.629326	5.35e-09	1440.21
ENSMUSG00000029729	Zkscan1	zinc finger with KRAB and SCAN domains 1 [Source:MGI Symbol;Acc:MGI:1921820]	chr5:138085084-138107822|+	10.6715	6.70442	0.626451	6.31e-08	1289.51
ENSMUSG00000055789	E330017A01Rik	RIKEN cDNA E330017A01 gene [Source:MGI Symbol;Acc:MGI:3045360]	chr16:58635167-58638739|-	80.5253	50.6685	0.623554	4.74e-07	3090.44
ENSMUSG00000046709	Mapk10	mitogen-activated protein kinase 10 [Source:MGI Symbol;Acc:MGI:1346863]	chr5:102907948-103211334|-	0.948618	0.583828	0.623492	0.0412107	157.244
ENSMUSG00000026429	Ube2t	ubiquitin-conjugating enzyme E2T [Source:MGI Symbol;Acc:MGI:1914446]	chr1:134962565-134974162|+	31.488	19.8654	0.620359	6.14e-08	1831.28
ENSMUSG00000020612	Prkar1a	protein kinase, cAMP dependent regulatory, type I, alpha [Source:MGI Symbol;Acc:MGI:104878]	chr11:109649405-109669656|+	18.3274	11.5843	0.618406	7.2e-09	1216.42
ENSMUSG00000001768	Rin2	Ras and Rab interactor 2 [Source:MGI Symbol;Acc:MGI:1921280]	chr2:145784734-145887616|+	2.81926	1.77908	0.616268	0.0113894	210.818
ENSMUSG00000020923	Ubtf	upstream binding transcription factor, RNA polymerase I [Source:MGI Symbol;Acc:MGI:98512]	chr11:102304560-102319742|-	1.17479	0.731057	0.615757	0.0827045	130.812
ENSMUSG00000034345	Gtf2h5	general transcription factor IIH, polypeptide 5 [Source:MGI Symbol;Acc:MGI:107227]	chr17:6079786-6086517|+	3.00479	1.87858	0.615041	0.0210909	285.056
ENSMUSG00000003099	Ppp5c	protein phosphatase 5, catalytic subunit [Source:MGI Symbol;Acc:MGI:102666]	chr7:17004640-17027924|-	2.07494	1.28891	0.615035	0.0769254	93.9988
ENSMUSG00000056987	Fam71d	family with sequence similarity 71, member D [Source:MGI Symbol;Acc:MGI:1918147]	chr12:78691535-78734516|+	2.49726	1.54116	0.612016	0.0963264	85.5806
ENSMUSG00000024431	Nr3c1	nuclear receptor subfamily 3, group C, member 1 [Source:MGI Symbol;Acc:MGI:95824]	chr18:39410545-39491301|-	1.88328	1.17621	0.611694	0.0248558	195.608
ENSMUSG00000001891	Ugp2	UDP-glucose pyrophosphorylase 2 [Source:MGI Symbol;Acc:MGI:2183447]	chr11:21321138-21371201|-	4.31166	2.69061	0.610702	0.0649737	209.112
ENSMUSG00000007411	Mark3	MAP/microtubule affinity regulating kinase 3 [Source:MGI Symbol;Acc:MGI:1341865]	chr12:111574523-111656221|+	0.856434	0.539542	0.609257	0.0299319	166.436
ENSMUSG00000039153	Runx2	runt related transcription factor 2 [Source:MGI Symbol;Acc:MGI:99829]	chr17:44495987-44814797|-	2.74193	1.74266	0.604872	0.00700856	378.264
ENSMUSG00000042195	Slc35f2	solute carrier family 35, member F2 [Source:MGI Symbol;Acc:MGI:1919272]	chr9:53771538-53818154|+	7.38605	4.61606	0.604456	0.0994469	328.76
ENSMUSG00000029125	Stx18	syntaxin 18 [Source:MGI Symbol;Acc:MGI:1918366]	chr5:38038742-38137765|+	2.13304	1.34816	0.601886	0.0153622	151.448
ENSMUSG00000037818	Abhd18	abhydrolase domain containing 18 [Source:MGI Symbol;Acc:MGI:1915468]	chr3:40846970-40938138|+	1.38973	0.88133	0.601286	0.0111408	232.872
ENSMUSG00000072934	Trpc5os	transient receptor potential cation channel, subfamily C, member 5, opposite strand [Source:MGI Symbol;Acc:MGI:3641805]	chrX:144456581-144477066|+	2.6414	1.67009	0.599712	0.0891347	138.621
ENSMUSG00000020561	Twistnb	twist basic helix-loop-helix transcription factor 1 neighbor [Source:MGI Symbol;Acc:MGI:106292]	chr12:33429635-33441392|+	2.87898	1.81682	0.598575	0.0673034	247.151
ENSMUSG00000025950	Idh1	isocitrate dehydrogenase 1 (NADP+), soluble [Source:MGI Symbol;Acc:MGI:96413]	chr1:65158616-65186500|-	10.7647	6.8797	0.598026	0.00404402	400.868
ENSMUSG00000037072	Selenof	selenoprotein F [Source:MGI Symbol;Acc:MGI:1927947]	chr3:144570304-144597680|+	17.5279	11.2393	0.597479	1e-07	1242.87
ENSMUSG00000039578	Ccser1	coiled-coil serine rich 1 [Source:MGI Symbol;Acc:MGI:3045354]	chr6:61180324-62382865|+	4.75504	3.05259	0.597134	0.000166	722.637
ENSMUSG00000092074	Dynlt1a	dynein light chain Tctex-type 1A [Source:MGI Symbol;Acc:MGI:3807506]	chr17:6310547-6317474|-	33.4586	21.2636	0.594685	0.00735359	433.011
ENSMUSG00000021288	Klc1	kinesin light chain 1 [Source:MGI Symbol;Acc:MGI:107978]	chr12:111758849-111807844|+	3.83122	2.44948	0.593622	0.010935	222.271
ENSMUSG00000035273	Hpse	heparanase [Source:MGI Symbol;Acc:MGI:1343124]	chr5:100679484-100719716|-	7.51438	4.76544	0.593321	0.0507753	356.364
ENSMUSG00000055745	Ldoc1l	leucine zipper, down-regulated in cancer 1-like [Source:MGI Symbol;Acc:MGI:2675858]	chr15:84553398-84557823|-	3.27034	2.09876	0.589434	0.00610407	207.229
ENSMUSG00000048897	Zfp710	zinc finger protein 710 [Source:MGI Symbol;Acc:MGI:1921747]	chr7:80024814-80094173|+	5.709	3.64384	0.588968	0.0321876	423.009
ENSMUSG00000074748	Atxn7l3b	ataxin 7-like 3B [Source:MGI Symbol;Acc:MGI:1914971]	chr10:112925430-112929001|-	3.11251	2.00063	0.580478	0.0673034	171.552
ENSMUSG00000017132	Cyth1	cytohesin 1 [Source:MGI Symbol;Acc:MGI:1334257]	chr11:118132019-118248592|-	5.29545	3.41966	0.579759	0.0117029	300.095
ENSMUSG00000025362	Rps26	ribosomal protein S26 [Source:MGI Symbol;Acc:MGI:1351628]	chr10:128624534-128626747|-	3.3069	2.08817	0.579502	0.067183	296.848
ENSMUSG00000073725	Lmbrd1	LMBR1 domain containing 1 [Source:MGI Symbol;Acc:MGI:1915671]	chr1:24678630-24766301|+	4.94471	3.20176	0.577932	0.0037603	360.734
ENSMUSG00000021758	Ddx4	DEAD (Asp-Glu-Ala-Asp) box polypeptide 4 [Source:MGI Symbol;Acc:MGI:102670]	chr13:112598333-112652310|-	13.3873	8.65563	0.576837	0.00848392	566.605
ENSMUSG00000022684	Bfar	bifunctional apoptosis regulator [Source:MGI Symbol;Acc:MGI:1914368]	chr16:13671858-13703612|+	4.68603	3.04158	0.574494	0.00455794	335.351
ENSMUSG00000071324	Armc2	armadillo repeat containing 2 [Source:MGI Symbol;Acc:MGI:1916449]	chr10:41914990-42018442|-	2.12292	1.36399	0.573664	0.0588602	191.114
ENSMUSG00000026455	Klhl12	kelch-like 12 [Source:MGI Symbol;Acc:MGI:2385619]	chr1:134455531-134491018|+	1.97405	1.28687	0.573142	0.00239167	386.632
ENSMUSG00000059005	Hnrnpa3	heterogeneous nuclear ribonucleoprotein A3 [Source:MGI Symbol;Acc:MGI:1917171]	chr2:75659261-75669407|+	86.5182	56.5745	0.572208	1.56e-14	6842.44
ENSMUSG00000041423	Paqr6	progestin and adipoQ receptor family member VI [Source:MGI Symbol;Acc:MGI:1916207]	chr3:88364584-88368541|+	4.23414	2.73161	0.571918	0.062882	181.587
ENSMUSG00000074311	Vmn1r139	vomeronasal 1 receptor 139 [Source:MGI Symbol;Acc:MGI:3644494]	chr7:22069057-22097907|+	84.0205	54.8763	0.571403	1.66e-05	1462.12
ENSMUSG00000069806	Cacng7	calcium channel, voltage-dependent, gamma subunit 7 [Source:MGI Symbol;Acc:MGI:1932374]	chr7:3332955-3368221|+	7.41948	4.78563	0.570912	0.0602163	227.251
ENSMUSG00000027508	Pag1	phosphoprotein associated with glycosphingolipid microdomains 1 [Source:MGI Symbol;Acc:MGI:2443160]	chr3:9687479-9833679|-	11.248	7.34522	0.569399	0.000291	1173.67
ENSMUSG00000071072	Ptges3	prostaglandin E synthase 3 (cytosolic) [Source:MGI Symbol;Acc:MGI:1929282]	chr10:128058954-128077272|+	90.9411	59.5328	0.565282	0.000619	3142.3
ENSMUSG00000038214	Bend3	BEN domain containing 3 [Source:MGI Symbol;Acc:MGI:2677212]	chr10:43478831-43515396|+	2.01632	1.30894	0.564376	0.0318571	218.474
ENSMUSG00000058706	0610030E20Rik	RIKEN cDNA 0610030E20 gene [Source:MGI Symbol;Acc:MGI:1915614]	chr6:72347317-72353148|+	1.62719	1.05301	0.564259	0.0639133	157.025
ENSMUSG00000044627	Swi5	SWI5 recombination repair homolog (yeast) [Source:MGI Symbol;Acc:MGI:1920181]	chr2:32278816-32288075|-	10.6443	6.97292	0.563906	0.00022	943.59
ENSMUSG00000028656	Cap1	CAP, adenylate cyclase-associated protein 1 (yeast) [Source:MGI Symbol;Acc:MGI:88262]	chr4:122859047-122886056|-	3.42289	2.22196	0.563726	0.0176991	179.773
ENSMUSG00000024661	Fth1	ferritin heavy polypeptide 1 [Source:MGI Symbol;Acc:MGI:95588]	chr19:9982703-9985092|+	8.72247	5.57954	0.563678	0.0817206	375.444
ENSMUSG00000027233	Patl2	protein associated with topoisomerase II homolog 2 (yeast) [Source:MGI Symbol;Acc:MGI:1914828]	chr2:122120108-122186189|-	16.4398	10.7511	0.562278	0.0102112	565.4
ENSMUSG00000041729	Coro2b	coronin, actin binding protein, 2B [Source:MGI Symbol;Acc:MGI:2444283]	chr9:62419492-62537044|-	19.2613	12.5355	0.561901	0.0262008	1505.43
ENSMUSG00000059070	Rpl18	ribosomal protein L18 [Source:MGI Symbol;Acc:MGI:98003]	chr7:45715457-45720836|+	2.89824	1.88123	0.560707	0.044326	320.736
ENSMUSG00000042507	Elmsan1	ELM2 and Myb/SANT-like domain containing 1 [Source:MGI Symbol;Acc:MGI:2685106]	chr12:84149176-84218881|-	4.33464	2.84885	0.560009	0.000475	431.212
ENSMUSG00000063430	Wscd2	WSC domain containing 2 [Source:MGI Symbol;Acc:MGI:2445030]	chr5:113490333-113589725|+	0.881831	0.578471	0.559762	0.0208324	160.107
ENSMUSG00000053367	Epp13	epididymal protein 13 [Source:MGI Symbol;Acc:MGI:3643580]	chr7:6252710-6282066|+	14.6147	9.60119	0.558895	0.00680807	279.776
ENSMUSG00000030204	Ddx47	DEAD (Asp-Glu-Ala-Asp) box polypeptide 47 [Source:MGI Symbol;Acc:MGI:1915005]	chr6:135011612-135023776|+	5.28489	3.48091	0.558615	7.06e-05	586.97
ENSMUSG00000041075	Fzd7	frizzled class receptor 7 [Source:MGI Symbol;Acc:MGI:108570]	chr1:59482424-59486955|+	10.9519	7.16168	0.556112	0.0497258	448.746
ENSMUSG00000038600	Atp6v0a4	ATPase, H+ transporting, lysosomal V0 subunit A4 [Source:MGI Symbol;Acc:MGI:2153480]	chr6:38048483-38124586|-	5.43865	3.5826	0.554235	0.00522541	359.39
ENSMUSG00000060938	Rpl26	ribosomal protein L26 [Source:MGI Symbol;Acc:MGI:106022]	chr11:68901583-68906989|+	3.91485	2.53028	0.553368	0.0553072	195.232
ENSMUSG00000031107	Rbmx2	RNA binding motif protein, X-linked 2 [Source:MGI Symbol;Acc:MGI:1919414]	chrX:48695004-48710723|+	3.81283	2.49823	0.55294	0.0846507	133.265
ENSMUSG00000034990	Otoa	otoancorin [Source:MGI Symbol;Acc:MGI:2149209]	chr7:121081650-121163097|+	1.01579	0.668458	0.550392	0.0491572	132.369
ENSMUSG00000028668	Eloa	elongin A [Source:MGI Symbol;Acc:MGI:1351315]	chr4:136003368-136021763|-	5.09975	3.35051	0.548286	0.0673034	443.612
ENSMUSG00000026705	Klhl20	kelch-like 20 [Source:MGI Symbol;Acc:MGI:2444855]	chr1:161088375-161131511|-	1.1171	0.739139	0.547048	0.0261985	200.843
ENSMUSG00000079658	Eloc	elongin C [Source:MGI Symbol;Acc:MGI:1915173]	chr1:16641725-16657042|-	34.6355	22.973	0.546152	0.00259046	2176.77
ENSMUSG00000052406	Rexo4	REX4, 3'-5' exonuclease [Source:MGI Symbol;Acc:MGI:2684957]	chr2:26953563-26964386|-	2.01224	1.32715	0.544263	0.0649207	154.473
ENSMUSG00000032097	Ddx6	DEAD (Asp-Glu-Ala-Asp) box polypeptide 6 [Source:MGI Symbol;Acc:MGI:104976]	chr9:44604892-44640731|+	6.10282	4.05408	0.543881	0.00690471	847.969
ENSMUSG00000028838	Extl1	exostoses (multiple)-like 1 [Source:MGI Symbol;Acc:MGI:1888742]	chr4:134356372-134383850|-	5.05452	3.32462	0.543788	0.03431	401.446
ENSMUSG00000002307	Daxx	Fas death domain-associated protein [Source:MGI Symbol;Acc:MGI:1197015]	chr17:33909414-33915589|+	20.702	13.7821	0.54285	2.87e-05	864.569
ENSMUSG00000011463	Cpb1	carboxypeptidase B1 (tissue) [Source:MGI Symbol;Acc:MGI:1923953]	chr3:20248264-20275733|-	2.41757	1.59126	0.542757	0.0879024	124.943
ENSMUSG00000002064	Sdf2	stromal cell derived factor 2 [Source:MGI Symbol;Acc:MGI:108019]	chr11:78245746-78255496|+	24.9173	16.5536	0.540486	0.00585148	515.206
ENSMUSG00000029430	Ran	RAN, member RAS oncogene family [Source:MGI Symbol;Acc:MGI:1333112]	chr5:129020069-129024323|+	6.8839	4.58578	0.53794	0.00795219	491.19
ENSMUSG00000000579	Dynlt1c	dynein light chain Tctex-type 1C [Source:MGI Symbol;Acc:MGI:3807476]	chr17:6601671-6609774|+	10.4355	6.95361	0.535229	0.0023907	629.359
ENSMUSG00000050931	Sgms2	sphingomyelin synthase 2 [Source:MGI Symbol;Acc:MGI:1921692]	chr3:131318985-131491411|-	1.81423	1.20032	0.534864	0.0995988	145.324
ENSMUSG00000026078	Pdcl3	phosducin-like 3 [Source:MGI Symbol;Acc:MGI:1916083]	chr1:38985608-38997238|+	23.414	15.7291	0.529908	2.63e-06	1152.3
ENSMUSG00000053470	Kdm3a	lysine (K)-specific demethylase 3A [Source:MGI Symbol;Acc:MGI:98847]	chr6:71588972-71632990|-	1.09591	0.730067	0.529848	0.0602163	149.278
ENSMUSG00000074322	Vmn1r132	vomeronasal 1 receptor 132 [Source:MGI Symbol;Acc:MGI:3647009]	chr7:21614092-21614985|+	60.3308	40.5595	0.528966	0.000345	737.21
ENSMUSG00000031984	2810004N23Rik	RIKEN cDNA 2810004N23 gene [Source:MGI Symbol;Acc:MGI:1913773]	chr8:124836945-124863120|-	1.7083	1.13868	0.52579	0.0997635	210.675
ENSMUSG00000022803	Popdc2	popeye domain containing 2 [Source:MGI Symbol;Acc:MGI:1930150]	chr16:38362209-38378216|+	8.3589	5.5852	0.525488	0.0496688	278.42
ENSMUSG00000020840	Blmh	bleomycin hydrolase [Source:MGI Symbol;Acc:MGI:1345186]	chr11:76924809-76987379|+	9.2298	6.20323	0.524238	0.00172873	1095.26
ENSMUSG00000022033	Pbk	PDZ binding kinase [Source:MGI Symbol;Acc:MGI:1289156]	chr14:65805837-65817822|+	10.5274	7.03864	0.524117	0.0697783	304.65
ENSMUSG00000028271	Gtf2b	general transcription factor IIB [Source:MGI Symbol;Acc:MGI:2385191]	chr3:142765045-142783606|+	57.5145	38.9913	0.51831	1.37e-05	4071.03
ENSMUSG00000026511	srp.09	signal recognition particle 9 [Source:MGI Symbol;Acc:MGI:1350930]	chr1:182124737-182132407|+	14.1462	9.59337	0.515977	1.52e-05	1140.45
ENSMUSG00000034450	Gulo	gulonolactone (L-) oxidase [Source:MGI Symbol;Acc:MGI:1353434]	chr14:65986787-66009210|-	4.39703	2.96306	0.515613	0.0688039	146.13
ENSMUSG00000070493	Chchd2	coiled-coil-helix-coiled-coil-helix domain containing 2 [Source:MGI Symbol;Acc:MGI:1261428]	chr5:129881156-129887470|-	7.6532	5.13562	0.515551	0.0241263	1051.06
ENSMUSG00000047824	Pygo2	pygopus 2 [Source:MGI Symbol;Acc:MGI:1916161]	chr3:89430214-89435128|+	3.41759	2.30824	0.515349	0.0332521	212.158
ENSMUSG00000025722	Wdr73	WD repeat domain 73 [Source:MGI Symbol;Acc:MGI:1919218]	chr7:80890723-80901269|-	3.99337	2.68987	0.513303	0.0775427	242.14
ENSMUSG00000029370	Rassf6	Ras association (RalGDS/AF-6) domain family member 6 [Source:MGI Symbol;Acc:MGI:1920496]	chr5:90603076-90640657|-	2.36924	1.59787	0.512209	0.0906687	168.43
ENSMUSG00000043943	Naalad2	N-acetylated alpha-linked acidic dipeptidase 2 [Source:MGI Symbol;Acc:MGI:1919810]	chr9:18321951-18402995|-	8.57088	5.80816	0.511455	0.0104754	574.091
ENSMUSG00000021255	Esrrb	estrogen related receptor, beta [Source:MGI Symbol;Acc:MGI:1346832]	chr12:86361117-86521628|+	5.91682	4.00697	0.510771	0.00282105	616.56
ENSMUSG00000052419	2610001J05Rik	RIKEN cDNA 2610001J05 gene [Source:MGI Symbol;Acc:MGI:1913770]	chr6:13867735-13871518|-	3.56514	2.41538	0.510711	0.0463178	194.483
ENSMUSG00000041872	Il17f	interleukin 17F [Source:MGI Symbol;Acc:MGI:2676631]	chr1:20777146-20790617|-	20.4785	13.875	0.510539	0.0329666	574.102
ENSMUSG00000039329	Tex19.1	testis expressed gene 19.1 [Source:MGI Symbol;Acc:MGI:1920929]	chr11:121146143-121148319|+	56.589	38.4367	0.510315	0.00605674	1351.85
ENSMUSG00000032714	Syde1	synapse defective 1, Rho GTPase, homolog 1 (C. elegans) [Source:MGI Symbol;Acc:MGI:1918959]	chr10:78584503-78591964|-	7.25143	4.90946	0.507833	0.0954699	364.946
ENSMUSG00000028081	Rps3a1	ribosomal protein S3A1 [Source:MGI Symbol;Acc:MGI:1202063]	chr3:86137940-86142702|-	8.2776	5.63761	0.507665	0.0992201	293.494
ENSMUSG00000055546	Timd4	T cell immunoglobulin and mucin domain containing 4 [Source:MGI Symbol;Acc:MGI:2445125]	chr11:46810800-46844332|+	12.9654	8.83402	0.506913	0.00641116	413.461
ENSMUSG00000060904	Arl1	ADP-ribosylation factor-like 1 [Source:MGI Symbol;Acc:MGI:99436]	chr10:88730858-88744094|+	31.0789	21.2049	0.505557	0.00251662	1204.21
ENSMUSG00000034101	Ctnnd1	catenin (cadherin associated protein), delta 1 [Source:MGI Symbol;Acc:MGI:105100]	chr2:84600071-84650765|-	5.26675	3.59675	0.503728	0.00798541	430.555
ENSMUSG00000021540	Smad5	SMAD family member 5 [Source:MGI Symbol;Acc:MGI:1328787]	chr13:56703010-56742377|+	3.15227	2.14786	0.502858	0.0310635	307.706
ENSMUSG00000047881	Rell1	RELT-like 1 [Source:MGI Symbol;Acc:MGI:2140767]	chr5:63908897-63968897|-	23.8626	16.3171	0.502504	0.000992	1195.86
ENSMUSG00000040043	Rbms2	RNA binding motif, single stranded interacting protein 2 [Source:MGI Symbol;Acc:MGI:1861776]	chr10:128131558-128180297|-	6.04161	4.12695	0.501346	0.00844067	462.647
ENSMUSG00000025508	Rplp2	ribosomal protein, large P2 [Source:MGI Symbol;Acc:MGI:1914436]	chr7:141447370-141451585|+	8.69056	5.90827	0.500567	0.062778	473.892
ENSMUSG00000024188	Luc7l	Luc7-like [Source:MGI Symbol;Acc:MGI:1914228]	chr17:26252910-26285504|+	1.97569	1.35457	0.500516	0.0104015	254.286
ENSMUSG00000024065	Ehd3	EH-domain containing 3 [Source:MGI Symbol;Acc:MGI:1928900]	chr17:73804841-73832093|+	3.91435	2.6674	0.495446	0.0922973	229.068
ENSMUSG00000029560	Snx8	sorting nexin 8 [Source:MGI Symbol;Acc:MGI:2443816]	chr5:140340299-140389262|-	3.36502	2.3064	0.494495	0.0455224	243.374
ENSMUSG00000058022	Adtrp	androgen dependent TFPI regulating protein [Source:MGI Symbol;Acc:MGI:1924596]	chr13:41763148-41847684|-	6.19716	4.24168	0.493602	0.0120175	253.47
ENSMUSG00000036285	Noa1	nitric oxide associated 1 [Source:MGI Symbol;Acc:MGI:1914306]	chr5:77294182-77310084|-	7.11475	4.87143	0.493543	0.0228363	386.465
ENSMUSG00000038806	Sde2	SDE2 telomere maintenance homolog (S. pombe) [Source:MGI Symbol;Acc:MGI:2384788]	chr1:180851127-180868113|+	4.18756	2.86059	0.489774	0.0169041	231.651
ENSMUSG00000022967	Ifnar1	interferon (alpha and beta) receptor 1 [Source:MGI Symbol;Acc:MGI:107658]	chr16:91485238-91507441|+	5.13328	3.54611	0.489294	0.0037603	391.773
ENSMUSG00000073468	Sft2d1	SFT2 domain containing 1 [Source:MGI Symbol;Acc:MGI:1918689]	chr17:8311102-8396852|+	9.29596	6.40752	0.488445	0.0329666	317.315
ENSMUSG00000067928	Zfp760	zinc finger protein 760 [Source:MGI Symbol;Acc:MGI:2679257]	chr17:21707741-21725636|+	3.75878	2.60141	0.488022	0.0183589	241.327
ENSMUSG00000027636	Sla2	Src-like-adaptor 2 [Source:MGI Symbol;Acc:MGI:1925049]	chr2:156872457-156887192|-	6.53134	4.48603	0.487892	0.0180697	273.052
ENSMUSG00000052566	Hook2	hook microtubule tethering protein 2 [Source:MGI Symbol;Acc:MGI:2181664]	chr8:84990603-85003349|+	4.46635	3.07766	0.487529	0.0542481	258.601
ENSMUSG00000042105	Inpp5f	inositol polyphosphate-5-phosphatase F [Source:MGI Symbol;Acc:MGI:2141867]	chr7:128611328-128696425|+	7.16719	4.95204	0.487442	0.00305067	749.041
ENSMUSG00000029657	Hsph1	heat shock 105kDa/110kDa protein 1 [Source:MGI Symbol;Acc:MGI:105053]	chr5:149614287-149636376|-	47.6556	33.0087	0.48675	0.00139415	5111.45
ENSMUSG00000021357	Exoc2	exocyst complex component 2 [Source:MGI Symbol;Acc:MGI:1913732]	chr13:30813919-30974093|-	7.25961	5.0341	0.486569	8.56e-05	785.168
ENSMUSG00000030256	Bhlhe41	basic helix-loop-helix family, member e41 [Source:MGI Symbol;Acc:MGI:1930704]	chr6:145858243-145865558|-	4.74706	3.26807	0.485181	0.0283853	472.016
ENSMUSG00000048833	Slc39a9	solute carrier family 39 (zinc transporter), member 9 [Source:MGI Symbol;Acc:MGI:1914820]	chr12:80643883-80683342|+	3.34721	2.3018	0.485116	0.0977966	338.319
ENSMUSG00000049792	Bag5	BCL2-associated athanogene 5 [Source:MGI Symbol;Acc:MGI:1917619]	chr12:111709488-111713257|-	4.31546	2.97814	0.484638	0.0327718	155.575
ENSMUSG00000030911	Zp2	zona pellucida glycoprotein 2 [Source:MGI Symbol;Acc:MGI:99214]	chr7:120126772-120145291|-	118.72	82.4901	0.484145	6.81e-07	6512.58
ENSMUSG00000030536	Iqgap1	IQ motif containing GTPase activating protein 1 [Source:MGI Symbol;Acc:MGI:1352757]	chr7:80711583-80825974|-	1.57375	1.09062	0.484143	0.0182725	434.644
ENSMUSG00000029248	Thegl	theg spermatid protein like [Source:MGI Symbol;Acc:MGI:1919118]	chr5:77016023-77061529|+	7.87142	5.42503	0.483928	0.0586891	232.636
ENSMUSG00000037490	Slc2a12	solute carrier family 2 (facilitated glucose transporter), member 12 [Source:MGI Symbol;Acc:MGI:3052471]	chr10:22645011-22704285|+	4.34272	2.98903	0.482926	0.0509822	256.437
ENSMUSG00000027281	Slx4ip	SLX4 interacting protein [Source:MGI Symbol;Acc:MGI:1921493]	chr2:136891218-137071950|+	22.1914	15.4307	0.481855	0.000164	1716.03
ENSMUSG00000022286	Grhl2	grainyhead-like 2 (Drosophila) [Source:MGI Symbol;Acc:MGI:2182543]	chr15:37233036-37363569|+	2.12105	1.46275	0.481829	0.0230128	176.054
ENSMUSG00000026049	Tex30	testis expressed 30 [Source:MGI Symbol;Acc:MGI:1922873]	chr1:44086613-44102441|-	9.15273	6.33739	0.48147	0.0235842	304.515
ENSMUSG00000024087	Cyp1b1	cytochrome P450, family 1, subfamily b, polypeptide 1 [Source:MGI Symbol;Acc:MGI:88590]	chr17:79706953-79715041|-	2.346	1.62478	0.48061	0.0528142	134.464
ENSMUSG00000070520	Nsmce3	NSE3 homolog, SMC5-SMC6 complex component [Source:MGI Symbol;Acc:MGI:1913897]	chr7:64867052-64872997|-	9.71622	6.78245	0.479963	4.85e-05	750.015
ENSMUSG00000094284	Vmn1r112	vomeronasal 1 receptor 112 [Source:MGI Symbol;Acc:MGI:3649076]	chr7:20771185-20772078|+	26.243	18.2041	0.478729	0.0469159	330.967
ENSMUSG00000035776	Cd99l2	CD99 antigen-like 2 [Source:MGI Symbol;Acc:MGI:2177151]	chrX:71420060-71492849|-	8.4149	5.85334	0.477769	0.00739283	503.863
ENSMUSG00000031022	BC051019	cDNA sequence BC051019 [Source:MGI Symbol;Acc:MGI:1928824]	chr7:109712181-109723850|-	12.1241	8.46378	0.474802	0.0424243	273.044
ENSMUSG00000095619	Vmn1r157	vomeronasal 1 receptor 157 [Source:MGI Symbol;Acc:MGI:3646139]	chr7:22761697-22762590|+	35.944	25.0525	0.474136	0.0342975	461.677
ENSMUSG00000029681	Bcl7b	B cell CLL/lymphoma 7B [Source:MGI Symbol;Acc:MGI:1332238]	chr5:135168283-135181855|+	11.1975	7.76674	0.474084	0.0918661	310.66
ENSMUSG00000040731	Eif4h	eukaryotic translation initiation factor 4H [Source:MGI Symbol;Acc:MGI:1341822]	chr5:134619721-134639490|-	18.0315	12.5844	0.473797	0.0117517	1085.23
ENSMUSG00000070345	Hsf5	heat shock transcription factor family member 5 [Source:MGI Symbol;Acc:MGI:2685585]	chr11:87617164-87659542|+	10.4497	7.31079	0.471939	0.00214058	592.831
ENSMUSG00000023004	Tuba1b	tubulin, alpha 1B [Source:MGI Symbol;Acc:MGI:107804]	chr15:98931425-98934565|-	44.2924	30.844	0.471909	0.0453602	1528.01
ENSMUSG00000072235	Tuba1a	tubulin, alpha 1A [Source:MGI Symbol;Acc:MGI:98869]	chr15:98949841-98953551|-	16.0979	11.1804	0.470875	0.066618	648.358
ENSMUSG00000039994	Timeless	timeless circadian clock 1 [Source:MGI Symbol;Acc:MGI:1321393]	chr10:128232065-128252941|+	14.4591	10.1118	0.469563	0.00751593	1492.21
ENSMUSG00000035671	Zswim4	zinc finger SWIM-type containing 4 [Source:MGI Symbol;Acc:MGI:2443726]	chr8:84210678-84237055|-	6.88613	4.82397	0.469228	0.0165807	483.507
ENSMUSG00000021906	Oxnad1	oxidoreductase NAD-binding domain containing 1 [Source:MGI Symbol;Acc:MGI:1916953]	chr14:32085374-32103202|+	1.58076	1.09744	0.468325	0.0892535	154.99
ENSMUSG00000031922	Cep57	centrosomal protein 57 [Source:MGI Symbol;Acc:MGI:1915551]	chr9:13807792-13827107|-	5.41518	3.77689	0.466028	0.08924	398.603
ENSMUSG00000067702	Tuba3a	tubulin, alpha 3A [Source:MGI Symbol;Acc:MGI:1095406]	chr6:125278274-125286042|-	33.12	23.1666	0.465259	0.0332521	1087.05
ENSMUSG00000034310	Tmem132d	transmembrane protein 132D [Source:MGI Symbol;Acc:MGI:3044963]	chr5:127781630-128433077|-	2.68917	1.88229	0.465193	0.038159	253.48
ENSMUSG00000037933	Bicd2	bicaudal D homolog 2 (Drosophila) [Source:MGI Symbol;Acc:MGI:1924145]	chr13:49341585-49387026|+	12.3749	8.70551	0.464568	2.61e-05	1331.46
ENSMUSG00000055302	Mrfap1	Morf4 family associated protein 1 [Source:MGI Symbol;Acc:MGI:1914818]	chr5:36794867-36796772|-	16.3235	11.452	0.464423	0.00174615	662.062
ENSMUSG00000043091	Tuba1c	tubulin, alpha 1C [Source:MGI Symbol;Acc:MGI:1095409]	chr15:99029891-99038105|+	55.2351	38.6793	0.464363	0.0447414	2307.74
ENSMUSG00000087403	Kantr	Kdm5c adjacent non-coding transcript [Source:MGI Symbol;Acc:MGI:1920247]	chrX:152294828-152327495|-	11.8691	8.33818	0.461421	0.0397644	909.585
ENSMUSG00000039458	Mtmr12	myotubularin related protein 12 [Source:MGI Symbol;Acc:MGI:2443034]	chr15:12205028-12272240|+	4.11373	2.87876	0.460749	0.0253417	267.247
ENSMUSG00000030386	Zfp606	zinc finger protein 606 [Source:MGI Symbol;Acc:MGI:1914620]	chr7:12478293-12496235|+	1.84967	1.29616	0.460089	0.067183	181.711
ENSMUSG00000058558	Rpl5	ribosomal protein L5 [Source:MGI Symbol;Acc:MGI:102854]	chr5:107900502-107909005|+	22.589	15.9433	0.459657	0.00351231	2706.49
ENSMUSG00000089862	Umad1	UMAP1-MVP12 associated (UMA) domain containing 1 [Source:MGI Symbol;Acc:MGI:3840148]	chr6:8259288-8459470|+	2.8343	1.99492	0.458519	0.0310419	204.395
ENSMUSG00000031545	Gpat4	glycerol-3-phosphate acyltransferase 4 [Source:MGI Symbol;Acc:MGI:2142716]	chr8:23171265-23208346|-	5.65155	4.00374	0.457385	0.00179592	552.667
ENSMUSG00000038151	Prdm1	PR domain containing 1, with ZNF domain [Source:MGI Symbol;Acc:MGI:99655]	chr10:44437177-44528501|-	19.9332	14.0891	0.45696	0.00157837	1578.96
ENSMUSG00000039395	Mreg	melanoregulin [Source:MGI Symbol;Acc:MGI:2151839]	chr1:72159442-72212307|-	9.00307	6.35105	0.455732	0.0178223	274.601
ENSMUSG00000022427	Tomm22	translocase of outer mitochondrial membrane 22 homolog (yeast) [Source:MGI Symbol;Acc:MGI:2450248]	chr15:79670861-79672862|+	17.083	12.02	0.455237	0.0673034	551.755
ENSMUSG00000002428	Hltf	helicase-like transcription factor [Source:MGI Symbol;Acc:MGI:1196437]	chr3:20057811-20118490|+	4.55356	3.20906	0.45342	0.0527841	446.125
ENSMUSG00000074061	Fbxw19	F-box and WD-40 domain protein 19 [Source:MGI Symbol;Acc:MGI:3505706]	chr9:109476654-109495875|-	122.611	87.1191	0.453024	3.37e-10	6960.71
ENSMUSG00000029642	Polr1d	polymerase (RNA) I polypeptide D [Source:MGI Symbol;Acc:MGI:108403]	chr5:147077050-147111597|+	24.2977	17.2166	0.452661	0.000742	1366.56
ENSMUSG00000045322	Tlr9	toll-like receptor 9 [Source:MGI Symbol;Acc:MGI:1932389]	chr9:106222598-106226883|+	12.952	9.15087	0.45103	0.0445949	584.447
ENSMUSG00000021871	Pnp	purine-nucleoside phosphorylase [Source:MGI Symbol;Acc:MGI:97365]	chr14:50944302-50965237|+	15.9063	11.2573	0.450803	0.0264032	703.488
ENSMUSG00000028243	Ubxn2b	UBX domain protein 2B [Source:MGI Symbol;Acc:MGI:1915303]	chr4:6191098-6221688|+	2.64709	1.86695	0.450236	0.0709687	279.009
ENSMUSG00000033589	Reep4	receptor accessory protein 4 [Source:MGI Symbol;Acc:MGI:1919799]	chr14:70545251-70548933|+	11.3547	8.06225	0.448432	0.0279303	259.013
ENSMUSG00000026021	Sumo1	small ubiquitin-like modifier 1 [Source:MGI Symbol;Acc:MGI:1197010]	chr1:59586558-59670834|-	29.3111	20.9174	0.447057	0.000224	1322.94
ENSMUSG00000034190	Chmp7	charged multivesicular body protein 7 [Source:MGI Symbol;Acc:MGI:1913922]	chr14:69716979-69732570|-	10.2287	7.25676	0.444871	0.0144575	454.733
ENSMUSG00000029204	Rhoh	ras homolog family member H [Source:MGI Symbol;Acc:MGI:1921984]	chr5:65861213-65896700|+	3.97145	2.84389	0.444736	0.00136818	512.964
ENSMUSG00000031264	Btk	Bruton agammaglobulinemia tyrosine kinase [Source:MGI Symbol;Acc:MGI:88216]	chrX:134542336-134583570|-	8.38598	5.95351	0.444166	0.0427123	417.887
ENSMUSG00000054753	AU018091	expressed sequence AU018091 [Source:MGI Symbol;Acc:MGI:2142124]	chr7:3154658-3169203|-	8.05588	5.75109	0.443532	0.0316566	367.786
ENSMUSG00000021079	Timm9	translocase of inner mitochondrial membrane 9 [Source:MGI Symbol;Acc:MGI:1353436]	chr12:71123173-71136684|-	11.2566	8.03624	0.441978	0.00564391	956.037
ENSMUSG00000022913	Psmg1	proteasome (prosome, macropain) assembly chaperone 1 [Source:MGI Symbol;Acc:MGI:1860263]	chr16:95979933-95990960|-	13.6713	9.72577	0.437441	0.0684544	353.167
ENSMUSG00000028479	Gne	glucosamine (UDP-N-acetyl)-2-epimerase/N-acetylmannosamine kinase [Source:MGI Symbol;Acc:MGI:1354951]	chr4:44034075-44084177|-	2.77866	1.97319	0.436237	0.0972398	245.82
ENSMUSG00000047030	Spata2	spermatogenesis associated 2 [Source:MGI Symbol;Acc:MGI:2146885]	chr2:167481133-167492887|-	15.3292	11.0237	0.435835	0.000937	1054.92
ENSMUSG00000020407	Upp1	uridine phosphorylase 1 [Source:MGI Symbol;Acc:MGI:1097668]	chr11:9118103-9136170|+	5.28943	3.78529	0.435681	0.0243472	642.068
ENSMUSG00000050240	Hic2	hypermethylated in cancer 2 [Source:MGI Symbol;Acc:MGI:1929869]	chr16:17233572-17263430|+	7.10686	5.10131	0.435442	0.00968348	705.109
ENSMUSG00000035725	Prkx	protein kinase, X-linked [Source:MGI Symbol;Acc:MGI:1309999]	chrX:77761411-77796278|-	2.90284	2.07203	0.435372	0.0557863	259.429
ENSMUSG00000030168	Adipor2	adiponectin receptor 2 [Source:MGI Symbol;Acc:MGI:93830]	chr6:119353150-119417704|-	1.9569	1.40454	0.435351	0.0501048	219.119
ENSMUSG00000025938	Slco5a1	solute carrier organic anion transporter family, member 5A1 [Source:MGI Symbol;Acc:MGI:2443431]	chr1:12866549-12992650|-	2.51196	1.8015	0.434723	0.0122244	577.494
ENSMUSG00000024725	Ostf1	osteoclast stimulating factor 1 [Source:MGI Symbol;Acc:MGI:700012]	chr19:18579328-18631789|-	4.37544	3.15274	0.433688	0.0332521	323.401
ENSMUSG00000074731	Zfp345	zinc finger protein 345 [Source:MGI Symbol;Acc:MGI:3652219]	chr2:150470991-150485091|-	20.4584	14.6959	0.432584	0.0294112	831.628
ENSMUSG00000095677	Dynlt1f	dynein light chain Tctex-type 1F [Source:MGI Symbol;Acc:MGI:3780996]	chr17:6648941-6655939|-	39.4521	28.2832	0.431721	0.0127769	475.427
ENSMUSG00000022899	Slc15a2	solute carrier family 15 (H+/peptide transporter), member 2 [Source:MGI Symbol;Acc:MGI:1890457]	chr16:36750178-36784962|-	2.65838	1.90623	0.431556	0.0961499	237.733
ENSMUSG00000032480	Dhx30	DEAH (Asp-Glu-Ala-His) box polypeptide 30 [Source:MGI Symbol;Acc:MGI:1920081]	chr9:110084320-110117830|-	2.23995	1.60753	0.428654	0.00944092	379.231
ENSMUSG00000071340	Trappc3l	trafficking protein particle complex 3 like [Source:MGI Symbol;Acc:MGI:3642034]	chr10:34037597-34109815|+	18.912	13.6246	0.428535	0.00497024	403.943
ENSMUSG00000018583	G3bp1	GTPase activating protein (SH3 domain) binding protein 1 [Source:MGI Symbol;Acc:MGI:1351465]	chr11:55469685-55504838|+	2.45085	1.7606	0.426571	0.0282885	281.793
ENSMUSG00000070780	Rbm47	RNA binding motif protein 47 [Source:MGI Symbol;Acc:MGI:2384294]	chr5:66016549-66173118|-	3.05317	2.2048	0.424427	0.0632555	297.715
ENSMUSG00000040250	Ints13	integrator complex subunit 13 [Source:MGI Symbol;Acc:MGI:1918427]	chr6:146549632-146577835|-	5.8179	4.21537	0.422364	0.000619	777.652
ENSMUSG00000045658	Pid1	phosphotyrosine interaction domain containing 1 [Source:MGI Symbol;Acc:MGI:2138391]	chr1:84036296-84364180|-	4.61853	3.3358	0.421818	0.013776	481.297
ENSMUSG00000002017	Fam98a	family with sequence similarity 98, member A [Source:MGI Symbol;Acc:MGI:1919972]	chr17:75537086-75551946|-	22.6748	16.4207	0.419068	0.0649737	1469.33
ENSMUSG00000040760	Appl1	adaptor protein, phosphotyrosine interaction, PH domain and leucine zipper containing 1 [Source:MGI Symbol;Acc:MGI:1920243]	chr14:26918988-26971232|-	28.7296	20.846	0.417882	0.0246524	3713.97
ENSMUSG00000040289	Hey1	hairy/enhancer-of-split related with YRPW motif 1 [Source:MGI Symbol;Acc:MGI:1341800]	chr3:8663359-8667256|-	7.4694	5.43703	0.417135	0.0880606	376.076
ENSMUSG00000062762	Ei24	etoposide induced 2.4 mRNA [Source:MGI Symbol;Acc:MGI:108090]	chr9:36779159-36797393|-	5.10831	3.70525	0.415067	0.0682417	377.171
ENSMUSG00000042447	Mios	missing oocyte, meiosis regulator, homolog (Drosophila) [Source:MGI Symbol;Acc:MGI:2182066]	chr6:8209222-8236274|+	2.21533	1.6062	0.414215	0.0551055	281.179
ENSMUSG00000041642	Kif21b	kinesin family member 21B [Source:MGI Symbol;Acc:MGI:109234]	chr1:136131389-136177998|+	2.16034	1.57327	0.412842	0.0140298	382.64
ENSMUSG00000028583	Pdpn	podoplanin [Source:MGI Symbol;Acc:MGI:103098]	chr4:143267431-143299564|-	31.3848	22.7922	0.412687	0.0712789	971.184
ENSMUSG00000020076	Ddx50	DEAD (Asp-Glu-Ala-Asp) box polypeptide 50 [Source:MGI Symbol;Acc:MGI:2182303]	chr10:62615895-62651218|-	2.76794	2.01634	0.412425	0.0291053	477.537
ENSMUSG00000034573	Ptpn13	protein tyrosine phosphatase, non-receptor type 13 [Source:MGI Symbol;Acc:MGI:103293]	chr5:103425192-103598303|+	5.52384	4.01581	0.411011	0.0906687	935.687
ENSMUSG00000032314	Etfa	electron transferring flavoprotein, alpha polypeptide [Source:MGI Symbol;Acc:MGI:106092]	chr9:55454508-55512243|-	60.1595	43.976	0.409137	0.00192339	1574.64
ENSMUSG00000012428	Steap4	STEAP family member 4 [Source:MGI Symbol;Acc:MGI:1923560]	chr5:7960457-7982213|+	10.4045	7.59542	0.408386	0.050302	338.902
ENSMUSG00000047419	Cmya5	cardiomyopathy associated 5 [Source:MGI Symbol;Acc:MGI:1923719]	chr13:93040713-93144724|-	10.6305	7.78864	0.407649	2.94e-06	1905.62
ENSMUSG00000048279	Sacs	sacsin [Source:MGI Symbol;Acc:MGI:1354724]	chr14:61138457-61240695|+	2.1851	1.59725	0.407359	0.0448094	681.717
ENSMUSG00000002844	Adprh	ADP-ribosylarginine hydrolase [Source:MGI Symbol;Acc:MGI:1098234]	chr16:38445399-38452689|-	13.6646	10.0173	0.406444	0.0235842	336.659
ENSMUSG00000045427	Hnrnph2	heterogeneous nuclear ribonucleoprotein H2 [Source:MGI Symbol;Acc:MGI:1201779]	chrX:134601179-134607060|+	4.83887	3.5323	0.405246	0.0215479	336.91
ENSMUSG00000021216	Tubal3	tubulin, alpha-like 3 [Source:MGI Symbol;Acc:MGI:3588215]	chr13:3918274-3935277|+	22.54	16.5784	0.39889	0.00735359	1084.48
ENSMUSG00000073471	Rsph3a	radial spoke 3A homolog (Chlamydomonas) [Source:MGI Symbol;Acc:MGI:1914082]	chr17:7945653-7979824|+	10.8507	7.9732	0.398403	0.0462693	523.352
ENSMUSG00000036568	Gltscr1l	GLTSCR1-like [Source:MGI Symbol;Acc:MGI:2673855]	chr17:46798116-46831413|-	7.00644	5.1548	0.398159	0.0523107	617.566
ENSMUSG00000026289	Atg16l1	autophagy related 16-like 1 (S. cerevisiae) [Source:MGI Symbol;Acc:MGI:1924290]	chr1:87755870-87792428|+	8.977	6.60425	0.397399	0.0782913	900.902
ENSMUSG00000002578	Ikzf4	IKAROS family zinc finger 4 [Source:MGI Symbol;Acc:MGI:1343139]	chr10:128630843-128645991|-	26.6392	19.647	0.397351	0.001284	2316.8
ENSMUSG00000039910	Cited2	Cbp/p300-interacting transactivator, with Glu/Asp-rich carboxy-terminal domain, 2 [Source:MGI Symbol;Acc:MGI:1306784]	chr10:17723218-17725674|+	66.7356	49.2646	0.394672	0.0242916	2360.72
ENSMUSG00000026150	Mff	mitochondrial fission factor [Source:MGI Symbol;Acc:MGI:1922984]	chr1:82724890-82752394|+	20.8825	15.4348	0.394086	0.000345	3023.14
ENSMUSG00000041837	Pdcd7	programmed cell death 7 [Source:MGI Symbol;Acc:MGI:1859170]	chr9:65346104-65359643|+	59.9002	44.2879	0.392693	0.00690471	2304.27
ENSMUSG00000026770	Il2ra	interleukin 2 receptor, alpha chain [Source:MGI Symbol;Acc:MGI:96549]	chr2:11642807-11693193|+	3.51047	2.5892	0.392331	0.0644224	305.148
ENSMUSG00000017548	Suz12	suppressor of zeste 12 homolog (Drosophila) [Source:MGI Symbol;Acc:MGI:1261758]	chr11:79993106-80034123|+	107.15	79.3952	0.391219	0.00193446	7438.96
ENSMUSG00000032410	Xrn1	5'-3' exoribonuclease 1 [Source:MGI Symbol;Acc:MGI:891964]	chr9:95954760-96057803|+	3.9028	2.88312	0.390857	0.00702742	1002.94
ENSMUSG00000045083	Lingo2	leucine rich repeat and Ig domain containing 2 [Source:MGI Symbol;Acc:MGI:2442298]	chr4:35706647-36951747|-	8.516	6.28524	0.390702	0.0478966	1080.18
ENSMUSG00000039844	Rapgef1	Rap guanine nucleotide exchange factor (GEF) 1 [Source:MGI Symbol;Acc:MGI:104580]	chr2:29619720-29740978|+	6.77373	5.01481	0.390034	0.0233546	886.703
ENSMUSG00000028640	Tfap2c	transcription factor AP-2, gamma [Source:MGI Symbol;Acc:MGI:106032]	chr2:172549593-172558622|+	14.3308	10.6253	0.389257	0.0370636	716.935
ENSMUSG00000027018	Hat1	histone aminotransferase 1 [Source:MGI Symbol;Acc:MGI:96013]	chr2:71388958-71441622|+	22.3496	16.599	0.387929	0.00241079	991.801
ENSMUSG00000036693	Nop14	NOP14 nucleolar protein [Source:MGI Symbol;Acc:MGI:1922666]	chr5:34638536-34660148|-	20.8406	15.4324	0.387877	0.0779426	749.354
ENSMUSG00000061393	Acvr2b	activin receptor IIB [Source:MGI Symbol;Acc:MGI:87912]	chr9:119402118-119434995|+	4.15161	3.06761	0.387657	0.0743259	194.719
ENSMUSG00000030265	Kras	Kirsten rat sarcoma viral oncogene homolog [Source:MGI Symbol;Acc:MGI:96680]	chr6:145216699-145250239|-	16.623	12.3523	0.386267	0.0243472	1490.67
ENSMUSG00000004843	Chmp2b	charged multivesicular body protein 2B [Source:MGI Symbol;Acc:MGI:1916192]	chr16:65539133-65562697|-	8.46605	6.24255	0.384487	0.0876926	241.574
ENSMUSG00000019992	Mtfr2	mitochondrial fission regulator 2 [Source:MGI Symbol;Acc:MGI:1919054]	chr10:20347770-20361304|+	22.0725	16.4059	0.383766	0.00627572	625.386
ENSMUSG00000038902	Pogz	pogo transposable element with ZNF domain [Source:MGI Symbol;Acc:MGI:2442117]	chr3:94837567-94882326|+	16.5429	12.3333	0.382901	2.64e-06	2307.92
ENSMUSG00000001270	Ckb	creatine kinase, brain [Source:MGI Symbol;Acc:MGI:88407]	chr12:111669361-111672338|-	26.5257	19.7349	0.382586	0.0998383	1191.88
ENSMUSG00000064368	mt-Nd6	mitochondrially encoded NADH dehydrogenase 6 [Source:MGI Symbol;Acc:MGI:102495]	chrM:13552-14070|-	542.306	404.592	0.381537	0.0204318	4054.69
ENSMUSG00000047045	Tmem164	transmembrane protein 164 [Source:MGI Symbol;Acc:MGI:2148020]	chrX:142681406-142843494|+	12.9604	9.66914	0.381391	0.000275	1184.13
ENSMUSG00000021709	Erbin	Erbb2 interacting protein [Source:MGI Symbol;Acc:MGI:1890169]	chr13:103818787-103920514|-	3.56772	2.66621	0.380744	0.0743259	425.909
ENSMUSG00000026566	Mpzl1	myelin protein zero-like 1 [Source:MGI Symbol;Acc:MGI:1915731]	chr1:165592240-165634538|-	19.0831	14.2322	0.379813	0.0116156	1145.59
ENSMUSG00000032757	Bet1	Bet1 golgi vesicular membrane trafficking protein [Source:MGI Symbol;Acc:MGI:1343104]	chr6:4076899-4086972|-	7.47222	5.57146	0.379076	0.0310008	415.255
ENSMUSG00000010914	Pdhx	pyruvate dehydrogenase complex, component X [Source:MGI Symbol;Acc:MGI:1351627]	chr2:103021075-103073513|-	24.5181	18.3353	0.377978	0.000466	1698.06
ENSMUSG00000036815	Dpp10	dipeptidylpeptidase 10 [Source:MGI Symbol;Acc:MGI:2442409]	chr1:123321471-124045559|-	3.82068	2.85475	0.377586	0.000886	849.493
ENSMUSG00000027387	Zc3h8	zinc finger CCCH type containing 8 [Source:MGI Symbol;Acc:MGI:1930128]	chr2:128926268-128944077|-	18.5912	13.9104	0.376678	0.0248379	438.898
ENSMUSG00000037443	Cep85	centrosomal protein 85 [Source:MGI Symbol;Acc:MGI:1917262]	chr4:134129858-134187112|-	9.848	7.36242	0.376241	0.00163495	757.859
ENSMUSG00000019794	Katna1	katanin p60 (ATPase-containing) subunit A1 [Source:MGI Symbol;Acc:MGI:1344353]	chr10:7726000-7763150|+	17.6534	13.206	0.375442	0.0227513	593.354
ENSMUSG00000030057	Cnbp	cellular nucleic acid binding protein [Source:MGI Symbol;Acc:MGI:88431]	chr6:87842615-87851106|-	102.802	76.9734	0.374843	0.0136524	3962.9
ENSMUSG00000021771	Vdac2	voltage-dependent anion channel 2 [Source:MGI Symbol;Acc:MGI:106915]	chr14:21831269-21845879|+	12.495	9.37748	0.370594	0.0564732	1003.55
ENSMUSG00000030203	Dusp16	dual specificity phosphatase 16 [Source:MGI Symbol;Acc:MGI:1917936]	chr6:134715468-134792625|-	4.47853	3.36332	0.368219	0.0357928	641.406
ENSMUSG00000044477	Zfand3	zinc finger, AN1-type domain 3 [Source:MGI Symbol;Acc:MGI:1096572]	chr17:30005087-30210019|+	42.5412	32.015	0.367607	0.0023907	1457.62
ENSMUSG00000024097	Srsf7	serine/arginine-rich splicing factor 7 [Source:MGI Symbol;Acc:MGI:1926232]	chr17:80200089-80207305|-	16.1243	12.1791	0.366415	0.018268	496.321
ENSMUSG00000033909	Usp36	ubiquitin specific peptidase 36 [Source:MGI Symbol;Acc:MGI:1919594]	chr11:118259651-118290244|-	5.13334	3.85646	0.366414	0.0596856	600.275
ENSMUSG00000018481	Appbp2	amyloid beta precursor protein (cytoplasmic tail) binding protein 2 [Source:MGI Symbol;Acc:MGI:1914134]	chr11:85187262-85235130|-	10.9273	8.22761	0.366073	0.0510931	1112.64
ENSMUSG00000032216	Nedd4	neural precursor cell expressed, developmentally down-regulated 4 [Source:MGI Symbol;Acc:MGI:97297]	chr9:72662346-72749852|+	3.5356	2.67475	0.361382	0.0367554	572.546
ENSMUSG00000036822	Topors	topoisomerase I binding, arginine/serine-rich [Source:MGI Symbol;Acc:MGI:2146189]	chr4:40259601-40269850|-	26.1053	19.7244	0.361374	0.00720348	1425.27
ENSMUSG00000054770	Kctd18	potassium channel tetramerisation domain containing 18 [Source:MGI Symbol;Acc:MGI:3603813]	chr1:57955101-58018956|-	2.11164	1.59952	0.360123	0.0395082	307.648
ENSMUSG00000073481	2018-03-02	mitochondrial amidoxime reducing component 2 [Source:MGI Symbol;Acc:MGI:1914497]	chr1:184813068-184846451|-	8.64215	6.54477	0.358431	0.00433701	754.893
ENSMUSG00000040945	Rcc2	regulator of chromosome condensation 2 [Source:MGI Symbol;Acc:MGI:1919784]	chr4:140700541-140723220|+	22.4936	17.0751	0.357075	0.00831699	1445.29
ENSMUSG00000032625	Thsd7a	thrombospondin, type I, domain containing 7A [Source:MGI Symbol;Acc:MGI:2685683]	chr6:12311610-12749410|-	8.07421	6.12992	0.356149	0.0102772	1648.88
ENSMUSG00000071708	Sms	spermine synthase [Source:MGI Symbol;Acc:MGI:109490]	chrX:157443855-157492287|-	46.3428	35.2092	0.355528	0.000565	4270.56
ENSMUSG00000035762	Tmem161b	transmembrane protein 161B [Source:MGI Symbol;Acc:MGI:1919995]	chr13:84222314-84295870|+	11.4464	8.67173	0.352431	0.0999001	405.529
ENSMUSG00000036513	Commd2	COMM domain containing 2 [Source:MGI Symbol;Acc:MGI:1098806]	chr3:57644349-57651715|-	19.6316	14.9314	0.35165	0.0322299	1015.78
ENSMUSG00000074194	Zfp791	zinc finger protein 791 [Source:MGI Symbol;Acc:MGI:3648473]	chr8:85108553-85123095|-	28.9747	22.0839	0.350027	0.00436606	1280.07
ENSMUSG00000026238	Ptma	prothymosin alpha [Source:MGI Symbol;Acc:MGI:97803]	chr1:86526726-86530712|+	21.4664	16.3048	0.349117	0.0307971	614.698
ENSMUSG00000040268	Plekha1	pleckstrin homology domain containing, family A (phosphoinositide binding specific) member 1 [Source:MGI Symbol;Acc:MGI:2442213]	chr7:130865756-130913312|+	6.17484	4.72051	0.347994	0.0399718	854.316
ENSMUSG00000055945	Prr18	proline rich 18 [Source:MGI Symbol;Acc:MGI:2443403]	chr17:8340406-8344112|+	16.192	12.337	0.347985	0.037681	901.832
ENSMUSG00000034762	Glis1	GLIS family zinc finger 1 [Source:MGI Symbol;Acc:MGI:2386723]	chr4:107434591-107635061|+	35.5554	27.143	0.34515	0.0320767	1610.84
ENSMUSG00000074505	Fat3	FAT atypical cadherin 3 [Source:MGI Symbol;Acc:MGI:2444314]	chr9:15910189-16501285|-	2.49721	1.9051	0.343974	0.0679212	823.412
ENSMUSG00000047731	Wbp1l	WW domain binding protein 1 like [Source:MGI Symbol;Acc:MGI:107577]	chr19:46599084-46657389|+	22.6117	17.3253	0.34388	0.000187	1488.35
ENSMUSG00000014932	Yes1	YES proto-oncogene 1, Src family tyrosine kinase [Source:MGI Symbol;Acc:MGI:99147]	chr5:32611171-32687057|+	11.0225	8.43777	0.343192	0.0588602	1055.57
ENSMUSG00000037058	Paip2	polyadenylate-binding protein-interacting protein 2 [Source:MGI Symbol;Acc:MGI:1915119]	chr18:35598617-35617186|+	61.1856	46.9961	0.339773	0.0136145	2701.84
ENSMUSG00000044948	Cfap43	cilia and flagella associated protein 43 [Source:MGI Symbol;Acc:MGI:1289258]	chr19:47737561-47919299|-	2.50218	1.91695	0.339684	0.0912005	336.514
ENSMUSG00000029569	Tmem168	transmembrane protein 168 [Source:MGI Symbol;Acc:MGI:1921794]	chr6:13580687-13608100|-	6.79565	5.21786	0.339032	0.0673034	564.964
ENSMUSG00000015671	Psma2	proteasome (prosome, macropain) subunit, alpha type 2 [Source:MGI Symbol;Acc:MGI:104885]	chr13:14613240-14674236|+	65.5689	50.3411	0.338746	0.0227414	3385.35
ENSMUSG00000046722	Cdc42se1	CDC42 small effector 1 [Source:MGI Symbol;Acc:MGI:1889510]	chr3:95228732-95236409|+	13.0039	9.98537	0.338256	0.0856825	522.078
ENSMUSG00000074221	Zfp568	zinc finger protein 568 [Source:MGI Symbol;Acc:MGI:2142347]	chr7:29983955-30028282|+	15.6253	12.0092	0.337755	0.00192339	1601.51
ENSMUSG00000031429	Psmd10	proteasome (prosome, macropain) 26S subunit, non-ATPase, 10 [Source:MGI Symbol;Acc:MGI:1858898]	chrX:140948429-140956728|-	23.1013	17.7942	0.334388	0.0457555	621.405
ENSMUSG00000036123	Slc9a3	solute carrier family 9 (sodium/hydrogen exchanger), member 3 [Source:MGI Symbol;Acc:MGI:105064]	chr13:74121457-74169442|+	14.428	11.1107	0.333426	0.0830106	1034.96
ENSMUSG00000005370	Msh6	mutS homolog 6 [Source:MGI Symbol;Acc:MGI:1343961]	chr17:87975050-87990883|+	60.8726	47.1521	0.328783	0.00230676	4132.26
ENSMUSG00000060630	Zfp735	zinc finger protein 735 [Source:MGI Symbol;Acc:MGI:1923640]	chr11:73688778-73713798|+	25.4617	19.719	0.327865	0.0463139	1436.05
ENSMUSG00000059149	Mfsd4a	major facilitator superfamily domain containing 4A [Source:MGI Symbol;Acc:MGI:2442786]	chr1:132022806-132068062|-	5.23057	4.03991	0.327532	0.095559	633.452
ENSMUSG00000093930	Hmgcs1	3-hydroxy-3-methylglutaryl-Coenzyme A synthase 1 [Source:MGI Symbol;Acc:MGI:107592]	chr13:119690462-119708086|+	131.955	102.334	0.326942	0.00312525	6588.22
ENSMUSG00000079003	Samd1	sterile alpha motif domain containing 1 [Source:MGI Symbol;Acc:MGI:2142433]	chr8:83997672-84000409|+	23.1264	17.9272	0.325452	0.0462693	696.11
ENSMUSG00000027630	Tbl1xr1	transducin (beta)-like 1X-linked receptor 1 [Source:MGI Symbol;Acc:MGI:2441730]	chr3:22076652-22216594|+	14.4147	11.1873	0.324664	0.0562119	2316.94
ENSMUSG00000026764	Kif5c	kinesin family member 5C [Source:MGI Symbol;Acc:MGI:1098269]	chr2:49619298-49774778|+	18.7224	14.5415	0.323939	8.22e-05	1957.55
ENSMUSG00000038605	Samd10	sterile alpha motif domain containing 10 [Source:MGI Symbol;Acc:MGI:2443872]	chr2:181595218-181599212|-	17.7919	13.7868	0.323461	0.0880606	692.313
ENSMUSG00000039159	Ube2h	ubiquitin-conjugating enzyme E2H [Source:MGI Symbol;Acc:MGI:104632]	chr6:30211289-30304539|-	81.1949	63.0967	0.322344	0.0219008	4144.49
ENSMUSG00000045662	Henmt1	HEN1 methyltransferase homolog 1 (Arabidopsis) [Source:MGI Symbol;Acc:MGI:1913965]	chr3:108939873-108960774|+	22.8028	17.7461	0.321634	0.0524804	849.102
ENSMUSG00000034300	Fam53c	family with sequence similarity 53, member C [Source:MGI Symbol;Acc:MGI:1913556]	chr18:34758906-34773760|+	92.0125	71.9645	0.315118	0.0445296	6475.06
ENSMUSG00000026869	Psmd5	proteasome (prosome, macropain) 26S subunit, non-ATPase, 5 [Source:MGI Symbol;Acc:MGI:1914248]	chr2:34849734-34874968|-	12.383	9.6618	0.314938	0.016729	1342.64
ENSMUSG00000022241	Tars	threonyl-tRNA synthetase [Source:MGI Symbol;Acc:MGI:106314]	chr15:11383663-11399658|-	14.3125	11.1348	0.314404	0.0815858	575.127
ENSMUSG00000032553	Srprb	signal recognition particle receptor, B subunit [Source:MGI Symbol;Acc:MGI:102964]	chr9:103188032-103202137|-	8.77171	6.84507	0.314026	0.0760813	530.002
ENSMUSG00000031012	Cask	calcium/calmodulin-dependent serine protein kinase (MAGUK family) [Source:MGI Symbol;Acc:MGI:1309489]	chrX:13517080-13851367|-	6.86619	5.36289	0.312385	0.0641939	820.178
ENSMUSG00000022744	Cldnd1	claudin domain containing 1 [Source:MGI Symbol;Acc:MGI:2447860]	chr16:58727910-58734251|+	20.5531	16.142	0.308309	0.0229541	750.448
ENSMUSG00000034297	Med13	mediator complex subunit 13 [Source:MGI Symbol;Acc:MGI:3029632]	chr11:86267033-86357602|-	23.625	18.565	0.308296	0.000311	4174.09
ENSMUSG00000038485	Socs7	suppressor of cytokine signaling 7 [Source:MGI Symbol;Acc:MGI:2651588]	chr11:97362551-97398542|+	54.0011	42.4066	0.306509	0.0692409	5845.42
ENSMUSG00000032959	Pebp1	phosphatidylethanolamine binding protein 1 [Source:MGI Symbol;Acc:MGI:1344408]	chr5:117282654-117287625|-	24.7775	19.3968	0.306344	0.0832574	1162.76
ENSMUSG00000000440	Pparg	peroxisome proliferator activated receptor gamma [Source:MGI Symbol;Acc:MGI:97747]	chr6:115360951-115490399|+	17.3857	13.6557	0.305659	0.0665788	708.379
ENSMUSG00000084883	Ccdc85c	coiled-coil domain containing 85C [Source:MGI Symbol;Acc:MGI:3644008]	chr12:108203602-108275425|-	10.8246	8.50173	0.304077	0.0871833	720.153
ENSMUSG00000030942	Thumpd1	THUMP domain containing 1 [Source:MGI Symbol;Acc:MGI:2444479]	chr7:119715093-119720798|-	50.8479	40.0216	0.303759	0.0289478	2044.73
ENSMUSG00000060373	Hnrnpc	heterogeneous nuclear ribonucleoprotein C [Source:MGI Symbol;Acc:MGI:107795]	chr14:52073380-52104028|-	46.7779	36.8479	0.302587	0.0242765	2125.27
ENSMUSG00000032883	Acsl3	acyl-CoA synthetase long-chain family member 3 [Source:MGI Symbol;Acc:MGI:1921455]	chr1:78657825-78707743|+	59.3731	46.8275	0.301296	0.0165195	3298.55
ENSMUSG00000004952	Rasa4	RAS p21 protein activator 4 [Source:MGI Symbol;Acc:MGI:1858600]	chr5:136083916-136111860|+	3.76981	2.96751	0.299323	0.0963571	914.999
ENSMUSG00000026917	Wdr5	WD repeat domain 5 [Source:MGI Symbol;Acc:MGI:2155884]	chr2:27515157-27536535|+	55.8952	44.2374	0.297401	0.000296	2861.44
ENSMUSG00000058173	Smco4	single-pass membrane protein with coiled-coil domains 4 [Source:MGI Symbol;Acc:MGI:3039636]	chr9:15493432-15545260|+	112.99	89.5668	0.292864	0.0345951	2040.24
ENSMUSG00000042043	Tbca	tubulin cofactor A [Source:MGI Symbol;Acc:MGI:107549]	chr13:94788910-94842922|+	43.3517	34.3987	0.290824	0.0332521	687.96
ENSMUSG00000027091	Zc3h15	zinc finger CCCH-type containing 15 [Source:MGI Symbol;Acc:MGI:1919747]	chr2:83644435-83664622|+	38.6317	30.7185	0.289494	0.0181096	2038.07
ENSMUSG00000040843	Tiprl	TIP41, TOR signalling pathway regulator-like (S. cerevisiae) [Source:MGI Symbol;Acc:MGI:1915087]	chr1:165212286-165236996|-	8.98942	7.14665	0.288847	0.0681589	724.368
ENSMUSG00000059956	Serpinb12	serine (or cysteine) peptidase inhibitor, clade B (ovalbumin), member 12 [Source:MGI Symbol;Acc:MGI:1919119]	chr1:106934449-106957080|+	13.5575	10.8066	0.287408	0.067183	485.392
ENSMUSG00000037492	Zmat4	zinc finger, matrin type 4 [Source:MGI Symbol;Acc:MGI:2443497]	chr8:23636019-24156585|+	7.10472	5.65554	0.287245	0.0134972	872.142
ENSMUSG00000019843	Fyn	Fyn proto-oncogene [Source:MGI Symbol;Acc:MGI:95602]	chr10:39368855-39565381|+	48.1365	38.4046	0.285623	0.01466	2962.67
ENSMUSG00000025190	Got1	glutamic-oxaloacetic transaminase 1, soluble [Source:MGI Symbol;Acc:MGI:95791]	chr19:43499752-43524605|-	16.339	13.0433	0.285312	0.032528	637.987
ENSMUSG00000038646	Fam103a1	family with sequence similarity 103, member A1 [Source:MGI Symbol;Acc:MGI:1914398]	chr7:81762925-81769491|+	79.9836	63.9633	0.283165	0.000806	2185.19
ENSMUSG00000033948	Zswim5	zinc finger SWIM-type containing 5 [Source:MGI Symbol;Acc:MGI:1921714]	chr4:116877376-116989264|+	9.50088	7.59676	0.282945	0.0578584	824.474
ENSMUSG00000055895	Oosp2	oocyte secreted protein 2 [Source:MGI Symbol;Acc:MGI:2684945]	chr19:11647279-11660559|-	83.2673	66.4174	0.282004	0.0246354	1351.75
ENSMUSG00000040007	Bahd1	bromo adjacent homology domain containing 1 [Source:MGI Symbol;Acc:MGI:2139371]	chr2:118900377-118924528|+	7.0151	5.59625	0.281788	0.0817206	451.809
ENSMUSG00000024304	Cdh2	cadherin 2 [Source:MGI Symbol;Acc:MGI:88355]	chr18:16588877-16809246|-	7.31773	5.87935	0.273729	0.0868016	856.505
ENSMUSG00000058672	Tubb2a	tubulin, beta 2A class IIA [Source:MGI Symbol;Acc:MGI:107861]	chr13:34074274-34078007|-	85.0916	68.4289	0.273669	0.0179161	2779.05
ENSMUSG00000020361	Hspa4	heat shock protein 4 [Source:MGI Symbol;Acc:MGI:1342292]	chr11:53259814-53300457|-	60.02	48.2503	0.273374	0.050493	4788.18
ENSMUSG00000057534	Elobl	elongin B-like [Source:MGI Symbol;Acc:MGI:1860403]	chr11:88964658-88966931|-	5355.04	4315.44	0.271437	0.0811613	51925
ENSMUSG00000036840	Siah1a	seven in absentia 1A [Source:MGI Symbol;Acc:MGI:108064]	chr8:86724007-86745934|-	64.5291	52.034	0.26915	0.0176991	1682.49
ENSMUSG00000030291	Med21	mediator complex subunit 21 [Source:MGI Symbol;Acc:MGI:1347064]	chr6:146642547-146650732|+	31.6124	25.4917	0.269077	0.0181895	1585.15
ENSMUSG00000068205	Macrod2	MACRO domain containing 2 [Source:MGI Symbol;Acc:MGI:1920149]	chr2:140395309-142392966|+	10.3755	8.36217	0.268711	0.0961499	1846.75
ENSMUSG00000042348	Arl15	ADP-ribosylation factor-like 15 [Source:MGI Symbol;Acc:MGI:2442308]	chr13:113794505-114157461|+	18.5877	15.0251	0.264398	0.0906329	921.071
ENSMUSG00000022195	6030458C11Rik	RIKEN cDNA 6030458C11 gene [Source:MGI Symbol;Acc:MGI:1925127]	chr15:12808177-12824657|-	32.4971	26.3638	0.264209	0.00481281	2009.82
ENSMUSG00000023066	Rttn	rotatin [Source:MGI Symbol;Acc:MGI:2179288]	chr18:88971790-89131013|+	24.8582	20.1429	0.262123	0.0820282	2836.1
ENSMUSG00000022538	Lsg1	large 60S subunit nuclear export GTPase 1 [Source:MGI Symbol;Acc:MGI:107236]	chr16:30560494-30587592|-	5.62035	4.56221	0.261846	0.08314	525.586
ENSMUSG00000047514	Tspyl1	testis-specific protein, Y-encoded-like 1 [Source:MGI Symbol;Acc:MGI:1298395]	chr10:34282190-34285275|+	21.6915	17.5859	0.260333	0.0993863	1125.98
ENSMUSG00000061048	Cdh3	cadherin 3 [Source:MGI Symbol;Acc:MGI:88356]	chr8:106510891-106557297|+	15.5437	12.625	0.25904	0.011029	881.529
ENSMUSG00000009079	Ewsr1	Ewing sarcoma breakpoint region 1 [Source:MGI Symbol;Acc:MGI:99960]	chr11:5069689-5099266|-	10.1191	8.22484	0.257175	0.0741855	865.373
ENSMUSG00000070738	Dgkd	diacylglycerol kinase, delta [Source:MGI Symbol;Acc:MGI:2138334]	chr1:87853287-87945180|+	15.0445	12.2535	0.25674	0.0587477	1565.2
ENSMUSG00000004934	Pias4	protein inhibitor of activated STAT 4 [Source:MGI Symbol;Acc:MGI:2136940]	chr10:81153266-81167923|-	13.9177	11.383	0.253599	0.07129	807.919
ENSMUSG00000037536	Fbxo34	F-box protein 34 [Source:MGI Symbol;Acc:MGI:1926188]	chr14:47472561-47531962|+	108.584	88.7355	0.251909	0.0264904	5707.01
ENSMUSG00000034075	Zdhhc5	zinc finger, DHHC domain containing 5 [Source:MGI Symbol;Acc:MGI:1923573]	chr2:84687970-84715180|-	45.404	37.1302	0.250308	0.0291053	3205.34
ENSMUSG00000032244	Fem1b	feminization 1 homolog b (C. elegans) [Source:MGI Symbol;Acc:MGI:1335087]	chr9:62791821-62811934|-	31.4451	25.7217	0.249699	0.0152187	3710.31
ENSMUSG00000022034	Esco2	establishment of sister chromatid cohesion N-acetyltransferase 2 [Source:MGI Symbol;Acc:MGI:1919238]	chr14:65819038-65833994|-	57.8535	47.3882	0.247813	0.0837558	3786.2
ENSMUSG00000071856	Mcc	mutated in colorectal cancers [Source:MGI Symbol;Acc:MGI:96930]	chr18:44425060-44812182|-	21.2712	17.4529	0.246463	0.00416446	4429.73
ENSMUSG00000042111	Ccdc115	coiled-coil domain containing 115 [Source:MGI Symbol;Acc:MGI:1916918]	chr1:34436670-34439672|-	76.4145	62.741	0.244365	0.0217498	2852.75
ENSMUSG00000029223	Uchl1	ubiquitin carboxy-terminal hydrolase L1 [Source:MGI Symbol;Acc:MGI:103149]	chr5:66676091-66687234|+	99.586	81.8141	0.243084	0.0462693	5448.1
ENSMUSG00000032966	Fkbp1a	FK506 binding protein 1a [Source:MGI Symbol;Acc:MGI:95541]	chr2:151542483-151561692|+	34.0843	28.0883	0.241139	0.0237037	1983.71
ENSMUSG00000072813	E330014E10Rik	RIKEN cDNA E330014E10 gene [Source:MGI Symbol;Acc:MGI:3615333]	chr5:95775990-95804708|+	250.81	206.607	0.241054	0.0193915	9258.99
ENSMUSG00000070677	D5Ertd577e	DNA segment, Chr 5, ERATO Doi 577, expressed [Source:MGI Symbol;Acc:MGI:1261918]	chr5:95456806-95485587|+	223.843	184.74	0.238634	0.016057	8466.05
ENSMUSG00000015721	Nlrp5	NLR family, pyrin domain containing 5 [Source:MGI Symbol;Acc:MGI:1345193]	chr7:23385889-23441922|+	210.869	174.122	0.23634	0.00844067	16425.8
ENSMUSG00000085079	Khdc1b	KH domain containing 1B [Source:MGI Symbol;Acc:MGI:2138477]	chr1:21383556-21386373|+	895.943	739.748	0.235231	0.0243085	35727.1
ENSMUSG00000052798	Nup107	nucleoporin 107 [Source:MGI Symbol;Acc:MGI:2143854]	chr10:117750621-117792705|-	48.9907	40.5173	0.233815	0.0354909	2838.26
ENSMUSG00000039936	Pik3cd	phosphatidylinositol 3-kinase catalytic delta polypeptide [Source:MGI Symbol;Acc:MGI:1098211]	chr4:149649168-149702571|-	52.8292	43.8545	0.229428	0.0743899	5578.5
ENSMUSG00000031767	Nudt7	nudix (nucleoside diphosphate linked moiety X)-type motif 7 [Source:MGI Symbol;Acc:MGI:1914778]	chr8:114133557-114154739|+	25.9938	21.603	0.225595	0.0834045	2260.77
ENSMUSG00000079423	Gm3286	predicted gene 3286 [Source:MGI Symbol;Acc:MGI:3781464]	chr5:95510758-95522953|+	205.08	171.204	0.222085	0.0219008	8051.44
ENSMUSG00000052446	Zfp961	zinc finger protein 961 [Source:MGI Symbol;Acc:MGI:3583954]	chr8:71951038-71993792|+	29.128	24.3306	0.220404	0.084547	1935.1
ENSMUSG00000022247	Brix1	BRX1, biogenesis of ribosomes [Source:MGI Symbol;Acc:MGI:1915082]	chr15:10474779-10485947|-	94.4932	79.0411	0.216675	0.0752027	3900.51
ENSMUSG00000074682	Zcchc3	zinc finger, CCHC domain containing 3 [Source:MGI Symbol;Acc:MGI:1915167]	chr2:152411955-152415027|-	53.883	45.3265	0.211201	0.0484322	2524.54
ENSMUSG00000072419	Dppa2	developmental pluripotency associated 2 [Source:MGI Symbol;Acc:MGI:2157523]	chr16:48310477-48319723|+	58.8102	49.7454	0.200359	0.0868016	1573.56
ENSMUSG00000038518	Jarid2	jumonji, AT rich interactive domain 2 [Source:MGI Symbol;Acc:MGI:104813]	chr13:44729474-44921643|+	25.937	22.013	0.197401	0.0449048	3625.36
ENSMUSG00000022205	Sub1	SUB1 homolog (S. cerevisiae) [Source:MGI Symbol;Acc:MGI:104811]	chr15:11981339-11996983|-	142.556	121.842	0.187169	0.041456	8880.69
ENSMUSG00000047710	Champ1	chromosome alignment maintaining phosphoprotein 1 [Source:MGI Symbol;Acc:MGI:1196398]	chr8:13869641-13881639|+	58.4053	49.9947	0.184906	0.0249734	3883.54
ENSMUSG00000041459	Tardbp	TAR DNA binding protein [Source:MGI Symbol;Acc:MGI:2387629]	chr4:148612382-148627019|-	33.8651	29.3712	0.16609	0.0325888	4154.34
ENSMUSG00000028967	Errfi1	ERBB receptor feedback inhibitor 1 [Source:MGI Symbol;Acc:MGI:1921405]	chr4:150853919-150868892|+	71.1544	61.9818	0.159686	0.090706	4123.25
ENSMUSG00000051391	Ywhag	tyrosine 3-monooxygenase/tryptophan 5-monooxygenase activation protein, gamma polypeptide [Source:MGI Symbol;Acc:MGI:108109]	chr5:135908409-135934616|-	95.56	103.196	-0.148581	0.0982786	8791.36
ENSMUSG00000056342	Usp34	ubiquitin specific peptidase 34 [Source:MGI Symbol;Acc:MGI:109473]	chr11:23306895-23490560|+	27.4754	29.7731	-0.154094	0.0555328	7708.97
ENSMUSG00000019814	Ltv1	LTV1 ribosome biogenesis factor [Source:MGI Symbol;Acc:MGI:2447810]	chr10:13178140-13193168|-	40.3896	43.8526	-0.155106	0.0741855	1525.42
ENSMUSG00000021366	Hivep1	human immunodeficiency virus type I enhancer binding protein 1 [Source:MGI Symbol;Acc:MGI:96100]	chr13:42052021-42192537|+	152.438	165.38	-0.155831	0.0649737	26288.8
ENSMUSG00000026933	Camsap1	calmodulin regulated spectrin-associated protein 1 [Source:MGI Symbol;Acc:MGI:3036242]	chr2:25926838-25983282|-	44.4108	48.3802	-0.161845	0.0913816	5952.28
ENSMUSG00000032254	Kif23	kinesin family member 23 [Source:MGI Symbol;Acc:MGI:1919069]	chr9:61915905-61946774|-	81.679	89.0767	-0.163735	0.0468074	10397.7
ENSMUSG00000029833	Trim24	tripartite motif-containing 24 [Source:MGI Symbol;Acc:MGI:109275]	chr6:37870811-37966296|+	42.2749	46.2094	-0.166124	0.0922349	5679.42
ENSMUSG00000017861	Mybl2	myeloblastosis oncogene-like 2 [Source:MGI Symbol;Acc:MGI:101785]	chr2:163054687-163084688|+	49.5804	54.4384	-0.170721	0.0946138	3942.05
ENSMUSG00000022201	Zfr	zinc finger RNA binding protein [Source:MGI Symbol;Acc:MGI:1341890]	chr15:12117831-12185683|+	47.9969	52.6131	-0.171218	0.0445949	5063.06
ENSMUSG00000021000	Ctage5	melanoma inhibitory activity 2 [Source:MGI Symbol;Acc:MGI:2159614]	chr12:59095799-59191583|+	27.8675	30.5514	-0.171697	0.0273839	4684.93
ENSMUSG00000026554	Dcaf8	DDB1 and CUL4 associated factor 8 [Source:MGI Symbol;Acc:MGI:91860]	chr1:172148084-172197005|+	24.7209	27.1246	-0.171935	0.0596791	6070.88
ENSMUSG00000027242	Wdr76	WD repeat domain 76 [Source:MGI Symbol;Acc:MGI:1926186]	chr2:121506723-121544860|+	35.2124	38.6481	-0.172022	0.0944072	3890.39
ENSMUSG00000027312	Atrn	attractin [Source:MGI Symbol;Acc:MGI:1341628]	chr2:130906495-131030333|+	8.90092	9.76633	-0.173076	0.0789524	1496.41
ENSMUSG00000061665	Cd2ap	CD2-associated protein [Source:MGI Symbol;Acc:MGI:1330281]	chr17:42792951-42876424|-	58.2878	64.1563	-0.177599	0.0242671	4988.26
ENSMUSG00000020184	Mdm2	transformed mouse 3T3 cell double minute 2 [Source:MGI Symbol;Acc:MGI:96952]	chr10:117688875-117710758|-	55.6303	61.3304	-0.179405	0.0464557	4270.77
ENSMUSG00000030494	Rhpn2	rhophilin, Rho GTPase binding protein 2 [Source:MGI Symbol;Acc:MGI:1289234]	chr7:35334170-35392289|+	150.489	166.48	-0.184074	0.0126037	16423.2
ENSMUSG00000050812	AI314180	expressed sequence AI314180 [Source:MGI Symbol;Acc:MGI:2140220]	chr4:58798911-58912749|-	56.0708	62.0695	-0.184382	0.0927025	10567.5
ENSMUSG00000001642	Akr1b3	aldo-keto reductase family 1, member B3 (aldose reductase) [Source:MGI Symbol;Acc:MGI:1353494]	chr6:34302434-34317478|-	38.4165	42.5991	-0.18701	0.0679212	4982.82
ENSMUSG00000032235	Ice2	interactor of little elongation complex ELL subunit 2 [Source:MGI Symbol;Acc:MGI:2135947]	chr9:69397906-69433122|+	25.8487	28.6556	-0.187022	0.0562119	3297.99
ENSMUSG00000061859	Patj	PATJ, crumbs cell polarity complex component [Source:MGI Symbol;Acc:MGI:1277960]	chr4:98395785-98719603|+	11.672	12.9505	-0.188256	0.0981202	2395.9
ENSMUSG00000040054	Baz2a	bromodomain adjacent to zinc finger domain, 2A [Source:MGI Symbol;Acc:MGI:2151152]	chr10:128091577-128129303|+	27.7702	30.827	-0.188495	0.084547	5088.04
ENSMUSG00000029388	Eif2b1	eukaryotic translation initiation factor 2B, subunit 1 (alpha) [Source:MGI Symbol;Acc:MGI:2384802]	chr5:124570213-124579131|-	75.4553	83.8216	-0.190509	0.0842368	3172.41
ENSMUSG00000029686	Cul1	cullin 1 [Source:MGI Symbol;Acc:MGI:1349658]	chr6:47453398-47526139|+	265.935	296.175	-0.194122	0.0824673	18736.5
ENSMUSG00000034575	Papd7	PAP associated domain containing 7 [Source:MGI Symbol;Acc:MGI:2682295]	chr13:69497959-69534617|-	55.3053	61.6631	-0.194786	0.0827045	8065.85
ENSMUSG00000001228	Uhrf1	ubiquitin-like, containing PHD and RING finger domains, 1 [Source:MGI Symbol;Acc:MGI:1338889]	chr17:56303321-56323486|+	98.7235	110.099	-0.195016	0.0775427	6755.51
ENSMUSG00000014503	Pkd2l2	polycystic kidney disease 2-like 2 [Source:MGI Symbol;Acc:MGI:1858231]	chr18:34409423-34442789|+	274.933	306.648	-0.195152	0.0859402	12375.2
ENSMUSG00000046230	Vps13a	vacuolar protein sorting 13A [Source:MGI Symbol;Acc:MGI:2444304]	chr19:16616763-16780822|-	45.0557	50.2384	-0.195456	0.00211044	7002.95
ENSMUSG00000021555	Naa35	N(alpha)-acetyltransferase 35, NatC auxiliary subunit [Source:MGI Symbol;Acc:MGI:1925939]	chr13:59585259-59634798|+	18.6254	20.765	-0.195896	0.0740965	1861.17
ENSMUSG00000029474	Rnf34	ring finger protein 34 [Source:MGI Symbol;Acc:MGI:2153340]	chr5:122850048-122871291|+	49.7056	55.6058	-0.199272	0.0599993	4078.38
ENSMUSG00000037851	Iars	isoleucine-tRNA synthetase [Source:MGI Symbol;Acc:MGI:2145219]	chr13:49682100-49734267|+	95.7979	107.058	-0.199301	0.0291053	6496
ENSMUSG00000038859	Baiap2l1	BAI1-associated protein 2-like 1 [Source:MGI Symbol;Acc:MGI:1914148]	chr5:144264526-144358112|-	125.406	140.381	-0.200135	0.0708249	6810.34
ENSMUSG00000032405	Pias1	protein inhibitor of activated STAT 1 [Source:MGI Symbol;Acc:MGI:1913125]	chr9:62878368-62987924|-	70.1892	78.5701	-0.201174	0.0306163	8329.05
ENSMUSG00000029422	Rsrc2	arginine/serine-rich coiled-coil 2 [Source:MGI Symbol;Acc:MGI:1913489]	chr5:123728426-123749414|-	8.43572	9.46975	-0.201563	0.0603372	1226.77
ENSMUSG00000042010	Acacb	acetyl-Coenzyme A carboxylase beta [Source:MGI Symbol;Acc:MGI:2140940]	chr5:114146535-114250761|+	7.25197	8.12489	-0.201772	0.0473969	1141.07
ENSMUSG00000020078	Vps26a	VPS26 retromer complex component A [Source:MGI Symbol;Acc:MGI:1353654]	chr10:62455235-62486805|-	128.829	144.394	-0.202164	0.0218392	6233.42
ENSMUSG00000057280	Musk	muscle, skeletal, receptor tyrosine kinase [Source:MGI Symbol;Acc:MGI:103581]	chr4:58285960-58374303|+	22.867	25.6995	-0.204683	0.0902168	1409.64
ENSMUSG00000052337	Immt	inner membrane protein, mitochondrial [Source:MGI Symbol;Acc:MGI:1923864]	chr6:71831331-71877388|+	8.51097	9.56968	-0.206245	0.0704102	1857.44
ENSMUSG00000055013	Agap1	ArfGAP with GTPase domain, ankyrin repeat and PH domain 1 [Source:MGI Symbol;Acc:MGI:2653690]	chr1:89454806-89897617|+	3.64551	4.10882	-0.20844	0.0827045	1145.96
ENSMUSG00000032777	Gtf3c1	general transcription factor III C 1 [Source:MGI Symbol;Acc:MGI:107887]	chr7:125640954-125707780|-	9.43453	10.6205	-0.209389	0.094203	1728.57
ENSMUSG00000002748	Baz1b	bromodomain adjacent to zinc finger domain, 1B [Source:MGI Symbol;Acc:MGI:1353499]	chr5:135187264-135246129|+	27.1346	30.5665	-0.209771	0.0664677	6136.95
ENSMUSG00000025980	Hspd1	heat shock protein 1 (chaperonin) [Source:MGI Symbol;Acc:MGI:96242]	chr1:55077835-55088243|-	46.891	52.8296	-0.209904	0.0819191	2459.61
ENSMUSG00000032399	Rpl4	ribosomal protein L4 [Source:MGI Symbol;Acc:MGI:1915141]	chr9:64173375-64178666|+	108.45	122.247	-0.210066	0.0649737	3410.41
ENSMUSG00000040669	Phc1	polyhomeotic-like 1 (Drosophila) [Source:MGI Symbol;Acc:MGI:103248]	chr6:122317731-122340561|-	26.8699	30.3087	-0.211299	0.0685454	2291.16
ENSMUSG00000037697	Ddhd1	DDHD domain containing 1 [Source:MGI Symbol;Acc:MGI:2150302]	chr14:45593174-45658143|-	39.4582	44.539	-0.212661	0.0179663	4495.18
ENSMUSG00000021273	Fdft1	farnesyl diphosphate farnesyl transferase 1 [Source:MGI Symbol;Acc:MGI:102706]	chr14:63145153-63177793|-	203.29	229.526	-0.212709	0.0325888	8433.82
ENSMUSG00000063450	Syne2	spectrin repeat containing, nuclear envelope 2 [Source:MGI Symbol;Acc:MGI:2449316]	chr12:75818134-76110926|+	44.6431	50.3949	-0.212767	0.0871646	17056
ENSMUSG00000031843	Mphosph6	M phase phosphoprotein 6 [Source:MGI Symbol;Acc:MGI:1915783]	chr8:117791645-117801943|-	465.888	525.924	-0.213191	0.0914035	19607.1
ENSMUSG00000019726	Lyst	lysosomal trafficking regulator [Source:MGI Symbol;Acc:MGI:107448]	chr13:13590397-13778803|+	7.71251	8.7112	-0.213281	0.0779426	2077.87
ENSMUSG00000043719	Col6a6	collagen, type VI, alpha 6 [Source:MGI Symbol;Acc:MGI:2444259]	chr9:105687809-105828160|-	10.6089	11.9893	-0.213335	0.0673034	1572.15
ENSMUSG00000029106	Add1	adducin 1 (alpha) [Source:MGI Symbol;Acc:MGI:87918]	chr5:34573664-34632308|+	17.4383	19.7133	-0.213585	0.0938254	2342.39
ENSMUSG00000041870	Ankrd13a	ankyrin repeat domain 13a [Source:MGI Symbol;Acc:MGI:1915670]	chr5:114774677-114806200|+	32.4154	36.6516	-0.213638	0.0963264	2883.11
ENSMUSG00000012609	Ttll5	tubulin tyrosine ligase-like family, member 5 [Source:MGI Symbol;Acc:MGI:2443657]	chr12:85824659-86061893|+	7.39124	8.35163	-0.21393	0.0993863	1882.93
ENSMUSG00000079562	Maea	macrophage erythroblast attacher [Source:MGI Symbol;Acc:MGI:1891748]	chr5:33335509-33373296|+	41.9373	47.4317	-0.21418	0.0314074	2193.17
ENSMUSG00000017376	Nlk	nemo like kinase [Source:MGI Symbol;Acc:MGI:1201387]	chr11:78567168-78697373|-	32.8392	37.1173	-0.214435	0.0924753	3056.63
ENSMUSG00000030616	Sytl2	synaptotagmin-like 2 [Source:MGI Symbol;Acc:MGI:1933366]	chr7:90302252-90410719|+	7.41522	8.38938	-0.215306	0.0332521	1768.1
ENSMUSG00000024589	Nedd4l	neural precursor cell expressed, developmentally down-regulated gene 4-like [Source:MGI Symbol;Acc:MGI:1933754]	chr18:64887756-65217826|+	14.0967	15.9423	-0.215892	0.0750222	2207.15
ENSMUSG00000002489	Tiam1	T cell lymphoma invasion and metastasis 1 [Source:MGI Symbol;Acc:MGI:103306]	chr16:89787111-89980080|-	71.233	80.6088	-0.215913	0.0397644	11157.8
ENSMUSG00000032311	Nrg4	neuregulin 4 [Source:MGI Symbol;Acc:MGI:1933833]	chr9:55220222-55326844|-	13.0222	14.746	-0.2167	0.0271207	1312.61
ENSMUSG00000038658	Ric1	RAB6A GEF complex partner 1 [Source:MGI Symbol;Acc:MGI:1924893]	chr19:29522282-29606829|+	28.1595	31.8853	-0.216795	0.0599993	4526.85
ENSMUSG00000000085	Scmh1	sex comb on midleg homolog 1 [Source:MGI Symbol;Acc:MGI:1352762]	chr4:120405281-120530186|+	21.7693	24.645	-0.217116	0.0356977	2487.52
ENSMUSG00000019818	Cd164	CD164 antigen [Source:MGI Symbol;Acc:MGI:1859568]	chr10:41519414-41531048|+	68.3923	77.452	-0.217183	0.0478966	4448.65
ENSMUSG00000024273	2700062C07Rik	RIKEN cDNA 2700062C07 gene [Source:MGI Symbol;Acc:MGI:1915296]	chr18:24470861-24477765|+	94.5793	107.28	-0.218677	0.0652218	1664.8
ENSMUSG00000033904	Ccp110	centriolar coiled coil protein 110 [Source:MGI Symbol;Acc:MGI:2141942]	chr7:118712552-118737024|+	19.4516	22.0579	-0.218871	0.0235639	2591.06
ENSMUSG00000028842	Ago3	argonaute RISC catalytic subunit 3 [Source:MGI Symbol;Acc:MGI:2446634]	chr4:126331704-126429556|-	13.132	14.896	-0.218951	0.0820282	3416.13
ENSMUSG00000038615	Nfe2l1	nuclear factor, erythroid derived 2,-like 1 [Source:MGI Symbol;Acc:MGI:99421]	chr11:96817414-96829968|-	59.9338	67.9988	-0.219734	0.016729	4989.38
ENSMUSG00000033282	Rpgrip1l	Rpgrip1-like [Source:MGI Symbol;Acc:MGI:1920563]	chr8:91217030-91313262|-	6.60099	7.49015	-0.221309	0.0751343	1715.22
ENSMUSG00000032479	Map4	microtubule-associated protein 4 [Source:MGI Symbol;Acc:MGI:97178]	chr9:109931460-110083955|+	47.8551	54.367	-0.222472	0.0289478	11946.3
ENSMUSG00000096225	Lhx8	LIM homeobox protein 8 [Source:MGI Symbol;Acc:MGI:1096343]	chr3:154306294-154330659|-	59.1196	67.2403	-0.222773	0.0864903	2133.63
ENSMUSG00000039220	Ppp1r10	protein phosphatase 1, regulatory subunit 10 [Source:MGI Symbol;Acc:MGI:1289273]	chr17:35916434-35932283|+	20.1617	22.9578	-0.223753	0.0385344	2313.78
ENSMUSG00000030867	Plk1	polo-like kinase 1 [Source:MGI Symbol;Acc:MGI:97621]	chr7:122159439-122169873|+	55.4373	63.0759	-0.223893	0.0682417	2071.07
ENSMUSG00000038116	Phf20	PHD finger protein 20 [Source:MGI Symbol;Acc:MGI:2444148]	chr2:156196466-156309952|+	28.0417	31.9079	-0.224241	0.0371634	5121.05
ENSMUSG00000035765	Dym	dymeclin [Source:MGI Symbol;Acc:MGI:1918480]	chr18:75018772-75286966|+	43.8915	49.9934	-0.225619	0.0819747	1857.32
ENSMUSG00000022385	Gtse1	G two S phase expressed protein 1 [Source:MGI Symbol;Acc:MGI:1352755]	chr15:85859707-85876572|+	24.2839	27.7261	-0.227179	0.0829022	1132.31
ENSMUSG00000025261	Huwe1	HECT, UBA and WWE domain containing 1 [Source:MGI Symbol;Acc:MGI:1926884]	chrX:151800807-151935417|+	17.496	19.956	-0.227387	0.0735104	7307.91
ENSMUSG00000047554	Tmem41b	transmembrane protein 41B [Source:MGI Symbol;Acc:MGI:1289225]	chr7:109972187-109986929|-	23.0611	26.2953	-0.227623	0.0320767	2310.07
ENSMUSG00000029910	Mad2l1	MAD2 mitotic arrest deficient-like 1 [Source:MGI Symbol;Acc:MGI:1860374]	chr6:66535390-66547220|+	19.5918	22.3522	-0.228048	0.0797817	2930.84
ENSMUSG00000042700	Sipa1l1	signal-induced proliferation-associated 1 like 1 [Source:MGI Symbol;Acc:MGI:2443679]	chr12:82169320-82451786|+	19.4202	22.1605	-0.228448	0.016057	3881.81
ENSMUSG00000044308	Ubr3	ubiquitin protein ligase E3 component n-recognin 3 [Source:MGI Symbol;Acc:MGI:1861100]	chr2:69897246-70024013|+	6.30084	7.18699	-0.228475	0.068653	953.964
ENSMUSG00000028868	Wasf2	WAS protein family, member 2 [Source:MGI Symbol;Acc:MGI:1098641]	chr4:133130505-133199756|+	42.3619	48.3867	-0.228873	0.0839547	4725.83
ENSMUSG00000034906	Ncaph	non-SMC condensin I complex, subunit H [Source:MGI Symbol;Acc:MGI:2444777]	chr2:127103809-127133954|-	28.3263	32.3516	-0.228934	0.0299801	2088.61
ENSMUSG00000028906	Epb41	erythrocyte membrane protein band 4.1 [Source:MGI Symbol;Acc:MGI:95401]	chr4:131923413-132075321|-	19.8301	22.6589	-0.229642	0.0730394	5360.73
ENSMUSG00000035173	Ccdc186	coiled-coil domain containing 186 [Source:MGI Symbol;Acc:MGI:2445022]	chr19:56787481-56822190|-	261.226	298.704	-0.230835	0.0979318	26375.9
ENSMUSG00000038084	Opa1	OPA1, mitochondrial dynamin like GTPase [Source:MGI Symbol;Acc:MGI:1921393]	chr16:29579334-29654884|+	13.5037	15.4391	-0.230896	0.0715482	1866.85
ENSMUSG00000021509	Slc25a48	solute carrier family 25, member 48 [Source:MGI Symbol;Acc:MGI:2145373]	chr13:56438355-56474239|+	34.9544	39.9799	-0.23188	0.00989312	2221.89
ENSMUSG00000030286	Emc3	ER membrane protein complex subunit 3 [Source:MGI Symbol;Acc:MGI:1913337]	chr6:113514874-113531652|-	19.8645	22.7605	-0.231992	0.0897198	903.994
ENSMUSG00000032497	Lrrfip2	leucine rich repeat (in FLII) interacting protein 2 [Source:MGI Symbol;Acc:MGI:1918518]	chr9:111117592-111225668|+	33.1668	37.9655	-0.232315	0.0431202	3644.28
ENSMUSG00000033444	Specc1l	sperm antigen with calponin homology and coiled-coil domains 1-like [Source:MGI Symbol;Acc:MGI:1921642]	chr10:75212073-75312743|+	17.9293	20.5108	-0.232517	0.0314112	4094.57
ENSMUSG00000029279	Brdt	bromodomain, testis-specific [Source:MGI Symbol;Acc:MGI:1891374]	chr5:107331159-107387058|+	50.567	57.8533	-0.23315	0.0508913	4455.24
ENSMUSG00000019984	Med23	mediator complex subunit 23 [Source:MGI Symbol;Acc:MGI:1917458]	chr10:24869986-24913681|+	14.0651	16.1158	-0.233558	0.0306163	1475.19
ENSMUSG00000047352	Olfr976	olfactory receptor 976 [Source:MGI Symbol;Acc:MGI:3030810]	chr9:39954139-39961133|-	36.2087	41.5008	-0.233592	0.0639133	2166.51
ENSMUSG00000041912	Tdrkh	tudor and KH domain containing protein [Source:MGI Symbol;Acc:MGI:1919884]	chr3:94413273-94434668|+	6.25579	7.17256	-0.234404	0.0710131	802.629
ENSMUSG00000029592	Usp30	ubiquitin specific peptidase 30 [Source:MGI Symbol;Acc:MGI:2140991]	chr5:114065461-114124720|+	42.1235	48.2921	-0.2345	0.0332521	3777.9
ENSMUSG00000017550	Atad5	ATPase family, AAA domain containing 5 [Source:MGI Symbol;Acc:MGI:2442925]	chr11:80089400-80135794|+	15.7258	18.0251	-0.234697	0.0868016	1836.46
ENSMUSG00000045980	Tmem104	transmembrane protein 104 [Source:MGI Symbol;Acc:MGI:2444222]	chr11:115187487-115247023|+	11.3569	13.0444	-0.234699	0.0635429	664.903
ENSMUSG00000031010	Usp9x	ubiquitin specific peptidase 9, X chromosome [Source:MGI Symbol;Acc:MGI:894681]	chrX:13071498-13173328|+	183.577	210.573	-0.234809	0.042673	43678.4
ENSMUSG00000032437	Stt3b	STT3, subunit of the oligosaccharyltransferase complex, homolog B (S. cerevisiae) [Source:MGI Symbol;Acc:MGI:1915542]	chr9:115242581-115310421|-	106.779	122.486	-0.235395	0.0476853	6901.26
ENSMUSG00000003814	Calr	calreticulin [Source:MGI Symbol;Acc:MGI:88252]	chr8:84841850-84846934|-	36.7348	42.0898	-0.235605	0.0327718	2159.18
ENSMUSG00000035064	Eef2k	eukaryotic elongation factor-2 kinase [Source:MGI Symbol;Acc:MGI:1195261]	chr7:120842831-120907450|+	20.5725	23.6194	-0.235726	0.0399718	2963.19
ENSMUSG00000049313	Sorl1	sortilin-related receptor, LDLR class A repeats-containing [Source:MGI Symbol;Acc:MGI:1202296]	chr9:41964720-42124297|-	9.21939	10.5851	-0.236808	0.0945334	1629.79
ENSMUSG00000028487	Bnc2	basonuclin 2 [Source:MGI Symbol;Acc:MGI:2443805]	chr4:84275095-84675275|-	28.8544	33.1452	-0.237672	0.0818029	4006.16
ENSMUSG00000035150	Eif2s3x	eukaryotic translation initiation factor 2, subunit 3, structural gene X-linked [Source:MGI Symbol;Acc:MGI:1349431]	chrX:94188707-94212862|-	29.1059	33.4436	-0.237841	0.0649737	1965.18
ENSMUSG00000078812	Eif5a	eukaryotic translation initiation factor 5A [Source:MGI Symbol;Acc:MGI:106248]	chr11:69916714-69921958|-	55.5967	63.929	-0.237918	0.0459982	2315.55
ENSMUSG00000033352	Map2k4	mitogen-activated protein kinase kinase 4 [Source:MGI Symbol;Acc:MGI:1346869]	chr11:65688243-65788297|-	39.2113	45.0566	-0.238302	0.0235639	3081.83
ENSMUSG00000040648	Ppip5k2	diphosphoinositol pentakisphosphate kinase 2 [Source:MGI Symbol;Acc:MGI:2142810]	chr1:97706048-97770411|-	15.4081	17.7051	-0.238757	0.0643333	3652.89
ENSMUSG00000031696	Vps35	VPS35 retromer complex component [Source:MGI Symbol;Acc:MGI:1890467]	chr8:85260392-85299802|-	5.43813	6.25328	-0.238771	0.094339	884.208
ENSMUSG00000018395	Kif3a	kinesin family member 3A [Source:MGI Symbol;Acc:MGI:107689]	chr11:53567379-53601967|+	16.3437	18.7735	-0.239002	0.0305778	1005.39
ENSMUSG00000021218	Gdi2	guanosine diphosphate (GDP) dissociation inhibitor 2 [Source:MGI Symbol;Acc:MGI:99845]	chr13:3538063-3567871|+	16.3742	18.8807	-0.241998	0.0484291	3041.25
ENSMUSG00000030309	Caprin2	caprin family member 2 [Source:MGI Symbol;Acc:MGI:2448541]	chr6:148842492-148896237|-	6.96709	8.03381	-0.242587	0.0321876	1775.43
ENSMUSG00000043535	Setx	senataxin [Source:MGI Symbol;Acc:MGI:2443480]	chr2:29124181-29182471|+	21.8873	25.2148	-0.242888	0.00751593	4336.07
ENSMUSG00000001472	Tcf25	transcription factor 25 (basic helix-loop-helix) [Source:MGI Symbol;Acc:MGI:1914105]	chr8:123373753-123403835|+	27.4342	31.6601	-0.243228	0.0906279	2649.97
ENSMUSG00000034187	Nsf	N-ethylmaleimide sensitive fusion protein [Source:MGI Symbol;Acc:MGI:104560]	chr11:103821782-103954056|-	44.8395	51.6795	-0.243896	0.000614	6336.15
ENSMUSG00000046591	Ticrr	TOPBP1-interacting checkpoint and replication regulator [Source:MGI Symbol;Acc:MGI:1924261]	chr7:79660196-79698148|+	83.2526	96.0482	-0.244171	0.0271664	13088.6
ENSMUSG00000069237	Fam8a1	family with sequence similarity 8, member A1 [Source:MGI Symbol;Acc:MGI:2145496]	chr13:46669522-46678056|+	60.0913	69.3439	-0.244699	0.0708249	2961.88
ENSMUSG00000018974	Sart3	squamous cell carcinoma antigen recognized by T cells 3 [Source:MGI Symbol;Acc:MGI:1858230]	chr5:113742446-113772510|-	46.8506	54.1362	-0.244834	0.090046	4337.64
ENSMUSG00000021557	Agtpbp1	ATP/GTP binding protein 1 [Source:MGI Symbol;Acc:MGI:2159437]	chr13:59449537-59585227|-	10.2161	11.7999	-0.245196	0.0944072	2343.04
ENSMUSG00000042520	Ubap2l	ubiquitin-associated protein 2-like [Source:MGI Symbol;Acc:MGI:1921633]	chr3:90000140-90052628|-	21.1746	24.4783	-0.246198	0.0897198	5836.24
ENSMUSG00000050612	Txndc2	thioredoxin domain containing 2 (spermatozoa) [Source:MGI Symbol;Acc:MGI:2389312]	chr17:65637505-65642204|-	73.8814	85.4707	-0.246244	0.0954449	2310.26
ENSMUSG00000022656	Nectin3	nectin cell adhesion molecule 3 [Source:MGI Symbol;Acc:MGI:1930171]	chr16:46387706-46498525|-	11.9515	13.8035	-0.246375	0.00491038	2436.97
ENSMUSG00000024740	Ddb1	damage specific DNA binding protein 1 [Source:MGI Symbol;Acc:MGI:1202384]	chr19:10605625-10629813|+	79.9653	92.3968	-0.246383	0.0284764	5881.18
ENSMUSG00000029174	Tbc1d1	TBC1 domain family, member 1 [Source:MGI Symbol;Acc:MGI:1889508]	chr5:64156305-64351486|+	23.4606	27.1425	-0.247273	0.0917972	2605.12
ENSMUSG00000031626	Sorbs2	sorbin and SH3 domain containing 2 [Source:MGI Symbol;Acc:MGI:1924574]	chr8:45507788-45827906|+	5.93995	6.86892	-0.247374	0.0555495	2816.93
ENSMUSG00000031447	Lamp1	lysosomal-associated membrane protein 1 [Source:MGI Symbol;Acc:MGI:96745]	chr8:13159161-13175338|+	76.3657	88.4144	-0.247714	0.0260059	2931.84
ENSMUSG00000010936	Vac14	Vac14 homolog (S. cerevisiae) [Source:MGI Symbol;Acc:MGI:2157980]	chr8:110618585-110720398|+	14.7208	17.0558	-0.24886	0.0299801	1690.52
ENSMUSG00000004105	Angptl2	angiopoietin-like 2 [Source:MGI Symbol;Acc:MGI:1347002]	chr2:33216069-33247717|+	7.03442	8.12542	-0.248893	0.0902168	830.669
ENSMUSG00000028649	Macf1	microtubule-actin crosslinking factor 1 [Source:MGI Symbol;Acc:MGI:108559]	chr4:123349633-123684360|-	4.55472	5.27224	-0.249268	0.0243472	2230.73
ENSMUSG00000030421	Uri1	URI1, prefoldin-like chaperone [Source:MGI Symbol;Acc:MGI:1342294]	chr7:37959992-38023551|-	12.5321	14.5309	-0.250011	0.0911393	799.342
ENSMUSG00000020516	Rps6kb1	ribosomal protein S6 kinase, polypeptide 1 [Source:MGI Symbol;Acc:MGI:1270849]	chr11:86498871-86544805|-	7.42078	8.5949	-0.250053	0.0235842	1164.52
ENSMUSG00000037458	Azin1	antizyme inhibitor 1 [Source:MGI Symbol;Acc:MGI:1859169]	chr15:38487430-38519266|-	18.1152	21.0041	-0.250884	0.0235639	1972.74
ENSMUSG00000030486	Zfp108	zinc finger protein 108 [Source:MGI Symbol;Acc:MGI:1891198]	chr7:24254794-24262445|+	117.121	135.883	-0.252449	0.0233546	5146.89
ENSMUSG00000037885	Stk35	serine/threonine kinase 35 [Source:MGI Symbol;Acc:MGI:1914583]	chr2:129800517-129832287|+	109.013	126.618	-0.252469	0.0618091	9277.53
ENSMUSG00000041577	Prelp	proline arginine-rich end leucine-rich repeat [Source:MGI Symbol;Acc:MGI:2151110]	chr1:133910304-133921414|-	20.9493	24.3064	-0.253097	0.0726711	1088.52
ENSMUSG00000023940	Sgol1	shugoshin-like 1 (S. pombe) [Source:MGI Symbol;Acc:MGI:1919665]	chr17:53674786-53689333|-	21.281	24.7685	-0.253949	0.0877081	1373.95
ENSMUSG00000056919	Cep162	centrosomal protein 162 [Source:MGI Symbol;Acc:MGI:1925343]	chr9:87189577-87255536|-	7.63218	8.87458	-0.254222	0.0981366	1388.14
ENSMUSG00000019866	Aim1	absent in melanoma 1 [Source:MGI Symbol;Acc:MGI:109544]	chr10:43950636-44148853|-	13.1057	15.2542	-0.254933	0.0599344	1613.61
ENSMUSG00000024096	Ralbp1	ralA binding protein 1 [Source:MGI Symbol;Acc:MGI:108466]	chr17:65848433-65885755|-	190.295	221.361	-0.255333	0.0279469	14908.5
ENSMUSG00000066113	Adamtsl1	ADAMTS-like 1 [Source:MGI Symbol;Acc:MGI:1924989]	chr4:85514172-86428385|+	10.9056	12.7055	-0.255333	0.0592682	2303.98
ENSMUSG00000033060	Lmo7	LIM domain only 7 [Source:MGI Symbol;Acc:MGI:1353586]	chr14:101729957-101934710|+	64.3053	74.8309	-0.256614	0.0190057	13217.3
ENSMUSG00000057278	Snrpg	small nuclear ribonucleoprotein polypeptide G [Source:MGI Symbol;Acc:MGI:1915261]	chr6:86371304-86379328|+	33.7902	39.3392	-0.256676	0.0700863	1114.74
ENSMUSG00000002052	Supt6	suppressor of Ty 6 [Source:MGI Symbol;Acc:MGI:107726]	chr11:78206746-78245987|-	52.93	61.6108	-0.257044	0.015532	5535.75
ENSMUSG00000033713	Foxn3	forkhead box N3 [Source:MGI Symbol;Acc:MGI:1918625]	chr12:99190078-99563582|-	18.3226	21.3565	-0.258879	0.00714367	3778.26
ENSMUSG00000018417	Myo1b	myosin IB [Source:MGI Symbol;Acc:MGI:107752]	chr1:51749765-51916071|-	7.55366	8.79593	-0.259006	0.0337295	1402.67
ENSMUSG00000031400	G6pdx	glucose-6-phosphate dehydrogenase X-linked [Source:MGI Symbol;Acc:MGI:105979]	chrX:74409483-74429194|-	223.41	260.549	-0.259775	0.00376307	10235.3
ENSMUSG00000055660	Mettl4	methyltransferase like 4 [Source:MGI Symbol;Acc:MGI:1924031]	chr17:94727080-94749892|-	27.7224	32.3754	-0.260632	0.032528	949.497
ENSMUSG00000033031	C330027C09Rik	RIKEN cDNA C330027C09 gene [Source:MGI Symbol;Acc:MGI:2146335]	chr16:48994185-49019709|+	19.3282	22.5598	-0.260645	0.0136169	1879.89
ENSMUSG00000026924	Sec16a	SEC16 homolog A, endoplasmic reticulum export factor [Source:MGI Symbol;Acc:MGI:2139207]	chr2:26409431-26445216|-	48.0414	56.1243	-0.261576	0.0117029	6957.12
ENSMUSG00000070047	Fat1	FAT atypical cadherin 1 [Source:MGI Symbol;Acc:MGI:109168]	chr8:44935447-45052257|+	36.4346	42.6065	-0.261807	0.0834045	6628.22
ENSMUSG00000000214	Th	tyrosine hydroxylase [Source:MGI Symbol;Acc:MGI:98735]	chr7:142892752-142931128|-	21.1971	24.8001	-0.261828	0.0632372	906.313
ENSMUSG00000029014	Dnajc2	DnaJ heat shock protein family (Hsp40) member C2 [Source:MGI Symbol;Acc:MGI:99470]	chr5:21757267-21785251|-	16.8696	19.7009	-0.262049	0.0182613	1648.22
ENSMUSG00000021549	Rasa1	RAS p21 protein activator 1 [Source:MGI Symbol;Acc:MGI:97860]	chr13:85214780-85289029|-	10.9773	12.863	-0.262694	0.0251723	1416.73
ENSMUSG00000022518	4930562C15Rik	RIKEN cDNA 4930562C15 gene [Source:MGI Symbol;Acc:MGI:1926059]	chr16:4835416-4867691|+	10.9343	12.7899	-0.262936	0.0599993	1115.91
ENSMUSG00000030852	Tacc2	transforming, acidic coiled-coil containing protein 2 [Source:MGI Symbol;Acc:MGI:1928899]	chr7:130577438-130764785|+	29.9518	35.0245	-0.263958	0.00343811	7884.7
ENSMUSG00000045636	Mtus1	mitochondrial tumor suppressor 1 [Source:MGI Symbol;Acc:MGI:2142572]	chr8:40990914-41133726|-	278.553	326.425	-0.266933	0.00385686	46338
ENSMUSG00000000827	Tpd52l2	tumor protein D52-like 2 [Source:MGI Symbol;Acc:MGI:1913564]	chr2:181497142-181517966|+	24.2968	28.5389	-0.267504	0.0107808	1901.06
ENSMUSG00000030583	Sipa1l3	signal-induced proliferation-associated 1 like 3 [Source:MGI Symbol;Acc:MGI:1921456]	chr7:29320372-29518641|-	5.29891	6.22501	-0.267846	0.00751593	1595.23
ENSMUSG00000023960	Enpp5	ectonucleotide pyrophosphatase/phosphodiesterase 5 [Source:MGI Symbol;Acc:MGI:1933830]	chr17:44078813-44086567|+	12.8041	15.0389	-0.268448	0.0608628	1078.11
ENSMUSG00000030660	Pik3c2a	phosphatidylinositol 3-kinase, C2 domain containing, alpha polypeptide [Source:MGI Symbol;Acc:MGI:1203729]	chr7:116337265-116443449|-	19.7483	23.1853	-0.269209	0.000565	3250.37
ENSMUSG00000032560	Dnajc13	DnaJ heat shock protein family (Hsp40) member C13 [Source:MGI Symbol;Acc:MGI:2676368]	chr9:104151282-104262930|-	22.8383	26.8191	-0.269688	0.0149733	4143.63
ENSMUSG00000001168	Oas1h	2'-5' oligoadenylate synthetase 1H [Source:MGI Symbol;Acc:MGI:2180853]	chr5:120861421-120873506|+	87.8689	103.231	-0.269731	0.0317888	2773.42
ENSMUSG00000034295	Fhod3	formin homology 2 domain containing 3 [Source:MGI Symbol;Acc:MGI:1925847]	chr18:24709445-25133500|+	50.8771	59.7681	-0.27008	0.048887	4630.84
ENSMUSG00000022119	Rbm26	RNA binding motif protein 26 [Source:MGI Symbol;Acc:MGI:1921463]	chr14:105106751-105177327|-	36.3014	42.6758	-0.270782	0.00834856	4889.96
ENSMUSG00000025812	Pard3	par-3 family cell polarity regulator [Source:MGI Symbol;Acc:MGI:2135608]	chr8:127063893-127612286|+	22.8522	26.8687	-0.270925	0.0299801	5775.02
ENSMUSG00000030641	Ddias	DNA damage-induced apoptosis suppressor [Source:MGI Symbol;Acc:MGI:1921291]	chr7:92857525-92874247|-	36.5531	43.0125	-0.271087	0.0773125	2221.01
ENSMUSG00000041991	Hrnr	hornerin [Source:MGI Symbol;Acc:MGI:3046938]	chr3:93319749-93333570|+	0	0.238773	-0.271396	1.92e-19	100.649
ENSMUSG00000022255	Mtdh	metadherin [Source:MGI Symbol;Acc:MGI:1914404]	chr15:34082694-34142386|+	7.33955	8.64016	-0.271667	0.0142415	1376.95
ENSMUSG00000000134	Tfe3	transcription factor E3 [Source:MGI Symbol;Acc:MGI:98511]	chrX:7762560-7775202|+	18.2058	21.4501	-0.271673	0.0827045	2447.16
ENSMUSG00000042508	Dmtf1	cyclin D binding myb-like transcription factor 1 [Source:MGI Symbol;Acc:MGI:1344415]	chr5:9118801-9161776|-	5.91894	6.96426	-0.271748	0.066618	1159.91
ENSMUSG00000002546	Golga2	golgi autoantigen, golgin subfamily a, 2 [Source:MGI Symbol;Acc:MGI:2139395]	chr2:32287384-32307921|+	12.4793	14.6691	-0.271775	0.0393969	1253.96
ENSMUSG00000046694	Fam46b	family with sequence similarity 46, member B [Source:MGI Symbol;Acc:MGI:2140500]	chr4:133480132-133487938|+	55.7744	65.7122	-0.272483	0.0441786	2246.18
ENSMUSG00000083012	Fam220a	family with sequence similarity 220, member A [Source:MGI Symbol;Acc:MGI:1914488]	chr5:143548706-143564531|+	28.6101	33.6896	-0.273434	0.0432742	2900.73
ENSMUSG00000029076	Sdf4	stromal cell derived factor 4 [Source:MGI Symbol;Acc:MGI:108079]	chr4:155992872-156013610|+	4.7729	5.61713	-0.274098	0.0578584	583.771
ENSMUSG00000026245	Farsb	phenylalanyl-tRNA synthetase, beta subunit [Source:MGI Symbol;Acc:MGI:1346035]	chr1:78417975-78488897|-	49.6007	58.4859	-0.274189	0.0282641	2386.71
ENSMUSG00000024491	Rbm27	RNA binding motif protein 27 [Source:MGI Symbol;Acc:MGI:2147194]	chr18:42275353-42341542|+	51.161	60.2977	-0.274376	0.0121214	6007.06
ENSMUSG00000034731	Dgkh	diacylglycerol kinase, eta [Source:MGI Symbol;Acc:MGI:2444188]	chr14:78569609-78725089|-	9.6232	11.3448	-0.274475	0.0661577	716.699
ENSMUSG00000050310	Rictor	RPTOR independent companion of MTOR, complex 2 [Source:MGI Symbol;Acc:MGI:1926007]	chr15:6708381-6800398|+	19.3283	22.7829	-0.274937	0.00704533	3147.05
ENSMUSG00000020897	Aurkb	aurora kinase B [Source:MGI Symbol;Acc:MGI:107168]	chr11:69045647-69051664|+	9.44741	11.1612	-0.275043	0.0704419	415.286
ENSMUSG00000033487	Fndc3a	fibronectin type III domain containing 3A [Source:MGI Symbol;Acc:MGI:1196463]	chr14:72537946-72710003|-	36.7748	43.3661	-0.275174	0.000619	6476.66
ENSMUSG00000024542	Cep192	centrosomal protein 192 [Source:MGI Symbol;Acc:MGI:1918049]	chr18:67800107-67885168|+	13.9153	16.4155	-0.27547	0.00382474	1899.1
ENSMUSG00000022789	Dnm1l	dynamin 1-like [Source:MGI Symbol;Acc:MGI:1921256]	chr16:16312235-16359030|-	40.9517	48.3364	-0.275698	0.0555328	3109.17
ENSMUSG00000021385	Ippk	inositol 1,3,4,5,6-pentakisphosphate 2-kinase [Source:MGI Symbol;Acc:MGI:1922928]	chr13:49421249-49464573|+	43.4635	51.3166	-0.276828	0.00133794	4084.42
ENSMUSG00000034751	Mast4	microtubule associated serine/threonine kinase family member 4 [Source:MGI Symbol;Acc:MGI:1918885]	chr13:102732486-103334497|-	4.58365	5.41046	-0.276929	0.0276709	2628.42
ENSMUSG00000022021	Diaph3	diaphanous related formin 3 [Source:MGI Symbol;Acc:MGI:1927222]	chr14:86655367-87141224|-	17.7134	20.9228	-0.277424	0.0665408	1543.37
ENSMUSG00000021066	Atl1	atlastin GTPase 1 [Source:MGI Symbol;Acc:MGI:1921241]	chr12:69892614-69966417|+	9.88318	11.6743	-0.278028	0.0431484	1496.82
ENSMUSG00000033276	Stk36	serine/threonine kinase 36 [Source:MGI Symbol;Acc:MGI:1920831]	chr1:74601445-74636894|+	38.8921	45.9933	-0.278443	0.0120063	4365.19
ENSMUSG00000001440	Kpnb1	karyopherin (importin) beta 1 [Source:MGI Symbol;Acc:MGI:107532]	chr11:97159714-97187881|-	39.5275	46.7181	-0.279385	0.0243472	4110.04
ENSMUSG00000019969	Psen1	presenilin 1 [Source:MGI Symbol;Acc:MGI:1202717]	chr12:83688152-83735199|+	48.763	57.7153	-0.279422	0.0219452	3535.27
ENSMUSG00000026187	Xrcc5	X-ray repair complementing defective repair in Chinese hamster cells 5 [Source:MGI Symbol;Acc:MGI:104517]	chr1:72307421-72394952|+	39.8066	47.1432	-0.279471	0.0700521	1495.77
ENSMUSG00000032745	Gpbp1	GC-rich promoter binding protein 1 [Source:MGI Symbol;Acc:MGI:1920524]	chr13:111425680-111490111|-	174.358	206.361	-0.279513	0.0161977	12635.6
ENSMUSG00000033382	Trappc8	trafficking protein particle complex 8 [Source:MGI Symbol;Acc:MGI:2443008]	chr18:20817224-20896078|-	28.8834	34.1668	-0.279587	0.0180697	2242.54
ENSMUSG00000001517	Foxm1	forkhead box M1 [Source:MGI Symbol;Acc:MGI:1347487]	chr6:128362967-128376146|+	36.485	43.237	-0.281523	0.068653	2997.18
ENSMUSG00000033826	Dnah8	dynein, axonemal, heavy chain 8 [Source:MGI Symbol;Acc:MGI:107714]	chr17:30624354-30875264|+	6.48207	7.66955	-0.281696	0.0123385	1463.31
ENSMUSG00000034867	Ankrd27	ankyrin repeat domain 27 (VPS9 domain) [Source:MGI Symbol;Acc:MGI:2444103]	chr7:35586244-35639226|+	14.7584	17.5044	-0.281754	0.0621877	1614.38
ENSMUSG00000038121	Fam210a	family with sequence similarity 210, member A [Source:MGI Symbol;Acc:MGI:1914000]	chr18:68260187-68300333|-	4.03735	4.80086	-0.28177	0.0851748	706.793
ENSMUSG00000038651	Sycp2l	synaptonemal complex protein 2-like [Source:MGI Symbol;Acc:MGI:2685114]	chr13:41114307-41171684|+	23.0702	27.3046	-0.281992	0.0639133	955.314
ENSMUSG00000027496	Aurka	aurora kinase A [Source:MGI Symbol;Acc:MGI:894678]	chr2:172356190-172370535|-	41.773	49.5363	-0.282121	0.0778381	1981.5
ENSMUSG00000071658	Gng3	guanine nucleotide binding protein (G protein), gamma 3 [Source:MGI Symbol;Acc:MGI:102704]	chr19:8836929-8839246|-	90.3656	107.221	-0.282824	0.0610662	2557.79
ENSMUSG00000029432	Gbas	glioblastoma amplified sequence [Source:MGI Symbol;Acc:MGI:1278343]	chr5:129725063-129758327|+	42.4653	50.2776	-0.282952	0.0376177	1873
ENSMUSG00000022521	Crebbp	CREB binding protein [Source:MGI Symbol;Acc:MGI:1098280]	chr16:4081328-4213997|-	55.4844	65.8736	-0.283682	0.0724765	13043.6
ENSMUSG00000029765	Plxna4	plexin A4 [Source:MGI Symbol;Acc:MGI:2179061]	chr6:32144268-32588192|-	13.6028	16.1579	-0.285495	0.0015812	3051.79
ENSMUSG00000020198	Ap3d1	adaptor-related protein complex 3, delta 1 subunit [Source:MGI Symbol;Acc:MGI:107734]	chr10:80706956-80742264|-	3.74323	4.4613	-0.286403	0.0546281	606.795
ENSMUSG00000001924	Uba1	ubiquitin-like modifier activating enzyme 1 [Source:MGI Symbol;Acc:MGI:98890]	chrX:20658326-20683179|+	69.6237	82.8159	-0.286477	0.0319188	5623.31
ENSMUSG00000042688	Mapk6	mitogen-activated protein kinase 6 [Source:MGI Symbol;Acc:MGI:1354946]	chr9:75369062-75410005|-	57.2698	68.0419	-0.28666	0.010935	6819.11
ENSMUSG00000038546	Ranbp9	RAN binding protein 9 [Source:MGI Symbol;Acc:MGI:1928741]	chr13:43402675-43481282|-	103.243	122.769	-0.286996	0.00779055	8849.19
ENSMUSG00000017707	Serinc3	serine incorporator 3 [Source:MGI Symbol;Acc:MGI:1349457]	chr2:163623272-163645131|-	14.8691	17.7315	-0.287295	0.0837188	744.81
ENSMUSG00000015023	Ddx19a	DEAD (Asp-Glu-Ala-Asp) box polypeptide 19a [Source:MGI Symbol;Acc:MGI:99526]	chr8:110974996-110997800|-	126.987	150.989	-0.287301	0.000341	6027.16
ENSMUSG00000006304	Arpc2	actin related protein 2/3 complex, subunit 2 [Source:MGI Symbol;Acc:MGI:1923959]	chr1:74236084-74268209|+	45.9996	54.7429	-0.287737	0.0306707	1716.25
ENSMUSG00000041229	Phf8	PHD finger protein 8 [Source:MGI Symbol;Acc:MGI:2444341]	chrX:151520672-151633859|+	23.3031	27.727	-0.28828	0.00182876	3893.16
ENSMUSG00000025558	Dock9	dedicator of cytokinesis 9 [Source:MGI Symbol;Acc:MGI:106321]	chr14:121542039-121797837|-	9.0276	10.7629	-0.289119	0.00338116	1984.07
ENSMUSG00000021371	Mcur1	mitochondrial calcium uniporter regulator 1 [Source:MGI Symbol;Acc:MGI:1923387]	chr13:43538393-43560191|-	7.11217	8.4748	-0.289187	0.0335927	925.301
ENSMUSG00000000001	Gnai3	guanine nucleotide binding protein (G protein), alpha inhibiting 3 [Source:MGI Symbol;Acc:MGI:95773]	chr3:108107280-108146146|-	40.869	48.7026	-0.289819	0.00265641	2040.76
ENSMUSG00000003119	Cdk12	cyclin-dependent kinase 12 [Source:MGI Symbol;Acc:MGI:1098802]	chr11:98203059-98278504|+	34.9837	41.7084	-0.290832	0.0021229	7403.72
ENSMUSG00000037172	E330009J07Rik	RIKEN cDNA E330009J07 gene [Source:MGI Symbol;Acc:MGI:2444256]	chr6:40401375-40436135|-	17.5308	20.8794	-0.291067	0.0270706	2278.47
ENSMUSG00000037313	Tacc3	transforming, acidic coiled-coil containing protein 3 [Source:MGI Symbol;Acc:MGI:1341163]	chr5:33658128-33678995|+	79.363	94.5958	-0.291101	6.7e-05	7781.65
ENSMUSG00000044726	Erich5	glutamate rich 5 [Source:MGI Symbol;Acc:MGI:2447772]	chr15:34453312-34473892|+	51.4094	61.3893	-0.29138	0.0608628	2351.36
ENSMUSG00000025745	Hadha	hydroxyacyl-Coenzyme A dehydrogenase/3-ketoacyl-Coenzyme A thiolase/enoyl-Coenzyme A hydratase (trifunctional protein), alpha subunit [Source:MGI Symbol;Acc:MGI:2135593]	chr5:30118304-30155162|-	7.83271	9.35188	-0.291436	0.0740965	1193.87
ENSMUSG00000028552	Eps15	epidermal growth factor receptor pathway substrate 15 [Source:MGI Symbol;Acc:MGI:104583]	chr4:109280268-109387817|+	15.6376	18.6604	-0.291457	0.0272212	1739.12
ENSMUSG00000021451	Sema4d	sema domain, immunoglobulin domain (Ig), transmembrane domain (TM) and short cytoplasmic domain, (semaphorin) 4D [Source:MGI Symbol;Acc:MGI:109244]	chr13:51701246-51793747|-	13.0318	15.558	-0.292001	0.0215186	1036.61
ENSMUSG00000025081	Tdrd1	tudor domain containing 1 [Source:MGI Symbol;Acc:MGI:1933218]	chr19:56826209-56870012|+	200.663	239.377	-0.292267	0.001666	15322
ENSMUSG00000019173	Rab5c	RAB5C, member RAS oncogene family [Source:MGI Symbol;Acc:MGI:105306]	chr11:100715009-100738215|-	46.3962	55.3885	-0.292514	0.0230158	1632.78
ENSMUSG00000020170	Frs2	fibroblast growth factor receptor substrate 2 [Source:MGI Symbol;Acc:MGI:1100860]	chr10:117069427-117148534|-	3.92361	4.69188	-0.29287	0.0596856	609.084
ENSMUSG00000068036	Afdn	afadin, adherens junction formation factor [Source:MGI Symbol;Acc:MGI:1314653]	chr17:13760539-13906150|+	23.5321	28.1308	-0.293465	0.0542481	3975.57
ENSMUSG00000038587	Akap12	A kinase (PRKA) anchor protein (gravin) 12 [Source:MGI Symbol;Acc:MGI:1932576]	chr10:4266380-4359470|+	87.9689	105.091	-0.293781	0.0316572	10388.2
ENSMUSG00000021824	Ap3m1	adaptor-related protein complex 3, mu 1 subunit [Source:MGI Symbol;Acc:MGI:1929212]	chr14:21031442-21052508|-	12.1377	14.5052	-0.29408	0.0555495	1626.25
ENSMUSG00000027881	Prpf38b	PRP38 pre-mRNA processing factor 38 (yeast) domain containing B [Source:MGI Symbol;Acc:MGI:1914171]	chr3:108902805-108911727|-	28.1423	33.6486	-0.294118	0.0865689	3405.06
ENSMUSG00000023192	Grm2	glutamate receptor, metabotropic 2 [Source:MGI Symbol;Acc:MGI:1351339]	chr9:106643095-106656082|-	30.8219	36.8298	-0.294535	0.0746996	2252.73
ENSMUSG00000024966	Stip1	stress-induced phosphoprotein 1 [Source:MGI Symbol;Acc:MGI:109130]	chr19:7020696-7040026|-	71.9615	86.0329	-0.294577	0.0602163	2410.91
ENSMUSG00000026490	Cdc42bpa	CDC42 binding protein kinase alpha [Source:MGI Symbol;Acc:MGI:2441841]	chr1:179960472-180165603|+	14.209	16.9652	-0.294939	0.00183264	5195.81
ENSMUSG00000031592	Pcm1	pericentriolar material 1 [Source:MGI Symbol;Acc:MGI:1277958]	chr8:41239752-41332344|+	88.5893	105.896	-0.295369	0.00963199	11788.4
ENSMUSG00000026005	Rpe	ribulose-5-phosphate-3-epimerase [Source:MGI Symbol;Acc:MGI:1913896]	chr1:66700831-66719805|+	15.9681	19.1184	-0.295911	0.0385629	951.334
ENSMUSG00000073664	Nbeal1	neurobeachin like 1 [Source:MGI Symbol;Acc:MGI:2444343]	chr1:60180599-60338328|+	1.49973	1.79772	-0.297622	0.0916379	753.189
ENSMUSG00000022100	Xpo7	exportin 7 [Source:MGI Symbol;Acc:MGI:1929705]	chr14:70654246-70766628|-	6.80041	8.15398	-0.297952	0.0207918	1816.85
ENSMUSG00000056050	Mia3	melanoma inhibitory activity 3 [Source:MGI Symbol;Acc:MGI:2443183]	chr1:183326725-183369553|-	16.9326	20.3186	-0.298208	0.00244439	1201.12
ENSMUSG00000044636	Csrnp2	cysteine-serine-rich nuclear protein 2 [Source:MGI Symbol;Acc:MGI:2386852]	chr15:100479570-100495239|-	143.882	172.652	-0.298287	0.0596791	9612.21
ENSMUSG00000038828	Tmem214	transmembrane protein 214 [Source:MGI Symbol;Acc:MGI:1916046]	chr5:30868012-30879180|+	5.37205	6.46922	-0.299041	0.0610029	588.287
ENSMUSG00000057193	Slc44a2	solute carrier family 44, member 2 [Source:MGI Symbol;Acc:MGI:1915932]	chr9:21320698-21355028|+	18.44	22.1578	-0.299259	0.0585158	2263.11
ENSMUSG00000026131	Dst	dystonin [Source:MGI Symbol;Acc:MGI:104627]	chr1:33908225-34308661|+	4.29438	5.1511	-0.299823	0.0013612	3013.97
ENSMUSG00000018931	Natd1	N-acetyltransferase domain containing 1 [Source:MGI Symbol;Acc:MGI:1344388]	chr11:60902246-60914750|-	166.989	200.525	-0.300637	0.00496482	10345.5
ENSMUSG00000044447	Dock5	dedicator of cytokinesis 5 [Source:MGI Symbol;Acc:MGI:2652871]	chr14:67751928-67933572|-	38.2989	45.9973	-0.301555	0.00269452	5783.47
ENSMUSG00000028134	Ptbp2	polypyrimidine tract binding protein 2 [Source:MGI Symbol;Acc:MGI:1860489]	chr3:119718742-119784466|-	10.8712	13.0789	-0.301582	0.0168782	1857.39
ENSMUSG00000015143	Actn1	actinin, alpha 1 [Source:MGI Symbol;Acc:MGI:2137706]	chr12:80167547-80260371|-	7.9072	9.50881	-0.302624	0.0914035	670.298
ENSMUSG00000019899	Lama2	laminin, alpha 2 [Source:MGI Symbol;Acc:MGI:99912]	chr10:26980036-27619758|-	6.74085	8.09919	-0.302823	0.0178604	1621.65
ENSMUSG00000028456	Unc13b	unc-13 homolog B (C. elegans) [Source:MGI Symbol;Acc:MGI:1342278]	chr4:43058953-43264871|+	6.02996	7.25277	-0.303055	0.0262008	2121.98
ENSMUSG00000029032	Arhgef16	Rho guanine nucleotide exchange factor (GEF) 16 [Source:MGI Symbol;Acc:MGI:2446219]	chr4:154278486-154301676|-	6.41019	7.7215	-0.303129	0.0618728	552.474
ENSMUSG00000006498	Ptbp1	polypyrimidine tract binding protein 1 [Source:MGI Symbol;Acc:MGI:97791]	chr10:79854427-79864771|+	65.546	78.8909	-0.3045	0.000614	5296.56
ENSMUSG00000042772	Smg7	Smg-7 homolog, nonsense mediated mRNA decay factor (C. elegans) [Source:MGI Symbol;Acc:MGI:2682334]	chr1:152836995-152902646|-	18.2114	21.9313	-0.304529	0.0037603	1985.64
ENSMUSG00000028759	Hp1bp3	heterochromatin protein 1, binding protein 3 [Source:MGI Symbol;Acc:MGI:109369]	chr4:138216296-138244683|+	3.61366	4.35035	-0.30545	0.0432742	482.539
ENSMUSG00000031835	Mbtps1	membrane-bound transcription factor peptidase, site 1 [Source:MGI Symbol;Acc:MGI:1927235]	chr8:119508156-119558735|-	2.07812	2.51056	-0.306986	0.0994019	342.325
ENSMUSG00000040225	Prrc2c	proline-rich coiled-coil 2C [Source:MGI Symbol;Acc:MGI:1913754]	chr1:162670725-162740556|-	50.6945	61.1272	-0.307618	0.00169647	15085.1
ENSMUSG00000021687	Scamp1	secretory carrier membrane protein 1 [Source:MGI Symbol;Acc:MGI:1349480]	chr13:94201310-94285857|-	21.7719	26.2768	-0.30771	0.00513336	1735.5
ENSMUSG00000032181	Scg3	secretogranin III [Source:MGI Symbol;Acc:MGI:103032]	chr9:75643189-75684056|-	26.9561	32.5416	-0.308244	0.0196682	1411.49
ENSMUSG00000029406	Pitpnm2	phosphatidylinositol transfer protein, membrane-associated 2 [Source:MGI Symbol;Acc:MGI:1336192]	chr5:124118690-124249760|-	1.96221	2.37008	-0.308752	0.0307971	440.308
ENSMUSG00000070733	Fryl	FRY like transcription coactivator [Source:MGI Symbol;Acc:MGI:1919563]	chr5:73019987-73256619|-	20.5853	24.8944	-0.310462	0.000151	5395.51
ENSMUSG00000062949	Atp11c	ATPase, class VI, type 11C [Source:MGI Symbol;Acc:MGI:1859661]	chrX:60223290-60592698|-	8.41792	10.1958	-0.310533	0.0999001	895.261
ENSMUSG00000030189	Ybx3	Y box protein 3 [Source:MGI Symbol;Acc:MGI:2137670]	chr6:131364855-131388476|-	188.892	228.802	-0.310831	0.0865689	10336.5
ENSMUSG00000030662	Ipo5	importin 5 [Source:MGI Symbol;Acc:MGI:1917822]	chr14:120911194-120948042|+	9.6768	11.6726	-0.31086	0.00989312	853.028
ENSMUSG00000024050	Wiz	widely-interspaced zinc finger motifs [Source:MGI Symbol;Acc:MGI:1332638]	chr17:32354055-32389401|-	3.82989	4.64419	-0.310874	0.0865689	575.95
ENSMUSG00000005610	Eif4g2	eukaryotic translation initiation factor 4, gamma 2 [Source:MGI Symbol;Acc:MGI:109207]	chr7:111067750-111083030|-	42.0874	50.8741	-0.311483	0.000151	8007.12
ENSMUSG00000042350	Arel1	apoptosis resistant E3 ubiquitin protein ligase 1 [Source:MGI Symbol;Acc:MGI:1915747]	chr12:84918148-84970900|-	12.1004	14.6785	-0.312511	0.0476972	1121.09
ENSMUSG00000071657	Bscl2	Berardinelli-Seip congenital lipodystrophy 2 (seipin) [Source:MGI Symbol;Acc:MGI:1298392]	chr19:8837467-8848683|+	11.0202	13.3521	-0.312758	0.0164026	1101.74
ENSMUSG00000054582	Pabpc1l	poly(A) binding protein, cytoplasmic 1-like [Source:MGI Symbol;Acc:MGI:1922908]	chr2:164025450-164050538|+	22.5468	27.2917	-0.313176	0.00938481	1133.54
ENSMUSG00000029247	Paics	phosphoribosylaminoimidazole carboxylase, phosphoribosylaminoribosylaminoimidazole, succinocarboxamide synthetase [Source:MGI Symbol;Acc:MGI:1914304]	chr5:76951307-76967509|+	32.0788	38.8726	-0.313813	0.0010655	1568.69
ENSMUSG00000071074	Yipf3	Yip1 domain family, member 3 [Source:MGI Symbol;Acc:MGI:106280]	chr17:46248080-46252537|+	8.68137	10.5246	-0.314463	0.0700521	328.063
ENSMUSG00000029191	Rfc1	replication factor C (activator 1) 1 [Source:MGI Symbol;Acc:MGI:97891]	chr5:65261850-65335670|-	18.9232	22.9276	-0.31447	0.00249888	2076.04
ENSMUSG00000024976	Shoc2	soc-2 (suppressor of clear) homolog (C. elegans) [Source:MGI Symbol;Acc:MGI:1927197]	chr19:53944306-54033268|+	80.8891	98.0444	-0.315273	0.00235882	4548.3
ENSMUSG00000017631	Abr	active BCR-related gene [Source:MGI Symbol;Acc:MGI:107771]	chr11:76416734-76622314|-	15.3466	18.6046	-0.315454	0.00208274	2494.69
ENSMUSG00000021143	Pacs2	phosphofurin acidic cluster sorting protein 2 [Source:MGI Symbol;Acc:MGI:1924399]	chr12:113014508-113074401|+	20.9368	25.4427	-0.315863	0.0472326	2627.33
ENSMUSG00000024592	C330018D20Rik	RIKEN cDNA C330018D20 gene [Source:MGI Symbol;Acc:MGI:1924672]	chr18:56955833-56975368|-	10.7024	12.9978	-0.316925	0.0779954	480.566
ENSMUSG00000062939	Stat4	signal transducer and activator of transcription 4 [Source:MGI Symbol;Acc:MGI:103062]	chr1:51987148-52107189|+	7.85615	9.52677	-0.317312	0.0345526	520.422
ENSMUSG00000013701	Timm23	translocase of inner mitochondrial membrane 23 [Source:MGI Symbol;Acc:MGI:1858317]	chr14:32180162-32201898|-	30.1612	36.57	-0.317999	0.0129249	1064.87
ENSMUSG00000028647	Mycbp	MYC binding protein [Source:MGI Symbol;Acc:MGI:1891750]	chr4:123904832-123912269|+	20.519	24.9999	-0.31857	0.0555495	1023.17
ENSMUSG00000069622	Gm10273	predicted pseudogene 10273 [Source:MGI Symbol;Acc:MGI:3704362]	chr10:59395632-59396757|+	27.1508	32.8473	-0.31891	0.0155684	635.241
ENSMUSG00000024673	Ms4a1	membrane-spanning 4-domains, subfamily A, member 1 [Source:MGI Symbol;Acc:MGI:88321]	chr19:11249675-11266241|-	6.91596	8.44022	-0.319437	0.0639133	741.391
ENSMUSG00000031753	Cog4	component of oligomeric golgi complex 4 [Source:MGI Symbol;Acc:MGI:2142808]	chr8:110846600-110882227|+	8.28634	10.0754	-0.319535	0.09345	622.144
ENSMUSG00000051890	Klhdc1	kelch domain containing 1 [Source:MGI Symbol;Acc:MGI:2672853]	chr12:69241176-69284632|+	26.0351	31.6735	-0.320172	0.0123367	1453.2
ENSMUSG00000025757	Hspa4l	heat shock protein 4 like [Source:MGI Symbol;Acc:MGI:107422]	chr3:40744495-40796103|+	7.37831	8.97679	-0.320555	0.00641116	1448.32
ENSMUSG00000024294	Mib1	mindbomb E3 ubiquitin protein ligase 1 [Source:MGI Symbol;Acc:MGI:2443157]	chr18:10725548-10818704|+	2.63232	3.21495	-0.321489	0.0778381	476.858
ENSMUSG00000050605	Zfp61	zinc finger protein 61 [Source:MGI Symbol;Acc:MGI:99663]	chr7:24291039-24301232|-	9.27673	11.3188	-0.321562	0.0500077	709.965
ENSMUSG00000053510	Nrd1	nardilysin, N-arginine dibasic convertase, NRD convertase 1 [Source:MGI Symbol;Acc:MGI:1201386]	chr4:109000655-109061777|+	15.1348	18.4783	-0.322256	0.0183589	1555.31
ENSMUSG00000034088	Hdlbp	high density lipoprotein (HDL) binding protein [Source:MGI Symbol;Acc:MGI:99256]	chr1:93405940-93478815|-	39.4721	48.0998	-0.323195	8.21e-07	8095.58
ENSMUSG00000013160	Atp6v0d1	ATPase, H+ transporting, lysosomal V0 subunit D1 [Source:MGI Symbol;Acc:MGI:1201778]	chr8:105524465-105566047|-	15.8978	19.4117	-0.323691	0.0733427	544.503
ENSMUSG00000034593	Myo5a	myosin VA [Source:MGI Symbol;Acc:MGI:105976]	chr9:75071015-75223688|+	8.24243	10.0768	-0.324807	0.016717	2128.09
ENSMUSG00000021686	Ap3b1	adaptor-related protein complex 3, beta 1 subunit [Source:MGI Symbol;Acc:MGI:1333879]	chr13:94358960-94566317|+	33.8525	41.4235	-0.326404	0.0643193	2531.75
ENSMUSG00000038000	Acd	adrenocortical dysplasia [Source:MGI Symbol;Acc:MGI:87873]	chr8:105695860-105701102|-	17.1506	20.992	-0.326449	0.0342975	1017.68
ENSMUSG00000020697	Lig3	ligase III, DNA, ATP-dependent [Source:MGI Symbol;Acc:MGI:109152]	chr11:82781108-82804274|+	8.58812	10.5166	-0.326673	0.0109689	1017.32
ENSMUSG00000031004	Mki67	antigen identified by monoclonal antibody Ki 67 [Source:MGI Symbol;Acc:MGI:106035]	chr7:135689784-135716361|-	62.4704	76.4376	-0.326717	0.04831	10810.8
ENSMUSG00000047766	Lrrc49	leucine rich repeat containing 49 [Source:MGI Symbol;Acc:MGI:2442689]	chr9:60568859-60688158|-	3.11253	3.80809	-0.326778	0.0779426	338.975
ENSMUSG00000002835	Chaf1a	chromatin assembly factor 1, subunit A (p150) [Source:MGI Symbol;Acc:MGI:1351331]	chr17:56040416-56068026|+	51.786	63.3641	-0.326807	0.0318571	3021.25
ENSMUSG00000031540	Kat6a	K(lysine) acetyltransferase 6A [Source:MGI Symbol;Acc:MGI:2442415]	chr8:22859535-22943259|+	18.071	22.1021	-0.327584	9.09e-05	2965.8
ENSMUSG00000048502	Duxbl1	double homeobox B-like 1 [Source:MGI Symbol;Acc:MGI:1916048]	chr14:25978577-25990088|+	17.6981	21.6909	-0.32877	0.0850161	1602.73
ENSMUSG00000024773	Atg2a	autophagy related 2A [Source:MGI Symbol;Acc:MGI:1916291]	chr19:6241668-6262335|+	8.48356	10.4106	-0.329476	0.0182613	947.259
ENSMUSG00000033161	Atp1a1	ATPase, Na+/K+ transporting, alpha 1 polypeptide [Source:MGI Symbol;Acc:MGI:88105]	chr3:101576219-101604684|-	59.5706	73.0793	-0.330414	0.0517463	3250.52
ENSMUSG00000011257	Pabpc4	poly(A) binding protein, cytoplasmic 4 [Source:MGI Symbol;Acc:MGI:2385206]	chr4:123262351-123298925|+	21.8831	26.8716	-0.330512	0.0520876	1753.88
ENSMUSG00000026553	Copa	coatomer protein complex subunit alpha [Source:MGI Symbol;Acc:MGI:1334462]	chr1:172082529-172122330|+	10.0411	12.3268	-0.330778	0.041456	1698.92
ENSMUSG00000035247	Hectd1	HECT domain containing 1 [Source:MGI Symbol;Acc:MGI:2384768]	chr12:51743722-51829536|-	13.8322	16.9623	-0.331545	0.000749	2663.11
ENSMUSG00000039621	Prex1	phosphatidylinositol-3,4,5-trisphosphate-dependent Rac exchange factor 1 [Source:MGI Symbol;Acc:MGI:3040696]	chr2:166566342-166713832|-	6.45448	7.93347	-0.332297	0.0839489	855.552
ENSMUSG00000048108	Tmem72	transmembrane protein 72 [Source:MGI Symbol;Acc:MGI:2442707]	chr6:116679063-116716913|-	3.5011	4.29631	-0.333248	0.00419144	1381.46
ENSMUSG00000056770	Setd3	SET domain containing 3 [Source:MGI Symbol;Acc:MGI:1289184]	chr12:108106431-108179314|-	6.95284	8.56953	-0.334168	0.0175739	880.63
ENSMUSG00000020107	Anapc16	anaphase promoting complex subunit 16 [Source:MGI Symbol;Acc:MGI:1289325]	chr10:59987409-60003135|-	15.8811	19.5395	-0.334207	0.00178388	1241.63
ENSMUSG00000029684	Wasl	Wiskott-Aldrich syndrome-like (human) [Source:MGI Symbol;Acc:MGI:1920428]	chr6:24613805-24665009|-	36.0235	44.2895	-0.334348	0.00690471	4152.97
ENSMUSG00000015961	Adss	adenylosuccinate synthetase, non muscle [Source:MGI Symbol;Acc:MGI:87948]	chr1:177762962-177796511|-	89.0325	109.715	-0.334879	0.0452895	8103.07
ENSMUSG00000038312	Edem2	ER degradation enhancer, mannosidase alpha-like 2 [Source:MGI Symbol;Acc:MGI:1915540]	chr2:155701677-155729475|-	7.91537	9.7733	-0.334911	0.08314	481.744
ENSMUSG00000020454	Eif4enif1	eukaryotic translation initiation factor 4E nuclear import factor 1 [Source:MGI Symbol;Acc:MGI:1921453]	chr11:3202392-3244588|+	135.013	166.292	-0.336678	0.0170833	15221.4
ENSMUSG00000024059	Clip4	CAP-GLY domain containing linker protein family, member 4 [Source:MGI Symbol;Acc:MGI:1919100]	chr17:71781947-71858351|+	6.6072	8.16674	-0.33734	0.035006	528.842
ENSMUSG00000020196	Cabin1	calcineurin binding protein 1 [Source:MGI Symbol;Acc:MGI:1298375]	chr10:75646112-75764341|-	10.5374	13.0001	-0.337387	0.0176991	2323.78
ENSMUSG00000016253	Nelfcd	negative elongation factor complex member C/D, Th1l [Source:MGI Symbol;Acc:MGI:1926424]	chr2:174415804-174427502|+	6.16494	7.63406	-0.337627	0.0879378	353.622
ENSMUSG00000026615	Eprs	glutamyl-prolyl-tRNA synthetase [Source:MGI Symbol;Acc:MGI:97838]	chr1:185363044-185428360|+	6.80937	8.37921	-0.337958	0.00077	2213.12
ENSMUSG00000026605	Cenpf	centromere protein F [Source:MGI Symbol;Acc:MGI:1313302]	chr1:189640606-189688086|-	65.5972	80.9843	-0.338002	0.0994019	16571
ENSMUSG00000037646	Vps13b	vacuolar protein sorting 13B [Source:MGI Symbol;Acc:MGI:1916380]	chr15:35371546-35931228|+	5.39933	6.65797	-0.338027	0.00944092	1292.75
ENSMUSG00000034066	Farp2	FERM, RhoGEF and pleckstrin domain protein 2 [Source:MGI Symbol;Acc:MGI:2385126]	chr1:93512079-93621976|+	6.67755	8.25003	-0.339303	0.0363657	538.267
ENSMUSG00000026915	Strbp	spermatid perinuclear RNA binding protein [Source:MGI Symbol;Acc:MGI:104626]	chr2:37483228-37703859|-	8.4638	10.4342	-0.339372	0.00136758	2901.03
ENSMUSG00000041757	Plekha6	pleckstrin homology domain containing, family A member 6 [Source:MGI Symbol;Acc:MGI:2388662]	chr1:133164210-133303435|+	3.57321	4.40746	-0.340128	0.0818427	739.111
ENSMUSG00000004460	Dnajb11	DnaJ heat shock protein family (Hsp40) member B11 [Source:MGI Symbol;Acc:MGI:1915088]	chr16:22857845-22879634|+	25.3005	31.2459	-0.340428	0.014312	1205.5
ENSMUSG00000039157	Fam102a	family with sequence similarity 102, member A [Source:MGI Symbol;Acc:MGI:2138935]	chr2:32535332-32569756|+	3.99384	4.94017	-0.340603	0.0673034	436.806
ENSMUSG00000024376	Epb41l4a	erythrocyte membrane protein band 4.1 like 4a [Source:MGI Symbol;Acc:MGI:103007]	chr18:33796327-34007206|-	9.66228	11.9299	-0.340954	0.0350841	644.964
ENSMUSG00000019802	Sec63	SEC63-like (S. cerevisiae) [Source:MGI Symbol;Acc:MGI:2155302]	chr10:42761496-42832514|+	4.0855	5.03242	-0.341156	0.0253008	605.22
ENSMUSG00000007817	Zmiz1	zinc finger, MIZ-type containing 1 [Source:MGI Symbol;Acc:MGI:3040693]	chr14:25459185-25666743|+	9.18725	11.3597	-0.341162	0.0772925	1952.06
ENSMUSG00000032458	Copb2	coatomer protein complex, subunit beta 2 (beta prime) [Source:MGI Symbol;Acc:MGI:1354962]	chr9:98563721-98588382|+	21.7002	26.8043	-0.341332	1.39e-05	2516.97
ENSMUSG00000035545	Leng8	leukocyte receptor cluster (LRC) member 8 [Source:MGI Symbol;Acc:MGI:2142195]	chr7:4137039-4148177|+	11.6553	14.4291	-0.341443	0.0865138	1304.88
ENSMUSG00000045294	Insig1	insulin induced gene 1 [Source:MGI Symbol;Acc:MGI:1916289]	chr5:28071363-28078662|+	97.8214	120.899	-0.342004	0.000927	4186.05
ENSMUSG00000030102	Itpr1	inositol 1,4,5-trisphosphate receptor 1 [Source:MGI Symbol;Acc:MGI:96623]	chr6:108213096-108551109|+	8.87928	10.9759	-0.34218	0.0226527	2794.93
ENSMUSG00000023923	Tbc1d5	TBC1 domain family, member 5 [Source:MGI Symbol;Acc:MGI:1919488]	chr17:50733127-51179349|-	7.13994	8.80919	-0.34268	0.0310915	654.8
ENSMUSG00000006720	Zfp184	zinc finger protein 184 (Kruppel-like) [Source:MGI Symbol;Acc:MGI:1922244]	chr13:21945094-21960779|+	6.86948	8.50154	-0.343071	0.0743899	336.491
ENSMUSG00000056394	Lig1	ligase I, DNA, ATP-dependent [Source:MGI Symbol;Acc:MGI:101789]	chr7:13277283-13311433|+	7.92777	9.79846	-0.343696	0.0427123	608.009
ENSMUSG00000036402	Gng12	guanine nucleotide binding protein (G protein), gamma 12 [Source:MGI Symbol;Acc:MGI:1336171]	chr6:66896397-67021350|+	23.2499	28.8126	-0.345027	0.00779055	2196.72
ENSMUSG00000060992	Copz1	coatomer protein complex, subunit zeta 1 [Source:MGI Symbol;Acc:MGI:1929063]	chr15:103272911-103299862|+	36.7948	45.5571	-0.345268	0.0010257	1452.45
ENSMUSG00000006005	Tpr	translocated promoter region, nuclear basket protein [Source:MGI Symbol;Acc:MGI:1922066]	chr1:150392838-150449935|+	34.97	43.3421	-0.346201	0.00285461	6812.98
ENSMUSG00000038708	Golga4	golgi autoantigen, golgin subfamily a, 4 [Source:MGI Symbol;Acc:MGI:1859646]	chr9:118506267-118582519|+	32.0517	39.7727	-0.346627	0.0477495	6734.39
ENSMUSG00000029502	Golga3	golgi autoantigen, golgin subfamily a, 3 [Source:MGI Symbol;Acc:MGI:96958]	chr5:110176701-110226470|+	8.906	11.0474	-0.346966	0.0111796	1842.67
ENSMUSG00000024120	Lrpprc	leucine-rich PPR-motif containing [Source:MGI Symbol;Acc:MGI:1919666]	chr17:84705247-84790789|-	3.79074	4.71069	-0.348179	0.0513287	706.775
ENSMUSG00000032359	Ctsh	cathepsin H [Source:MGI Symbol;Acc:MGI:107285]	chr9:90054152-90076089|+	16.4554	20.3824	-0.348236	0.0010257	1262.33
ENSMUSG00000028034	Fubp1	far upstream element (FUSE) binding protein 1 [Source:MGI Symbol;Acc:MGI:1196294]	chr3:152210422-152236826|+	5.2	6.46318	-0.348553	0.0318571	1351.55
ENSMUSG00000026175	Vil1	villin 1 [Source:MGI Symbol;Acc:MGI:98930]	chr1:74409376-74435559|+	24.8961	30.9305	-0.349366	0.0127729	1543.86
ENSMUSG00000021065	Fut8	fucosyltransferase 8 [Source:MGI Symbol;Acc:MGI:1858901]	chr12:77238125-77476338|+	6.14852	7.64173	-0.34976	0.0205108	757.745
ENSMUSG00000056004	9330182L06Rik	RIKEN cDNA 9330182L06 gene [Source:MGI Symbol;Acc:MGI:2443264]	chr5:9266118-9481825|+	2.81062	3.49835	-0.34979	0.0957327	287.604
ENSMUSG00000026712	Mrc1	mannose receptor, C type 1 [Source:MGI Symbol;Acc:MGI:97142]	chr2:14229392-14332057|+	5.43229	6.75483	-0.35031	0.035116	602.986
ENSMUSG00000068101	Cenpm	centromere protein M [Source:MGI Symbol;Acc:MGI:1913820]	chr15:82233779-82244747|-	49.5453	61.7029	-0.350695	0.0136145	686.715
ENSMUSG00000093661	Eif4e3	eukaryotic translation initiation factor 4E member 3 [Source:MGI Symbol;Acc:MGI:1914142]	chr6:99625135-99666771|-	113.827	141.358	-0.350767	0.000191	5076.77
ENSMUSG00000021175	Cdca7l	cell division cycle associated 7 like [Source:MGI Symbol;Acc:MGI:2384982]	chr12:117804289-117878706|+	7.63016	9.51497	-0.351386	0.0453602	487.317
ENSMUSG00000030275	Etnk1	ethanolamine kinase 1 [Source:MGI Symbol;Acc:MGI:1922570]	chr6:143167221-143232307|+	3.06618	3.82442	-0.351564	0.016729	540.984
ENSMUSG00000041720	Pi4ka	phosphatidylinositol 4-kinase, catalytic, alpha polypeptide [Source:MGI Symbol;Acc:MGI:2448506]	chr16:17280351-17406314|-	6.86071	8.53365	-0.351804	0.0112459	1116.08
ENSMUSG00000055421	Pcdh9	protocadherin 9 [Source:MGI Symbol;Acc:MGI:1306801]	chr14:93013410-93890679|-	24.5172	30.5847	-0.352523	0.0377519	2998.45
ENSMUSG00000057738	Sptan1	spectrin alpha, non-erythrocytic 1 [Source:MGI Symbol;Acc:MGI:98386]	chr2:29965560-30031451|+	18.7243	23.3103	-0.353716	1.82e-06	4143.21
ENSMUSG00000034994	Eef2	eukaryotic translation elongation factor 2 [Source:MGI Symbol;Acc:MGI:95288]	chr10:81176631-81182498|+	35.2049	43.88	-0.355088	0.000519	1963.24
ENSMUSG00000018830	Myh11	myosin, heavy polypeptide 11, smooth muscle [Source:MGI Symbol;Acc:MGI:102643]	chr16:14194527-14291408|-	26.5348	33.1515	-0.355201	0.0817206	3416.78
ENSMUSG00000022441	Efcab6	EF-hand calcium binding domain 6 [Source:MGI Symbol;Acc:MGI:1924877]	chr15:83866712-84065379|-	10.4566	13.081	-0.355825	0.0445672	1244.81
ENSMUSG00000026399	Cd55	CD55 molecule, decay accelerating factor for complement [Source:MGI Symbol;Acc:MGI:104850]	chr1:130439027-130462744|-	68.0892	85.101	-0.356412	0.0193915	5236.21
ENSMUSG00000071662	Polr2g	polymerase (RNA) II (DNA directed) polypeptide G [Source:MGI Symbol;Acc:MGI:1914960]	chr19:8793129-8798557|-	26.2494	32.9714	-0.357613	0.0877081	700.905
ENSMUSG00000020929	Eftud2	elongation factor Tu GTP binding domain containing 2 [Source:MGI Symbol;Acc:MGI:1336880]	chr11:102838473-102880985|-	6.07038	7.58901	-0.359375	0.0156409	800.531
ENSMUSG00000081044	AU015836	expressed sequence AU015836 [Source:MGI Symbol;Acc:MGI:2147954]	chrX:93968659-93975470|+	256.653	321.57	-0.359511	0.0395082	15991.7
ENSMUSG00000024073	Birc6	baculoviral IAP repeat-containing 6 [Source:MGI Symbol;Acc:MGI:1276108]	chr17:74528295-74703356|+	4.55156	5.69256	-0.359786	1.66e-05	2321.06
ENSMUSG00000002981	Clptm1	cleft lip and palate associated transmembrane protein 1 [Source:MGI Symbol;Acc:MGI:1927155]	chr7:19631571-19665033|-	17.9647	22.5165	-0.360162	0.031025	1658.78
ENSMUSG00000042572	Ube2q1	ubiquitin-conjugating enzyme E2Q family member 1 [Source:MGI Symbol;Acc:MGI:1917343]	chr3:89773616-89784000|+	3.87136	4.8678	-0.360179	0.0851748	354.72
ENSMUSG00000055150	Zfp78	zinc finger protein 78 [Source:MGI Symbol;Acc:MGI:107783]	chr7:6363280-6382605|+	6.84447	8.59829	-0.360865	0.0620694	560.814
ENSMUSG00000022601	Zbtb11	zinc finger and BTB domain containing 11 [Source:MGI Symbol;Acc:MGI:2443876]	chr16:55973883-56008913|+	4.90449	6.16328	-0.360887	0.0893661	689.07
ENSMUSG00000091387	Gcnt4	glucosaminyl (N-acetyl) transferase 4, core 2 (beta-1,6-N-acetylglucosaminyltransferase) [Source:MGI Symbol;Acc:MGI:2684919]	chr13:96924689-96950906|+	49.9391	62.6144	-0.361261	0.0182247	3410.14
ENSMUSG00000026142	Rhbdd1	rhomboid domain containing 1 [Source:MGI Symbol;Acc:MGI:1924117]	chr1:82316452-82445366|+	3.95539	4.94791	-0.362412	0.0206821	417.441
ENSMUSG00000028430	Nol6	nucleolar protein family 6 (RNA-associated) [Source:MGI Symbol;Acc:MGI:2140151]	chr4:41114427-41124455|-	4.08365	5.13486	-0.362433	0.0351024	361.941
ENSMUSG00000000732	Icosl	icos ligand [Source:MGI Symbol;Acc:MGI:1354701]	chr10:78069302-78083913|+	23.0614	28.9344	-0.362786	0.00180139	1641.15
ENSMUSG00000039219	Arid4b	AT rich interactive domain 4B (RBP1-like) [Source:MGI Symbol;Acc:MGI:2137512]	chr13:14063232-14199603|+	1.8109	2.28546	-0.362913	0.0743259	498.073
ENSMUSG00000030695	Aldoa	aldolase A, fructose-bisphosphate [Source:MGI Symbol;Acc:MGI:87994]	chr7:126795234-126809108|-	8.25621	10.3439	-0.363407	0.00536918	519.393
ENSMUSG00000027189	Trim44	tripartite motif-containing 44 [Source:MGI Symbol;Acc:MGI:1931835]	chr2:102300119-102407828|-	25.694	32.3187	-0.36386	0.0779426	2806.04
ENSMUSG00000046079	Lrrc8d	leucine rich repeat containing 8D [Source:MGI Symbol;Acc:MGI:1922368]	chr5:105699969-105832436|+	6.88029	8.64803	-0.363869	0.0117111	1297.02
ENSMUSG00000035181	Heatr5a	HEAT repeat containing 5A [Source:MGI Symbol;Acc:MGI:2444133]	chr12:51875871-51971321|-	3.36675	4.22764	-0.363933	0.0356977	1056.56
ENSMUSG00000037406	Htra4	HtrA serine peptidase 4 [Source:MGI Symbol;Acc:MGI:3036260]	chr8:25024929-25038962|-	14.4698	18.2132	-0.364203	0.0279045	552.766
ENSMUSG00000018377	Vezf1	vascular endothelial zinc finger 1 [Source:MGI Symbol;Acc:MGI:1313291]	chr11:88068279-88084729|+	23.9795	30.0981	-0.364208	0.0326774	1759.78
ENSMUSG00000024560	Cxxc1	CXXC finger 1 (PHD domain) [Source:MGI Symbol;Acc:MGI:1921572]	chr18:74216131-74221491|+	24.2534	30.4633	-0.365584	0.0181903	941.63
ENSMUSG00000041688	Amot	angiomotin [Source:MGI Symbol;Acc:MGI:108440]	chrX:145446425-145505181|-	1.53592	1.93455	-0.366124	0.0834933	274.361
ENSMUSG00000025793	Hgs	HGF-regulated tyrosine kinase substrate [Source:MGI Symbol;Acc:MGI:104681]	chr11:120467635-120483984|+	13.477	16.9747	-0.36631	0.0470646	677.259
ENSMUSG00000062929	Cfl2	cofilin 2, muscle [Source:MGI Symbol;Acc:MGI:101763]	chr12:54858809-54862877|-	38.8029	48.9078	-0.36696	0.0199199	2274.46
ENSMUSG00000037979	Ccdc92	coiled-coil domain containing 92 [Source:MGI Symbol;Acc:MGI:106485]	chr5:124834418-124862424|-	73.4799	92.4924	-0.367089	0.00416446	3040.71
ENSMUSG00000039218	Srrm2	serine/arginine repetitive matrix 2 [Source:MGI Symbol;Acc:MGI:1923206]	chr17:23790662-23824741|+	59.3958	74.8161	-0.368248	0.0104873	11015.1
ENSMUSG00000059981	Taok2	TAO kinase 2 [Source:MGI Symbol;Acc:MGI:1915919]	chr7:126865678-126884703|-	4.9372	6.2243	-0.368884	0.0183589	816.252
ENSMUSG00000091345	Col6a5	collagen, type VI, alpha 5 [Source:MGI Symbol;Acc:MGI:3648134]	chr9:105856078-105960643|-	2.55701	3.23938	-0.369896	0.0502688	432.622
ENSMUSG00000029651	Mtus2	microtubule associated tumor suppressor candidate 2 [Source:MGI Symbol;Acc:MGI:1915388]	chr5:147957320-148316065|+	11.431	14.4001	-0.370089	0.00054	2889.91
ENSMUSG00000027130	Slc12a6	solute carrier family 12, member 6 [Source:MGI Symbol;Acc:MGI:2135960]	chr2:112265825-112363163|+	1.60423	2.02616	-0.370184	0.0427123	250.084
ENSMUSG00000036499	Eea1	early endosome antigen 1 [Source:MGI Symbol;Acc:MGI:2442192]	chr10:95940650-96045518|+	23.4527	29.5584	-0.370304	0.00117027	4019.89
ENSMUSG00000020780	srp.68	signal recognition particle 68 [Source:MGI Symbol;Acc:MGI:1917447]	chr11:116245166-116274217|-	14.0048	17.7127	-0.371014	0.0649737	713.67
ENSMUSG00000033653	Vps8	VPS8 CORVET complex subunit [Source:MGI Symbol;Acc:MGI:2146407]	chr16:21423118-21644680|+	2.64484	3.33162	-0.37114	0.0343805	419.752
ENSMUSG00000004032	Gstm5	glutathione S-transferase, mu 5 [Source:MGI Symbol;Acc:MGI:1309466]	chr3:107895821-107898686|+	25.57	32.2271	-0.371179	0.0632555	665.76
ENSMUSG00000021193	Pitrm1	pitrilysin metallepetidase 1 [Source:MGI Symbol;Acc:MGI:1916867]	chr13:6548149-6580515|+	10.3019	12.9858	-0.37132	0.00251042	697.189
ENSMUSG00000038056	Kmt2c	lysine (K)-specific methyltransferase 2C [Source:MGI Symbol;Acc:MGI:2444959]	chr5:25271798-25498783|-	53.1378	67.0679	-0.372681	0.00047	19251.1
ENSMUSG00000001794	Capns1	calpain, small subunit 1 [Source:MGI Symbol;Acc:MGI:88266]	chr7:30186936-30198811|-	40.1966	50.8554	-0.372977	0.0147001	1492.06
ENSMUSG00000041417	Pik3r1	phosphatidylinositol 3-kinase, regulatory subunit, polypeptide 1 (p85 alpha) [Source:MGI Symbol;Acc:MGI:97583]	chr13:101680563-101768217|-	30.3115	38.3082	-0.373112	0.0136145	5350.86
ENSMUSG00000025519	Tktl2	transketolase-like 2 [Source:MGI Symbol;Acc:MGI:1921669]	chr8:66511756-66518335|+	5.56977	7.05933	-0.373329	0.0915045	550.611
ENSMUSG00000033396	Spg11	SPG11, spatacsin vesicle trafficking associated [Source:MGI Symbol;Acc:MGI:2444989]	chr2:122053520-122118386|-	2.05829	2.60747	-0.373578	0.0789524	250.948
ENSMUSG00000056429	Tgoln1	trans-golgi network protein [Source:MGI Symbol;Acc:MGI:105080]	chr6:72608432-72617000|-	4.46342	5.6389	-0.373924	0.0608628	417.16
ENSMUSG00000035575	Utp6	UTP6 small subunit processome component [Source:MGI Symbol;Acc:MGI:2445193]	chr11:79932321-79962390|-	7.20781	9.13524	-0.37432	0.0252386	591.79
ENSMUSG00000025510	Cd151	CD151 antigen [Source:MGI Symbol;Acc:MGI:1096360]	chr7:141467392-141471473|+	9.47358	12.0177	-0.374381	0.0430087	379.294
ENSMUSG00000024663	Rab3il1	RAB3A interacting protein (rabin3)-like 1 [Source:MGI Symbol;Acc:MGI:1922010]	chr19:10001669-10038380|+	4.90507	6.242	-0.376541	0.0719521	394.322
ENSMUSG00000048065	Cyb5r2	cytochrome b5 reductase 2 [Source:MGI Symbol;Acc:MGI:2444415]	chr7:107748455-107758032|-	14.3283	18.1378	-0.376592	0.0442684	579.65
ENSMUSG00000032115	Hyou1	hypoxia up-regulated 1 [Source:MGI Symbol;Acc:MGI:108030]	chr9:44379490-44392369|+	10.973	13.9429	-0.37685	0.0789524	1129.91
ENSMUSG00000042453	Reln	reelin [Source:MGI Symbol;Acc:MGI:103022]	chr5:21884454-22344702|-	2.58187	3.26903	-0.378245	0.000695	980.366
ENSMUSG00000020124	Usp15	ubiquitin specific peptidase 15 [Source:MGI Symbol;Acc:MGI:101857]	chr10:123105006-123196995|-	19.2592	24.4007	-0.378661	6.84e-05	6093.81
ENSMUSG00000062190	Lancl2	LanC (bacterial lantibiotic synthetase component C)-like 2 [Source:MGI Symbol;Acc:MGI:1919085]	chr6:57702540-57739439|+	9.89244	12.5612	-0.378745	0.00405678	536.724
ENSMUSG00000021114	Atp6v1d	ATPase, H+ transporting, lysosomal V1 subunit D [Source:MGI Symbol;Acc:MGI:1921084]	chr12:78840725-78861638|-	14.3063	18.1566	-0.379132	0.0176991	1255.26
ENSMUSG00000090673	Gm340	predicted gene 340 [Source:MGI Symbol;Acc:MGI:2685186]	chr19:41582370-41586536|+	4.64919	5.90744	-0.379295	0.0350841	321.768
ENSMUSG00000024855	Pacs1	phosphofurin acidic cluster sorting protein 1 [Source:MGI Symbol;Acc:MGI:1277113]	chr19:5133688-5273119|-	22.3879	28.4276	-0.37975	0.00215102	1620.83
ENSMUSG00000052812	Atad2b	ATPase family, AAA domain containing 2B [Source:MGI Symbol;Acc:MGI:2444798]	chr12:4917353-5047394|+	9.20141	11.6819	-0.37995	0.00610407	2625.7
ENSMUSG00000053226	Dand5	DAN domain family member 5, BMP antagonist [Source:MGI Symbol;Acc:MGI:1344365]	chr8:84815405-84822823|-	10.1792	12.9769	-0.380891	0.0901178	313.613
ENSMUSG00000041879	Ipo9	importin 9 [Source:MGI Symbol;Acc:MGI:1918944]	chr1:135382312-135430499|-	6.48671	8.24303	-0.381067	0.0146464	849.652
ENSMUSG00000006457	Actn3	actinin alpha 3 [Source:MGI Symbol;Acc:MGI:99678]	chr19:4861223-4877909|-	7.15937	9.12262	-0.38109	0.0332521	345.822
ENSMUSG00000025006	Sorbs1	sorbin and SH3 domain containing 1 [Source:MGI Symbol;Acc:MGI:700014]	chr19:40295049-40402267|-	54.2123	68.9187	-0.382293	0.00907151	2880.84
ENSMUSG00000027238	Frmd5	FERM domain containing 5 [Source:MGI Symbol;Acc:MGI:2442557]	chr2:121545529-121807087|-	4.01341	5.12447	-0.384129	0.0599993	416.857
ENSMUSG00000026251	Chrnd	cholinergic receptor, nicotinic, delta polypeptide [Source:MGI Symbol;Acc:MGI:87893]	chr1:87190607-87200070|+	11.0374	14.0739	-0.384244	0.0632372	499.084
ENSMUSG00000026672	Optn	optineurin [Source:MGI Symbol;Acc:MGI:1918898]	chr2:5020642-5064051|-	3.39222	4.3249	-0.386229	0.0999001	294.33
ENSMUSG00000018548	Trim37	tripartite motif-containing 37 [Source:MGI Symbol;Acc:MGI:2153072]	chr11:87127077-87220683|+	4.84862	6.17223	-0.38649	0.00888573	672.548
ENSMUSG00000040435	Ppp1r15a	protein phosphatase 1, regulatory (inhibitor) subunit 15A [Source:MGI Symbol;Acc:MGI:1927072]	chr7:45522916-45526268|-	13.4012	17.1172	-0.386997	0.0299801	532.462
ENSMUSG00000027422	Rrbp1	ribosome binding protein 1 [Source:MGI Symbol;Acc:MGI:1932395]	chr2:143947395-144011263|-	5.67262	7.25363	-0.387643	0.0562119	901.775
ENSMUSG00000025474	Tubgcp2	tubulin, gamma complex associated protein 2 [Source:MGI Symbol;Acc:MGI:1921487]	chr7:139995955-140036669|-	5.27702	6.73515	-0.3878	0.0332521	363.795
ENSMUSG00000033335	Dnm2	dynamin 2 [Source:MGI Symbol;Acc:MGI:109547]	chr9:21424908-21507759|+	9.20134	11.773	-0.389317	0.0249571	815.962
ENSMUSG00000040462	Os9	amplified in osteosarcoma [Source:MGI Symbol;Acc:MGI:1924301]	chr10:127095650-127121131|-	21.6853	27.7578	-0.389364	0.00244439	1158.63
ENSMUSG00000022400	Rbx1	ring-box 1 [Source:MGI Symbol;Acc:MGI:1891829]	chr15:81466316-81476369|+	8.87126	11.3719	-0.389599	0.0236601	469.102
ENSMUSG00000003033	Ap1m1	adaptor-related protein complex AP-1, mu subunit 1 [Source:MGI Symbol;Acc:MGI:102776]	chr8:72240018-72257385|+	5.47451	7.00617	-0.39017	0.0482449	393.27
ENSMUSG00000059409	Ppp2r5d	protein phosphatase 2, regulatory subunit B', delta [Source:MGI Symbol;Acc:MGI:2388481]	chr17:46682991-46705002|-	13.9946	17.9339	-0.391249	0.0103957	647.4
ENSMUSG00000026029	Casp8	caspase 8 [Source:MGI Symbol;Acc:MGI:1261423]	chr1:58795374-58847503|+	15.7827	20.2103	-0.3916	0.0253417	737.861
ENSMUSG00000072675	Duxbl2	double homeobox B-like 2 [Source:MGI Symbol;Acc:MGI:3710620]	chr14:26118349-26129763|+	18.2527	23.4324	-0.39305	0.0684409	1689.65
ENSMUSG00000072672	Duxbl3	double homeobox B-like 3 [Source:MGI Symbol;Acc:MGI:3710520]	chr14:26257962-26269436|+	17.136	22.0305	-0.395109	0.0649737	1697.56
ENSMUSG00000026155	Smap1	small ArfGAP 1 [Source:MGI Symbol;Acc:MGI:2138261]	chr1:23844846-23922317|-	4.66484	6.0086	-0.395113	0.0908495	312.982
ENSMUSG00000032512	Wdr48	WD repeat domain 48 [Source:MGI Symbol;Acc:MGI:1914811]	chr9:119894878-119926587|+	7.20477	9.25463	-0.395541	0.000164	1166.93
ENSMUSG00000029062	Cdk11b	cyclin-dependent kinase 11B [Source:MGI Symbol;Acc:MGI:88353]	chr4:155624854-155649938|+	40.5022	52.0983	-0.397683	0.0180397	2629.01
ENSMUSG00000056211	R3hdm1	R3H domain containing 1 [Source:MGI Symbol;Acc:MGI:2448514]	chr1:128103301-128237736|+	5.03857	6.50493	-0.40054	0.0448094	2685.46
ENSMUSG00000044378	Slc15a5	solute carrier family 15, member 5 [Source:MGI Symbol;Acc:MGI:3607714]	chr6:137983586-138079916|-	11.8532	15.2983	-0.401305	0.0303807	576.747
ENSMUSG00000017858	Ift52	intraflagellar transport 52 [Source:MGI Symbol;Acc:MGI:2387217]	chr2:163017354-163046141|+	3.82391	4.95036	-0.401987	0.0817206	206.748
ENSMUSG00000033847	Pla2g4c	phospholipase A2, group IVC (cytosolic, calcium-independent) [Source:MGI Symbol;Acc:MGI:1196403]	chr7:13324655-13360672|+	179.322	231.428	-0.402523	0.000808	12853.9
ENSMUSG00000045962	Wnk1	WNK lysine deficient protein kinase 1 [Source:MGI Symbol;Acc:MGI:2442092]	chr6:119923969-120038672|-	38.2071	49.2699	-0.402542	0.000176	16026.5
ENSMUSG00000033790	Tubgcp5	tubulin, gamma complex associated protein 5 [Source:MGI Symbol;Acc:MGI:2178836]	chr7:55794154-55831677|+	2.6122	3.37725	-0.404816	0.0102772	427.516
ENSMUSG00000006010	BC003331	cDNA sequence BC003331 [Source:MGI Symbol;Acc:MGI:2385108]	chr1:150361305-150393080|-	2.89161	3.76195	-0.405515	0.0332521	229.356
ENSMUSG00000025314	Ptprj	protein tyrosine phosphatase, receptor type, J [Source:MGI Symbol;Acc:MGI:104574]	chr2:90429754-90580647|-	17.8273	23.0221	-0.406563	1.43e-06	1987.33
ENSMUSG00000057236	Rbbp4	retinoblastoma binding protein 4, chromatin remodeling factor [Source:MGI Symbol;Acc:MGI:1194912]	chr4:129307100-129335370|-	1.94694	2.52389	-0.407586	0.0714217	298.868
ENSMUSG00000010453	Kansl3	KAT8 regulatory NSL complex subunit 3 [Source:MGI Symbol;Acc:MGI:1918055]	chr1:36335730-36369181|-	2.40852	3.12132	-0.408098	0.0490752	325.275
ENSMUSG00000033530	Ttc7b	tetratricopeptide repeat domain 7B [Source:MGI Symbol;Acc:MGI:2144724]	chr12:100300770-100520826|-	3.29973	4.29172	-0.408285	0.0900797	395.493
ENSMUSG00000033499	Larp4b	La ribonucleoprotein domain family, member 4B [Source:MGI Symbol;Acc:MGI:106330]	chr13:9093881-9174451|+	24.2377	31.4139	-0.409311	0.000121	3842.27
ENSMUSG00000023460	Rab12	RAB12, member RAS oncogene family [Source:MGI Symbol;Acc:MGI:894284]	chr17:66494512-66519717|-	6.39585	8.30097	-0.410053	0.0556209	361.531
ENSMUSG00000042268	Slc26a9	solute carrier family 26, member 9 [Source:MGI Symbol;Acc:MGI:2444594]	chr1:131744022-131771504|+	15.9493	20.742	-0.410186	0.0356977	1302.39
ENSMUSG00000028455	Stoml2	stomatin (Epb7.2)-like 2 [Source:MGI Symbol;Acc:MGI:1913842]	chr4:43027690-43031710|-	10.2978	13.3998	-0.41122	0.0913816	425.322
ENSMUSG00000057530	Ece1	endothelin converting enzyme 1 [Source:MGI Symbol;Acc:MGI:1101357]	chr4:137862237-137965229|+	10.5053	13.6543	-0.411233	0.0769254	891.373
ENSMUSG00000025278	Flnb	filamin, beta [Source:MGI Symbol;Acc:MGI:2446089]	chr14:7817957-7951588|+	35.0209	45.6225	-0.413699	0.0318571	4840.74
ENSMUSG00000020176	Grb10	growth factor receptor bound protein 10 [Source:MGI Symbol;Acc:MGI:103232]	chr11:11930508-12038683|-	4.69663	6.14439	-0.413705	0.0357284	716.311
ENSMUSG00000042744	Gm15800	predicted gene 15800 [Source:MGI Symbol;Acc:MGI:3647820]	chr5:121220219-121368577|+	6.24585	8.148	-0.418084	0.000207	1814.79
ENSMUSG00000021282	Eif5	eukaryotic translation initiation factor 5 [Source:MGI Symbol;Acc:MGI:95309]	chr12:111538016-111546752|+	38.0734	49.5908	-0.41861	3.24e-12	5108.24
ENSMUSG00000029917	C130060K24Rik	RIKEN cDNA C130060K24 gene [Source:MGI Symbol;Acc:MGI:2441881]	chr6:65381105-65458150|+	8.10532	10.612	-0.419431	0.00900522	607.584
ENSMUSG00000000131	Xpo6	exportin 6 [Source:MGI Symbol;Acc:MGI:2429950]	chr7:126101715-126200501|-	2.94183	3.8417	-0.419656	0.00919583	924.264
ENSMUSG00000028991	Mtor	mechanistic target of rapamycin (serine/threonine kinase) [Source:MGI Symbol;Acc:MGI:1928394]	chr4:148448611-148557683|+	7.18706	9.39267	-0.42031	0.000806	1149.79
ENSMUSG00000050272	Dscam	DS cell adhesion molecule [Source:MGI Symbol;Acc:MGI:1196281]	chr16:96592079-97170752|-	2.13826	2.80944	-0.422778	0.0435457	296.409
ENSMUSG00000084786	Ubl5	ubiquitin-like 5 [Source:MGI Symbol;Acc:MGI:1913427]	chr9:20642878-20647140|+	10.7205	14.0468	-0.423121	0.0101728	828.677
ENSMUSG00000030224	Strap	serine/threonine kinase receptor associated protein [Source:MGI Symbol;Acc:MGI:1329037]	chr6:137735078-137751932|+	15.1774	19.9335	-0.423178	0.0431997	936.604
ENSMUSG00000003226	Ranbp2	RAN binding protein 2 [Source:MGI Symbol;Acc:MGI:894323]	chr10:58446920-58494356|+	3.3647	4.40342	-0.424888	0.00996488	901.44
ENSMUSG00000066406	Akap13	A kinase (PRKA) anchor protein 13 [Source:MGI Symbol;Acc:MGI:2676556]	chr7:75455534-75754609|+	7.87144	10.3187	-0.426064	2.22e-06	2667.98
ENSMUSG00000022871	Fetub	fetuin beta [Source:MGI Symbol;Acc:MGI:1890221]	chr16:22918382-22939766|+	30.5141	40.2232	-0.426954	0.0412539	987.944
ENSMUSG00000020441	2310033P09Rik	RIKEN cDNA 2310033P09 gene [Source:MGI Symbol;Acc:MGI:1915112]	chr11:59208321-59210738|+	13.0571	17.123	-0.428209	0.0215186	320.478
ENSMUSG00000020048	Hsp90b1	heat shock protein 90, beta (Grp94), member 1 [Source:MGI Symbol;Acc:MGI:98817]	chr10:86690209-86705509|-	66.8886	87.7435	-0.428252	2.3e-05	4858.39
ENSMUSG00000020368	Canx	calnexin [Source:MGI Symbol;Acc:MGI:88261]	chr11:50293961-50325673|-	62.4505	81.9063	-0.428276	4.59e-08	4997.59
ENSMUSG00000020986	Sec23a	SEC23 homolog A, COPII coat complex component [Source:MGI Symbol;Acc:MGI:1349635]	chr12:58958383-59012017|-	16.1108	21.2072	-0.428482	0.00211044	1218.38
ENSMUSG00000001366	Fbxo9	f-box protein 9 [Source:MGI Symbol;Acc:MGI:1918788]	chr9:78081499-78109065|-	4.95556	6.55827	-0.430192	0.0894947	320.974
ENSMUSG00000038774	Ascc3	activating signal cointegrator 1 complex subunit 3 [Source:MGI Symbol;Acc:MGI:1925237]	chr10:50592669-50851485|+	2.68377	3.53962	-0.430842	0.0233546	805.692
ENSMUSG00000018707	Dync1h1	dynein cytoplasmic 1 heavy chain 1 [Source:MGI Symbol;Acc:MGI:103147]	chr12:110601452-110666945|+	1.47577	1.95002	-0.432864	0.0320767	454.092
ENSMUSG00000035597	Prpf39	pre-mRNA processing factor 39 [Source:MGI Symbol;Acc:MGI:104602]	chr12:65036333-65063386|+	1.43136	1.89604	-0.435174	0.0533864	303.18
ENSMUSG00000020914	Top2a	topoisomerase (DNA) II alpha [Source:MGI Symbol;Acc:MGI:98790]	chr11:98992943-99024189|-	9.40439	12.4323	-0.43526	0.0175661	1752.35
ENSMUSG00000044647	Csrnp3	cysteine-serine-rich nuclear protein 3 [Source:MGI Symbol;Acc:MGI:1925021]	chr2:65845767-66031546|+	2.21461	2.93612	-0.43649	0.00766273	524.119
ENSMUSG00000031930	Wwp2	WW domain containing E3 ubiquitin protein ligase 2 [Source:MGI Symbol;Acc:MGI:1914144]	chr8:107436365-107558595|+	2.19894	2.92259	-0.437665	0.0291053	362.188
ENSMUSG00000035248	Zcchc6	zinc finger, CCHC domain containing 6 [Source:MGI Symbol;Acc:MGI:2387179]	chr13:59771879-59823147|-	11.2512	14.8807	-0.440289	3.25e-05	1163.13
ENSMUSG00000019841	Rev3l	REV3 like, DNA directed polymerase zeta catalytic subunit [Source:MGI Symbol;Acc:MGI:1337131]	chr10:39732118-39875211|+	14.2911	18.9398	-0.440589	0.00205856	3209.72
ENSMUSG00000039178	Tbc1d19	TBC1 domain family, member 19 [Source:MGI Symbol;Acc:MGI:1914499]	chr5:53809606-53903965|+	24.8287	32.9716	-0.443936	0.000121	1341.67
ENSMUSG00000002345	Borcs8	BLOC-1 related complex subunit 8 [Source:MGI Symbol;Acc:MGI:1919618]	chr8:70139499-70167488|+	3.79593	5.10743	-0.445802	0.0675643	206.703
ENSMUSG00000040629	Mael	maelstrom spermatogenic transposon silencer [Source:MGI Symbol;Acc:MGI:2138453]	chr1:166201201-166238747|-	13.6832	18.2324	-0.445845	0.0271207	398.77
ENSMUSG00000020037	Rfx4	regulatory factor X, 4 (influences HLA class II expression) [Source:MGI Symbol;Acc:MGI:1918387]	chr10:84756062-84906538|+	1.95502	2.63045	-0.448051	0.0484778	198.685
ENSMUSG00000003037	Rab8a	RAB8A, member RAS oncogene family [Source:MGI Symbol;Acc:MGI:96960]	chr8:72161200-72183904|+	6.51953	8.70895	-0.448067	0.0111051	537.481
ENSMUSG00000024122	Pdpk1	3-phosphoinositide dependent protein kinase 1 [Source:MGI Symbol;Acc:MGI:1338068]	chr17:24073680-24150924|-	19.8885	26.5083	-0.449639	0.000137	4328.43
ENSMUSG00000020890	Gucy2e	guanylate cyclase 2e [Source:MGI Symbol;Acc:MGI:105123]	chr11:69218117-69237036|-	9.38388	12.5135	-0.452291	4.87e-07	1203.65
ENSMUSG00000027900	Dram2	DNA-damage regulated autophagy modulator 2 [Source:MGI Symbol;Acc:MGI:1914421]	chr3:106547798-106575890|+	7.10001	9.53048	-0.452551	0.0701167	413.244
ENSMUSG00000030314	Atg7	autophagy related 7 [Source:MGI Symbol;Acc:MGI:1921494]	chr6:114643097-114860614|+	2.08172	2.78709	-0.453578	0.0486466	245.064
ENSMUSG00000040249	Lrp1	low density lipoprotein receptor-related protein 1 [Source:MGI Symbol;Acc:MGI:96828]	chr10:127538161-127621148|-	7.99799	10.7065	-0.453769	0.000501	2256.32
ENSMUSG00000041638	Gcn1l1	GCN1 general control of amino-acid synthesis 1-like 1 (yeast) [Source:MGI Symbol;Acc:MGI:2444248]	chr5:115565254-115622654|+	4.07729	5.45707	-0.45402	0.00735359	1038.79
ENSMUSG00000024169	Ift140	intraflagellar transport 140 [Source:MGI Symbol;Acc:MGI:2146906]	chr17:25016091-25099495|+	1.23806	1.65768	-0.454874	0.0342975	176.544
ENSMUSG00000004565	Pnpla6	patatin-like phospholipase domain containing 6 [Source:MGI Symbol;Acc:MGI:1354723]	chr8:3515384-3544267|+	0.986784	1.32212	-0.455491	0.0330769	166.279
ENSMUSG00000038502	Ptov1	prostate tumor over expressed gene 1 [Source:MGI Symbol;Acc:MGI:1933946]	chr7:44863067-44869788|-	5.14349	6.89484	-0.45581	0.01466	415.754
ENSMUSG00000026972	Arrdc1	arrestin domain containing 1 [Source:MGI Symbol;Acc:MGI:2446136]	chr2:24925352-24935252|-	21.7428	29.2176	-0.45736	0.00255963	1080.97
ENSMUSG00000022124	Fbxl3	F-box and leucine-rich repeat protein 3 [Source:MGI Symbol;Acc:MGI:1354702]	chr14:103080239-103099566|-	6.74061	9.04464	-0.460237	0.00314992	622.423
ENSMUSG00000043940	Wdfy3	WD repeat and FYVE domain containing 3 [Source:MGI Symbol;Acc:MGI:1096875]	chr5:101832956-102069921|-	5.43122	7.29926	-0.460338	0.000308	1328.78
ENSMUSG00000063200	Nol7	nucleolar protein 7 [Source:MGI Symbol;Acc:MGI:1917328]	chr13:43398390-43407097|+	4.32034	5.85855	-0.461765	0.0455894	214.307
ENSMUSG00000020964	Sel1l	sel-1 suppressor of lin-12-like (C. elegans) [Source:MGI Symbol;Acc:MGI:1329016]	chr12:91806043-91849157|-	7.44513	10.026	-0.463052	0.000203	1063.97
ENSMUSG00000031819	Emc8	ER membrane protein complex subunit 8 [Source:MGI Symbol;Acc:MGI:1343095]	chr8:120653914-120668573|-	9.99942	13.4619	-0.463324	0.00679481	1161.56
ENSMUSG00000030226	Lmo3	LIM domain only 3 [Source:MGI Symbol;Acc:MGI:102810]	chr6:138362918-138581968|-	3.35151	4.55467	-0.463371	0.0491753	325.773
ENSMUSG00000030655	Smg1	SMG1 homolog, phosphatidylinositol 3-kinase-related kinase (C. elegans) [Source:MGI Symbol;Acc:MGI:1919742]	chr7:118131308-118243670|-	6.39218	8.59908	-0.463981	5.81e-07	2670.58
ENSMUSG00000027478	Dnmt3b	DNA methyltransferase 3B [Source:MGI Symbol;Acc:MGI:1261819]	chr2:153649450-153687730|+	4.35088	5.88663	-0.464018	0.00810212	414.993
ENSMUSG00000052212	Cd177	CD177 antigen [Source:MGI Symbol;Acc:MGI:1916141]	chr7:24743983-24760311|-	28.5711	38.4997	-0.464501	0.00215102	1305.96
ENSMUSG00000087260	Lamtor5	late endosomal/lysosomal adaptor, MAPK and MTOR activator 5 [Source:MGI Symbol;Acc:MGI:1915826]	chr3:107278858-107284082|+	14.1851	19.1788	-0.465634	0.0424514	225.008
ENSMUSG00000018001	Cyth3	cytohesin 3 [Source:MGI Symbol;Acc:MGI:1335107]	chr5:143622447-143710250|+	2.5135	3.39247	-0.465767	0.0103162	438.202
ENSMUSG00000034042	Gpbp1l1	GC-rich promoter binding protein 1-like 1 [Source:MGI Symbol;Acc:MGI:1924360]	chr4:116557658-116593882|+	8.61787	11.6654	-0.466123	6.48e-05	750.153
ENSMUSG00000026546	Cfap45	cilia and flagella associated protein 45 [Source:MGI Symbol;Acc:MGI:1919120]	chr1:172520801-172545870|+	2.5125	3.44203	-0.47269	0.0582643	304.227
ENSMUSG00000034707	Gns	glucosamine (N-acetyl)-6-sulfatase [Source:MGI Symbol;Acc:MGI:1922862]	chr10:121365090-121397249|+	2.0542	2.79354	-0.474322	0.00480064	315.566
ENSMUSG00000031461	Myom2	myomesin 2 [Source:MGI Symbol;Acc:MGI:1328358]	chr8:15057653-15133541|+	3.45082	4.69095	-0.474629	0.00123558	603.975
ENSMUSG00000079845	Xlr4a	X-linked lymphocyte-regulated 4A [Source:MGI Symbol;Acc:MGI:3574098]	chrX:73074345-73082478|-	15.113	20.5431	-0.474662	0.032073	442.25
ENSMUSG00000039834	Zfp335	zinc finger protein 335 [Source:MGI Symbol;Acc:MGI:2682313]	chr2:164891882-164911757|-	2.30388	3.16434	-0.477452	0.0649737	176.861
ENSMUSG00000023008	Fmnl3	formin-like 3 [Source:MGI Symbol;Acc:MGI:109569]	chr15:99317225-99370482|-	61.7444	84.2567	-0.477498	0.0127156	5465.04
ENSMUSG00000030835	Nomo1	nodal modulator 1 [Source:MGI Symbol;Acc:MGI:2385850]	chr7:46033698-46084212|+	1.9108	2.62736	-0.477615	0.0538693	196.245
ENSMUSG00000025586	Cpeb1	cytoplasmic polyadenylation element binding protein 1 [Source:MGI Symbol;Acc:MGI:108442]	chr7:81347026-81455465|-	47.3611	64.2857	-0.477966	3.02e-11	5727.06
ENSMUSG00000026860	Sh3glb2	SH3-domain GRB2-like endophilin B2 [Source:MGI Symbol;Acc:MGI:2385131]	chr2:30344809-30359337|-	2.10331	2.87284	-0.479164	0.0452895	154.282
ENSMUSG00000004328	Hif3a	hypoxia inducible factor 3, alpha subunit [Source:MGI Symbol;Acc:MGI:1859778]	chr7:17031507-17062427|-	7.28893	9.97225	-0.480705	0.028544	871.326
ENSMUSG00000029580	Actb	actin, beta [Source:MGI Symbol;Acc:MGI:87904]	chr5:142903115-142906754|-	20.1797	27.668	-0.482791	0.0111456	987.894
ENSMUSG00000020434	4921536K21Rik	RIKEN cDNA 4921536K21 gene [Source:MGI Symbol;Acc:MGI:1914680]	chr11:3886088-3895098|-	5.64018	7.7618	-0.483689	0.0528142	293.248
ENSMUSG00000056758	Hmga2	high mobility group AT-hook 2 [Source:MGI Symbol;Acc:MGI:101761]	chr10:120361275-120476469|-	4.35732	5.98827	-0.484862	0.0445296	585.565
ENSMUSG00000038685	Rtel1	regulator of telomere elongation helicase 1 [Source:MGI Symbol;Acc:MGI:2139369]	chr2:181319739-181356616|+	3.03194	4.14985	-0.485917	0.00824039	359.947
ENSMUSG00000018554	Ybx2	Y box protein 2 [Source:MGI Symbol;Acc:MGI:1096372]	chr11:69935796-69941605|+	52.7858	72.3397	-0.488682	0.000435	1781.19
ENSMUSG00000032285	Dnaja4	DnaJ heat shock protein family (Hsp40) member A4 [Source:MGI Symbol;Acc:MGI:1927638]	chr9:54698873-54716315|+	3.3183	4.60198	-0.490019	0.0350813	201.964
ENSMUSG00000024392	Bag6	BCL2-associated athanogene 6 [Source:MGI Symbol;Acc:MGI:1919439]	chr17:35135178-35147322|+	6.23047	8.60661	-0.495279	0.0166644	638.139
ENSMUSG00000026718	Stam	signal transducing adaptor molecule (SH3 domain and ITAM motif) 1 [Source:MGI Symbol;Acc:MGI:1329014]	chr2:14074098-14149634|+	1.43106	2.00451	-0.508831	0.00506618	274.409
ENSMUSG00000064284	Cdpf1	cysteine rich, DPF motif domain containing 1 [Source:MGI Symbol;Acc:MGI:1919605]	chr15:85806972-85811697|-	11.3297	15.8439	-0.51128	0.0865689	218.148
ENSMUSG00000029547	Ints1	integrator complex subunit 1 [Source:MGI Symbol;Acc:MGI:1915760]	chr5:139751282-139775674|-	2.18827	3.06804	-0.511329	0.00907151	292.882
ENSMUSG00000022946	Dopey2	dopey family member 2 [Source:MGI Symbol;Acc:MGI:1917278]	chr16:93711907-93810585|+	7.83852	10.9283	-0.511815	4.69e-05	901.102
ENSMUSG00000041849	Card6	caspase recruitment domain family, member 6 [Source:MGI Symbol;Acc:MGI:3032959]	chr15:5095981-5108539|-	5.57685	7.77258	-0.512127	0.00244439	691.857
ENSMUSG00000026479	Lamc2	laminin, gamma 2 [Source:MGI Symbol;Acc:MGI:99913]	chr1:153122756-153186447|-	1.40076	1.98903	-0.51549	0.090283	208.855
ENSMUSG00000028096	Gpr89	G protein-coupled receptor 89 [Source:MGI Symbol;Acc:MGI:1914799]	chr3:96868281-96905346|-	1.34037	1.88242	-0.51622	0.0430087	136.675
ENSMUSG00000078899	Gm4631	predicted gene 4631 [Source:MGI Symbol;Acc:MGI:3782813]	chr2:175321955-175338197|-	1.35623	1.91819	-0.516819	0.0839547	154.123
ENSMUSG00000032220	Myo1e	myosin IE [Source:MGI Symbol;Acc:MGI:106621]	chr9:70207350-70399766|+	8.54757	12.0268	-0.517295	0.0270761	899.468
ENSMUSG00000068323	Slc4a5	solute carrier family 4, sodium bicarbonate cotransporter, member 5 [Source:MGI Symbol;Acc:MGI:2443220]	chr6:83219828-83304945|+	5.37407	7.55899	-0.517323	0.00907151	512.104
ENSMUSG00000026950	Neb	nebulin [Source:MGI Symbol;Acc:MGI:97292]	chr2:52136647-52378474|-	2.69247	3.77526	-0.519784	0.00227284	1267.51
ENSMUSG00000018547	Pip4k2b	phosphatidylinositol-5-phosphate 4-kinase, type II, beta [Source:MGI Symbol;Acc:MGI:1934234]	chr11:97715157-97744704|-	1.34723	1.91948	-0.52418	0.0734097	145.457
ENSMUSG00000041670	Rims1	regulating synaptic membrane exocytosis 1 [Source:MGI Symbol;Acc:MGI:2152971]	chr1:22286251-22805994|-	7.10741	10.0563	-0.530308	0.00220692	1071.84
ENSMUSG00000050150	Slc9b1	solute carrier family 9, subfamily B (NHA1, cation proton antiporter 1), member 1 [Source:MGI Symbol;Acc:MGI:1921696]	chr3:135348029-135397827|+	8.24571	11.7097	-0.532367	0.0168517	494.918
ENSMUSG00000026571	Dcaf6	DDB1 and CUL4 associated factor 6 [Source:MGI Symbol;Acc:MGI:1921356]	chr1:165328698-165460475|-	4.60836	6.52461	-0.533731	0.00241079	546.032
ENSMUSG00000020838	Slc6a4	solute carrier family 6 (neurotransmitter transporter, serotonin), member 4 [Source:MGI Symbol;Acc:MGI:96285]	chr11:76998603-77032340|+	3.72345	5.31285	-0.534524	0.0354528	290.143
ENSMUSG00000027244	Atg13	autophagy related 13 [Source:MGI Symbol;Acc:MGI:1196429]	chr2:91674618-91710576|-	2.55061	3.65742	-0.537488	0.032543	199.483
ENSMUSG00000005672	Kit	KIT proto-oncogene receptor tyrosine kinase [Source:MGI Symbol;Acc:MGI:96677]	chr5:75574916-75656722|+	30.8198	43.7791	-0.542472	2.87e-13	4695.47
ENSMUSG00000022272	Myo10	myosin X [Source:MGI Symbol;Acc:MGI:107716]	chr15:25622525-25813673|+	46.7354	66.5667	-0.543612	3.66e-05	9176.85
ENSMUSG00000022587	Ly6e	lymphocyte antigen 6 complex, locus E [Source:MGI Symbol;Acc:MGI:106651]	chr15:74955051-74959905|+	10.3642	14.8503	-0.544315	0.00627572	729.895
ENSMUSG00000030750	Nsmce1	NSE1 homolog, SMC5-SMC6 complex component [Source:MGI Symbol;Acc:MGI:1914961]	chr7:125467640-125491596|-	8.67441	12.5598	-0.550795	0.0299524	351.41
ENSMUSG00000036550	Cnot1	CCR4-NOT transcription complex, subunit 1 [Source:MGI Symbol;Acc:MGI:2442402]	chr8:95719451-95807464|-	19.9313	28.5608	-0.55488	1.38e-12	5547.08
ENSMUSG00000033502	Cdc14a	CDC14 cell division cycle 14A [Source:MGI Symbol;Acc:MGI:2442676]	chr3:116272553-116424032|-	0.761388	1.1094	-0.555871	0.0729526	204.543
ENSMUSG00000027333	Smox	spermine oxidase [Source:MGI Symbol;Acc:MGI:2445356]	chr2:131491496-131525922|+	3.78239	5.45952	-0.560039	0.0149116	310.272
ENSMUSG00000024044	Epb41l3	erythrocyte membrane protein band 4.1 like 3 [Source:MGI Symbol;Acc:MGI:103008]	chr17:69156810-69289989|+	6.04353	8.75383	-0.56131	0.00662686	458.131
ENSMUSG00000033278	Ptprm	protein tyrosine phosphatase, receptor type, M [Source:MGI Symbol;Acc:MGI:102694]	chr17:66666848-67354459|-	3.44736	4.98706	-0.561955	0.00164276	315.888
ENSMUSG00000089917	Uckl1	uridine-cytidine kinase 1-like 1 [Source:MGI Symbol;Acc:MGI:1915806]	chr2:181569149-181584892|-	1.06047	1.54553	-0.564544	0.0890341	93.9677
ENSMUSG00000015647	Lama5	laminin, alpha 5 [Source:MGI Symbol;Acc:MGI:105382]	chr2:180176373-180225859|-	3.14359	4.60303	-0.56948	0.0270706	515.81
ENSMUSG00000053199	Arhgap20	Rho GTPase activating protein 20 [Source:MGI Symbol;Acc:MGI:2445175]	chr9:51765337-51853856|+	3.71519	5.39205	-0.570701	3.82e-06	935.507
ENSMUSG00000078897	Gm4724	predicted gene 4724 [Source:MGI Symbol;Acc:MGI:3782904]	chr2:175422300-175435807|-	2.00238	2.97236	-0.571527	0.0856623	129.653
ENSMUSG00000035372	1810055G02Rik	RIKEN cDNA 1810055G02 gene [Source:MGI Symbol;Acc:MGI:1919306]	chr19:3708333-3717881|+	37.8558	55.257	-0.572135	0.0117029	1040.21
ENSMUSG00000022311	Csmd3	CUB and Sushi multiple domains 3 [Source:MGI Symbol;Acc:MGI:2386403]	chr15:47580637-48792063|-	1.09652	1.6132	-0.578575	0.0528142	306.888
ENSMUSG00000033222	Ttf2	transcription termination factor, RNA polymerase II [Source:MGI Symbol;Acc:MGI:1921294]	chr3:100938860-100969663|-	0.981523	1.44469	-0.57864	0.0119573	181.898
ENSMUSG00000036644	Tbc1d9b	TBC1 domain family, member 9B [Source:MGI Symbol;Acc:MGI:1924045]	chr11:50131396-50172785|+	1.34643	1.97312	-0.579547	0.0649737	158.237
ENSMUSG00000066036	Ubr4	ubiquitin protein ligase E3 component n-recognin 4 [Source:MGI Symbol;Acc:MGI:1916366]	chr4:139352609-139489588|+	5.71636	8.35896	-0.582206	1.13e-06	1650.55
ENSMUSG00000025823	Pdia4	protein disulfide isomerase associated 4 [Source:MGI Symbol;Acc:MGI:104864]	chr6:47796141-47813430|-	25.8322	37.9307	-0.583888	0.000806	958.067
ENSMUSG00000019849	Prep	prolyl endopeptidase [Source:MGI Symbol;Acc:MGI:1270863]	chr10:45067203-45167198|+	10.394	15.2325	-0.587408	2.4e-08	1798.81
ENSMUSG00000079108	Srp54b	signal recognition particle 54B [Source:MGI Symbol;Acc:MGI:3714357]	chr12:55230168-55263836|+	63.7877	93.6164	-0.587523	3.45e-09	4780.29
ENSMUSG00000078881	Gm14434	predicted gene 14434 [Source:MGI Symbol;Acc:MGI:3702417]	chr2:176473278-176486783|-	1.87895	2.83095	-0.587936	0.08314	127.884
ENSMUSG00000054555	Adam12	a disintegrin and metallopeptidase domain 12 (meltrin alpha) [Source:MGI Symbol;Acc:MGI:105378]	chr7:133883199-134232146|-	1.90546	2.86064	-0.599805	0.00314992	388.388
ENSMUSG00000027642	Rpn2	ribophorin II [Source:MGI Symbol;Acc:MGI:98085]	chr2:157279017-157326319|+	4.2866	6.40052	-0.599846	0.00047	418.938
ENSMUSG00000023050	Map3k12	mitogen-activated protein kinase kinase kinase 12 [Source:MGI Symbol;Acc:MGI:1346881]	chr15:102497649-102517064|-	1.00352	1.5059	-0.60022	0.0443207	187.996
ENSMUSG00000000631	Myo18a	myosin XVIIIA [Source:MGI Symbol;Acc:MGI:2667185]	chr11:77763246-77865980|+	3.63356	5.39501	-0.600243	0.000544	1193.5
ENSMUSG00000022443	Myh9	myosin, heavy polypeptide 9, non-muscle [Source:MGI Symbol;Acc:MGI:107717]	chr15:77760587-77842175|-	3.9307	5.83855	-0.601952	1.26e-05	1028.56
ENSMUSG00000035095	Fam167a	family with sequence similarity 167, member A [Source:MGI Symbol;Acc:MGI:3606565]	chr14:63436394-63465498|+	8.23173	12.2395	-0.602235	0.000199	569.091
ENSMUSG00000006818	Sod2	superoxide dismutase 2, mitochondrial [Source:MGI Symbol;Acc:MGI:98352]	chr17:13007839-13018119|+	1.43942	2.17085	-0.605242	0.0318571	157.102
ENSMUSG00000028069	Gpatch4	G patch domain containing 4 [Source:MGI Symbol;Acc:MGI:1913864]	chr3:88043108-88055993|+	2.76283	4.1752	-0.607301	0.0453602	138.318
ENSMUSG00000032042	Srpr	signal recognition particle receptor ('docking protein') [Source:MGI Symbol;Acc:MGI:1914648]	chr9:35200175-35247973|+	2.87447	4.31931	-0.609297	0.0262008	229.506
ENSMUSG00000037846	Rtkn2	rhotekin 2 [Source:MGI Symbol;Acc:MGI:2158417]	chr10:67979570-68059740|+	0.751286	1.14471	-0.615656	0.0465892	96.6289
ENSMUSG00000027855	Sycp1	synaptonemal complex protein 1 [Source:MGI Symbol;Acc:MGI:105931]	chr3:102818499-102936100|-	1.75473	2.69711	-0.617159	0.0830913	126.237
ENSMUSG00000078880	Gm14308	predicted gene 14308 [Source:MGI Symbol;Acc:MGI:3782921]	chr2:176613364-176636344|-	1.49076	2.29655	-0.617474	0.0657105	128.66
ENSMUSG00000087444	Gm5475	predicted gene 5475 [Source:MGI Symbol;Acc:MGI:3646320]	chr15:100422147-100428150|+	1.55924	2.37999	-0.623637	0.0505426	99.7894
ENSMUSG00000050840	Cdh20	cadherin 20 [Source:MGI Symbol;Acc:MGI:1346069]	chr1:104768529-104995481|+	3.83588	5.85732	-0.626777	0.0150499	319.472
ENSMUSG00000028488	Sh3gl2	SH3-domain GRB2-like 2 [Source:MGI Symbol;Acc:MGI:700009]	chr4:85205126-85639195|+	0.821186	1.25205	-0.628974	0.0729159	122.582
ENSMUSG00000026697	Myoc	myocilin [Source:MGI Symbol;Acc:MGI:1202864]	chr1:162639155-162649693|+	2.166	3.34922	-0.633801	0.0620582	88.5535
ENSMUSG00000073079	Srp54a	signal recognition particle 54A [Source:MGI Symbol;Acc:MGI:1346087]	chr12:55080262-55115367|+	51.2818	77.8917	-0.635752	1.1e-08	5774.63
ENSMUSG00000027794	Sohlh2	spermatogenesis and oogenesis specific basic helix-loop-helix 2 [Source:MGI Symbol;Acc:MGI:1921684]	chr3:55182028-55209957|+	3.29361	5.07211	-0.638627	0.00564011	134.983
ENSMUSG00000047496	Rnf152	ring finger protein 152 [Source:MGI Symbol;Acc:MGI:2443787]	chr1:105276914-105356710|-	1.38045	2.14015	-0.644604	0.019168	205.388
ENSMUSG00000042581	Thsd7b	thrombospondin, type I, domain containing 7B [Source:MGI Symbol;Acc:MGI:2443925]	chr1:129273302-130219278|+	1.22627	1.89705	-0.645829	0.0122423	323.672
ENSMUSG00000038664	Herc1	HECT and RLD domain containing E3 ubiquitin protein ligase family member 1 [Source:MGI Symbol;Acc:MGI:2384589]	chr9:66350450-66508775|+	1.73991	2.66531	-0.647424	2.57e-08	997.02
ENSMUSG00000062040	Zfp27	zinc finger protein 27 [Source:MGI Symbol;Acc:MGI:99174]	chr7:29893333-29906572|-	2.38408	3.71009	-0.659395	0.00138283	188.846
ENSMUSG00000067288	Rps28	ribosomal protein S28 [Source:MGI Symbol;Acc:MGI:1859516]	chr17:33819027-33824562|-	1.8192	2.8797	-0.662509	0.0673034	160.851
ENSMUSG00000071862	Lrrtm2	leucine rich repeat transmembrane neuronal 2 [Source:MGI Symbol;Acc:MGI:2389174]	chr18:35209011-35215024|-	3.75366	5.87335	-0.66846	0.00146983	299.656
ENSMUSG00000090841	Myl6	myosin, light polypeptide 6, alkali, smooth muscle and non-muscle [Source:MGI Symbol;Acc:MGI:109318]	chr10:128490860-128494145|-	2.43965	3.85776	-0.66856	0.0332521	183.843
ENSMUSG00000042246	Tmc7	transmembrane channel-like gene family 7 [Source:MGI Symbol;Acc:MGI:2443317]	chr7:118535841-118584736|-	3.49457	5.54188	-0.673086	0.0282606	274.783
ENSMUSG00000022637	Cblb	Casitas B-lineage lymphoma b [Source:MGI Symbol;Acc:MGI:2146430]	chr16:52031549-52208047|+	0.603166	0.966118	-0.673554	0.0622342	74.2944
ENSMUSG00000112449	Srp54a	signal recognition particle 54A [Source:MGI Symbol;Acc:MGI:1346087]	chr12:55155104-55189573|+	54.0673	84.9241	-0.683212	3.29e-09	5269.33
ENSMUSG00000094475	Gm11007	predicted gene 11007 [Source:MGI Symbol;Acc:MGI:3779223]	chr2:175643978-175653860|+	2.87185	4.62914	-0.685319	0.0320767	103.908
ENSMUSG00000023088	Abcc1	ATP-binding cassette, sub-family C (CFTR/MRP), member 1 [Source:MGI Symbol;Acc:MGI:102676]	chr16:14361558-14475737|+	1.87635	2.98499	-0.693175	0.000199	403.026
ENSMUSG00000061086	Myl4	myosin, light polypeptide 4 [Source:MGI Symbol;Acc:MGI:97267]	chr11:104550663-104595753|+	0.560082	0.915079	-0.694885	0.0581464	62.1167
ENSMUSG00000095648	Gm2004	predicted gene 2004 [Source:MGI Symbol;Acc:MGI:3780174]	chr2:176141591-176149825|-	2.06782	3.35614	-0.70645	0.0327174	86.6782
ENSMUSG00000093674	Rpl41	ribosomal protein L41 [Source:MGI Symbol;Acc:MGI:1915195]	chr10:128548114-128549305|-	26.9844	44.1446	-0.711568	0.0320767	1401.28
ENSMUSG00000094932	Gm2007	predicted gene 2007 [Source:MGI Symbol;Acc:MGI:3780177]	chr2:175741537-175751419|+	2.78311	4.59459	-0.715568	0.0288689	103.22
ENSMUSG00000078875	Gm14419	predicted gene 14419 [Source:MGI Symbol;Acc:MGI:3702410]	chr2:177000956-177012787|+	1.49329	2.44651	-0.715687	0.0274327	99.7727
ENSMUSG00000078877	Gm14295	predicted gene 14295 [Source:MGI Symbol;Acc:MGI:3709624]	chr2:176798612-176811223|+	1.99186	3.31717	-0.738276	0.00617631	171.511
ENSMUSG00000094103	1700047I17Rik2	RIKEN cDNA 1700047I17 gene 2 [Source:MGI Symbol;Acc:MGI:3714351]	chr12:55199592-55217168|+	18.2942	30.1929	-0.747244	2.65e-06	1606.75
ENSMUSG00000095595	Fam177a	family with sequence similarity 177, member A [Source:MGI Symbol;Acc:MGI:1920635]	chr12:55124469-55142104|+	17.8731	29.5678	-0.750464	2.51e-06	1595.42
ENSMUSG00000071711	Mpst	mercaptopyruvate sulfurtransferase [Source:MGI Symbol;Acc:MGI:2179733]	chr15:78406712-78414002|+	1.63804	2.80953	-0.757148	0.0921148	53.731
ENSMUSG00000014329	Bicc1	BicC family RNA binding protein 1 [Source:MGI Symbol;Acc:MGI:1933388]	chr10:70922832-71159700|-	1.07353	1.79044	-0.769835	0.000155	194.631
ENSMUSG00000091405	Hist2h4	histone cluster 2, H4 [Source:MGI Symbol;Acc:MGI:2140113]	chr3:96261682-96263311|-	1.32501	2.34527	-0.778959	0.0719521	55.1737
ENSMUSG00000036188	Ankmy2	ankyrin repeat and MYND domain containing 2 [Source:MGI Symbol;Acc:MGI:2144755]	chr12:36157114-36197291|+	0.284204	0.515378	-0.8023	0.0876116	49.5042
ENSMUSG00000027994	Mcub	mitochondrial calcium uniporter dominant negative beta subunit [Source:MGI Symbol;Acc:MGI:1914065]	chr3:129914960-129970206|-	1.38333	2.45995	-0.80645	0.0599993	48.2171
ENSMUSG00000024421	Lama3	laminin, alpha 3 [Source:MGI Symbol;Acc:MGI:99909]	chr18:12333819-12583013|+	0.189833	0.343246	-0.814194	0.0649737	46.3611
ENSMUSG00000026601	Axdnd1	axonemal dynein light chain domain containing 1 [Source:MGI Symbol;Acc:MGI:1924602]	chr1:156323509-156421159|-	1.06048	1.86559	-0.825477	0.0011215	135.201
ENSMUSG00000079445	B3gnt7	UDP-GlcNAc:betaGal beta-1,3-N-acetylglucosaminyltransferase 7 [Source:MGI Symbol;Acc:MGI:2384394]	chr1:86302832-86307305|+	1.33378	2.40462	-0.826684	0.0183589	100.953
ENSMUSG00000029826	Zc3hav1	zinc finger CCCH type, antiviral 1 [Source:MGI Symbol;Acc:MGI:1926031]	chr6:38305286-38354603|-	0.384725	0.719751	-0.849116	0.0449739	61.4234
ENSMUSG00000041923	Nol4	nucleolar protein 4 [Source:MGI Symbol;Acc:MGI:2441684]	chr18:22693181-23041653|-	0.448813	0.827589	-0.853001	0.0289478	60.5554
ENSMUSG00000060143	Gm10076	predicted gene 10076 [Source:MGI Symbol;Acc:MGI:3704451]	chr14:105681828-105682211|+	29.3509	53.186	-0.863428	0.000439	507.579
ENSMUSG00000037086	Prr32	proline rich 32 [Source:MGI Symbol;Acc:MGI:1916050]	chrX:45090904-45092791|+	4.75255	9.00478	-0.878438	0.0319752	126.312
ENSMUSG00000030862	Cpxm2	carboxypeptidase X 2 (M14 family) [Source:MGI Symbol;Acc:MGI:1926006]	chr7:132032687-132154739|-	2.41374	4.44141	-0.897932	2.26e-05	238.896
ENSMUSG00000016487	Ppfibp1	PTPRF interacting protein, binding protein 1 (liprin beta 1) [Source:MGI Symbol;Acc:MGI:1914783]	chr6:146888487-147032025|+	1.85468	3.46091	-0.907235	0.000301	554.665
ENSMUSG00000027016	Zfp385b	zinc finger protein 385B [Source:MGI Symbol;Acc:MGI:2444734]	chr2:77410634-77819639|-	1.06485	2.00256	-0.908348	0.00127022	171.565
ENSMUSG00000063971	Krt88	keratin 88 [Source:MGI Symbol;Acc:MGI:1913572]	chr15:101447745-101453909|+	3.71005	7.23137	-0.916918	0.0294766	87.7391
ENSMUSG00000026725	Tnn	tenascin N [Source:MGI Symbol;Acc:MGI:2665790]	chr1:160085029-160153580|-	0.250813	0.514432	-0.929484	0.0894947	31.2539
ENSMUSG00000059970	Hspa2	heat shock protein 2 [Source:MGI Symbol;Acc:MGI:96243]	chr12:76404176-76406938|+	1.06484	2.0858	-0.942104	0.00843783	69.6393
ENSMUSG00000047497	Adamts12	a disintegrin-like and metallopeptidase (reprolysin type) with thrombospondin type 1 motif, 12 [Source:MGI Symbol;Acc:MGI:2146046]	chr15:11064790-11346867|+	0.213937	0.464839	-0.950497	0.0963264	55.7381
ENSMUSG00000037139	Myom3	myomesin family, member 3 [Source:MGI Symbol;Acc:MGI:2685280]	chr4:135759715-135815564|+	0.212461	0.455278	-0.984528	0.0583847	33.302
ENSMUSG00000041797	Abca9	ATP-binding cassette, sub-family A (ABC1), member 9 [Source:MGI Symbol;Acc:MGI:2386796]	chr11:110100749-110168196|-	0.646685	1.28729	-0.987485	0.000122	106.748
ENSMUSG00000038569	Rad9b	RAD9 checkpoint clamp component B [Source:MGI Symbol;Acc:MGI:2385231]	chr5:122323223-122354233|-	0.237823	0.530715	-1.03677	0.0620682	30.2187
ENSMUSG00000024049	Myom1	myomesin 1 [Source:MGI Symbol;Acc:MGI:1341430]	chr17:71019521-71126856|+	0.197302	0.452116	-1.07555	0.0318571	32.3434
ENSMUSG00000033781	Asb13	ankyrin repeat and SOCS box-containing 13 [Source:MGI Symbol;Acc:MGI:2145525]	chr13:3634032-3653822|+	0.200675	0.485936	-1.08294	0.0531076	37.8395
ENSMUSG00000017760	Ctsa	cathepsin A [Source:MGI Symbol;Acc:MGI:97748]	chr2:164832873-164841032|+	0.174014	0.433027	-1.11351	0.0649737	25.1967
ENSMUSG00000030427	Lilra6	leukocyte immunoglobulin-like receptor, subfamily A (with TM domain), member 6 [Source:MGI Symbol;Acc:MGI:1195969]	chr7:3908280-3915503|-	0.334544	0.885765	-1.18325	0.0314313	30.1568
ENSMUSG00000075046	Duxf3	double homeobox family member 3 [Source:MGI Symbol;Acc:MGI:1921649]	chr10:58229979-58232675|-	0.0769295	0.277347	-1.30217	0.0320767	62.2405
ENSMUSG00000041920	Slc16a6	solute carrier family 16 (monocarboxylic acid transporters), member 6 [Source:MGI Symbol;Acc:MGI:2144585]	chr11:109450855-109473598|-	0.211595	0.601841	-1.32058	0.00940145	41.9001
ENSMUSG00000064360	mt-Nd3	mitochondrially encoded NADH dehydrogenase 3 [Source:MGI Symbol;Acc:MGI:102499]	chrM:9459-9806|+	58.7775	223.53	-1.48636	0.0182613	1007.6
ENSMUSG00000063458	1700112E06Rik	RIKEN cDNA 1700112E06 gene [Source:MGI Symbol;Acc:MGI:1923883]	chr14:22019712-23056085|+	0.00969217	1.23379	-1.87891	0.000194	41.8774
ENSMUSG00000034724	Cnot6l	CCR4-NOT transcription complex, subunit 6-like [Source:MGI Symbol;Acc:MGI:2443154]	chr5:96070333-96164171|-	0.582432	73.0917	-6.88559	0	4045.67
