# Supplementary material for: Role of Cnot6l in maternal mRNA turnover
Source: Life Sci Alliance. 2018 Jul 16;1(4):e201800084. doi: 10.26508/lsa.201800084 (PMC6238536; doi:10.26508/lsa.201800084)
Supplement: Supplementary file 3 [file LSA-2018-00084_TableS3.xlsx]

## Sheet: 2018 CNOT6L Table S3 - 1C diffe
ENSEMBL gene ID	gene name	gene description	coordinates mm10	MII KO FPKM	MII WT FPKM	log2FoldChange (DESeq2)	adjusted p-value (DESeq2)	mean of normalized counts (DESeq2)
ENSMUSG00000091625	Lsm5	LSM5 homolog, U6 small nuclear RNA and mRNA degradation associated [Source:MGI Symbol;Acc:MGI:1913623]	chr6:56701063-56704710|-	34.7078	4.62195	2.81091	3.29e-45	330.473
ENSMUSG00000069867	Pabpn1l	poly(A)binding protein nuclear 1-like [Source:MGI Symbol;Acc:MGI:2685954]	chr8:122619471-122622739|-	27.1736	5.8893	2.11717	2.19e-22	387.375
ENSMUSG00000036611	Eepd1	endonuclease/exonuclease/phosphatase family domain containing 1 [Source:MGI Symbol;Acc:MGI:1914734]	chr9:25481547-25604110|+	4.81515	1.04557	2.09635	3.26e-18	239.349
ENSMUSG00000036840	Siah1a	seven in absentia 1A [Source:MGI Symbol;Acc:MGI:108064]	chr8:86724007-86745934|-	72.6204	18.4072	1.9719	4.21e-123	1682.49
ENSMUSG00000007892	Rplp1	ribosomal protein, large, P1 [Source:MGI Symbol;Acc:MGI:1927099]	chr9:61913284-61914542|-	26.4179	6.71653	1.84983	4.26e-13	530.577
ENSMUSG00000017778	Cox7c	cytochrome c oxidase subunit VIIc [Source:MGI Symbol;Acc:MGI:103226]	chr13:86044816-86046904|-	2.102	0.436109	1.84783	2.19e-09	570.904
ENSMUSG00000026032	Ndufb3	NADH dehydrogenase (ubiquinone) 1 beta subcomplex 3 [Source:MGI Symbol;Acc:MGI:1913745]	chr1:58586384-58595964|+	11.5269	3.00255	1.84449	1.5e-12	158.909
ENSMUSG00000042541	Sem1	SEM1, 26S proteasome complex subunit [Source:MGI Symbol;Acc:MGI:109238]	chr6:6557294-6578663|-	3.76092	1.02088	1.83982	6.8e-24	198.964
ENSMUSG00000022367	Has2	hyaluronan synthase 2 [Source:MGI Symbol;Acc:MGI:107821]	chr15:56665627-56694539|-	0.731688	0.152597	1.81057	0.000417	28.9094
ENSMUSG00000027703	Lrriq4	leucine-rich repeats and IQ motif containing 4 [Source:MGI Symbol;Acc:MGI:1915557]	chr3:30644507-30672431|+	2.40551	0.421626	1.78085	0.00309212	61.4672
ENSMUSG00000030751	Psma1	proteasome (prosome, macropain) subunit, alpha type 1 [Source:MGI Symbol;Acc:MGI:1347005]	chr7:114264606-114276118|-	16.9519	4.89683	1.75609	5.05e-29	598.779
ENSMUSG00000061613	U2af1	U2 small nuclear ribonucleoprotein auxiliary factor (U2AF) 1 [Source:MGI Symbol;Acc:MGI:98884]	chr17:31647082-31658754|-	26.4011	7.71086	1.74098	6.1e-36	410.682
ENSMUSG00000031823	Zdhhc7	zinc finger, DHHC domain containing 7 [Source:MGI Symbol;Acc:MGI:2142662]	chr8:120080890-120101482|-	8.2676	2.50617	1.68009	1.22e-29	581.806
ENSMUSG00000022304	Dpys	dihydropyrimidinase [Source:MGI Symbol;Acc:MGI:1928679]	chr15:39768485-39857470|-	4.65226	1.44035	1.60577	1.07e-10	189.008
ENSMUSG00000090733	Rps27	ribosomal protein S27 [Source:MGI Symbol;Acc:MGI:1888676]	chr3:90212522-90213651|-	1.14519	0.275269	1.59024	5.11e-06	282.256
ENSMUSG00000074361	C5ar2	complement component 5a receptor 2 [Source:MGI Symbol;Acc:MGI:2442013]	chr7:16234585-16244154|-	0.622385	0.168394	1.58509	0.000532	34.6373
ENSMUSG00000020630	Rnaseh1	ribonuclease H1 [Source:MGI Symbol;Acc:MGI:1335073]	chr12:28649602-28659589|+	11.8046	3.94253	1.55921	2.73e-31	427.077
ENSMUSG00000026049	Tex30	testis expressed 30 [Source:MGI Symbol;Acc:MGI:1922873]	chr1:44086613-44102441|-	8.63045	2.94892	1.51754	6.66e-21	304.515
ENSMUSG00000069874	Irgm2	immunity-related GTPase family M member 2 [Source:MGI Symbol;Acc:MGI:1926262]	chr11:58199618-58222782|+	3.1469	0.733457	1.51551	0.0176258	95.1405
ENSMUSG00000028410	Dnaja1	DnaJ heat shock protein family (Hsp40) member A1 [Source:MGI Symbol;Acc:MGI:1270129]	chr4:40722150-40737149|+	122.917	43.1966	1.50412	5.57e-74	15049.6
ENSMUSG00000060019	Gm10073	predicted pseudogene 10073 [Source:MGI Symbol;Acc:MGI:3641908]	chr8:106572966-106573461|-	1.7206	0.40618	1.5013	0.00316947	33.4858
ENSMUSG00000014075	Tctex1d2	Tctex1 domain containing 2 [Source:MGI Symbol;Acc:MGI:1913311]	chr16:32419702-32429099|+	5.89688	2.02006	1.49852	1.45e-11	196.555
ENSMUSG00000017802	Fam134c	family with sequence similarity 134, member C [Source:MGI Symbol;Acc:MGI:1915248]	chr11:101096322-101119893|-	0.925745	0.280456	1.48422	2.86e-06	269.31
ENSMUSG00000023571	C1qtnf12	C1q and tumor necrosis factor related 12 [Source:MGI Symbol;Acc:MGI:1914639]	chr4:155962318-155966629|+	3.92629	1.31569	1.48007	1.79e-09	186.598
ENSMUSG00000032518	Rpsa	ribosomal protein SA [Source:MGI Symbol;Acc:MGI:105381]	chr9:120127689-120132369|+	1.60666	0.490612	1.46958	0.000193	341.355
ENSMUSG00000051579	Tceal8	transcription elongation factor A (SII)-like 8 [Source:MGI Symbol;Acc:MGI:1913934]	chrX:136168984-136172342|-	1.7347	0.518521	1.43447	0.00617642	46.6902
ENSMUSG00000069899	Gm12166	predicted gene 12166 [Source:MGI Symbol;Acc:MGI:3650635]	chr11:46051354-46052321|-	8.44603	2.94615	1.42471	2.32e-07	108.616
ENSMUSG00000052033	Pfdn4	prefoldin 4 [Source:MGI Symbol;Acc:MGI:1923512]	chr2:170496428-170519123|+	197.185	73.4875	1.41375	5.36e-29	4711.6
ENSMUSG00000024208	Uqcc2	ubiquinol-cytochrome c reductase complex assembly factor 2 [Source:MGI Symbol;Acc:MGI:1914517]	chr17:27122663-27133916|-	0.973672	0.265047	1.40328	0.00119298	70.7401
ENSMUSG00000019874	Fabp7	fatty acid binding protein 7, brain [Source:MGI Symbol;Acc:MGI:101916]	chr10:57784881-57788450|+	2.4983	0.835919	1.38826	0.0004	48.7666
ENSMUSG00000054717	Hmgb2	high mobility group box 2 [Source:MGI Symbol;Acc:MGI:96157]	chr8:57511907-57515999|+	235.03	90.2696	1.38302	4.22e-51	9181.54
ENSMUSG00000022889	Mrpl39	mitochondrial ribosomal protein L39 [Source:MGI Symbol;Acc:MGI:1351620]	chr16:84717576-84735742|-	4.29072	1.56453	1.38028	2.93e-08	308.838
ENSMUSG00000021832	Psmc6	proteasome (prosome, macropain) 26S subunit, ATPase, 6 [Source:MGI Symbol;Acc:MGI:1914339]	chr14:45329824-45349071|+	29.5766	11.494	1.3558	3.88e-40	541.541
ENSMUSG00000026078	Pdcl3	phosducin-like 3 [Source:MGI Symbol;Acc:MGI:1916083]	chr1:38985608-38997238|+	19.7515	7.68141	1.35232	7.74e-43	1152.3
ENSMUSG00000051495	Irf2bp2	interferon regulatory factor 2 binding protein 2 [Source:MGI Symbol;Acc:MGI:2443921]	chr8:126588296-126593986|-	0.688047	0.252312	1.33822	1.5e-05	185.811
ENSMUSG00000042258	Isl1	ISL1 transcription factor, LIM/homeodomain [Source:MGI Symbol;Acc:MGI:101791]	chr13:116298281-116309689|-	0.98685	0.358905	1.33327	0.000714	38.2551
ENSMUSG00000050621	Rps27rt	ribosomal protein S27, retrogene [Source:MGI Symbol;Acc:MGI:3704345]	chr9:114982366-114982739|-	0.647143	0.0432594	1.31864	0.0153808	29.7365
ENSMUSG00000060548	Tnfrsf19	tumor necrosis factor receptor superfamily, member 19 [Source:MGI Symbol;Acc:MGI:1352474]	chr14:60963834-61046855|-	0.259552	0.0712554	1.31661	0.0200856	25.0504
ENSMUSG00000095280	Gm21738	predicted gene, 21738 [Source:MGI Symbol;Acc:MGI:5433902]	chr14:19415857-19418930|-	25.9055	8.8662	1.30732	0.0153843	138.957
ENSMUSG00000018507	Trpv2	transient receptor potential cation channel, subfamily V, member 2 [Source:MGI Symbol;Acc:MGI:1341836]	chr11:62574486-62600515|+	0.292909	0.0983553	1.29115	0.00556144	23.2487
ENSMUSG00000051627	Hist1h1e	histone cluster 1, H1e [Source:MGI Symbol;Acc:MGI:1931527]	chr13:23621755-23622502|-	23.0127	8.68334	1.28475	0.000732	187.295
ENSMUSG00000079555	Haus3	HAUS augmin-like complex, subunit 3 [Source:MGI Symbol;Acc:MGI:2387633]	chr5:34153880-34169527|-	31.9918	13.0389	1.28317	2.1e-31	2344.1
ENSMUSG00000073468	Sft2d1	SFT2 domain containing 1 [Source:MGI Symbol;Acc:MGI:1918689]	chr17:8311102-8396852|+	6.33978	2.55025	1.28276	7.36e-13	317.315
ENSMUSG00000067773	Defb41	defensin beta 41 [Source:MGI Symbol;Acc:MGI:1924923]	chr1:18250980-18265138|-	5.199	1.94516	1.2784	0.00169821	35.0063
ENSMUSG00000003721	Insig2	insulin induced gene 2 [Source:MGI Symbol;Acc:MGI:1920249]	chr1:121304353-121332589|-	0.875766	0.334099	1.25422	0.00100351	39.8233
ENSMUSG00000053536	Cstf2t	cleavage stimulation factor, 3' pre-RNA subunit 2, tau [Source:MGI Symbol;Acc:MGI:1932622]	chr19:31082841-31086590|+	5.4862	2.29341	1.24701	5e-17	265.297
ENSMUSG00000068240	Gm11808	predicted gene 11808 [Source:MGI Symbol;Acc:MGI:3649356]	chr4:3973092-3973595|-	2.59625	0.895305	1.24152	0.00044	125.386
ENSMUSG00000025436	Atp23	ATP23 metallopeptidase and ATP synthase assembly factor homolog [Source:MGI Symbol;Acc:MGI:1916984]	chr10:126868427-126901355|-	0.991004	0.388724	1.23945	0.000277	62.1757
ENSMUSG00000061559	Wdr61	WD repeat domain 61 [Source:MGI Symbol;Acc:MGI:1917493]	chr9:54714735-54734519|-	0.974383	0.380615	1.23181	0.000386	57.3332
ENSMUSG00000006763	Saal1	serum amyloid A-like 1 [Source:MGI Symbol;Acc:MGI:1926185]	chr7:46686108-46710680|-	0.298776	0.114773	1.21672	0.00373244	29.7256
ENSMUSG00000026109	Tmeff2	transmembrane protein with EGF-like and two follistatin-like domains 2 [Source:MGI Symbol;Acc:MGI:1861735]	chr1:50900647-51187270|+	0.952621	0.394009	1.21374	1.13e-05	73.8117
ENSMUSG00000062257	Opcml	opioid binding protein/cell adhesion molecule-like [Source:MGI Symbol;Acc:MGI:97397]	chr9:27790775-28925410|+	0.185378	0.0612039	1.20226	0.0589127	23.679
ENSMUSG00000051379	Flrt3	fibronectin leucine rich transmembrane protein 3 [Source:MGI Symbol;Acc:MGI:1918686]	chr2:140650914-140671469|-	2.122	0.884777	1.20204	6.41e-06	101.865
ENSMUSG00000018102	Hist1h2bc	histone cluster 1, H2bc [Source:MGI Symbol;Acc:MGI:1915274]	chr13:23684199-23692488|+	61.8237	26.7514	1.19524	1.52e-17	706.812
ENSMUSG00000026435	Slc45a3	solute carrier family 45, member 3 [Source:MGI Symbol;Acc:MGI:1922082]	chr1:131962967-131982969|+	126.674	54.5092	1.19477	2.69e-26	9646.55
ENSMUSG00000027508	Pag1	phosphoprotein associated with glycosphingolipid microdomains 1 [Source:MGI Symbol;Acc:MGI:2443160]	chr3:9687479-9833679|-	6.60431	2.86648	1.18914	1.05e-18	1173.67
ENSMUSG00000056427	Slit3	slit homolog 3 (Drosophila) [Source:MGI Symbol;Acc:MGI:1315202]	chr11:35121224-35708507|+	0.985577	0.408455	1.18878	0.000179	73.0662
ENSMUSG00000032757	Bet1	Bet1 golgi vesicular membrane trafficking protein [Source:MGI Symbol;Acc:MGI:1343104]	chr6:4076899-4086972|-	9.08589	3.97008	1.18279	7.66e-21	415.255
ENSMUSG00000037214	Thap1	THAP domain containing, apoptosis associated protein 1 [Source:MGI Symbol;Acc:MGI:1921004]	chr8:26158141-26164151|+	16.5612	7.32791	1.16791	1.03e-28	643.467
ENSMUSG00000037361	Sf3b6	splicing factor 3B, subunit 6 [Source:MGI Symbol;Acc:MGI:1913305]	chr12:4817544-4827659|+	2.26758	0.974912	1.16347	9.19e-06	78.7311
ENSMUSG00000028643	Svbp	small vasohibin binding protein [Source:MGI Symbol;Acc:MGI:1916466]	chr4:119195306-119201298|+	0.402071	0.100209	1.16083	0.0277136	27.09
ENSMUSG00000053624	Gykl1	glycerol kinase-like 1 [Source:MGI Symbol;Acc:MGI:891990]	chr18:52693679-52695668|+	0.422263	0.128873	1.16036	0.0479982	24.5239
ENSMUSG00000026970	Rbms1	RNA binding motif, single stranded interacting protein 1 [Source:MGI Symbol;Acc:MGI:1861774]	chr2:60750193-60963192|-	1.64018	0.631067	1.15898	0.0247898	75.1379
ENSMUSG00000062006	Rpl34	ribosomal protein L34 [Source:MGI Symbol;Acc:MGI:1915686]	chr3:130726831-130730398|-	3.43289	1.50453	1.15768	2.15e-09	260.794
ENSMUSG00000002307	Daxx	Fas death domain-associated protein [Source:MGI Symbol;Acc:MGI:1197015]	chr17:33909414-33915589|+	25.2289	11.3077	1.15711	1.7e-26	864.569
ENSMUSG00000014294	Ndufa2	NADH dehydrogenase (ubiquinone) 1 alpha subcomplex, 2 [Source:MGI Symbol;Acc:MGI:1343103]	chr18:36742332-36744557|-	2.34538	0.956952	1.15483	0.00170945	134.997
ENSMUSG00000039497	Dse	dermatan sulfate epimerase [Source:MGI Symbol;Acc:MGI:2443455]	chr10:34151393-34207715|-	1.4219	0.605012	1.15407	5.35e-07	449.739
ENSMUSG00000026097	Ormdl1	ORM1-like 1 (S. cerevisiae) [Source:MGI Symbol;Acc:MGI:2181669]	chr1:53297095-53310309|+	0.385193	0.134172	1.15229	0.0181205	72.3959
ENSMUSG00000025199	Chuk	conserved helix-loop-helix ubiquitous kinase [Source:MGI Symbol;Acc:MGI:99484]	chr19:44073335-44107480|-	4.09611	1.78328	1.14744	2.41e-06	221.535
ENSMUSG00000090946	Ccdc71l	coiled-coil domain containing 71 like [Source:MGI Symbol;Acc:MGI:1919373]	chr12:32378704-32382943|+	0.849801	0.351211	1.12973	0.00598493	48.7414
ENSMUSG00000020248	Nfyb	nuclear transcription factor-Y beta [Source:MGI Symbol;Acc:MGI:97317]	chr10:82748701-82764144|-	1.55797	0.687795	1.12945	1.37e-06	116.376
ENSMUSG00000016940	Kctd2	potassium channel tetramerisation domain containing 2 [Source:MGI Symbol;Acc:MGI:1917632]	chr11:115420128-115431274|+	0.650123	0.271489	1.12441	0.00301987	80.8562
ENSMUSG00000089876	Tmem102	transmembrane protein 102 [Source:MGI Symbol;Acc:MGI:1921591]	chr11:69803603-69805624|-	0.531451	0.19533	1.12292	0.0105098	42.2149
ENSMUSG00000079641	Rpl39	ribosomal protein L39 [Source:MGI Symbol;Acc:MGI:1914498]	chrX:37082520-37085402|-	2.18807	0.876583	1.12257	0.00248899	803.32
ENSMUSG00000032724	Abtb2	ankyrin repeat and BTB (POZ) domain containing 2 [Source:MGI Symbol;Acc:MGI:2139365]	chr2:103566310-103718423|+	1.48369	0.659389	1.11544	1.08e-05	143.484
ENSMUSG00000031533	Mrps31	mitochondrial ribosomal protein S31 [Source:MGI Symbol;Acc:MGI:1913153]	chr8:22411361-22429665|+	7.49414	3.41958	1.1017	3.41e-10	677.613
ENSMUSG00000092086	Gm6793	predicted gene 6793 [Source:MGI Symbol;Acc:MGI:3643578]	chr8:112013433-112015036|-	72.5151	33.6974	1.10136	2.05e-29	1405.76
ENSMUSG00000086727	4931428L18Rik	RIKEN cDNA 4931428L18 gene [Source:MGI Symbol;Acc:MGI:1918238]	chr1:31135226-31222684|-	29.1403	13.5551	1.09818	1.9e-15	480.078
ENSMUSG00000028322	Exosc3	exosome component 3 [Source:MGI Symbol;Acc:MGI:1913612]	chr4:45316613-45342732|-	40.286	18.9716	1.08208	4.48e-24	578.36
ENSMUSG00000060681	Slc9a6	solute carrier family 9 (sodium/hydrogen exchanger), member 6 [Source:MGI Symbol;Acc:MGI:2443511]	chrX:56609757-56664230|+	0.301522	0.121774	1.08068	0.0290833	24.9818
ENSMUSG00000045775	Slc16a5	solute carrier family 16 (monocarboxylic acid transporters), member 5 [Source:MGI Symbol;Acc:MGI:2443515]	chr11:115462474-115474398|+	0.548037	0.206102	1.07245	0.082642	23.2843
ENSMUSG00000051255	Gm6563	predicted pseudogene 6563 [Source:MGI Symbol;Acc:MGI:3646907]	chr19:23675844-23676712|+	2.63473	1.13609	1.06677	0.0123406	49.1511
ENSMUSG00000022180	Slc7a8	solute carrier family 7 (cationic amino acid transporter, y+ system), member 8 [Source:MGI Symbol;Acc:MGI:1355323]	chr14:54722216-54781886|-	2.28476	1.07089	1.06665	1.52e-09	278.851
ENSMUSG00000033715	Akr1c14	aldo-keto reductase family 1, member C14 [Source:MGI Symbol;Acc:MGI:2145458]	chr13:4049011-4090688|+	0.488677	0.204323	1.06571	0.0277214	21.8286
ENSMUSG00000028132	Tmem56	transmembrane protein 56 [Source:MGI Symbol;Acc:MGI:1923195]	chr3:121201761-121283098|-	0.696482	0.308346	1.06216	0.00772278	65.9402
ENSMUSG00000063320	1190007I07Rik	RIKEN cDNA 1190007I07 gene [Source:MGI Symbol;Acc:MGI:3698433]	chr10:82619851-82623228|-	4.35974	1.99962	1.06108	0.000611	47.4582
ENSMUSG00000019876	Pkib	protein kinase inhibitor beta, cAMP dependent, testis specific [Source:MGI Symbol;Acc:MGI:101937]	chr10:57631981-57741112|+	1.31542	0.598335	1.0565	0.00106904	169.555
ENSMUSG00000031594	Fgl1	fibrinogen-like protein 1 [Source:MGI Symbol;Acc:MGI:102795]	chr8:41191434-41215156|-	0.316992	0.137941	1.05202	0.0200267	24.8915
ENSMUSG00000027822	Slc33a1	solute carrier family 33 (acetyl-CoA transporter), member 1 [Source:MGI Symbol;Acc:MGI:1332247]	chr3:63933507-63964768|-	0.669171	0.303841	1.04842	0.00679172	41.4497
ENSMUSG00000048970	C1galt1c1	C1GALT1-specific chaperone 1 [Source:MGI Symbol;Acc:MGI:1913493]	chrX:38630785-38635087|-	3.22446	1.48678	1.04792	8.84e-05	185.567
ENSMUSG00000000440	Pparg	peroxisome proliferator activated receptor gamma [Source:MGI Symbol;Acc:MGI:97747]	chr6:115360951-115490399|+	20.5452	9.89511	1.04701	3.16e-19	708.379
ENSMUSG00000056515	Rab31	RAB31, member RAS oncogene family [Source:MGI Symbol;Acc:MGI:1914603]	chr17:65651726-65772752|-	2.48833	1.15875	1.04199	0.000286	109.279
ENSMUSG00000069089	Cdk7	cyclin-dependent kinase 7 [Source:MGI Symbol;Acc:MGI:102956]	chr13:100697027-100730942|-	2.33132	1.11445	1.04027	4.14e-10	345.704
ENSMUSG00000025260	Hsd17b10	hydroxysteroid (17-beta) dehydrogenase 10 [Source:MGI Symbol;Acc:MGI:1333871]	chrX:152001845-152004442|+	1.92619	0.86835	1.03959	0.00391013	55.3391
ENSMUSG00000026150	Mff	mitochondrial fission factor [Source:MGI Symbol;Acc:MGI:1922984]	chr1:82724890-82752394|+	26.1498	12.7171	1.03295	1.7e-30	3023.14
ENSMUSG00000014470	Rnf166	ring finger protein 166 [Source:MGI Symbol;Acc:MGI:1915968]	chr8:122466147-122476064|-	7.98838	3.84143	1.03248	1.88e-10	297.505
ENSMUSG00000053164	Gpr21	G protein-coupled receptor 21 [Source:MGI Symbol;Acc:MGI:2441890]	chr2:37516332-37520603|+	0.819734	0.369863	1.03072	0.0145082	32.9651
ENSMUSG00000028563	Tm2d1	TM2 domain containing 1 [Source:MGI Symbol;Acc:MGI:2137022]	chr4:98355370-98383306|-	9.97607	4.74853	1.03012	1.5e-05	200.541
ENSMUSG00000057716	Tmem178b	transmembrane protein 178B [Source:MGI Symbol;Acc:MGI:3647581]	chr6:39873271-40255150|+	1.25181	0.561751	1.02756	0.00801159	398.46
ENSMUSG00000025940	Tmem70	transmembrane protein 70 [Source:MGI Symbol;Acc:MGI:1915068]	chr1:16665207-16678275|+	17.2358	8.38697	1.02732	3.49e-15	437.217
ENSMUSG00000031832	Taf1c	TATA-box binding protein associated factor, RNA polymerase I, C [Source:MGI Symbol;Acc:MGI:109576]	chr8:119597871-119605222|-	0.469572	0.196025	1.02497	0.0638377	22.4039
ENSMUSG00000040722	Scamp5	secretory carrier membrane protein 5 [Source:MGI Symbol;Acc:MGI:1928948]	chr9:57441327-57468060|-	2.98198	1.41814	1.02035	4.57e-05	442.506
ENSMUSG00000030744	Rps3	ribosomal protein S3 [Source:MGI Symbol;Acc:MGI:1350917]	chr7:99477896-99483738|-	0.727614	0.348638	1.01891	0.000127	197.687
ENSMUSG00000061787	Rps17	ribosomal protein S17 [Source:MGI Symbol;Acc:MGI:1309526]	chr7:81342732-81345254|-	1.40402	0.609284	1.01803	0.000479	378.627
ENSMUSG00000073725	Lmbrd1	LMBR1 domain containing 1 [Source:MGI Symbol;Acc:MGI:1915671]	chr1:24678630-24766301|+	3.1397	1.54245	1.01216	2.67e-09	360.734
ENSMUSG00000017561	Crlf3	cytokine receptor-like factor 3 [Source:MGI Symbol;Acc:MGI:1860086]	chr11:80046493-80080991|-	4.39519	2.13063	1.01195	4.17e-07	257.098
ENSMUSG00000095891	Gm10717	predicted gene 10717 [Source:MGI Symbol;Acc:MGI:3642031]	chr9:3025417-3033289|+	1.93659	0.850375	1.003	0.0903806	61.5991
ENSMUSG00000068604	Gm8225	predicted gene 8225 [Source:MGI Symbol;Acc:MGI:3643826]	chr17:26542760-26543715|+	8.8868	4.32634	0.998281	0.000351	88.9956
ENSMUSG00000007836	Hnrnpa0	heterogeneous nuclear ribonucleoprotein A0 [Source:MGI Symbol;Acc:MGI:1924384]	chr13:58125879-58128556|-	18.1584	9.03095	0.995416	8.17e-14	532.847
ENSMUSG00000003227	Edar	ectodysplasin-A receptor [Source:MGI Symbol;Acc:MGI:1343498]	chr10:58600789-58675654|-	0.336824	0.142843	0.995393	0.0369956	52.0295
ENSMUSG00000071551	Akr1c19	aldo-keto reductase family 1, member C19 [Source:MGI Symbol;Acc:MGI:2653678]	chr13:4228700-4252843|+	0.301392	0.129681	0.995075	0.0689122	25.6149
ENSMUSG00000028259	Fhl5	four and a half LIM domains 5 [Source:MGI Symbol;Acc:MGI:1913192]	chr4:25199908-25242876|-	1.04468	0.397296	0.993094	0.0791621	39.5743
ENSMUSG00000097487	Ptges3l	prostaglandin E synthase 3 (cytosolic)-like [Source:MGI Symbol;Acc:MGI:1916146]	chr11:101418812-101425333|-	0.322946	0.12797	0.992494	0.0684162	25.5287
ENSMUSG00000029263	Pigg	phosphatidylinositol glycan anchor biosynthesis, class G [Source:MGI Symbol;Acc:MGI:3576484]	chr5:108312609-108349355|+	0.386462	0.179741	0.983445	0.0109674	89.9962
ENSMUSG00000093847	Gm5039	predicted gene 5039 [Source:MGI Symbol;Acc:MGI:3648085]	chr12:88320122-88324026|-	1.9039	0.888878	0.976032	0.0292234	37.8131
ENSMUSG00000095427	Rps2-ps6	ribosomal protein S2, pseudogene 6 [Source:MGI Symbol;Acc:MGI:3644876]	chr14:76236688-76237353|-	13.6441	6.81932	0.975195	2.59e-05	98.191
ENSMUSG00000021846	Peli2	pellino 2 [Source:MGI Symbol;Acc:MGI:1891445]	chr14:48120869-48260883|+	5.51401	2.52021	0.971458	0.056141	459.742
ENSMUSG00000028329	Xpa	xeroderma pigmentosum, complementation group A [Source:MGI Symbol;Acc:MGI:99135]	chr4:46155347-46196311|-	5.00131	2.44151	0.971054	0.00169362	148.808
ENSMUSG00000056947	Mab21l1	mab-21-like 1 (C. elegans) [Source:MGI Symbol;Acc:MGI:1333773]	chr3:55782510-55785001|+	2.13247	1.03331	0.9599	0.0104826	64.9123
ENSMUSG00000024087	Cyp1b1	cytochrome P450, family 1, subfamily b, polypeptide 1 [Source:MGI Symbol;Acc:MGI:88590]	chr17:79706953-79715041|-	1.10326	0.548141	0.958961	8.02e-06	134.464
ENSMUSG00000034708	Grn	granulin [Source:MGI Symbol;Acc:MGI:95832]	chr11:102430315-102437048|+	3.5131	1.75596	0.958891	2.41e-06	516.764
ENSMUSG00000028980	H6pd	hexose-6-phosphate dehydrogenase (glucose 1-dehydrogenase) [Source:MGI Symbol;Acc:MGI:2140356]	chr4:149979475-150009023|-	0.570042	0.280778	0.958612	0.0019245	78.0086
ENSMUSG00000047674	Pdha2	pyruvate dehydrogenase E1 alpha 2 [Source:MGI Symbol;Acc:MGI:97533]	chr3:141210004-141212355|-	0.80515	0.379271	0.958523	0.0403744	22.0975
ENSMUSG00000091028	Gm10722	predicted gene 10722 [Source:MGI Symbol;Acc:MGI:3642024]	chr9:3000922-3002330|+	9.31306	4.30282	0.955627	0.0960106	48.0384
ENSMUSG00000044533	Rps2	ribosomal protein S2 [Source:MGI Symbol;Acc:MGI:105110]	chr17:24718116-24721929|+	72.587	37.3471	0.952754	1.45e-10	1468
ENSMUSG00000028409	Smu1	smu-1 suppressor of mec-8 and unc-52 homolog (C. elegans) [Source:MGI Symbol;Acc:MGI:1915546]	chr4:40736542-40757923|-	100.256	51.7991	0.952223	2.05e-29	4362.53
ENSMUSG00000020163	Uqcr11	ubiquinol-cytochrome c reductase, complex III subunit XI [Source:MGI Symbol;Acc:MGI:1913844]	chr10:80402997-80406830|-	1.72054	0.787689	0.952125	0.0167825	108.393
ENSMUSG00000047606	Ankrd34c	ankyrin repeat domain 34C [Source:MGI Symbol;Acc:MGI:2685617]	chr9:89725245-89738475|-	1.47952	0.740473	0.950379	0.00174131	88.1126
ENSMUSG00000074748	Atxn7l3b	ataxin 7-like 3B [Source:MGI Symbol;Acc:MGI:1914971]	chr10:112925430-112929001|-	4.10955	2.08446	0.949871	8.55e-05	171.552
ENSMUSG00000036913	Trim67	tripartite motif-containing 67 [Source:MGI Symbol;Acc:MGI:3045323]	chr8:124793092-124834713|+	0.423823	0.195353	0.948458	0.0638377	40.9776
ENSMUSG00000029817	Tra2a	transformer 2 alpha homolog (Drosophila) [Source:MGI Symbol;Acc:MGI:1933972]	chr6:49243924-49264033|-	2.46918	1.25393	0.947011	8.49e-06	207.075
ENSMUSG00000034892	Rps29	ribosomal protein S29 [Source:MGI Symbol;Acc:MGI:107681]	chr12:69157722-69159186|-	4.23763	2.12839	0.944993	0.000375	429.814
ENSMUSG00000033316	Galnt9	UDP-N-acetyl-alpha-D-galactosamine:polypeptide N-acetylgalactosaminyltransferase 9 [Source:MGI Symbol;Acc:MGI:2677965]	chr5:110544355-110621380|+	0.409429	0.181528	0.941642	0.0145082	109.904
ENSMUSG00000052516	Robo2	roundabout guidance receptor 2 [Source:MGI Symbol;Acc:MGI:1890110]	chr16:73892306-74411825|-	0.231914	0.112812	0.934325	0.00746425	72.9129
ENSMUSG00000027377	Mall	mal, T cell differentiation protein-like [Source:MGI Symbol;Acc:MGI:2385152]	chr2:127704386-127729932|-	2.51687	1.23569	0.93398	0.0213396	58.9784
ENSMUSG00000033157	Abhd10	abhydrolase domain containing 10 [Source:MGI Symbol;Acc:MGI:2442422]	chr16:45729725-45742955|-	1.94259	0.970018	0.932947	0.0039299	73.9263
ENSMUSG00000045827	Serpinb9	serine (or cysteine) peptidase inhibitor, clade B, member 9 [Source:MGI Symbol;Acc:MGI:106603]	chr13:33003250-33017957|+	1.01928	0.492051	0.921426	0.0456049	40.7104
ENSMUSG00000026848	Tor1b	torsin family 1, member B [Source:MGI Symbol;Acc:MGI:1353605]	chr2:30952959-30959015|+	0.504723	0.247097	0.913519	0.0369373	39.8387
ENSMUSG00000063412	Gm10131	predicted pseudogene 10131 [Source:MGI Symbol;Acc:MGI:3704308]	chr8:34111002-34111737|-	46.3823	24.4899	0.911773	2e-08	360.337
ENSMUSG00000032908	Sgpp2	sphingosine-1-phosphate phosphotase 2 [Source:MGI Symbol;Acc:MGI:3589109]	chr1:78310345-78420289|+	2.35063	1.11663	0.910277	0.0718159	106.263
ENSMUSG00000003581	Rnf215	ring finger protein 215 [Source:MGI Symbol;Acc:MGI:1918923]	chr11:4135202-4141172|+	0.214195	0.0830136	0.909858	0.0573918	48.6411
ENSMUSG00000022422	Dscc1	DNA replication and sister chromatid cohesion 1 [Source:MGI Symbol;Acc:MGI:1919357]	chr15:55076099-55090491|-	2.10531	1.06764	0.908543	0.00652974	213.528
ENSMUSG00000001082	Mfsd10	major facilitator superfamily domain containing 10 [Source:MGI Symbol;Acc:MGI:1915544]	chr5:34633642-34637212|-	1.12551	0.587531	0.908032	0.00063	149.189
ENSMUSG00000078974	Sec61g	SEC61, gamma subunit [Source:MGI Symbol;Acc:MGI:1202066]	chr11:16500530-16508484|-	12.8471	6.74377	0.907983	2.64e-07	886.206
ENSMUSG00000057417	Dcpp3	demilune cell and parotid protein 3 [Source:MGI Symbol;Acc:MGI:3646420]	chr17:23917458-23919441|+	1.47105	0.644862	0.906265	0.07105	61.4676
ENSMUSG00000037916	Ndufv1	NADH dehydrogenase (ubiquinone) flavoprotein 1 [Source:MGI Symbol;Acc:MGI:107851]	chr19:4007497-4012806|-	0.684691	0.337277	0.905769	0.0202267	170.06
ENSMUSG00000044627	Swi5	SWI5 recombination repair homolog (yeast) [Source:MGI Symbol;Acc:MGI:1920181]	chr2:32278816-32288075|-	14.2395	7.61587	0.902982	2.53e-12	943.59
ENSMUSG00000072934	Trpc5os	transient receptor potential cation channel, subfamily C, member 5, opposite strand [Source:MGI Symbol;Acc:MGI:3641805]	chrX:144456581-144477066|+	2.78863	1.45687	0.898422	0.00108424	138.621
ENSMUSG00000038335	Tsr1	TSR1 20S rRNA accumulation [Source:MGI Symbol;Acc:MGI:2144566]	chr11:74898071-74909342|+	1.19469	0.609334	0.897027	0.00646796	64.7345
ENSMUSG00000030342	Cd9	CD9 antigen [Source:MGI Symbol;Acc:MGI:88348]	chr6:125460266-125494791|-	8.99004	4.78785	0.890459	6.11e-08	420.019
ENSMUSG00000035666	Gtf3c4	general transcription factor IIIC, polypeptide 4 [Source:MGI Symbol;Acc:MGI:2138937]	chr2:28822299-28840360|-	0.720913	0.375168	0.888409	0.00291954	84.8125
ENSMUSG00000042487	Leo1	Leo1, Paf1/RNA polymerase II complex component [Source:MGI Symbol;Acc:MGI:2685031]	chr9:75441524-75466432|+	14.3509	7.75064	0.887885	4.1e-09	1812.99
ENSMUSG00000029759	Pon3	paraoxonase 3 [Source:MGI Symbol;Acc:MGI:106686]	chr6:5220852-5256286|-	0.380554	0.177793	0.887382	0.0840638	24.048
ENSMUSG00000028917	Plekhm2	pleckstrin homology domain containing, family M (with RUN domain) member 2 [Source:MGI Symbol;Acc:MGI:1916832]	chr4:141625734-141664899|-	0.408158	0.209059	0.887119	0.0299489	33.0136
ENSMUSG00000050379	2018-09-06	septin 6 [Source:MGI Symbol;Acc:MGI:1888939]	chrX:36911326-36991794|-	0.442665	0.217338	0.883674	0.083847	44.2913
ENSMUSG00000031990	Jam3	junction adhesion molecule 3 [Source:MGI Symbol;Acc:MGI:1933825]	chr9:27097384-27155421|-	2.70095	1.43714	0.881191	0.000201	159.819
ENSMUSG00000022899	Slc15a2	solute carrier family 15 (H+/peptide transporter), member 2 [Source:MGI Symbol;Acc:MGI:1890457]	chr16:36750178-36784962|-	1.16938	0.62593	0.881067	3.36e-05	237.733
ENSMUSG00000026188	Tmem169	transmembrane protein 169 [Source:MGI Symbol;Acc:MGI:2442781]	chr1:72284369-72303104|+	14.4324	7.7713	0.880377	1.33e-08	626.636
ENSMUSG00000054400	Cklf	chemokine-like factor [Source:MGI Symbol;Acc:MGI:1922708]	chr8:104250861-104264938|+	0.958113	0.505962	0.879612	0.0011264	92.9436
ENSMUSG00000032883	Acsl3	acyl-CoA synthetase long-chain family member 3 [Source:MGI Symbol;Acc:MGI:1921455]	chr1:78657825-78707743|+	54.8329	29.7425	0.87885	2.86e-20	3298.55
ENSMUSG00000026869	Psmd5	proteasome (prosome, macropain) 26S subunit, non-ATPase, 5 [Source:MGI Symbol;Acc:MGI:1914248]	chr2:34849734-34874968|-	11.8892	6.45912	0.87875	1.05e-18	1342.64
ENSMUSG00000033721	Vav3	vav 3 oncogene [Source:MGI Symbol;Acc:MGI:1888518]	chr3:109340653-109685698|+	1.12918	0.584434	0.875641	0.0195977	99.2945
ENSMUSG00000026333	Gin1	gypsy retrotransposon integrase 1 [Source:MGI Symbol;Acc:MGI:2182036]	chr1:97770172-97793709|+	0.71367	0.355848	0.874187	0.0515108	114.663
ENSMUSG00000049657	Zbtb5	zinc finger and BTB domain containing 5 [Source:MGI Symbol;Acc:MGI:1924601]	chr4:44991242-45012412|-	0.463973	0.23784	0.87283	0.0605944	34.0709
ENSMUSG00000028266	Lmo4	LIM domain only 4 [Source:MGI Symbol;Acc:MGI:109360]	chr3:144188530-144205220|-	0.695284	0.348424	0.869063	0.084805	34.4268
ENSMUSG00000035958	Tdp2	tyrosyl-DNA phosphodiesterase 2 [Source:MGI Symbol;Acc:MGI:1860486]	chr13:24831679-24842153|+	8.31468	4.5308	0.86823	4.85e-10	341.379
ENSMUSG00000002379	Ndufa11	NADH dehydrogenase (ubiquinone) 1 alpha subcomplex 11 [Source:MGI Symbol;Acc:MGI:1917125]	chr17:56717762-56724248|+	1.07358	0.568174	0.867832	0.00796108	199.517
ENSMUSG00000039488	Cntn5	contactin 5 [Source:MGI Symbol;Acc:MGI:3042287]	chr9:9660891-10904775|-	0.615839	0.323692	0.867494	0.0257963	37.0631
ENSMUSG00000051056	Gja10	gap junction protein, alpha 10 [Source:MGI Symbol;Acc:MGI:1339969]	chr4:32596960-32602760|-	2.45156	1.28324	0.8639	0.0190259	60.0346
ENSMUSG00000047712	Ust	uronyl-2-sulfotransferase [Source:MGI Symbol;Acc:MGI:2442406]	chr10:8204756-8518825|-	5.6927	3.03288	0.863252	0.00162161	317.877
ENSMUSG00000015474	Ppt2	palmitoyl-protein thioesterase 2 [Source:MGI Symbol;Acc:MGI:1860075]	chr17:34616662-34628510|-	4.30454	2.34256	0.862151	8.53e-07	231.783
ENSMUSG00000022261	Sdc2	syndecan 2 [Source:MGI Symbol;Acc:MGI:1349165]	chr15:32920723-33034730|+	1.42716	0.754648	0.858119	0.0213807	73.3633
ENSMUSG00000026073	Il1r2	interleukin 1 receptor, type II [Source:MGI Symbol;Acc:MGI:96546]	chr1:40074079-40125231|+	0.900889	0.449555	0.856447	0.0530688	79.705
ENSMUSG00000047963	Stbd1	starch binding domain 1 [Source:MGI Symbol;Acc:MGI:1261768]	chr5:92603041-92606579|+	27.3295	14.9674	0.856348	7.09e-10	1368.55
ENSMUSG00000037752	Xkr8	X-linked Kx blood group related 8 [Source:MGI Symbol;Acc:MGI:2685877]	chr4:132724897-132732546|-	0.505936	0.26359	0.855877	0.0227176	71.1571
ENSMUSG00000063063	Ctnna2	catenin (cadherin associated protein), alpha 2 [Source:MGI Symbol;Acc:MGI:88275]	chr6:76881637-77979699|-	0.496984	0.260543	0.855147	0.0119328	70.9446
ENSMUSG00000056820	Tsnax	translin-associated factor X [Source:MGI Symbol;Acc:MGI:1855672]	chr8:125012997-125034192|+	18.6071	10.2602	0.854445	1.57e-21	1394.55
ENSMUSG00000037553	Zdhhc18	zinc finger, DHHC domain containing 18 [Source:MGI Symbol;Acc:MGI:3527792]	chr4:133605299-133650154|-	10.855	5.96775	0.854117	1.13e-12	1560.42
ENSMUSG00000026827	Gpd2	glycerol phosphate dehydrogenase 2, mitochondrial [Source:MGI Symbol;Acc:MGI:99778]	chr2:57237635-57370719|+	10.9165	5.74342	0.85128	0.0148077	683.083
ENSMUSG00000020577	Tspan13	tetraspanin 13 [Source:MGI Symbol;Acc:MGI:1913359]	chr12:36014557-36042500|-	5.47829	2.99186	0.8479	6.41e-05	227.618
ENSMUSG00000004895	Prcc	papillary renal cell carcinoma (translocation-associated) [Source:MGI Symbol;Acc:MGI:2137738]	chr3:87858903-87885608|-	2.97565	1.61134	0.842012	0.00556302	74.1342
ENSMUSG00000039740	Alg2	asparagine-linked glycosylation 2 (alpha-1,3-mannosyltransferase) [Source:MGI Symbol;Acc:MGI:1914731]	chr4:47465067-47474333|-	4.3231	2.36011	0.841184	7.17e-05	374.479
ENSMUSG00000034659	Tmem109	transmembrane protein 109 [Source:MGI Symbol;Acc:MGI:1915789]	chr19:10870660-10882001|-	6.23162	3.46773	0.838596	8.94e-13	568.682
ENSMUSG00000021239	Vsx2	visual system homeobox 2 [Source:MGI Symbol;Acc:MGI:88401]	chr12:84569762-84595457|+	1.38714	0.745474	0.835604	0.0282136	57.7257
ENSMUSG00000038495	Otud7b	OTU domain containing 7B [Source:MGI Symbol;Acc:MGI:2654703]	chr3:96104527-96161129|+	2.49698	1.37115	0.833606	0.00157112	349.759
ENSMUSG00000031668	Eif2ak3	eukaryotic translation initiation factor 2 alpha kinase 3 [Source:MGI Symbol;Acc:MGI:1341830]	chr6:70844515-70905245|+	0.842586	0.456711	0.833285	0.00501587	76.7672
ENSMUSG00000024228	Nudt12	nudix (nucleoside diphosphate linked moiety X)-type motif 12 [Source:MGI Symbol;Acc:MGI:1915243]	chr17:58999618-59013372|-	1.05192	0.55546	0.831033	0.0320892	58.5413
ENSMUSG00000051427	Ccdc157	coiled-coil domain containing 157 [Source:MGI Symbol;Acc:MGI:3041210]	chr11:4141123-4160293|-	0.523455	0.265535	0.829464	0.0963431	47.5454
ENSMUSG00000037375	Hhat	hedgehog acyltransferase [Source:MGI Symbol;Acc:MGI:2444681]	chr1:192496711-192771223|-	4.3132	2.38619	0.828256	0.000354	570.613
ENSMUSG00000042460	C1galt1	core 1 synthase, glycoprotein-N-acetylgalactosamine 3-beta-galactosyltransferase, 1 [Source:MGI Symbol;Acc:MGI:2151071]	chr6:7844842-7875687|+	0.804271	0.422728	0.828152	0.046458	66.6427
ENSMUSG00000028998	Tomm7	translocase of outer mitochondrial membrane 7 homolog (yeast) [Source:MGI Symbol;Acc:MGI:1913419]	chr5:23838944-23844161|-	2.54288	1.33514	0.826612	0.0741459	52.2924
ENSMUSG00000026429	Ube2t	ubiquitin-conjugating enzyme E2T [Source:MGI Symbol;Acc:MGI:1914446]	chr1:134962565-134974162|+	22.6155	12.699	0.826056	1.02e-14	1831.28
ENSMUSG00000001247	Lsr	lipolysis stimulated lipoprotein receptor [Source:MGI Symbol;Acc:MGI:1927471]	chr7:30957770-30973464|-	1.51704	0.823485	0.826031	0.00818107	99.3468
ENSMUSG00000027775	Mfsd1	major facilitator superfamily domain containing 1 [Source:MGI Symbol;Acc:MGI:1914118]	chr3:67582741-67604237|+	14.8706	8.33914	0.823746	5e-12	989.106
ENSMUSG00000008822	Acyp1	acylphosphatase 1, erythrocyte (common) type [Source:MGI Symbol;Acc:MGI:1913454]	chr12:85272398-85288438|-	2.00494	1.06476	0.82359	0.0227579	78.223
ENSMUSG00000006850	Tmco6	transmembrane and coiled-coil domains 6 [Source:MGI Symbol;Acc:MGI:1919233]	chr18:36735068-36742391|+	3.10172	1.67614	0.820127	0.00831316	186.053
ENSMUSG00000015671	Psma2	proteasome (prosome, macropain) subunit, alpha type 2 [Source:MGI Symbol;Acc:MGI:104885]	chr13:14613240-14674236|+	73.0536	41.4316	0.820099	6.53e-13	3385.35
ENSMUSG00000003166	Dgcr2	DiGeorge syndrome critical region gene 2 [Source:MGI Symbol;Acc:MGI:892866]	chr16:17839482-17894145|-	0.836697	0.458618	0.818165	0.00269337	173.75
ENSMUSG00000027070	Lrp2	low density lipoprotein receptor-related protein 2 [Source:MGI Symbol;Acc:MGI:95794]	chr2:69424340-69586065|-	0.712022	0.400112	0.81734	8.52e-06	218.495
ENSMUSG00000026883	Dab2ip	disabled 2 interacting protein [Source:MGI Symbol;Acc:MGI:1916851]	chr2:35558266-35730994|+	0.798032	0.443387	0.816863	0.00402638	91.0491
ENSMUSG00000048875	Hdhd1a	haloacid dehalogenase-like hydrolase domain containing 1A [Source:MGI Symbol;Acc:MGI:1914615]	chr18:50567656-50568699|-	1.99685	1.0694	0.816117	0.0886926	25.5396
ENSMUSG00000054792	Klhl18	kelch-like 18 [Source:MGI Symbol;Acc:MGI:2143315]	chr9:110425926-110476694|-	1.45426	0.816792	0.81305	1.92e-07	1065.84
ENSMUSG00000026315	Serpinb8	serine (or cysteine) peptidase inhibitor, clade B, member 8 [Source:MGI Symbol;Acc:MGI:894657]	chr1:107590006-107610484|+	1.84174	1.029	0.812622	0.00290414	117.757
ENSMUSG00000028367	Txn1	thioredoxin 1 [Source:MGI Symbol;Acc:MGI:98874]	chr4:57943373-57956411|-	30.271	17.1872	0.81151	9.44e-11	516.266
ENSMUSG00000055026	Gabrg3	gamma-aminobutyric acid (GABA) A receptor, subunit gamma 3 [Source:MGI Symbol;Acc:MGI:95624]	chr7:56716465-57387188|-	0.40053	0.220073	0.810491	0.0186732	60.0657
ENSMUSG00000050912	Tmem123	transmembrane protein 123 [Source:MGI Symbol;Acc:MGI:1919179]	chr9:7764041-7794333|+	9.18873	5.16634	0.810214	9.23e-07	569.135
ENSMUSG00000000532	Acvr1b	activin A receptor, type 1B [Source:MGI Symbol;Acc:MGI:1338944]	chr15:101174067-101213679|+	5.26196	2.9813	0.80942	2.19e-10	1102.28
ENSMUSG00000033966	Cdkl4	cyclin-dependent kinase-like 4 [Source:MGI Symbol;Acc:MGI:3587025]	chr17:80523550-80563834|-	2.14993	1.14297	0.80591	0.0728484	83.7994
ENSMUSG00000051455	Meioc	meiosis specific with coiled-coil domain [Source:MGI Symbol;Acc:MGI:2686410]	chr11:102663716-102682237|+	1.07008	0.588653	0.805842	0.0395487	51.1802
ENSMUSG00000034591	Slc41a2	solute carrier family 41, member 2 [Source:MGI Symbol;Acc:MGI:2442940]	chr10:83230848-83337882|-	2.64841	1.50442	0.804678	5.46e-05	799.929
ENSMUSG00000029682	Spam1	sperm adhesion molecule 1 [Source:MGI Symbol;Acc:MGI:109335]	chr6:24791188-24801048|+	4.7006	2.64871	0.803168	0.000142	196.033
ENSMUSG00000069184	Zfp72	zinc finger protein 72 [Source:MGI Symbol;Acc:MGI:3033356]	chr13:74369326-74390836|-	0.286741	0.151716	0.803098	0.0945986	21.7683
ENSMUSG00000029060	Mib2	mindbomb E3 ubiquitin protein ligase 2 [Source:MGI Symbol;Acc:MGI:2679684]	chr4:155654677-155669198|-	0.388023	0.207604	0.802916	0.0480435	55.2406
ENSMUSG00000016427	Ndufa1	NADH dehydrogenase (ubiquinone) 1 alpha subcomplex, 1 [Source:MGI Symbol;Acc:MGI:1929511]	chrX:37187588-37191163|-	9.17477	5.07742	0.801737	0.00465305	96.7018
ENSMUSG00000021576	Pdcd6	programmed cell death 6 [Source:MGI Symbol;Acc:MGI:109283]	chr13:74303509-74317580|-	16.3912	9.35475	0.801249	1.48e-11	554.521
ENSMUSG00000025236	Adpgk	ADP-dependent glucokinase [Source:MGI Symbol;Acc:MGI:1919391]	chr9:59291558-59324052|+	2.13644	1.20875	0.800556	1.39e-05	492.301
ENSMUSG00000053317	Sec61b	Sec61 beta subunit [Source:MGI Symbol;Acc:MGI:1913462]	chr4:47474658-47483242|+	35.2489	20.194	0.800536	5.43e-08	472.26
ENSMUSG00000030772	Dkk3	dickkopf WNT signaling pathway inhibitor 3 [Source:MGI Symbol;Acc:MGI:1354952]	chr7:112116017-112159057|-	0.892811	0.487554	0.798885	0.0299489	84.9879
ENSMUSG00000025503	Taldo1	transaldolase 1 [Source:MGI Symbol;Acc:MGI:1274789]	chr7:141392199-141402968|+	1.13164	0.615691	0.797596	0.0117616	145.032
ENSMUSG00000031131	Vgll1	vestigial like family member 1 [Source:MGI Symbol;Acc:MGI:2655768]	chrX:57088106-57106540|+	2.87755	1.62431	0.797085	0.00302712	96.5389
ENSMUSG00000049659	Aftph	aftiphilin [Source:MGI Symbol;Acc:MGI:1923012]	chr11:20685084-20741589|-	14.4148	8.27316	0.796304	2.31e-13	1297.01
ENSMUSG00000026511	srp.09	signal recognition particle 9 [Source:MGI Symbol;Acc:MGI:1350930]	chr1:182124737-182132407|+	17.5099	10.0852	0.793285	1.36e-14	1140.45
ENSMUSG00000070643	Sox13	SRY (sex determining region Y)-box 13 [Source:MGI Symbol;Acc:MGI:98361]	chr1:133382303-133424377|-	0.815376	0.456719	0.792429	0.0255834	50.2509
ENSMUSG00000029390	Tmed2	transmembrane p24 trafficking protein 2 [Source:MGI Symbol;Acc:MGI:1929269]	chr5:124540695-124550506|+	18.4299	10.443	0.792032	2.54e-05	995.168
ENSMUSG00000069237	Fam8a1	family with sequence similarity 8, member A1 [Source:MGI Symbol;Acc:MGI:2145496]	chr13:46669522-46678056|+	26.8136	15.4231	0.791053	4.19e-15	2961.88
ENSMUSG00000032314	Etfa	electron transferring flavoprotein, alpha polypeptide [Source:MGI Symbol;Acc:MGI:106092]	chr9:55454508-55512243|-	59.6576	34.4985	0.790989	3.01e-13	1574.64
ENSMUSG00000040269	Mrps28	mitochondrial ribosomal protein S28 [Source:MGI Symbol;Acc:MGI:1913480]	chr3:8802146-8923918|-	3.09658	1.72945	0.790629	0.0247747	84.1813
ENSMUSG00000060924	Csmd1	CUB and Sushi multiple domains 1 [Source:MGI Symbol;Acc:MGI:2137383]	chr8:15892537-17535586|-	0.283639	0.15945	0.787448	0.00574976	99.481
ENSMUSG00000046985	Tapt1	transmembrane anterior posterior transformation 1 [Source:MGI Symbol;Acc:MGI:2683537]	chr5:44175154-44226626|-	7.96486	4.56394	0.785488	1.09e-06	1251.29
ENSMUSG00000075419	Dolk	dolichol kinase [Source:MGI Symbol;Acc:MGI:2677836]	chr2:30284231-30286334|-	0.944196	0.51814	0.784187	0.0703168	46.5809
ENSMUSG00000031818	Cox4i1	cytochrome c oxidase subunit IV isoform 1 [Source:MGI Symbol;Acc:MGI:88473]	chr8:120668222-120674207|+	1.46339	0.804106	0.783612	0.00275433	352.487
ENSMUSG00000019843	Fyn	Fyn proto-oncogene [Source:MGI Symbol;Acc:MGI:95602]	chr10:39368855-39565381|+	52.1832	30.2503	0.783536	1.25e-18	2962.67
ENSMUSG00000094985	Topaz1	testis and ovary specific PAZ domain containing 1 [Source:MGI Symbol;Acc:MGI:3779933]	chr9:122747346-122802135|+	2.16462	1.24336	0.781845	0.000149	140.389
ENSMUSG00000094870	Zfp131	zinc finger protein 131 [Source:MGI Symbol;Acc:MGI:1919715]	chr13:119765187-119790805|-	33.5904	19.2102	0.780673	3.41e-06	1181.42
ENSMUSG00000096140	Ankrd66	ankyrin repeat domain 66 [Source:MGI Symbol;Acc:MGI:1925106]	chr17:43534174-43543639|-	2.3877	1.32535	0.779923	0.0666767	41.9933
ENSMUSG00000024378	Stard4	StAR-related lipid transfer (START) domain containing 4 [Source:MGI Symbol;Acc:MGI:2156764]	chr18:33199355-33213862|-	4.64663	2.63146	0.777559	0.0107764	398.44
ENSMUSG00000030518	Fam189a1	family with sequence similarity 189, member A1 [Source:MGI Symbol;Acc:MGI:1917888]	chr7:64756091-65156570|-	3.02849	1.74456	0.775774	0.000838	209.898
ENSMUSG00000031532	Saraf	store-operated calcium entry-associated regulatory factor [Source:MGI Symbol;Acc:MGI:1915137]	chr8:34154575-34170821|+	2.66895	1.5124	0.774729	0.00166156	742.332
ENSMUSG00000028668	Eloa	elongin A [Source:MGI Symbol;Acc:MGI:1351315]	chr4:136003368-136021763|-	8.18711	4.6898	0.772414	0.00122248	443.612
ENSMUSG00000015653	Steap2	six transmembrane epithelial antigen of prostate 2 [Source:MGI Symbol;Acc:MGI:1921301]	chr5:5664829-5694578|-	3.74511	2.19287	0.771738	1.02e-21	1910.02
ENSMUSG00000059005	Hnrnpa3	heterogeneous nuclear ribonucleoprotein A3 [Source:MGI Symbol;Acc:MGI:1917171]	chr2:75659261-75669407|+	98.9664	58.081	0.771394	2e-28	6842.44
ENSMUSG00000053040	Aph1c	aph1 homolog C, gamma secretase subunit [Source:MGI Symbol;Acc:MGI:1915568]	chr9:66814994-66834726|-	0.874798	0.500445	0.770916	0.00623105	247.836
ENSMUSG00000047613	A430005L14Rik	RIKEN cDNA A430005L14 gene [Source:MGI Symbol;Acc:MGI:2140680]	chr4:153957237-153961925|+	3.53383	2.04232	0.768272	0.00618927	104.88
ENSMUSG00000060143	Gm10076	predicted gene 10076 [Source:MGI Symbol;Acc:MGI:3704451]	chr14:105681828-105682211|+	14.2304	8.22787	0.767156	0.0029942	507.579
ENSMUSG00000027202	Slc12a1	solute carrier family 12, member 1 [Source:MGI Symbol;Acc:MGI:103150]	chr2:125152505-125230002|+	0.46372	0.264023	0.766531	0.0266085	38.8199
ENSMUSG00000093674	Rpl41	ribosomal protein L41 [Source:MGI Symbol;Acc:MGI:1915195]	chr10:128548114-128549305|-	13.5992	7.66616	0.765687	0.0101217	1401.28
ENSMUSG00000060461	Dppa5a	developmental pluripotency associated 5A [Source:MGI Symbol;Acc:MGI:101800]	chr9:78367052-78368177|-	10.8119	6.08276	0.764757	0.010669	488.393
ENSMUSG00000040123	Zmym5	zinc finger, MYM-type 5 [Source:MGI Symbol;Acc:MGI:3041170]	chr14:56790585-56811716|-	2.25775	1.29304	0.764568	0.0134427	179.797
ENSMUSG00000014606	Slc25a11	solute carrier family 25 (mitochondrial carrier oxoglutarate carrier), member 11 [Source:MGI Symbol;Acc:MGI:1915113]	chr11:70644196-70647479|-	2.4053	1.38532	0.764241	0.00807479	80.0055
ENSMUSG00000041762	Gpr155	G protein-coupled receptor 155 [Source:MGI Symbol;Acc:MGI:1915776]	chr2:73341506-73386572|-	0.881076	0.512285	0.763756	0.00349269	126.008
ENSMUSG00000020528	Prpsap2	phosphoribosyl pyrophosphate synthetase-associated protein 2 [Source:MGI Symbol;Acc:MGI:2384838]	chr11:61729650-61762088|-	40.5122	23.8139	0.763719	1.96e-07	1143.6
ENSMUSG00000030057	Cnbp	cellular nucleic acid binding protein [Source:MGI Symbol;Acc:MGI:88431]	chr6:87842615-87851106|-	80.0152	46.9538	0.76068	4.14e-10	3962.9
ENSMUSG00000025082	Vwa2	von Willebrand factor A domain containing 2 [Source:MGI Symbol;Acc:MGI:2684334]	chr19:56874249-56912078|+	1.01294	0.580768	0.759335	0.00219586	338.595
ENSMUSG00000038374	Rbm8a	RNA binding motif protein 8a [Source:MGI Symbol;Acc:MGI:1913129]	chr3:96629933-96633791|+	6.32403	3.69834	0.758239	3.99e-07	299.226
ENSMUSG00000029780	Nt5c3	5'-nucleotidase, cytosolic III [Source:MGI Symbol;Acc:MGI:1927186]	chr6:56882400-56923932|-	2.79995	1.61574	0.756206	0.0141217	143.594
ENSMUSG00000037738	Nek5	NIMA (never in mitosis gene a)-related expressed kinase 5 [Source:MGI Symbol;Acc:MGI:2142824]	chr8:22073616-22125053|-	1.78279	1.01723	0.755947	0.0214214	76.4752
ENSMUSG00000027803	Wwtr1	WW domain containing transcription regulator 1 [Source:MGI Symbol;Acc:MGI:1917649]	chr3:57455649-57575910|-	0.422465	0.239851	0.750315	0.0465082	66.9845
ENSMUSG00000022205	Sub1	SUB1 homolog (S. cerevisiae) [Source:MGI Symbol;Acc:MGI:104811]	chr15:11981339-11996983|-	194.28	115.466	0.750181	4.5e-30	8880.69
ENSMUSG00000078427	Sarnp	SAP domain containing ribonucleoprotein [Source:MGI Symbol;Acc:MGI:1913368]	chr10:128817333-128877629|+	6.24282	3.66085	0.750054	0.00317667	202.577
ENSMUSG00000022867	Usp25	ubiquitin specific peptidase 25 [Source:MGI Symbol;Acc:MGI:1353655]	chr16:77014069-77116779|+	0.755974	0.434009	0.746408	0.0633752	36.3729
ENSMUSG00000024598	Fbn2	fibrillin 2 [Source:MGI Symbol;Acc:MGI:95490]	chr18:58008623-58209926|-	1.13132	0.654017	0.745957	0.0107735	117.575
ENSMUSG00000025508	Rplp2	ribosomal protein, large P2 [Source:MGI Symbol;Acc:MGI:1914436]	chr7:141447370-141451585|+	19.2767	11.2963	0.744731	0.000278	473.892
ENSMUSG00000024597	Slc12a2	solute carrier family 12, member 2 [Source:MGI Symbol;Acc:MGI:101924]	chr18:57878678-57946821|+	5.62063	3.18993	0.744258	0.0461264	783.815
ENSMUSG00000005718	Tfap4	transcription factor AP4 [Source:MGI Symbol;Acc:MGI:103239]	chr16:4544661-4559720|-	2.74048	1.59098	0.744009	0.0337562	64.5301
ENSMUSG00000066235	Pomgnt2	protein O-linked mannose beta 1,4-N-acetylglucosaminyltransferase 2 [Source:MGI Symbol;Acc:MGI:2143424]	chr9:121981606-121997110|-	0.740392	0.409213	0.744009	0.0640451	56.7932
ENSMUSG00000036814	Slc6a20a	solute carrier family 6 (neurotransmitter transporter), member 20A [Source:MGI Symbol;Acc:MGI:2143217]	chr9:123634770-123678885|-	1.91158	1.13602	0.741607	4.91e-05	219.453
ENSMUSG00000021255	Esrrb	estrogen related receptor, beta [Source:MGI Symbol;Acc:MGI:1346832]	chr12:86361117-86521628|+	3.29571	1.96244	0.741258	1.14e-06	616.56
ENSMUSG00000035247	Hectd1	HECT domain containing 1 [Source:MGI Symbol;Acc:MGI:2384768]	chr12:51743722-51829536|-	3.26888	1.95315	0.740913	4.04e-16	2663.11
ENSMUSG00000048550	Thnsl1	threonine synthase-like 1 (bacterial) [Source:MGI Symbol;Acc:MGI:2139347]	chr2:21205724-21215009|+	4.22018	2.49162	0.739586	0.000535	267.64
ENSMUSG00000039910	Cited2	Cbp/p300-interacting transactivator, with Glu/Asp-rich carboxy-terminal domain, 2 [Source:MGI Symbol;Acc:MGI:1306784]	chr10:17723218-17725674|+	71.7697	42.9766	0.739056	1.14e-07	2360.72
ENSMUSG00000029319	Coq2	coenzyme Q2 4-hydroxybenzoate polyprenyltransferase [Source:MGI Symbol;Acc:MGI:1919133]	chr5:100654723-100675140|-	3.42143	1.9474	0.737655	0.057821	103.484
ENSMUSG00000036885	Arhgef26	Rho guanine nucleotide exchange factor (GEF) 26 [Source:MGI Symbol;Acc:MGI:1918053]	chr3:62338344-62462221|+	1.17312	0.695959	0.737455	0.000654	137.793
ENSMUSG00000037902	Sirpa	signal-regulatory protein alpha [Source:MGI Symbol;Acc:MGI:108563]	chr2:129592835-129632228|+	1.22774	0.714528	0.737119	0.0426136	74.3401
ENSMUSG00000026986	Hnmt	histamine N-methyltransferase [Source:MGI Symbol;Acc:MGI:2153181]	chr2:24002910-24049394|-	11.2713	6.65383	0.735603	0.00072	214.435
ENSMUSG00000007739	Cct4	chaperonin containing Tcp1, subunit 4 (delta) [Source:MGI Symbol;Acc:MGI:104689]	chr11:22990519-23003780|+	4.25541	2.50583	0.734748	0.000939	393.429
ENSMUSG00000009646	Pla2g12b	phospholipase A2, group XIIB [Source:MGI Symbol;Acc:MGI:1917086]	chr10:59403660-59421976|+	1.00343	0.546603	0.734519	0.0886926	41.4757
ENSMUSG00000032370	Lactb	lactamase, beta [Source:MGI Symbol;Acc:MGI:1933395]	chr9:66955388-66975484|-	13.0611	7.78088	0.734361	2.21e-05	326.355
ENSMUSG00000035212	Leprot	leptin receptor overlapping transcript [Source:MGI Symbol;Acc:MGI:2687005]	chr4:101647718-101659364|+	2.51697	1.46354	0.734155	0.0019245	907.537
ENSMUSG00000038214	Bend3	BEN domain containing 3 [Source:MGI Symbol;Acc:MGI:2677212]	chr10:43478831-43515396|+	2.78693	1.66424	0.733144	0.000427	218.474
ENSMUSG00000028360	Slc44a5	solute carrier family 44, member 5 [Source:MGI Symbol;Acc:MGI:3035141]	chr3:153973436-154271722|+	1.69656	0.988734	0.732738	0.0204747	199.804
ENSMUSG00000039781	Cep131	centrosomal protein 131 [Source:MGI Symbol;Acc:MGI:107440]	chr11:120064430-120086827|-	0.470279	0.257001	0.730048	0.0999185	78.1904
ENSMUSG00000030990	Pgap2	post-GPI attachment to proteins 2 [Source:MGI Symbol;Acc:MGI:2385286]	chr7:102210208-102238567|+	1.87935	1.1199	0.728067	0.000505	132.293
ENSMUSG00000096188	Cmtm4	CKLF-like MARVEL transmembrane domain containing 4 [Source:MGI Symbol;Acc:MGI:2142888]	chr8:104348191-104395807|-	0.586856	0.333713	0.726744	0.0636881	182.138
ENSMUSG00000042498	D330045A20Rik	RIKEN cDNA D330045A20 gene [Source:MGI Symbol;Acc:MGI:2147848]	chrX:139480367-139554582|+	1.27822	0.742122	0.726069	0.0563494	95.1685
ENSMUSG00000069769	Msi2	musashi RNA-binding protein 2 [Source:MGI Symbol;Acc:MGI:1923876]	chr11:88339382-88718513|-	7.59453	4.55375	0.726066	4.23e-05	939.553
ENSMUSG00000040321	Zfp770	zinc finger protein 770 [Source:MGI Symbol;Acc:MGI:2445100]	chr2:114193461-114201469|-	6.33257	3.804	0.726043	1.44e-06	493.251
ENSMUSG00000051650	B3gnt2	UDP-GlcNAc:betaGal beta-1,3-N-acetylglucosaminyltransferase 2 [Source:MGI Symbol;Acc:MGI:1889505]	chr11:22834747-22860961|-	1.17369	0.68983	0.725755	0.0219704	65.1215
ENSMUSG00000044894	Uqcrq	ubiquinol-cytochrome c reductase, complex III subunit VII [Source:MGI Symbol;Acc:MGI:107807]	chr11:53427922-53430831|-	0.551091	0.308381	0.723402	0.0478505	189.338
ENSMUSG00000019894	Slc6a15	solute carrier family 6 (neurotransmitter transporter), member 15 [Source:MGI Symbol;Acc:MGI:2143484]	chr10:103367783-103419377|+	7.82625	4.72234	0.723343	5.49e-07	879.8
ENSMUSG00000025876	Unc5a	unc-5 netrin receptor A [Source:MGI Symbol;Acc:MGI:894682]	chr13:54949411-55006018|+	3.12811	1.8923	0.721401	1.05e-08	820.533
ENSMUSG00000022848	Dirc2	disrupted in renal carcinoma 2 (human) [Source:MGI Symbol;Acc:MGI:2387188]	chr16:35694062-35769356|-	1.45821	0.870676	0.719754	0.0364037	79.2016
ENSMUSG00000009291	Pttg1ip	pituitary tumor-transforming 1 interacting protein [Source:MGI Symbol;Acc:MGI:2652132]	chr10:77581720-77598732|+	4.75863	2.85194	0.719672	0.000627	828.408
ENSMUSG00000051185	Fam174a	family with sequence similarity 174, member A [Source:MGI Symbol;Acc:MGI:1914948]	chr1:95313623-95335284|+	0.541888	0.309705	0.719276	0.0993769	52.307
ENSMUSG00000038717	Atp5l	ATP synthase, H+ transporting, mitochondrial F0 complex, subunit G [Source:MGI Symbol;Acc:MGI:1351597]	chr9:44912557-44920742|-	0.939185	0.55434	0.718929	0.00501314	383.535
ENSMUSG00000025785	Exosc7	exosome component 7 [Source:MGI Symbol;Acc:MGI:1913696]	chr9:123113215-123136129|+	2.42761	1.45657	0.718153	0.00337946	202.968
ENSMUSG00000006019	Dhx34	DEAH (Asp-Glu-Ala-His) box polypeptide 34 [Source:MGI Symbol;Acc:MGI:1918973]	chr7:16197147-16222037|-	0.598414	0.34902	0.717656	0.0208517	78.4086
ENSMUSG00000044408	Sptssa	serine palmitoyltransferase, small subunit A [Source:MGI Symbol;Acc:MGI:1913399]	chr12:54645392-54656573|-	7.57549	4.49297	0.717135	0.0118803	110.387
ENSMUSG00000023994	Nfya	nuclear transcription factor-Y alpha [Source:MGI Symbol;Acc:MGI:97316]	chr17:48386885-48409906|-	43.6952	26.363	0.715397	3.5e-06	8251.29
ENSMUSG00000025130	P4hb	prolyl 4-hydroxylase, beta polypeptide [Source:MGI Symbol;Acc:MGI:97464]	chr11:120560298-120573253|-	14.6106	8.71007	0.714738	0.000372	1897.88
ENSMUSG00000067365	Tmem128	transmembrane protein 128 [Source:MGI Symbol;Acc:MGI:1913559]	chr5:38260185-38269634|+	3.29938	2.00614	0.714732	7.24e-05	232.618
ENSMUSG00000006273	Atp6v1b2	ATPase, H+ transporting, lysosomal V1 subunit B2 [Source:MGI Symbol;Acc:MGI:109618]	chr8:69088646-69113711|+	29.3395	17.7226	0.714436	9.37e-07	1838.19
ENSMUSG00000031446	Cul4a	cullin 4A [Source:MGI Symbol;Acc:MGI:1914487]	chr8:13105621-13147940|+	3.86443	2.30822	0.713758	0.00163321	617.874
ENSMUSG00000021133	Susd6	sushi domain containing 6 [Source:MGI Symbol;Acc:MGI:2444661]	chr12:80790510-80880835|+	0.410814	0.234051	0.71208	0.00516796	355.219
ENSMUSG00000029392	Rilpl1	Rab interacting lysosomal protein-like 1 [Source:MGI Symbol;Acc:MGI:1922945]	chr5:124493080-124531391|-	0.93111	0.539761	0.711824	0.0977814	31.2809
ENSMUSG00000033569	Adgrb3	adhesion G protein-coupled receptor B3 [Source:MGI Symbol;Acc:MGI:2441837]	chr1:25067476-25829707|-	1.17337	0.701101	0.711048	0.00420648	380.998
ENSMUSG00000058385	Hist1h2bg	histone cluster 1, H2bg [Source:MGI Symbol;Acc:MGI:2448386]	chr13:23571408-23571884|+	21.5544	12.953	0.710848	0.00108465	154.264
ENSMUSG00000002910	Arrdc2	arrestin domain containing 2 [Source:MGI Symbol;Acc:MGI:1918057]	chr8:70835129-70839720|-	3.2693	1.96452	0.709143	0.00146563	382.131
ENSMUSG00000032449	Slc25a36	solute carrier family 25, member 36 [Source:MGI Symbol;Acc:MGI:1924909]	chr9:97074961-97111157|-	1.00789	0.606596	0.707972	0.00557439	153.736
ENSMUSG00000001891	Ugp2	UDP-glucose pyrophosphorylase 2 [Source:MGI Symbol;Acc:MGI:2183447]	chr11:21321138-21371201|-	5.78711	3.4672	0.70732	0.00876368	209.112
ENSMUSG00000014030	Pax5	paired box 5 [Source:MGI Symbol;Acc:MGI:97489]	chr4:44524757-44710487|-	5.18333	3.17235	0.707213	3.23e-07	596.26
ENSMUSG00000037410	Tbc1d2b	TBC1 domain family, member 2B [Source:MGI Symbol;Acc:MGI:1914266]	chr9:90202027-90270804|-	3.45953	2.11615	0.705834	6.84e-10	437.328
ENSMUSG00000027018	Hat1	histone aminotransferase 1 [Source:MGI Symbol;Acc:MGI:96013]	chr2:71388958-71441622|+	23.8153	14.5603	0.704508	1.15e-11	991.801
ENSMUSG00000059327	Eda	ectodysplasin-A [Source:MGI Symbol;Acc:MGI:1195272]	chrX:99975606-100400762|+	1.17836	0.710707	0.703928	0.00499973	108.833
ENSMUSG00000038323	1700066M21Rik	RIKEN cDNA 1700066M21 gene [Source:MGI Symbol;Acc:MGI:1920717]	chr1:57377620-57385423|+	10.5074	6.37335	0.702859	0.000208	553.301
ENSMUSG00000039883	Lrrc17	leucine rich repeat containing 17 [Source:MGI Symbol;Acc:MGI:1921761]	chr5:21543559-21575904|+	41.7107	25.5521	0.702141	2.12e-10	3519.86
ENSMUSG00000038485	Socs7	suppressor of cytokine signaling 7 [Source:MGI Symbol;Acc:MGI:2651588]	chr11:97362551-97398542|+	65.462	40.2851	0.701284	3.45e-08	5845.42
ENSMUSG00000042607	Asb4	ankyrin repeat and SOCS box-containing 4 [Source:MGI Symbol;Acc:MGI:1929751]	chr6:5383386-5433022|+	8.68672	5.26769	0.701189	0.000218	361.498
ENSMUSG00000037921	Ddx60	DEAD (Asp-Glu-Ala-Asp) box polypeptide 60 [Source:MGI Symbol;Acc:MGI:2384570]	chr8:61928087-62038244|+	2.39579	1.43391	0.701176	0.0229989	248.425
ENSMUSG00000073640	Rpl27-ps3	ribosomal protein L27, pseudogene 3 [Source:MGI Symbol;Acc:MGI:3646174]	chr18:6332590-6333064|+	3.30599	1.96053	0.701075	0.0734068	86.7174
ENSMUSG00000026893	Gca	grancalcin [Source:MGI Symbol;Acc:MGI:1918521]	chr2:62664285-62694109|+	7.94239	4.80646	0.701019	0.00909595	299.12
ENSMUSG00000037344	Slc12a9	solute carrier family 12 (potassium/chloride transporters), member 9 [Source:MGI Symbol;Acc:MGI:1933532]	chr5:137314558-137333597|-	4.5415	2.79421	0.700684	2.51e-10	565.893
ENSMUSG00000032412	Atp1b3	ATPase, Na+/K+ transporting, beta 3 polypeptide [Source:MGI Symbol;Acc:MGI:107788]	chr9:96332655-96364442|-	29.2229	17.897	0.700181	3.36e-10	1985.67
ENSMUSG00000027107	Chrna1	cholinergic receptor, nicotinic, alpha polypeptide 1 (muscle) [Source:MGI Symbol;Acc:MGI:87885]	chr2:73563215-73580338|-	0.947575	0.56023	0.698953	0.0811726	52.6073
ENSMUSG00000048696	Mex3d	mex3 RNA binding family member D [Source:MGI Symbol;Acc:MGI:2681847]	chr10:80380355-80387659|-	2.75428	1.67078	0.698572	0.0102564	98.7813
ENSMUSG00000020627	Klhl29	kelch-like 29 [Source:MGI Symbol;Acc:MGI:2683857]	chr12:5077472-5375682|-	0.497278	0.295995	0.698062	0.0579103	77.3069
ENSMUSG00000021171	Esyt2	extended synaptotagmin-like protein 2 [Source:MGI Symbol;Acc:MGI:1261845]	chr12:116281196-116391050|+	9.97031	6.1191	0.697232	5.45e-10	3169.98
ENSMUSG00000022964	Tmem50b	transmembrane protein 50B [Source:MGI Symbol;Acc:MGI:1925225]	chr16:91574503-91597800|-	6.03484	3.69032	0.696894	0.00044	238.436
ENSMUSG00000026705	Klhl20	kelch-like 20 [Source:MGI Symbol;Acc:MGI:2444855]	chr1:161088375-161131511|-	1.16519	0.712792	0.696821	0.000475	200.843
ENSMUSG00000070520	Nsmce3	NSE3 homolog, SMC5-SMC6 complex component [Source:MGI Symbol;Acc:MGI:1913897]	chr7:64867052-64872997|-	10.6196	6.55125	0.696685	5.7e-12	750.015
ENSMUSG00000037072	Selenof	selenoprotein F [Source:MGI Symbol;Acc:MGI:1927947]	chr3:144570304-144597680|+	15.2845	9.41827	0.696297	2.79e-11	1242.87
ENSMUSG00000001999	Blvra	biliverdin reductase A [Source:MGI Symbol;Acc:MGI:88170]	chr2:127070665-127097084|+	1.9391	1.16551	0.696215	0.00191081	234.701
ENSMUSG00000022498	Txndc11	thioredoxin domain containing 11 [Source:MGI Symbol;Acc:MGI:1923620]	chr16:11074911-11134650|-	4.14152	2.52665	0.695697	2.22e-05	888.323
ENSMUSG00000038291	Snx25	sorting nexin 25 [Source:MGI Symbol;Acc:MGI:2142610]	chr8:46033261-46152159|-	1.12813	0.668747	0.695531	0.0323576	194.507
ENSMUSG00000021733	Slc4a7	solute carrier family 4, sodium bicarbonate cotransporter, member 7 [Source:MGI Symbol;Acc:MGI:2443878]	chr14:14703025-14799943|+	5.319	3.25375	0.693299	5.05e-05	922.82
ENSMUSG00000027778	Ift80	intraflagellar transport 80 [Source:MGI Symbol;Acc:MGI:1915509]	chr3:68892499-69004570|-	4.72057	2.89988	0.692527	2.31e-06	751.237
ENSMUSG00000038242	Aox4	aldehyde oxidase 4 [Source:MGI Symbol;Acc:MGI:1919122]	chr1:58210397-58268597|+	0.827719	0.49787	0.69186	0.0606322	82.7571
ENSMUSG00000024424	Ttc39c	tetratricopeptide repeat domain 39C [Source:MGI Symbol;Acc:MGI:1919997]	chr18:12599926-12737050|+	1.70596	1.04266	0.691167	0.00185102	210.331
ENSMUSG00000028790	Khdrbs1	KH domain containing, RNA binding, signal transduction associated 1 [Source:MGI Symbol;Acc:MGI:893579]	chr4:129703164-129742303|-	6.06081	3.72873	0.689515	0.00012	445.235
ENSMUSG00000030869	Ndufab1	NADH dehydrogenase (ubiquinone) 1, alpha/beta subcomplex, 1 [Source:MGI Symbol;Acc:MGI:1917566]	chr7:122085403-122101886|-	3.86776	2.38359	0.689291	7.07e-06	334.766
ENSMUSG00000039067	Psmd7	proteasome (prosome, macropain) 26S subunit, non-ATPase, 7 [Source:MGI Symbol;Acc:MGI:1351511]	chr8:107580381-107588464|-	10.7728	6.60252	0.688212	0.000728	455.196
ENSMUSG00000024805	Pcgf5	polycomb group ring finger 5 [Source:MGI Symbol;Acc:MGI:1923505]	chr19:36379067-36456192|+	2.61255	1.58769	0.687886	0.0345893	72.3766
ENSMUSG00000074227	Spint2	serine protease inhibitor, Kunitz type 2 [Source:MGI Symbol;Acc:MGI:1338031]	chr7:29256323-29281912|-	2.51942	1.54177	0.687619	0.0034261	166.276
ENSMUSG00000060098	Prmt7	protein arginine N-methyltransferase 7 [Source:MGI Symbol;Acc:MGI:2384879]	chr8:106210936-106252794|+	0.677849	0.404383	0.685148	0.0456727	211.907
ENSMUSG00000028443	Nudt2	nudix (nucleoside diphosphate linked moiety X)-type motif 2 [Source:MGI Symbol;Acc:MGI:1913651]	chr4:41465151-41480926|+	3.55644	2.14294	0.685139	0.0367024	65.3873
ENSMUSG00000089824	Rbm12	RNA binding motif protein 12 [Source:MGI Symbol;Acc:MGI:1922960]	chr2:156091958-156111978|-	1.56594	0.959478	0.685043	0.00491696	155.278
ENSMUSG00000074738	Fndc10	fibronectin type III domain containing 10 [Source:MGI Symbol;Acc:MGI:2444790]	chr4:155694342-155696481|+	1.28668	0.760886	0.684786	0.07105	57.3959
ENSMUSG00000024811	Tnks2	tankyrase, TRF1-interacting ankyrin-related ADP-ribose polymerase 2 [Source:MGI Symbol;Acc:MGI:1921743]	chr19:36834232-36893477|+	7.60056	4.65294	0.68384	0.000291	1187.99
ENSMUSG00000049532	Sall2	sal-like 2 (Drosophila) [Source:MGI Symbol;Acc:MGI:1354373]	chr14:52311172-52328762|-	3.9496	2.44709	0.683799	0.00134893	264.635
ENSMUSG00000028017	Egf	epidermal growth factor [Source:MGI Symbol;Acc:MGI:95290]	chr3:129677565-129755316|-	1.94504	1.20625	0.683581	1.88e-06	328.154
ENSMUSG00000025421	Hdhd2	haloacid dehalogenase-like hydrolase domain containing 2 [Source:MGI Symbol;Acc:MGI:1924237]	chr18:76930126-76972902|+	1.63371	1.00337	0.683457	0.0185315	96.3017
ENSMUSG00000001627	Ifrd1	interferon-related developmental regulator 1 [Source:MGI Symbol;Acc:MGI:1316717]	chr12:40201567-40248504|-	16.4639	10.21	0.682301	5.14e-10	1340.84
ENSMUSG00000028381	Ugcg	UDP-glucose ceramide glucosyltransferase [Source:MGI Symbol;Acc:MGI:1332243]	chr4:59189257-59222833|+	16.3008	9.86893	0.679836	0.022682	1141.59
ENSMUSG00000032358	Fam83b	family with sequence similarity 83, member B [Source:MGI Symbol;Acc:MGI:2685362]	chr9:76490054-76567116|-	1.48505	0.919432	0.678545	0.0170596	76.0972
ENSMUSG00000053286	Trmt1l	tRNA methyltransferase 1 like [Source:MGI Symbol;Acc:MGI:1916185]	chr1:151428542-151458161|+	2.51409	1.56232	0.677781	5.37e-05	358.786
ENSMUSG00000073481	2018-03-02	mitochondrial amidoxime reducing component 2 [Source:MGI Symbol;Acc:MGI:1914497]	chr1:184813068-184846451|-	9.44995	5.90143	0.676593	1.08e-11	754.893
ENSMUSG00000002728	Naa20	N(alpha)-acetyltransferase 20, NatB catalytic subunit [Source:MGI Symbol;Acc:MGI:1915127]	chr2:145902099-145916425|+	4.28399	2.63557	0.67525	0.000637	290.055
ENSMUSG00000036306	Lzts1	leucine zipper, putative tumor suppressor 1 [Source:MGI Symbol;Acc:MGI:2684762]	chr8:69132669-69184225|-	8.11052	5.04259	0.674942	1.16e-06	783.398
ENSMUSG00000026289	Atg16l1	autophagy related 16-like 1 (S. cerevisiae) [Source:MGI Symbol;Acc:MGI:1924290]	chr1:87755870-87792428|+	2.20753	1.36519	0.674383	0.000373	900.902
ENSMUSG00000045690	Wdr89	WD repeat domain 89 [Source:MGI Symbol;Acc:MGI:1919588]	chr12:75630596-75669537|-	3.96102	2.45428	0.674322	0.00313843	149.046
ENSMUSG00000049624	Slc17a5	solute carrier family 17 (anion/sugar transporter), member 5 [Source:MGI Symbol;Acc:MGI:1924105]	chr9:78536488-78588041|-	1.89569	1.15767	0.673538	0.0359171	91.7514
ENSMUSG00000054753	AU018091	expressed sequence AU018091 [Source:MGI Symbol;Acc:MGI:2142124]	chr7:3154658-3169203|-	4.99551	3.10423	0.673196	0.000105	367.786
ENSMUSG00000018166	Erbb3	erb-b2 receptor tyrosine kinase 3 [Source:MGI Symbol;Acc:MGI:95411]	chr10:128567523-128589652|-	0.964536	0.588489	0.673082	0.0558094	62.4638
ENSMUSG00000052395	Rft1	RFT1 homolog [Source:MGI Symbol;Acc:MGI:3607791]	chr14:30654360-30691317|+	2.48654	1.54453	0.672863	0.0016322	165.963
ENSMUSG00000044164	Rnf182	ring finger protein 182 [Source:MGI Symbol;Acc:MGI:3045355]	chr13:43615710-43670945|+	4.59844	2.81222	0.672711	0.0291149	216.029
ENSMUSG00000042644	Itpr3	inositol 1,4,5-triphosphate receptor 3 [Source:MGI Symbol;Acc:MGI:96624]	chr17:27057304-27122223|+	0.287866	0.174381	0.671418	0.0990585	42.3671
ENSMUSG00000010760	Phlda2	pleckstrin homology like domain, family A, member 2 [Source:MGI Symbol;Acc:MGI:1202307]	chr7:143501545-143503150|-	6.66373	4.14236	0.670139	0.00516796	105.707
ENSMUSG00000029166	Mapre3	microtubule-associated protein, RP/EB family, member 3 [Source:MGI Symbol;Acc:MGI:2140967]	chr5:30814641-30866106|+	1.4473	0.889937	0.669888	0.0202383	85.7445
ENSMUSG00000060904	Arl1	ADP-ribosylation factor-like 1 [Source:MGI Symbol;Acc:MGI:99436]	chr10:88730858-88744094|+	40.4546	25.2695	0.669177	3.09e-06	1204.21
ENSMUSG00000045503	Sys1	SYS1 Golgi-localized integral membrane protein homolog (S. cerevisiae) [Source:MGI Symbol;Acc:MGI:1913710]	chr2:164456964-164479638|+	0.341547	0.205243	0.66742	0.08813	61.0717
ENSMUSG00000033669	Zfp7	zinc finger protein 7 [Source:MGI Symbol;Acc:MGI:99208]	chr15:76879259-76892392|+	2.43423	1.5041	0.667125	0.0425037	93.0139
ENSMUSG00000044763	Trmt10c	tRNA methyltransferase 10C [Source:MGI Symbol;Acc:MGI:1196261]	chr16:56032609-56037819|-	4.98926	3.07458	0.666304	0.00773778	331.675
ENSMUSG00000039001	Rps21	ribosomal protein S21 [Source:MGI Symbol;Acc:MGI:1913731]	chr2:180257377-180258445|+	4.87377	3.01924	0.666286	0.0205997	178.377
ENSMUSG00000025010	Ccnj	cyclin J [Source:MGI Symbol;Acc:MGI:2443297]	chr19:40831279-40848572|+	9.50752	5.9588	0.666001	0.000306	540.637
ENSMUSG00000078348	Sf3b5	splicing factor 3b, subunit 5 [Source:MGI Symbol;Acc:MGI:1913375]	chr10:13005343-13009183|+	2.32676	1.43943	0.663913	0.00148897	330.308
ENSMUSG00000063172	Hspb11	heat shock protein family B (small), member 11 [Source:MGI Symbol;Acc:MGI:1920188]	chr4:107253593-107279938|+	1.22437	0.745294	0.663339	0.0993793	67.5868
ENSMUSG00000070336	Fbxo47	F-box protein 47 [Source:MGI Symbol;Acc:MGI:1920223]	chr11:97853826-97884154|-	4.92696	3.0997	0.661826	0.00016	193.244
ENSMUSG00000035778	Ggta1	glycoprotein galactosyltransferase alpha 1, 3 [Source:MGI Symbol;Acc:MGI:95704]	chr2:35400179-35463231|-	29.1288	18.3036	0.661508	6.45e-08	3143.79
ENSMUSG00000068113	Gm4907	predicted gene 4907 [Source:MGI Symbol;Acc:MGI:3648288]	chrX:23882553-23907607|+	11.5167	7.14219	0.661341	0.0182976	345.79
ENSMUSG00000020723	Cacng4	calcium channel, voltage-dependent, gamma subunit 4 [Source:MGI Symbol;Acc:MGI:1859167]	chr11:107732357-107794557|-	2.85948	1.77183	0.661105	0.00874923	247.797
ENSMUSG00000041697	Cox6a1	cytochrome c oxidase subunit VIa polypeptide 1 [Source:MGI Symbol;Acc:MGI:103099]	chr5:115345642-115348981|-	27.992	17.2102	0.661065	0.00943669	741.88
ENSMUSG00000038115	Ano2	anoctamin 2 [Source:MGI Symbol;Acc:MGI:2387214]	chr6:125690419-126040126|+	1.3091	0.81106	0.659923	0.0504478	119.072
ENSMUSG00000063856	Gpx1	glutathione peroxidase 1 [Source:MGI Symbol;Acc:MGI:104887]	chr9:108338903-108340343|+	6.70156	4.18029	0.659864	0.0347557	147.521
ENSMUSG00000026707	Nsun6	NOL1/NOP2/Sun domain family member 6 [Source:MGI Symbol;Acc:MGI:1921705]	chr2:14995131-15055069|-	0.881216	0.542991	0.659259	0.0195977	94.4638
ENSMUSG00000028614	Ndc1	NDC1 transmembrane nucleoporin [Source:MGI Symbol;Acc:MGI:1920037]	chr4:107367784-107416346|+	5.22972	3.28111	0.659224	0.00013	736.686
ENSMUSG00000020895	Tmem107	transmembrane protein 107 [Source:MGI Symbol;Acc:MGI:1914160]	chr11:69070806-69073293|+	11.2129	7.0268	0.659184	0.00266132	211.103
ENSMUSG00000068966	Zbtb34	zinc finger and BTB domain containing 34 [Source:MGI Symbol;Acc:MGI:2685195]	chr2:33406108-33431324|-	17.7156	11.2464	0.657599	7.15e-06	1661.2
ENSMUSG00000022757	Tfg	Trk-fused gene [Source:MGI Symbol;Acc:MGI:1338041]	chr16:56690332-56717450|-	23.3534	14.7616	0.657365	8.09e-09	852.255
ENSMUSG00000022286	Grhl2	grainyhead-like 2 (Drosophila) [Source:MGI Symbol;Acc:MGI:2182543]	chr15:37233036-37363569|+	2.4612	1.55379	0.65562	4.33e-05	176.054
ENSMUSG00000036208	Nepro	nucleolus and neural progenitor protein [Source:MGI Symbol;Acc:MGI:2384836]	chr16:44724301-44737284|+	0.927986	0.566315	0.655572	0.0811105	75.4173
ENSMUSG00000029176	Anapc4	anaphase promoting complex subunit 4 [Source:MGI Symbol;Acc:MGI:1098673]	chr5:52834012-52867797|+	14.9852	9.43777	0.654751	6.58e-07	1648.03
ENSMUSG00000047227	Gm527	predicted gene 527 [Source:MGI Symbol;Acc:MGI:2685373]	chr12:64917906-64924592|+	59.6197	37.8092	0.654294	2.24e-05	1047.56
ENSMUSG00000024154	Gtf2a1l	general transcription factor IIA, 1-like [Source:MGI Symbol;Acc:MGI:1919078]	chr17:88668660-88715152|+	4.00864	2.46524	0.654041	0.0433416	337.533
ENSMUSG00000027357	Crls1	cardiolipin synthase 1 [Source:MGI Symbol;Acc:MGI:1913836]	chr2:132846666-132866785|+	6.59296	4.04112	0.653973	0.0545177	151.46
ENSMUSG00000046667	Rbm12b1	RNA binding motif protein 12 B1 [Source:MGI Symbol;Acc:MGI:1919647]	chr4:12140264-12146731|+	19.4134	12.3663	0.649693	1.87e-09	817.461
ENSMUSG00000031347	Cetn2	centrin 2 [Source:MGI Symbol;Acc:MGI:1347085]	chrX:72913532-72918411|-	6.917	4.34603	0.648987	0.000376	354.922
ENSMUSG00000060802	B2m	beta-2 microglobulin [Source:MGI Symbol;Acc:MGI:88127]	chr2:122147686-122153083|+	9.18309	5.75235	0.648066	0.00881375	251.489
ENSMUSG00000023915	Tnfrsf21	tumor necrosis factor receptor superfamily, member 21 [Source:MGI Symbol;Acc:MGI:2151075]	chr17:43016555-43089188|+	9.70195	6.05966	0.646477	0.0214553	549.431
ENSMUSG00000061393	Acvr2b	activin receptor IIB [Source:MGI Symbol;Acc:MGI:87912]	chr9:119402118-119434995|+	2.60547	1.66104	0.646463	0.000267	194.719
ENSMUSG00000068749	Psma5	proteasome (prosome, macropain) subunit, alpha type 5 [Source:MGI Symbol;Acc:MGI:1347009]	chr3:108256926-108279974|+	27.6832	17.639	0.646386	1.96e-07	754.36
ENSMUSG00000020954	Strn3	striatin, calmodulin binding protein 3 [Source:MGI Symbol;Acc:MGI:2151064]	chr12:51609632-51691897|-	2.48611	1.55277	0.646283	0.0245064	225.32
ENSMUSG00000021610	Clptm1l	CLPTM1-like [Source:MGI Symbol;Acc:MGI:2442892]	chr13:73604006-73620605|+	4.37761	2.74741	0.646215	0.00309199	373.873
ENSMUSG00000027787	Nmd3	NMD3 ribosome export adaptor [Source:MGI Symbol;Acc:MGI:2140103]	chr3:69721985-69756373|+	12.8162	8.15473	0.644929	1.67e-08	1880.69
ENSMUSG00000022340	Sybu	syntabulin (syntaxin-interacting) [Source:MGI Symbol;Acc:MGI:2442392]	chr15:44671859-44788063|-	2.9374	1.85434	0.644756	0.00403575	181.779
ENSMUSG00000052137	Rbm12b2	RNA binding motif protein 12 B2 [Source:MGI Symbol;Acc:MGI:1924854]	chr4:12089439-12096243|+	20.1725	12.8808	0.644437	2.64e-10	930.705
ENSMUSG00000054604	Cggbp1	CGG triplet repeat binding protein 1 [Source:MGI Symbol;Acc:MGI:2146370]	chr16:64851996-64859507|+	0.568057	0.350913	0.644366	0.0592716	136.661
ENSMUSG00000025950	Idh1	isocitrate dehydrogenase 1 (NADP+), soluble [Source:MGI Symbol;Acc:MGI:96413]	chr1:65158616-65186500|-	11.5976	7.35839	0.643983	0.000398	400.868
ENSMUSG00000005864	Cnga2	cyclic nucleotide gated channel alpha 2 [Source:MGI Symbol;Acc:MGI:108040]	chrX:71991849-72010218|+	1.81548	1.14663	0.64277	0.00906105	81.3533
ENSMUSG00000028648	Ndufs5	NADH dehydrogenase (ubiquinone) Fe-S protein 5 [Source:MGI Symbol;Acc:MGI:1890889]	chr4:123712710-123718202|-	3.83521	2.38106	0.642307	0.0224848	106.825
ENSMUSG00000038141	Tmem181a	transmembrane protein 181A [Source:MGI Symbol;Acc:MGI:1924356]	chr17:6270470-6308314|+	6.60991	4.16992	0.642203	0.00308838	692.247
ENSMUSG00000074925	Ptar1	protein prenyltransferase alpha subunit repeat containing 1 [Source:MGI Symbol;Acc:MGI:1921875]	chr19:23687400-23721129|+	2.01572	1.26266	0.641107	0.0926704	63.4162
ENSMUSG00000007036	Abhd16a	abhydrolase domain containing 16A [Source:MGI Symbol;Acc:MGI:99476]	chr17:35089263-35102987|+	4.89087	3.11791	0.640836	0.000217	426.313
ENSMUSG00000004980	Hnrnpa2b1	heterogeneous nuclear ribonucleoprotein A2/B1 [Source:MGI Symbol;Acc:MGI:104819]	chr6:51460932-51469894|-	52.4018	33.7826	0.640508	5.11e-12	4007.56
ENSMUSG00000079465	Col4a3	collagen, type IV, alpha 3 [Source:MGI Symbol;Acc:MGI:104688]	chr1:82586921-82722059|+	2.94673	1.85821	0.640334	0.0110727	437.636
ENSMUSG00000049717	Lig4	ligase IV, DNA, ATP-dependent [Source:MGI Symbol;Acc:MGI:1335098]	chr8:9969049-9977686|-	16.4837	10.422	0.6397	0.000286	1415.88
ENSMUSG00000060679	Mrps9	mitochondrial ribosomal protein S9 [Source:MGI Symbol;Acc:MGI:1916777]	chr1:42851233-42905683|+	1.29997	0.82461	0.6384	0.0367294	93.3173
ENSMUSG00000028243	Ubxn2b	UBX domain protein 2B [Source:MGI Symbol;Acc:MGI:1915303]	chr4:6191098-6221688|+	2.51648	1.5998	0.636525	0.00132161	279.009
ENSMUSG00000027698	Nceh1	neutral cholesterol ester hydrolase 1 [Source:MGI Symbol;Acc:MGI:2443191]	chr3:27182965-27284608|+	28.376	18.1484	0.636362	0.000267	3676.59
ENSMUSG00000036168	Ccdc38	coiled-coil domain containing 38 [Source:MGI Symbol;Acc:MGI:2444738]	chr10:93540632-93584327|+	1.09346	0.682093	0.635953	0.04771	64.0435
ENSMUSG00000026072	Il1r1	interleukin 1 receptor, type I [Source:MGI Symbol;Acc:MGI:96545]	chr1:40225080-40317257|+	6.3607	4.05911	0.635757	0.000267	1664.47
ENSMUSG00000079658	Eloc	elongin C [Source:MGI Symbol;Acc:MGI:1915173]	chr1:16641725-16657042|-	35.8375	22.8705	0.635739	8.38e-05	2176.77
ENSMUSG00000039456	Morc3	microrchidia 3 [Source:MGI Symbol;Acc:MGI:2136841]	chr16:93832121-93876072|+	9.77351	6.23223	0.634377	0.000568	709.457
ENSMUSG00000051224	Tceanc	transcription elongation factor A (SII) N-terminal and central domain containing [Source:MGI Symbol;Acc:MGI:2685236]	chrX:166499812-166518567|-	4.29554	2.72006	0.634373	0.0123613	233.078
ENSMUSG00000027828	Ssr3	signal sequence receptor, gamma [Source:MGI Symbol;Acc:MGI:1914687]	chr3:65379655-65392623|-	28.5929	18.2504	0.634032	0.000121	2228.71
ENSMUSG00000072437	Nanos1	nanos homolog 1 (Drosophila) [Source:MGI Symbol;Acc:MGI:2669254]	chr19:60755987-60759913|+	14.3409	9.01956	0.633515	0.0144618	710.868
ENSMUSG00000050332	Amer1	APC membrane recruitment 1 [Source:MGI Symbol;Acc:MGI:1919595]	chrX:95420318-95444872|-	5.35636	3.43154	0.633154	0.000231	563.295
ENSMUSG00000021131	Erh	enhancer of rudimentary homolog (Drosophila) [Source:MGI Symbol;Acc:MGI:108089]	chr12:80634022-80644341|-	32.4319	20.9129	0.633149	1.05e-07	1011.81
ENSMUSG00000044026	Slc35g1	solute carrier family 35, member G1 [Source:MGI Symbol;Acc:MGI:2444789]	chr19:38395980-38405607|+	2.10955	1.3412	0.632552	0.0212309	160.63
ENSMUSG00000050232	Cxcr3	chemokine (C-X-C motif) receptor 3 [Source:MGI Symbol;Acc:MGI:1277207]	chrX:101731535-101734269|-	14.9189	9.55789	0.631412	0.000141	398.093
ENSMUSG00000027748	Trpc4	transient receptor potential cation channel, subfamily C, member 4 [Source:MGI Symbol;Acc:MGI:109525]	chr3:54156035-54318471|+	1.99798	1.27615	0.629711	0.0036714	291.915
ENSMUSG00000035596	Mboat7	membrane bound O-acyltransferase domain containing 7 [Source:MGI Symbol;Acc:MGI:1924832]	chr7:3677789-3693523|-	0.292649	0.181325	0.626251	0.0625295	82.3301
ENSMUSG00000071180	Smim15	small integral membrane protein 15 [Source:MGI Symbol;Acc:MGI:1922866]	chr13:108046424-108049146|+	8.94937	5.70297	0.623625	0.0118276	211.872
ENSMUSG00000025899	Alkbh8	alkB homolog 8, tRNA methyltransferase [Source:MGI Symbol;Acc:MGI:1914917]	chr9:3335140-3391154|+	0.559357	0.3568	0.62362	0.0537015	56.5705
ENSMUSG00000026011	Ctla4	cytotoxic T-lymphocyte-associated protein 4 [Source:MGI Symbol;Acc:MGI:88556]	chr1:60887000-60915832|+	2.06784	1.32366	0.623567	0.0469653	61.4205
ENSMUSG00000032515	Csrnp1	cysteine-serine-rich nuclear protein 1 [Source:MGI Symbol;Acc:MGI:2387989]	chr9:119971163-119984658|-	3.08994	1.97418	0.623026	0.0294598	133.244
ENSMUSG00000028702	Rad54l	RAD54 like (S. cerevisiae) [Source:MGI Symbol;Acc:MGI:894697]	chr4:116094264-116123690|-	2.60755	1.69097	0.622331	5.73e-06	305.152
ENSMUSG00000027810	Eif2a	eukaryotic translation initiation factor 2A [Source:MGI Symbol;Acc:MGI:1098684]	chr3:58525821-58557501|+	7.61055	4.93177	0.621726	0.000417	741.957
ENSMUSG00000022978	Mis18a	MIS18 kinetochore protein A [Source:MGI Symbol;Acc:MGI:1913828]	chr16:90719312-90727404|-	15.6283	10.0818	0.621529	4.24e-05	702.28
ENSMUSG00000028414	Fktn	fukutin [Source:MGI Symbol;Acc:MGI:2179507]	chr4:53713998-53777890|+	0.813907	0.517553	0.621094	0.0197551	133.222
ENSMUSG00000007613	Tgfbr1	transforming growth factor, beta receptor I [Source:MGI Symbol;Acc:MGI:98728]	chr4:47353222-47414931|+	2.61666	1.68856	0.620594	0.00763031	411.29
ENSMUSG00000027661	Slc2a10	solute carrier family 2 (facilitated glucose transporter), member 10 [Source:MGI Symbol;Acc:MGI:2156687]	chr2:165503787-165519917|+	2.12417	1.35861	0.619837	0.0294324	143.254
ENSMUSG00000009905	Kdsr	3-ketodihydrosphingosine reductase [Source:MGI Symbol;Acc:MGI:1918000]	chr1:106720459-106759727|-	1.96425	1.27111	0.619541	7.17e-05	349.945
ENSMUSG00000038807	Rap1gap2	RAP1 GTPase activating protein 2 [Source:MGI Symbol;Acc:MGI:3028623]	chr11:74383356-74610915|-	2.06814	1.32162	0.619228	0.0221165	213.152
ENSMUSG00000005566	Trim28	tripartite motif-containing 28 [Source:MGI Symbol;Acc:MGI:109274]	chr7:12999114-13031035|+	11.2754	7.1786	0.617538	0.00633311	1369.79
ENSMUSG00000022559	Fbxl6	F-box and leucine-rich repeat protein 6 [Source:MGI Symbol;Acc:MGI:1354705]	chr15:76535730-76538746|-	7.29187	4.69535	0.616799	0.000243	474.239
ENSMUSG00000078498	Zfp988	zinc finger protein 988 [Source:MGI Symbol;Acc:MGI:3651985]	chr4:147305674-147333734|+	3.57076	2.30773	0.61587	0.0161345	114.899
ENSMUSG00000069806	Cacng7	calcium channel, voltage-dependent, gamma subunit 7 [Source:MGI Symbol;Acc:MGI:1932374]	chr7:3332955-3368221|+	7.00758	4.55246	0.61522	0.0163981	227.251
ENSMUSG00000026843	Fubp3	far upstream element (FUSE) binding protein 3 [Source:MGI Symbol;Acc:MGI:2443699]	chr2:31572651-31617526|+	8.52414	5.55813	0.614707	1.32e-08	659.387
ENSMUSG00000038212	Mfsd14b	major facilitator superfamily domain containing 14B [Source:MGI Symbol;Acc:MGI:1913881]	chr13:65064663-65112975|-	5.29357	3.43501	0.614601	0.000179	547.914
ENSMUSG00000000420	Galnt1	UDP-N-acetyl-alpha-D-galactosamine:polypeptide N-acetylgalactosaminyltransferase 1 [Source:MGI Symbol;Acc:MGI:894693]	chr18:24205344-24286818|+	6.08662	3.96313	0.614315	3.48e-06	1027.32
ENSMUSG00000011179	Odc1	ornithine decarboxylase, structural 1 [Source:MGI Symbol;Acc:MGI:97402]	chr12:17544794-17551505|+	27.7141	17.5446	0.613873	0.0493292	1730.08
ENSMUSG00000034324	Tmem132c	transmembrane protein 132C [Source:MGI Symbol;Acc:MGI:2443061]	chr5:127241808-127565793|+	2.12057	1.37165	0.613497	0.00556953	198.658
ENSMUSG00000042279	H1foo	H1 histone family, member O, oocyte-specific [Source:MGI Symbol;Acc:MGI:2176207]	chr6:115944938-115950236|+	329.825	212.815	0.613312	0.000381	19008
ENSMUSG00000022394	L3mbtl2	l(3)mbt-like 2 (Drosophila) [Source:MGI Symbol;Acc:MGI:2443584]	chr15:81663889-81688315|+	2.99258	1.94209	0.611518	0.00059	465.337
ENSMUSG00000062762	Ei24	etoposide induced 2.4 mRNA [Source:MGI Symbol;Acc:MGI:108090]	chr9:36779159-36797393|-	5.98896	3.89735	0.611421	0.000577	377.171
ENSMUSG00000063049	Ing2	inhibitor of growth family, member 2 [Source:MGI Symbol;Acc:MGI:1916510]	chr8:47667178-47675556|-	3.16646	2.04796	0.611404	0.0159928	171.63
ENSMUSG00000021975	Ints9	integrator complex subunit 9 [Source:MGI Symbol;Acc:MGI:1098533]	chr14:64950045-65039835|+	25.7405	16.8204	0.610182	4.25e-10	3065.98
ENSMUSG00000026657	Frmd4a	FERM domain containing 4A [Source:MGI Symbol;Acc:MGI:1919850]	chr2:4017717-4614043|+	2.09842	1.35501	0.608594	0.016068	546.74
ENSMUSG00000035227	Spcs2	signal peptidase complex subunit 2 homolog (S. cerevisiae) [Source:MGI Symbol;Acc:MGI:1913874]	chr7:99837569-99863462|-	9.80725	6.39205	0.60754	0.000303	850.329
ENSMUSG00000030530	Furin	furin (paired basic amino acid cleaving enzyme) [Source:MGI Symbol;Acc:MGI:97513]	chr7:80388585-80405436|-	4.47567	2.92538	0.606765	1.21e-08	1982.23
ENSMUSG00000041765	Ubac2	ubiquitin associated domain containing 2 [Source:MGI Symbol;Acc:MGI:1916139]	chr14:121878606-122021034|+	22.5277	14.7914	0.606403	7.44e-08	916.877
ENSMUSG00000015619	Gata3	GATA binding protein 3 [Source:MGI Symbol;Acc:MGI:95663]	chr2:9857078-9890034|-	3.88137	2.52602	0.605375	0.00333824	184.395
ENSMUSG00000042377	Fam83g	family with sequence similarity 83, member G [Source:MGI Symbol;Acc:MGI:1916890]	chr11:61684091-61709951|+	2.14827	1.41704	0.604839	6.49e-06	883.805
ENSMUSG00000028179	Cth	cystathionase (cystathionine gamma-lyase) [Source:MGI Symbol;Acc:MGI:1339968]	chr3:157894248-157925077|-	10.2686	6.72823	0.604478	0.00491696	295.496
ENSMUSG00000055760	Gemin6	gem (nuclear organelle) associated protein 6 [Source:MGI Symbol;Acc:MGI:1914492]	chr17:80224441-80228497|+	6.94727	4.47693	0.603612	0.0143587	212.541
ENSMUSG00000021636	Marveld2	MARVEL (membrane-associating) domain containing 2 [Source:MGI Symbol;Acc:MGI:2446166]	chr13:100595957-100616971|-	7.43518	4.8127	0.602917	0.00549438	422.055
ENSMUSG00000047881	Rell1	RELT-like 1 [Source:MGI Symbol;Acc:MGI:2140767]	chr5:63908897-63968897|-	24.4231	15.9454	0.601563	8.4e-06	1195.86
ENSMUSG00000040410	Fbxl4	F-box and leucine-rich repeat protein 4 [Source:MGI Symbol;Acc:MGI:2140367]	chr4:22357543-22434091|+	1.87641	1.20537	0.600332	0.0664546	117.172
ENSMUSG00000075470	Alg10b	asparagine-linked glycosylation 10B (alpha-1,2-glucosyltransferase) [Source:MGI Symbol;Acc:MGI:2146159]	chr15:90224311-90230554|+	27.1609	17.6147	0.599772	0.000482	4430.63
ENSMUSG00000032044	Rpusd4	RNA pseudouridylate synthase domain containing 4 [Source:MGI Symbol;Acc:MGI:1919239]	chr9:35267865-35277731|+	2.73281	1.79776	0.599447	0.00397927	259.125
ENSMUSG00000046994	Mars2	methionine-tRNA synthetase 2 (mitochondrial) [Source:MGI Symbol;Acc:MGI:2444136]	chr1:55237177-55248470|+	1.44995	0.945759	0.597488	0.0521148	196.452
ENSMUSG00000021771	Vdac2	voltage-dependent anion channel 2 [Source:MGI Symbol;Acc:MGI:106915]	chr14:21831269-21845879|+	12.4035	8.15277	0.59744	0.000109	1003.55
ENSMUSG00000001441	Npepps	aminopeptidase puromycin sensitive [Source:MGI Symbol;Acc:MGI:1101358]	chr11:97205842-97280638|-	1.53762	0.995613	0.597346	0.0738814	141.695
ENSMUSG00000078139	AK157302	cDNA sequence AK157302 [Source:MGI Symbol;Acc:MGI:3574096]	chr13:21495223-21497146|+	4.13937	2.70766	0.596469	0.00143318	242.077
ENSMUSG00000024516	Sec11c	SEC11 homolog C, signal peptidase complex subunit [Source:MGI Symbol;Acc:MGI:1913536]	chr18:65800549-65817665|+	3.35807	2.18719	0.596419	0.00763031	280.143
ENSMUSG00000037106	Fer1l6	fer-1-like 6 (C. elegans) [Source:MGI Symbol;Acc:MGI:3645398]	chr15:58510048-58665092|+	1.44888	0.941085	0.59618	0.0507659	185.815
ENSMUSG00000044250	Pced1b	PC-esterase domain containing 1B [Source:MGI Symbol;Acc:MGI:2446270]	chr15:97247107-97385689|+	14.7606	9.60831	0.595704	0.00815587	692.245
ENSMUSG00000040297	Suco	SUN domain containing ossification factor [Source:MGI Symbol;Acc:MGI:2138346]	chr1:161816114-161876682|-	26.132	17.0577	0.593734	0.00012	7515.38
ENSMUSG00000021290	2010107E04Rik	RIKEN cDNA 2010107E04 gene [Source:MGI Symbol;Acc:MGI:1917507]	chr12:111961375-111966977|-	2.28056	1.47377	0.593536	0.052697	219.134
ENSMUSG00000032097	Ddx6	DEAD (Asp-Glu-Ala-Asp) box polypeptide 6 [Source:MGI Symbol;Acc:MGI:104976]	chr9:44604892-44640731|+	6.59774	4.36717	0.591495	0.000787	847.969
ENSMUSG00000024213	Nudt3	nudix (nucleotide diphosphate linked moiety X)-type motif 3 [Source:MGI Symbol;Acc:MGI:1928484]	chr17:27579382-27623465|-	3.08501	2.03353	0.590117	0.0218945	139.369
ENSMUSG00000063406	Tmed5	transmembrane p24 trafficking protein 5 [Source:MGI Symbol;Acc:MGI:1921586]	chr5:108106366-108132620|-	1.31231	0.867319	0.588892	0.00802723	188.347
ENSMUSG00000035109	Shc4	SHC (Src homology 2 domain containing) family, member 4 [Source:MGI Symbol;Acc:MGI:2655364]	chr2:125627447-125724148|-	1.08612	0.715483	0.586389	0.0254677	104.707
ENSMUSG00000012819	Cdh23	cadherin 23 (otocadherin) [Source:MGI Symbol;Acc:MGI:1890219]	chr10:60302748-60696490|-	0.410926	0.269653	0.585708	0.0107716	115.652
ENSMUSG00000074221	Zfp568	zinc finger protein 568 [Source:MGI Symbol;Acc:MGI:2142347]	chr7:29983955-30028282|+	15.4088	10.2707	0.585296	8e-11	1601.51
ENSMUSG00000024413	Npc1	Niemann-Pick type C1 [Source:MGI Symbol;Acc:MGI:1097712]	chr18:12189693-12236400|-	8.17651	5.34681	0.585279	0.00200962	5350.34
ENSMUSG00000048833	Slc39a9	solute carrier family 39 (zinc transporter), member 9 [Source:MGI Symbol;Acc:MGI:1914820]	chr12:80643883-80683342|+	0.629128	0.404923	0.585095	0.0309144	338.319
ENSMUSG00000040945	Rcc2	regulator of chromosome condensation 2 [Source:MGI Symbol;Acc:MGI:1919784]	chr4:140700541-140723220|+	26.9542	17.9196	0.584	9.87e-08	1445.29
ENSMUSG00000014504	srp.19	signal recognition particle 19 [Source:MGI Symbol;Acc:MGI:1913634]	chr18:34330847-34336599|+	5.66926	3.74681	0.583881	0.00253813	262.541
ENSMUSG00000039108	Lsm14b	LSM family member 14B [Source:MGI Symbol;Acc:MGI:3040677]	chr2:180024987-180035465|+	86.1274	56.4698	0.583203	0.000643	6549.55
ENSMUSG00000020561	Twistnb	twist basic helix-loop-helix transcription factor 1 neighbor [Source:MGI Symbol;Acc:MGI:106292]	chr12:33429635-33441392|+	4.00418	2.62459	0.583198	0.0341985	247.151
ENSMUSG00000037296	Lsm1	LSM1 homolog, mRNA degradation associated [Source:MGI Symbol;Acc:MGI:1914457]	chr8:25785288-25803975|+	8.40998	5.55764	0.582338	0.0100403	286.338
ENSMUSG00000044594	Serpinb3a	serine (or cysteine) peptidase inhibitor, clade B (ovalbumin), member 3A [Source:MGI Symbol;Acc:MGI:3573933]	chr1:107045587-107052303|-	6.17849	4.09302	0.581413	0.0237883	119.005
ENSMUSG00000022674	Ube2v2	ubiquitin-conjugating enzyme E2 variant 2 [Source:MGI Symbol;Acc:MGI:1917870]	chr16:15552677-15594524|-	1.70363	1.11784	0.581361	0.0377209	93.3411
ENSMUSG00000021277	Traf3	TNF receptor-associated factor 3 [Source:MGI Symbol;Acc:MGI:108041]	chr12:111166370-111267153|+	4.19341	2.79712	0.580941	2.03e-06	422.754
ENSMUSG00000049119	Fam110b	family with sequence similarity 110, member B [Source:MGI Symbol;Acc:MGI:1916593]	chr4:5644090-6108223|+	0.664178	0.437561	0.580734	0.0582214	78.4673
ENSMUSG00000071072	Ptges3	prostaglandin E synthase 3 (cytosolic) [Source:MGI Symbol;Acc:MGI:1929282]	chr10:128058954-128077272|+	132.178	88.0115	0.580403	0.000135	3142.3
ENSMUSG00000018509	Cenpv	centromere protein V [Source:MGI Symbol;Acc:MGI:1920389]	chr11:62524946-62539261|-	11.179	7.38943	0.580304	0.00803561	210.479
ENSMUSG00000048495	Tyw5	tRNA-yW synthesizing protein 5 [Source:MGI Symbol;Acc:MGI:1915986]	chr1:57388237-57407101|-	4.50927	2.97395	0.580213	0.0192051	164.607
ENSMUSG00000093930	Hmgcs1	3-hydroxy-3-methylglutaryl-Coenzyme A synthase 1 [Source:MGI Symbol;Acc:MGI:107592]	chr13:119690462-119708086|+	180.565	120.191	0.580209	2.75e-10	6588.22
ENSMUSG00000034795	Ccdc122	coiled-coil domain containing 122 [Source:MGI Symbol;Acc:MGI:1918358]	chr14:77036772-77112257|+	4.45544	2.9509	0.580146	0.0465704	109.719
ENSMUSG00000026977	2018-03-07	membrane-associated ring finger (C3HC4) 7 [Source:MGI Symbol;Acc:MGI:1931053]	chr2:60209887-60250676|+	1.19298	0.792462	0.579112	0.00191613	2478.43
ENSMUSG00000025544	Tm9sf2	transmembrane 9 superfamily member 2 [Source:MGI Symbol;Acc:MGI:1915309]	chr14:122107038-122159604|+	52.9013	34.9836	0.578837	6.31e-05	4816.99
ENSMUSG00000059447	Hadhb	hydroxyacyl-Coenzyme A dehydrogenase/3-ketoacyl-Coenzyme A thiolase/enoyl-Coenzyme A hydratase (trifunctional protein), beta subunit [Source:MGI Symbol;Acc:MGI:2136381]	chr5:30155248-30184593|+	3.57304	2.37186	0.578294	0.000774	361.638
ENSMUSG00000028618	Tmem59	transmembrane protein 59 [Source:MGI Symbol;Acc:MGI:1929278]	chr4:107178399-107200996|+	3.05911	2.03091	0.577678	0.00169362	519.973
ENSMUSG00000002475	Abhd3	abhydrolase domain containing 3 [Source:MGI Symbol;Acc:MGI:2147183]	chr18:10644411-10706771|-	3.56963	2.36818	0.577025	0.0185078	208.737
ENSMUSG00000052539	Magi3	membrane associated guanylate kinase, WW and PDZ domain containing 3 [Source:MGI Symbol;Acc:MGI:1923484]	chr3:104013259-104220374|-	3.69378	2.48	0.576934	4.11e-09	1015.43
ENSMUSG00000022533	Atp13a3	ATPase type 13A3 [Source:MGI Symbol;Acc:MGI:2685387]	chr16:30312423-30388837|-	32.4708	21.6595	0.576882	4.58e-09	6885.96
ENSMUSG00000046441	Cmtr2	cap methyltransferase 2 [Source:MGI Symbol;Acc:MGI:2384580]	chr8:110215665-110224486|+	23.0792	15.2189	0.576788	0.0123406	992.645
ENSMUSG00000002428	Hltf	helicase-like transcription factor [Source:MGI Symbol;Acc:MGI:1196437]	chr3:20057811-20118490|+	5.72069	3.82122	0.575623	0.00241472	446.125
ENSMUSG00000033931	Rbm34	RNA binding motif protein 34 [Source:MGI Symbol;Acc:MGI:1098653]	chr8:126947172-126971071|-	1.67101	1.1061	0.575408	0.0505942	123.315
ENSMUSG00000024258	Polr2d	polymerase (RNA) II (DNA directed) polypeptide D [Source:MGI Symbol;Acc:MGI:1916491]	chr18:31789159-31796642|+	39.0746	26.0838	0.57406	0.00051	1734.38
ENSMUSG00000024759	Atl3	atlastin GTPase 3 [Source:MGI Symbol;Acc:MGI:1924270]	chr19:7494040-7538608|+	1.92167	1.28375	0.573726	0.000417	1026.23
ENSMUSG00000027999	Pla2g12a	phospholipase A2, group XIIA [Source:MGI Symbol;Acc:MGI:1913600]	chr3:129878606-129895825|+	2.9964	1.98597	0.5732	0.0114496	256.807
ENSMUSG00000023892	Zfp51	zinc finger protein 51 [Source:MGI Symbol;Acc:MGI:99198]	chr17:21450352-21465591|+	20.8136	14.0146	0.573034	5.43e-08	756.024
ENSMUSG00000028271	Gtf2b	general transcription factor IIB [Source:MGI Symbol;Acc:MGI:2385191]	chr3:142765045-142783606|+	64.1956	43.0255	0.572647	2.4e-07	4071.03
ENSMUSG00000053024	Cntn2	contactin 2 [Source:MGI Symbol;Acc:MGI:104518]	chr1:132509427-132543256|-	2.52027	1.67418	0.572025	0.00852144	445.487
ENSMUSG00000002064	Sdf2	stromal cell derived factor 2 [Source:MGI Symbol;Acc:MGI:108019]	chr11:78245746-78255496|+	13.5977	9.0403	0.571889	0.00149742	515.206
ENSMUSG00000020212	Mdm1	transformed mouse 3T3 cell double minute 1 [Source:MGI Symbol;Acc:MGI:96951]	chr10:118141811-118168997|+	5.05552	3.40287	0.571692	0.00291954	308.369
ENSMUSG00000029190	D5Ertd579e	DNA segment, Chr 5, ERATO Doi 579, expressed [Source:MGI Symbol;Acc:MGI:1261849]	chr5:36600485-36696024|-	1.71422	1.15221	0.57065	0.000328	609.349
ENSMUSG00000041609	Bicdl1	BICD family like cargo adaptor 1 [Source:MGI Symbol;Acc:MGI:1922915]	chr5:115648175-115731621|-	2.00373	1.34403	0.569985	0.00958113	184.105
ENSMUSG00000034391	Fbxo15	F-box protein 15 [Source:MGI Symbol;Acc:MGI:1354755]	chr18:84935158-84981376|+	18.2757	12.2842	0.569058	0.0136017	280.78
ENSMUSG00000078500	Zfp986	zinc finger protein 986 [Source:MGI Symbol;Acc:MGI:3649925]	chr4:145868794-145899975|+	3.49718	2.30877	0.568758	0.0913105	61.2286
ENSMUSG00000062590	Armc9	armadillo repeat containing 9 [Source:MGI Symbol;Acc:MGI:1926045]	chr1:86154780-86278284|+	0.372348	0.245235	0.568696	0.0544563	94.859
ENSMUSG00000029434	Vps33a	VPS33A CORVET/HOPS core subunit [Source:MGI Symbol;Acc:MGI:1924823]	chr5:123528659-123573038|-	1.34988	0.902878	0.567793	0.0566117	77.8079
ENSMUSG00000020495	Smg8	smg-8 homolog, nonsense mediated mRNA decay factor (C. elegans) [Source:MGI Symbol;Acc:MGI:1921383]	chr11:87077732-87086774|-	14.4672	9.48352	0.566503	0.0551861	1721.76
ENSMUSG00000035725	Prkx	protein kinase, X-linked [Source:MGI Symbol;Acc:MGI:1309999]	chrX:77761411-77796278|-	3.56525	2.4048	0.565743	0.00144728	259.429
ENSMUSG00000061273	Mmgt1	membrane magnesium transporter 1 [Source:MGI Symbol;Acc:MGI:2384305]	chrX:56585512-56598069|-	5.1004	3.41452	0.56563	0.00892699	354.525
ENSMUSG00000020590	Snx13	sorting nexin 13 [Source:MGI Symbol;Acc:MGI:2661416]	chr12:35047186-35147479|+	5.67767	3.82621	0.565519	3.68e-06	1322.49
ENSMUSG00000052544	St6galnac3	ST6 (alpha-N-acetyl-neuraminyl-2,3-beta-galactosyl-1,3)-N-acetylgalactosaminide alpha-2,6-sialyltransferase 3 [Source:MGI Symbol;Acc:MGI:1341828]	chr3:153198266-153725174|-	1.70093	1.1244	0.564759	0.067353	316.023
ENSMUSG00000036061	Smug1	single-strand selective monofunctional uracil DNA glycosylase [Source:MGI Symbol;Acc:MGI:1918976]	chr15:103153307-103158002|-	21.7105	14.455	0.56384	0.00469937	1244.86
ENSMUSG00000040195	Nemp1	nuclear envelope integral membrane protein 1 [Source:MGI Symbol;Acc:MGI:2446113]	chr10:127666901-127701049|+	2.53986	1.68177	0.56281	0.0472771	384.719
ENSMUSG00000023027	Atf1	activating transcription factor 1 [Source:MGI Symbol;Acc:MGI:1298366]	chr15:100227819-100261244|+	134.324	90.0324	0.560716	0.00297731	4384.02
ENSMUSG00000061536	Sec22c	SEC22 homolog C, vesicle trafficking protein [Source:MGI Symbol;Acc:MGI:2447871]	chr9:121680045-121705490|-	2.28961	1.55223	0.560448	0.00066	259.644
ENSMUSG00000039395	Mreg	melanoregulin [Source:MGI Symbol;Acc:MGI:2151839]	chr1:72159442-72212307|-	9.14296	6.16703	0.560321	0.000354	274.601
ENSMUSG00000047115	Fam221a	family with sequence similarity 221, member A [Source:MGI Symbol;Acc:MGI:2442161]	chr6:49367739-49390539|+	4.9941	3.36901	0.558386	0.00516796	299.282
ENSMUSG00000024276	Zfp397	zinc finger protein 397 [Source:MGI Symbol;Acc:MGI:1916506]	chr18:23954688-23964671|+	2.11101	1.41777	0.557342	0.0453357	193.955
ENSMUSG00000046442	Ppm1e	protein phosphatase 1E (PP2C domain containing) [Source:MGI Symbol;Acc:MGI:2444096]	chr11:87226906-87359023|-	2.13343	1.435	0.557298	0.0213868	215.815
ENSMUSG00000039230	Tbcd	tubulin-specific chaperone d [Source:MGI Symbol;Acc:MGI:1919686]	chr11:121451949-121617164|+	0.440866	0.294598	0.556904	0.0705798	96.155
ENSMUSG00000066009	Zfp987	zinc finger protein 987 [Source:MGI Symbol;Acc:MGI:3702694]	chr4:146097298-146126621|+	3.5607	2.39621	0.555956	0.0242283	127.283
ENSMUSG00000033356	Pus7l	pseudouridylate synthase 7-like [Source:MGI Symbol;Acc:MGI:1926145]	chr15:94522688-94543547|-	1.60623	1.07052	0.555846	0.0985507	66.9288
ENSMUSG00000031853	Map3k21	mitogen-activated protein kinase kinase kinase 21 [Source:MGI Symbol;Acc:MGI:2385307]	chr8:125910450-125947440|+	2.49229	1.67063	0.554874	0.0449122	202.741
ENSMUSG00000004934	Pias4	protein inhibitor of activated STAT 4 [Source:MGI Symbol;Acc:MGI:2136940]	chr10:81153266-81167923|-	15.7589	10.7413	0.554441	5.43e-08	807.919
ENSMUSG00000030042	Pole4	polymerase (DNA-directed), epsilon 4 (p12 subunit) [Source:MGI Symbol;Acc:MGI:1914229]	chr6:82618992-82705365|-	79.506	54.0474	0.554282	1e-09	2510.22
ENSMUSG00000096687	Mfsd4b4	major facilitator superfamily domain containing 4B4 [Source:MGI Symbol;Acc:MGI:3035041]	chr10:39890018-39899238|-	6.47855	4.40041	0.554103	0.000478	505.56
ENSMUSG00000046133	C130073F10Rik	RIKEN cDNA C130073F10 gene [Source:MGI Symbol;Acc:MGI:3045359]	chr4:101890020-101893789|-	19.3759	13.0696	0.553927	0.0575178	308.867
ENSMUSG00000036285	Noa1	nitric oxide associated 1 [Source:MGI Symbol;Acc:MGI:1914306]	chr5:77294182-77310084|-	5.91863	4.00417	0.552862	0.00294553	386.465
ENSMUSG00000045482	Trrap	transformation/transcription domain-associated protein [Source:MGI Symbol;Acc:MGI:2153272]	chr5:144767732-144859778|+	4.47761	3.03111	0.552857	0.00270296	1429.97
ENSMUSG00000036275	9530068E07Rik	RIKEN cDNA 9530068E07 gene [Source:MGI Symbol;Acc:MGI:2654705]	chr11:52396428-52408728|+	45.433	30.7022	0.552169	5.05e-05	2768.31
ENSMUSG00000045967	Gpr158	G protein-coupled receptor 158 [Source:MGI Symbol;Acc:MGI:2441697]	chr2:21367542-21830547|+	1.41088	0.945248	0.551686	0.0732007	350.062
ENSMUSG00000079065	BC005561	cDNA sequence BC005561 [Source:MGI Symbol;Acc:MGI:3040669]	chr5:104508352-104522611|+	1.71162	1.141	0.5514	0.0721602	130.363
ENSMUSG00000035847	Ids	iduronate 2-sulfatase [Source:MGI Symbol;Acc:MGI:96417]	chrX:70343069-70365084|-	2.21408	1.49949	0.550358	0.0160705	169.209
ENSMUSG00000063316	Rpl27	ribosomal protein L27 [Source:MGI Symbol;Acc:MGI:98036]	chr11:101442298-101445529|+	4.1699	2.80885	0.547142	0.0493312	331.475
ENSMUSG00000020592	Sdc1	syndecan 1 [Source:MGI Symbol;Acc:MGI:1349162]	chr12:8771323-8793715|+	22.3649	15.2201	0.547011	4.53e-05	1748.96
ENSMUSG00000006205	Htra1	HtrA serine peptidase 1 [Source:MGI Symbol;Acc:MGI:1929076]	chr7:130936111-130985660|+	4.53455	3.05696	0.546815	0.0203175	237.217
ENSMUSG00000041837	Pdcd7	programmed cell death 7 [Source:MGI Symbol;Acc:MGI:1859170]	chr9:65346104-65359643|+	54.0742	37.1142	0.545176	1.03e-05	2304.27
ENSMUSG00000000378	Ccm2	cerebral cavernous malformation 2 [Source:MGI Symbol;Acc:MGI:2384924]	chr11:6546887-6596744|+	1.26031	0.84444	0.544943	0.0488805	130.681
ENSMUSG00000040363	Bcor	BCL6 interacting corepressor [Source:MGI Symbol;Acc:MGI:1918708]	chrX:12036740-12160355|-	1.80576	1.22168	0.543726	0.0593156	229.309
ENSMUSG00000003053	Cyp2c29	cytochrome P450, family 2, subfamily c, polypeptide 29 [Source:MGI Symbol;Acc:MGI:103238]	chr19:39269405-39330713|+	5.13554	3.48839	0.542702	0.0364037	222.578
ENSMUSG00000035329	Fbxo33	F-box protein 33 [Source:MGI Symbol;Acc:MGI:1917861]	chr12:59200655-59219725|-	17.1924	11.6813	0.542641	0.00285473	1056.08
ENSMUSG00000027173	Depdc7	DEP domain containing 7 [Source:MGI Symbol;Acc:MGI:2139258]	chr2:104721784-104742878|-	217.974	149.58	0.542151	1.53e-09	6895.18
ENSMUSG00000007476	Lrrc8a	leucine rich repeat containing 8A [Source:MGI Symbol;Acc:MGI:2652847]	chr2:30237715-30263790|+	5.22076	3.57948	0.542079	0.000157	400.991
ENSMUSG00000026960	Arl6ip6	ADP-ribosylation factor-like 6 interacting protein 6 [Source:MGI Symbol;Acc:MGI:1929507]	chr2:53191726-53219220|+	6.60073	4.47893	0.541635	0.0357044	240.793
ENSMUSG00000030754	Copb1	coatomer protein complex, subunit beta 1 [Source:MGI Symbol;Acc:MGI:1917599]	chr7:114215559-114254711|-	25.6355	17.4193	0.540698	0.000453	2549.46
ENSMUSG00000033943	Mga	MAX gene associated [Source:MGI Symbol;Acc:MGI:1352483]	chr2:119897228-119969581|+	10.6287	7.24464	0.539873	0.00110885	2698.55
ENSMUSG00000024091	Vapa	vesicle-associated membrane protein, associated protein A [Source:MGI Symbol;Acc:MGI:1353561]	chr17:65580056-65613555|-	26.969	18.1384	0.539838	0.0438387	627.456
ENSMUSG00000032279	Idh3a	isocitrate dehydrogenase 3 (NAD+) alpha [Source:MGI Symbol;Acc:MGI:1915084]	chr9:54586334-54604661|+	8.61727	5.89876	0.539427	0.000444	597.853
ENSMUSG00000032307	Ube2q2	ubiquitin-conjugating enzyme E2Q family member 2 [Source:MGI Symbol;Acc:MGI:2388672]	chr9:55148854-55207529|+	7.70026	5.20432	0.538787	0.0348491	492.025
ENSMUSG00000070498	Tmem132b	transmembrane protein 132B [Source:MGI Symbol;Acc:MGI:3609245]	chr5:125531774-125792583|+	9.55182	6.56906	0.538382	1.14e-05	1278.79
ENSMUSG00000040105	Plpp6	phospholipid phosphatase 6 [Source:MGI Symbol;Acc:MGI:1921661]	chr19:28963953-28966811|+	5.1394	3.50003	0.538169	0.00402638	348.087
ENSMUSG00000042203	Tbc1d22b	TBC1 domain family, member 22B [Source:MGI Symbol;Acc:MGI:2681867]	chr17:29549788-29606895|+	31.1054	21.5108	0.535835	1.16e-13	2188.48
ENSMUSG00000040548	Tex2	testis expressed gene 2 [Source:MGI Symbol;Acc:MGI:102465]	chr11:106502147-106613423|-	2.09262	1.41979	0.535604	0.00618918	1405.41
ENSMUSG00000031647	Mfap3l	microfibrillar-associated protein 3-like [Source:MGI Symbol;Acc:MGI:1918556]	chr8:60632827-60676729|+	0.794068	0.539859	0.535441	0.0839659	84.4793
ENSMUSG00000090470	Prr23a3	proline rich 23A, member 3 [Source:MGI Symbol;Acc:MGI:1919229]	chr9:98864767-98866583|+	15.2662	10.4734	0.535051	0.00117639	386.42
ENSMUSG00000038608	Dock10	dedicator of cytokinesis 10 [Source:MGI Symbol;Acc:MGI:2146320]	chr1:80501073-80758527|-	0.601413	0.40628	0.534927	0.0780298	228.276
ENSMUSG00000037490	Slc2a12	solute carrier family 2 (facilitated glucose transporter), member 12 [Source:MGI Symbol;Acc:MGI:3052471]	chr10:22645011-22704285|+	3.49932	2.40051	0.534912	0.0106085	256.437
ENSMUSG00000020948	Klhl28	kelch-like 28 [Source:MGI Symbol;Acc:MGI:1913939]	chr12:64938833-64965534|-	9.13058	6.24457	0.534592	0.00223856	924.684
ENSMUSG00000067787	Blcap	bladder cancer associated protein [Source:MGI Symbol;Acc:MGI:1858907]	chr2:157556362-157571274|-	20.8028	14.3349	0.533864	2.58e-05	1273.57
ENSMUSG00000027679	Dnajc19	DnaJ heat shock protein family (Hsp40) member C19 [Source:MGI Symbol;Acc:MGI:1914963]	chr3:34056020-34081321|-	1.00236	0.674768	0.533449	0.0835668	101.311
ENSMUSG00000045822	Zswim3	zinc finger SWIM-type containing 3 [Source:MGI Symbol;Acc:MGI:1914788]	chr2:164805098-164822130|+	33.161	22.231	0.532759	0.078844	2284.3
ENSMUSG00000022299	Slc25a32	solute carrier family 25, member 32 [Source:MGI Symbol;Acc:MGI:1917156]	chr15:39094191-39112716|-	10.4076	7.18341	0.530553	0.000647	709.343
ENSMUSG00000022262	Dnah5	dynein, axonemal, heavy chain 5 [Source:MGI Symbol;Acc:MGI:107718]	chr15:28203752-28472045|+	0.39639	0.270812	0.528736	0.0357719	162.511
ENSMUSG00000017740	Slc12a5	solute carrier family 12, member 5 [Source:MGI Symbol;Acc:MGI:1862037]	chr2:164960802-164999731|+	1.37999	0.94641	0.528517	0.00924101	424.943
ENSMUSG00000075700	Selenot	selenoprotein T [Source:MGI Symbol;Acc:MGI:1916477]	chr3:58576636-58593133|+	23.1322	15.8101	0.528509	0.001036	1813.76
ENSMUSG00000034101	Ctnnd1	catenin (cadherin associated protein), delta 1 [Source:MGI Symbol;Acc:MGI:105100]	chr2:84600071-84650765|-	4.22741	2.92905	0.5282	0.00169362	430.555
ENSMUSG00000027985	Lef1	lymphoid enhancer binding factor 1 [Source:MGI Symbol;Acc:MGI:96770]	chr3:131110471-131224356|+	15.1604	10.5255	0.527901	2.78e-06	1398.05
ENSMUSG00000032409	Atr	ataxia telangiectasia and Rad3 related [Source:MGI Symbol;Acc:MGI:108028]	chr9:95857597-95951781|+	1.80042	1.24396	0.527389	0.00029	815.239
ENSMUSG00000027882	Stxbp3	syntaxin binding protein 3 [Source:MGI Symbol;Acc:MGI:107362]	chr3:108793176-108840526|-	2.14307	1.47736	0.526685	0.0178562	191.41
ENSMUSG00000050199	Lgr4	leucine-rich repeat-containing G protein-coupled receptor 4 [Source:MGI Symbol;Acc:MGI:1891468]	chr2:109917647-110014257|+	0.808529	0.551067	0.526654	0.08813	111.507
ENSMUSG00000031022	BC051019	cDNA sequence BC051019 [Source:MGI Symbol;Acc:MGI:1928824]	chr7:109712181-109723850|-	10.0641	6.9691	0.525399	0.00842847	273.044
ENSMUSG00000031156	Slc35a2	solute carrier family 35 (UDP-galactose transporter), member A2 [Source:MGI Symbol;Acc:MGI:1345297]	chrX:7884028-7894492|+	1.24564	0.854801	0.525138	0.0949073	105.703
ENSMUSG00000032463	Faim	Fas apoptotic inhibitory molecule [Source:MGI Symbol;Acc:MGI:1344387]	chr9:98986373-99002021|+	4.3888	3.03982	0.524708	0.00712996	375.23
ENSMUSG00000040596	Pogk	pogo transposable element with KRAB domain [Source:MGI Symbol;Acc:MGI:1918842]	chr1:166384622-166409863|-	0.580712	0.398252	0.524415	0.0976076	69.673
ENSMUSG00000028970	Abcb1b	ATP-binding cassette, sub-family B (MDR/TAP), member 1B [Source:MGI Symbol;Acc:MGI:97568]	chr5:8798147-8866315|+	9.19745	6.38755	0.523956	1.08e-06	1466.42
ENSMUSG00000035285	Nat14	N-acetyltransferase 14 [Source:MGI Symbol;Acc:MGI:3039561]	chr7:4922028-4925006|+	1.87518	1.27977	0.523359	0.0678544	108.026
ENSMUSG00000021706	Zfyve16	zinc finger, FYVE domain containing 16 [Source:MGI Symbol;Acc:MGI:2145181]	chr13:92487108-92530868|-	3.35769	2.32589	0.523129	0.000423	410.66
ENSMUSG00000095996	Gm16513	predicted gene, Gm16513 [Source:MGI Symbol;Acc:MGI:2141041]	chr5:95182624-95195342|+	11.6054	8.00785	0.522205	0.0196966	558.334
ENSMUSG00000024014	Pim1	proviral integration site 1 [Source:MGI Symbol;Acc:MGI:97584]	chr17:29490812-29496111|+	7.34345	5.08638	0.522038	0.0142006	233.57
ENSMUSG00000047419	Cmya5	cardiomyopathy associated 5 [Source:MGI Symbol;Acc:MGI:1923719]	chr13:93040713-93144724|-	11.8632	8.26116	0.521917	1.74e-11	1905.62
ENSMUSG00000040016	Ptger3	prostaglandin E receptor 3 (subtype EP3) [Source:MGI Symbol;Acc:MGI:97795]	chr3:157566892-157645888|+	1.16164	0.805851	0.521218	0.0410129	158.287
ENSMUSG00000021990	Spata13	spermatogenesis associated 13 [Source:MGI Symbol;Acc:MGI:104838]	chr14:60634001-60764556|+	1.8335	1.27393	0.520824	0.00293996	231.345
ENSMUSG00000070639	Lrrc8b	leucine rich repeat containing 8 family, member B [Source:MGI Symbol;Acc:MGI:2141353]	chr5:105415775-105490074|+	46.4466	32.281	0.520363	1.31e-11	5703.82
ENSMUSG00000044864	Ankrd50	ankyrin repeat domain 50 [Source:MGI Symbol;Acc:MGI:2139777]	chr3:38449259-38484844|-	1.68403	1.15864	0.52036	0.0226015	408.362
ENSMUSG00000030897	Cnga4	cyclic nucleotide gated channel alpha 4 [Source:MGI Symbol;Acc:MGI:2664099]	chr7:105404568-105408742|+	2.73267	1.90098	0.520074	0.0310149	124.966
ENSMUSG00000031021	Tmem9b	TMEM9 domain family, member B [Source:MGI Symbol;Acc:MGI:1915254]	chr7:109735834-109752875|-	3.29794	2.29265	0.51994	0.0433416	122.647
ENSMUSG00000052955	Cpvl	carboxypeptidase, vitellogenic-like [Source:MGI Symbol;Acc:MGI:1918537]	chr6:53873279-53978671|-	2.31693	1.59734	0.519372	0.0924767	73.8477
ENSMUSG00000026623	Lpgat1	lysophosphatidylglycerol acyltransferase 1 [Source:MGI Symbol;Acc:MGI:2446186]	chr1:191717834-191784255|+	7.79041	5.42536	0.519337	2.38e-06	1488.74
ENSMUSG00000090150	Acad11	acyl-Coenzyme A dehydrogenase family, member 11 [Source:MGI Symbol;Acc:MGI:2143169]	chr9:104063377-104127725|+	1.00359	0.688641	0.519004	0.0194861	209.759
ENSMUSG00000034673	Pbx2	pre B cell leukemia homeobox 2 [Source:MGI Symbol;Acc:MGI:1341793]	chr17:34591266-34597400|+	13.9653	9.69115	0.518835	0.00163321	656.053
ENSMUSG00000004364	Cul3	cullin 3 [Source:MGI Symbol;Acc:MGI:1347360]	chr1:80264923-80340480|-	15.6551	10.7983	0.518581	0.00664903	1972.61
ENSMUSG00000021758	Ddx4	DEAD (Asp-Glu-Ala-Asp) box polypeptide 4 [Source:MGI Symbol;Acc:MGI:102670]	chr13:112598333-112652310|-	9.98095	6.92456	0.518515	0.00978078	566.605
ENSMUSG00000050424	Pnma5	paraneoplastic antigen family 5 [Source:MGI Symbol;Acc:MGI:2180566]	chrX:73033981-73037103|-	15.8899	11.053	0.518189	0.00480763	706.806
ENSMUSG00000050567	Maml1	mastermind like 1 (Drosophila) [Source:MGI Symbol;Acc:MGI:1890504]	chr11:50255634-50292311|-	5.76132	4.01986	0.517875	0.00596166	402.747
ENSMUSG00000095954	Gm3183	predicted gene 3183 [Source:MGI Symbol;Acc:MGI:3781362]	chr5:94865436-94885388|+	10.9121	7.55104	0.516901	0.0266085	524.783
ENSMUSG00000024968	Rcor2	REST corepressor 2 [Source:MGI Symbol;Acc:MGI:1859854]	chr19:7267325-7275225|+	2.16484	1.49669	0.516847	0.0532358	84.114
ENSMUSG00000041264	Uspl1	ubiquitin specific peptidase like 1 [Source:MGI Symbol;Acc:MGI:2442342]	chr5:149184350-149215434|+	2.96319	2.02639	0.516522	0.0815651	360.158
ENSMUSG00000043461	Sptssb	serine palmitoyltransferase, small subunit B [Source:MGI Symbol;Acc:MGI:1913433]	chr3:69819542-69859940|-	5.02538	3.47963	0.515386	0.0359058	143.024
ENSMUSG00000055912	Tmem150a	transmembrane protein 150A [Source:MGI Symbol;Acc:MGI:2385244]	chr6:72355447-72359762|+	4.48499	3.07355	0.515332	0.0575178	296.748
ENSMUSG00000028729	Ebna1bp2	EBNA1 binding protein 2 [Source:MGI Symbol;Acc:MGI:1916322]	chr4:118620799-118627776|+	7.22685	5.05965	0.515323	0.00501587	524.066
ENSMUSG00000062760	1810041L15Rik	RIKEN cDNA 1810041L15 gene [Source:MGI Symbol;Acc:MGI:1919551]	chr15:84379203-84447097|-	2.29037	1.5907	0.515259	0.00752814	443.033
ENSMUSG00000028902	Sf3a3	splicing factor 3a, subunit 3 [Source:MGI Symbol;Acc:MGI:1922312]	chr4:124714776-124732460|+	26.1663	18.3068	0.513263	2.35e-05	1410.79
ENSMUSG00000034190	Chmp7	charged multivesicular body protein 7 [Source:MGI Symbol;Acc:MGI:1913922]	chr14:69716979-69732570|-	8.43054	5.87427	0.511825	0.000998	454.733
ENSMUSG00000024072	Yipf4	Yip1 domain family, member 4 [Source:MGI Symbol;Acc:MGI:1915114]	chr17:74489493-74500277|+	10.8082	7.55098	0.511254	0.00337946	315.612
ENSMUSG00000028436	Dcaf12	DDB1 and CUL4 associated factor 12 [Source:MGI Symbol;Acc:MGI:1916220]	chr4:41291300-41314889|-	75.2596	52.8746	0.510641	3.22e-11	3996.73
ENSMUSG00000048897	Zfp710	zinc finger protein 710 [Source:MGI Symbol;Acc:MGI:1921747]	chr7:80024814-80094173|+	2.41048	1.67678	0.510362	0.0472685	423.009
ENSMUSG00000090290	Tarbp1	TAR RNA binding protein 1 [Source:MGI Symbol;Acc:MGI:4936930]	chr8:126425329-126475065|-	3.34837	2.32825	0.50985	0.0287709	365.436
ENSMUSG00000030084	Plxna1	plexin A1 [Source:MGI Symbol;Acc:MGI:107685]	chr6:89316314-89362620|-	8.81367	6.18861	0.509692	1.48e-07	2185.38
ENSMUSG00000016200	Syt14	synaptotagmin XIV [Source:MGI Symbol;Acc:MGI:2444490]	chr1:192891233-193035775|-	0.645775	0.446264	0.509609	0.0990177	112.609
ENSMUSG00000020321	Mdh1	malate dehydrogenase 1, NAD (soluble) [Source:MGI Symbol;Acc:MGI:97051]	chr11:21556787-21572367|-	15.6146	10.9604	0.509559	1.55e-05	608.426
ENSMUSG00000062518	Zfp534	zinc finger protein 534 [Source:MGI Symbol;Acc:MGI:3650650]	chr4:147673502-147702553|-	6.06579	4.24193	0.509438	0.00834861	220.467
ENSMUSG00000046709	Mapk10	mitogen-activated protein kinase 10 [Source:MGI Symbol;Acc:MGI:1346863]	chr5:102907948-103211334|-	1.07067	0.741754	0.509405	0.0540424	157.244
ENSMUSG00000030747	Dgat2	diacylglycerol O-acyltransferase 2 [Source:MGI Symbol;Acc:MGI:1915050]	chr7:99153658-99182719|-	0.968195	0.65385	0.50879	0.0461139	279.088
ENSMUSG00000035203	Epn1	epsin 1 [Source:MGI Symbol;Acc:MGI:1333763]	chr7:5080235-5098178|+	2.48435	1.72275	0.508607	0.0743795	97.388
ENSMUSG00000037434	Slc30a1	solute carrier family 30 (zinc transporter), member 1 [Source:MGI Symbol;Acc:MGI:1345281]	chr1:191906767-191913247|+	3.18861	2.20647	0.507824	0.0728484	632.055
ENSMUSG00000028182	Lrriq3	leucine-rich repeats and IQ motif containing 3 [Source:MGI Symbol;Acc:MGI:1921685]	chr3:155093434-155194280|+	8.13858	5.74096	0.506763	4.89e-06	509.916
ENSMUSG00000028420	Tmem38b	transmembrane protein 38B [Source:MGI Symbol;Acc:MGI:1098718]	chr4:53826045-53862019|+	9.51136	6.6859	0.506647	0.000326	642.102
ENSMUSG00000057455	Rit2	Ras-like without CAAX 2 [Source:MGI Symbol;Acc:MGI:108054]	chr18:30973489-31317290|-	3.02789	2.12556	0.506495	0.0345893	167.084
ENSMUSG00000003316	Glg1	golgi apparatus protein 1 [Source:MGI Symbol;Acc:MGI:104967]	chr8:111154421-111259216|-	1.14296	0.804385	0.506187	0.0178677	344.923
ENSMUSG00000021027	Ralgapa1	Ral GTPase activating protein, alpha subunit 1 [Source:MGI Symbol;Acc:MGI:1931050]	chr12:55602896-55821167|-	1.1436	0.803514	0.505583	0.00663281	199.88
ENSMUSG00000032050	Rdx	radixin [Source:MGI Symbol;Acc:MGI:97887]	chr9:52047173-52088735|+	214.064	150.35	0.505299	1.41e-08	33613.1
ENSMUSG00000040234	Tm7sf3	transmembrane 7 superfamily member 3 [Source:MGI Symbol;Acc:MGI:1914873]	chr6:146602352-146642824|-	22.1582	15.5326	0.505173	9.4e-05	2216.14
ENSMUSG00000073139	Tmem185a	transmembrane protein 185A [Source:MGI Symbol;Acc:MGI:2448555]	chrX:70459753-70477180|-	11.1066	7.81372	0.504683	3.05e-05	485.855
ENSMUSG00000022788	Fgd4	FYVE, RhoGEF and PH domain containing 4 [Source:MGI Symbol;Acc:MGI:2183747]	chr16:16416917-16600549|-	0.690789	0.484495	0.502508	0.00480791	193.382
ENSMUSG00000046062	Ppp1r15b	protein phosphatase 1, regulatory (inhibitor) subunit 15b [Source:MGI Symbol;Acc:MGI:2444211]	chr1:133131143-133139783|+	1.77661	1.24363	0.50237	0.0270985	894.689
ENSMUSG00000034320	Slc26a2	solute carrier family 26 (sulfate transporter), member 2 [Source:MGI Symbol;Acc:MGI:892977]	chr18:61192919-61211612|-	2.36896	1.65182	0.502079	0.0317304	569.844
ENSMUSG00000032116	Stt3a	STT3, subunit of the oligosaccharyltransferase complex, homolog A (S. cerevisiae) [Source:MGI Symbol;Acc:MGI:105124]	chr9:36729344-36767679|-	3.46529	2.42862	0.501626	0.00663024	1146.72
ENSMUSG00000048279	Sacs	sacsin [Source:MGI Symbol;Acc:MGI:1354724]	chr14:61138457-61240695|+	2.71952	1.90825	0.501522	0.002768	681.717
ENSMUSG00000067567	Hdac8	histone deacetylase 8 [Source:MGI Symbol;Acc:MGI:1917565]	chrX:102284639-102505359|-	1.73367	1.20681	0.500964	0.0550428	132.793
ENSMUSG00000021939	Ctsb	cathepsin B [Source:MGI Symbol;Acc:MGI:88561]	chr14:63122462-63145919|+	3.1518	2.1951	0.499688	0.055369	415.674
ENSMUSG00000030104	Edem1	ER degradation enhancer, mannosidase alpha-like 1 [Source:MGI Symbol;Acc:MGI:2180139]	chr6:108828641-108859356|+	7.23722	5.12001	0.497751	4.8e-07	844.69
ENSMUSG00000036822	Topors	topoisomerase I binding, arginine/serine-rich [Source:MGI Symbol;Acc:MGI:2146189]	chr4:40259601-40269850|-	24.4285	17.3103	0.497155	1.19e-05	1425.27
ENSMUSG00000046897	Zfp740	zinc finger protein 740 [Source:MGI Symbol;Acc:MGI:1915994]	chr15:102203648-102215606|+	2.56938	1.80129	0.496901	0.0198252	248.245
ENSMUSG00000055436	Srsf11	serine/arginine-rich splicing factor 11 [Source:MGI Symbol;Acc:MGI:1916457]	chr3:158010473-158036639|-	3.2758	2.3087	0.495878	0.026993	379.275
ENSMUSG00000023068	Nus1	NUS1 dehydrodolichyl diphosphate synthase subunit [Source:MGI Symbol;Acc:MGI:1196365]	chr10:52417547-52440183|+	29.438	20.5565	0.495459	0.00413559	4195.92
ENSMUSG00000063362	Alg11	asparagine-linked glycosylation 11 (alpha-1,2-mannosyltransferase) [Source:MGI Symbol;Acc:MGI:2142632]	chr8:22060721-22071627|+	3.21981	2.25072	0.495355	0.0770025	389.193
ENSMUSG00000020063	Sirt1	sirtuin 1 [Source:MGI Symbol;Acc:MGI:2135607]	chr10:63319005-63381704|-	10.3624	7.25448	0.495202	0.042899	902.53
ENSMUSG00000027835	Pdcd10	programmed cell death 10 [Source:MGI Symbol;Acc:MGI:1928396]	chr3:75516490-75556856|-	4.04566	2.82726	0.494633	0.0692293	202.059
ENSMUSG00000009995	Taz	tafazzin [Source:MGI Symbol;Acc:MGI:109626]	chrX:74281912-74290151|+	4.16803	2.94777	0.494097	0.00063	493.604
ENSMUSG00000017756	Slc12a7	solute carrier family 12, member 7 [Source:MGI Symbol;Acc:MGI:1342283]	chr13:73733094-73816754|+	0.776974	0.549191	0.493768	0.00701887	471.859
ENSMUSG00000034021	Pds5b	PDS5 cohesin associated factor B [Source:MGI Symbol;Acc:MGI:2140945]	chr5:150673739-150810690|+	6.71085	4.74151	0.493034	0.00177592	996.654
ENSMUSG00000031555	Adam9	a disintegrin and metallopeptidase domain 9 (meltrin gamma) [Source:MGI Symbol;Acc:MGI:105376]	chr8:24949611-25016927|-	2.84228	2.00279	0.492225	0.0209409	312.713
ENSMUSG00000095074	Gm3139	predicted gene 3139 [Source:MGI Symbol;Acc:MGI:3781318]	chr5:94526287-94546423|+	7.39722	5.21	0.491823	0.058546	341.972
ENSMUSG00000050890	Pdik1l	PDLIM1 interacting kinase 1 like [Source:MGI Symbol;Acc:MGI:2385213]	chr4:134275002-134287895|-	4.2387	3.00741	0.491523	0.00703441	358.934
ENSMUSG00000019732	Calr3	calreticulin 3 [Source:MGI Symbol;Acc:MGI:1920566]	chr8:72424176-72443870|-	10.926	7.75435	0.49119	0.00063	339.834
ENSMUSG00000020715	Ern1	endoplasmic reticulum (ER) to nucleus signalling 1 [Source:MGI Symbol;Acc:MGI:1930134]	chr11:106394650-106487852|-	44.0026	31.2269	0.491136	4.63e-09	18870.6
ENSMUSG00000033184	Tmed7	transmembrane p24 trafficking protein 7 [Source:MGI Symbol;Acc:MGI:1913926]	chr18:46560235-46597535|-	0.873612	0.614595	0.490992	0.0849059	142.498
ENSMUSG00000046330	Rpl37a	ribosomal protein L37a [Source:MGI Symbol;Acc:MGI:98068]	chr1:72711290-72713813|+	6.62526	4.67552	0.490796	0.00902615	280.391
ENSMUSG00000030094	Xpc	xeroderma pigmentosum, complementation group C [Source:MGI Symbol;Acc:MGI:103557]	chr6:91489305-91515888|-	2.72792	1.91802	0.490684	0.0325128	293.85
ENSMUSG00000022750	Klhl22	kelch-like 22 [Source:MGI Symbol;Acc:MGI:1337995]	chr16:17759618-17793382|+	2.52391	1.76523	0.490466	0.0873379	230.88
ENSMUSG00000061244	Exoc5	exocyst complex component 5 [Source:MGI Symbol;Acc:MGI:2145645]	chr14:49012146-49066653|-	1.7695	1.25145	0.490352	0.0278026	247.579
ENSMUSG00000003134	Tbc1d8	TBC1 domain family, member 8 [Source:MGI Symbol;Acc:MGI:1927225]	chr1:39371492-39478755|-	16.0867	11.3274	0.490335	0.00163321	2474.12
ENSMUSG00000067928	Zfp760	zinc finger protein 760 [Source:MGI Symbol;Acc:MGI:2679257]	chr17:21707741-21725636|+	4.20315	2.98075	0.489896	0.00411324	241.327
ENSMUSG00000020719	Ddx5	DEAD (Asp-Glu-Ala-Asp) box polypeptide 5 [Source:MGI Symbol;Acc:MGI:105037]	chr11:106780355-106789185|-	46.4326	33.0276	0.489833	4.58e-05	3648.6
ENSMUSG00000039270	Megf9	multiple EGF-like-domains 9 [Source:MGI Symbol;Acc:MGI:1918264]	chr4:70427065-70534995|-	0.878943	0.618883	0.489738	0.0522784	268.275
ENSMUSG00000048578	Mlec	malectin [Source:MGI Symbol;Acc:MGI:1924015]	chr5:115142981-115158179|-	2.34829	1.66963	0.489558	0.00785374	710.965
ENSMUSG00000048410	Zfp407	zinc finger protein 407 [Source:MGI Symbol;Acc:MGI:2685179]	chr18:84128027-84589725|-	2.7828	1.97705	0.489525	0.000275	826.388
ENSMUSG00000070923	Klhl9	kelch-like 9 [Source:MGI Symbol;Acc:MGI:2180122]	chr4:88718292-88722465|-	32.2179	22.8999	0.489318	6.7e-07	2178.9
ENSMUSG00000029729	Zkscan1	zinc finger with KRAB and SCAN domains 1 [Source:MGI Symbol;Acc:MGI:1921820]	chr5:138085084-138107822|+	11.2798	8.03259	0.488975	1.5e-05	1289.51
ENSMUSG00000028163	Nfkb1	nuclear factor of kappa light polypeptide gene enhancer in B cells 1, p105 [Source:MGI Symbol;Acc:MGI:97312]	chr3:135584655-135691547|-	1.13547	0.804428	0.488577	0.0366653	225.561
ENSMUSG00000028106	Rprd2	regulation of nuclear pre-mRNA domain containing 2 [Source:MGI Symbol;Acc:MGI:1922387]	chr3:95760341-95818863|-	3.98661	2.80927	0.488225	0.0107764	2654.72
ENSMUSG00000020091	Eif4ebp2	eukaryotic translation initiation factor 4E binding protein 2 [Source:MGI Symbol;Acc:MGI:109198]	chr10:61428491-61452661|-	8.12596	5.80477	0.487762	0.00349802	595.509
ENSMUSG00000020128	Vps54	VPS54 GARP complex subunit [Source:MGI Symbol;Acc:MGI:2178798]	chr11:21239281-21321136|+	3.88783	2.71734	0.487548	0.05918	666.78
ENSMUSG00000056124	B4galt6	UDP-Gal:betaGlcNAc beta 1,4-galactosyltransferase, polypeptide 6 [Source:MGI Symbol;Acc:MGI:1928380]	chr18:20684599-20746404|-	31.5043	22.409	0.486766	7.21e-08	2815.86
ENSMUSG00000028479	Gne	glucosamine (UDP-N-acetyl)-2-epimerase/N-acetylmannosamine kinase [Source:MGI Symbol;Acc:MGI:1354951]	chr4:44034075-44084177|-	2.51626	1.77783	0.486735	0.0240016	245.82
ENSMUSG00000024302	Dtna	dystrobrevin alpha [Source:MGI Symbol;Acc:MGI:106039]	chr18:23415135-23659715|+	1.58237	1.11453	0.48622	0.0417114	283.823
ENSMUSG00000023066	Rttn	rotatin [Source:MGI Symbol;Acc:MGI:2179288]	chr18:88971790-89131013|+	24.4782	17.3889	0.485558	2.93e-05	2836.1
ENSMUSG00000042032	Mat2b	methionine adenosyltransferase II, beta [Source:MGI Symbol;Acc:MGI:1913667]	chr11:40679314-40695203|-	183.638	130.123	0.485119	2.22e-05	11374.6
ENSMUSG00000040451	Sgms1	sphingomyelin synthase 1 [Source:MGI Symbol;Acc:MGI:2444110]	chr19:32122727-32389714|-	10.4818	7.42012	0.484973	0.00922626	1408.72
ENSMUSG00000027281	Slx4ip	SLX4 interacting protein [Source:MGI Symbol;Acc:MGI:1921493]	chr2:136891218-137071950|+	17.5695	12.5645	0.483586	4.99e-05	1716.03
ENSMUSG00000020612	Prkar1a	protein kinase, cAMP dependent regulatory, type I, alpha [Source:MGI Symbol;Acc:MGI:104878]	chr11:109649405-109669656|+	19.4127	13.8812	0.482912	2.8e-06	1216.42
ENSMUSG00000002017	Fam98a	family with sequence similarity 98, member A [Source:MGI Symbol;Acc:MGI:1919972]	chr17:75537086-75551946|-	33.839	24.03	0.48272	0.0111757	1469.33
ENSMUSG00000018481	Appbp2	amyloid beta precursor protein (cytoplasmic tail) binding protein 2 [Source:MGI Symbol;Acc:MGI:1914134]	chr11:85187262-85235130|-	11.479	8.17904	0.482573	0.001822	1112.64
ENSMUSG00000017485	Top2b	topoisomerase (DNA) II beta [Source:MGI Symbol;Acc:MGI:98791]	chr14:16365179-16430787|+	4.26827	3.04073	0.482262	0.00372677	426.653
ENSMUSG00000056300	Zfp981	zinc finger protein 981 [Source:MGI Symbol;Acc:MGI:3700965]	chr4:146502027-146539395|+	2.67515	1.90381	0.481754	0.0732953	93.6905
ENSMUSG00000029173	Sepsecs	Sep (O-phosphoserine) tRNA:Sec (selenocysteine) tRNA synthase [Source:MGI Symbol;Acc:MGI:1098791]	chr5:52640087-52669708|-	5.58113	3.96608	0.481309	0.0121124	776.435
ENSMUSG00000071350	Setdb2	SET domain, bifurcated 2 [Source:MGI Symbol;Acc:MGI:2685139]	chr14:59402009-59440884|-	7.72085	5.52485	0.47958	0.000815	407.235
ENSMUSG00000040354	Mars	methionine-tRNA synthetase [Source:MGI Symbol;Acc:MGI:1345633]	chr10:127296221-127311786|-	1.6349	1.17492	0.478685	0.0503374	212.978
ENSMUSG00000036438	Calm2	calmodulin 2 [Source:MGI Symbol;Acc:MGI:103250]	chr17:87433412-87446935|-	152.299	108.536	0.478177	0.00458881	4513.98
ENSMUSG00000050229	Pigm	phosphatidylinositol glycan anchor biosynthesis, class M [Source:MGI Symbol;Acc:MGI:1914806]	chr1:172376546-172384099|+	1.26104	0.89889	0.478082	0.0455676	283.857
ENSMUSG00000041857	Oosp1	oocyte secreted protein 1 [Source:MGI Symbol;Acc:MGI:2149290]	chr19:11667460-11691150|-	1015.89	730.914	0.477442	0.000112	15264.4
ENSMUSG00000091764	Zfp964	zinc finger protein 964 [Source:MGI Symbol;Acc:MGI:3646490]	chr8:69654479-69666982|+	1.32165	0.943007	0.476567	0.0414196	200.56
ENSMUSG00000032340	Neo1	neogenin [Source:MGI Symbol;Acc:MGI:1097159]	chr9:58874687-59036441|-	6.93951	4.97734	0.476173	2.48e-07	2960.35
ENSMUSG00000079036	Alkbh1	alkB homolog 1, histone H2A dioxygenase [Source:MGI Symbol;Acc:MGI:2384034]	chr12:87425840-87444017|-	2.6442	1.89744	0.476171	0.0330212	269.104
ENSMUSG00000021115	Vrk1	vaccinia related kinase 1 [Source:MGI Symbol;Acc:MGI:1261847]	chr12:106010228-106077426|+	9.72111	6.99016	0.475597	0.00105316	825.273
ENSMUSG00000049225	Pdp1	pyruvate dehyrogenase phosphatase catalytic subunit 1 [Source:MGI Symbol;Acc:MGI:2685870]	chr4:11958184-11966452|-	13.0642	9.35554	0.475257	0.00199764	877.227
ENSMUSG00000031028	Tub	tubby bipartite transcription factor [Source:MGI Symbol;Acc:MGI:2651573]	chr7:108950338-109034460|+	5.40697	3.87772	0.475131	0.00059	828.361
ENSMUSG00000031774	Fam192a	family with sequence similarity 192, member A [Source:MGI Symbol;Acc:MGI:1919637]	chr8:94574138-94601997|-	32.0151	23.1823	0.474589	0.00365885	1979.81
ENSMUSG00000021714	Cenpk	centromere protein K [Source:MGI Symbol;Acc:MGI:1926210]	chr13:104228955-104249615|+	11.0959	7.94802	0.474341	0.0325128	343.09
ENSMUSG00000048814	Lonrf2	LON peptidase N-terminal domain and ring finger 2 [Source:MGI Symbol;Acc:MGI:1920209]	chr1:38793645-38836711|-	3.29732	2.33624	0.473793	0.054241	312.49
ENSMUSG00000030304	Ergic2	ERGIC and golgi 2 [Source:MGI Symbol;Acc:MGI:1914706]	chr6:148179079-148212374|-	9.73198	6.97349	0.473654	0.0017969	1410.6
ENSMUSG00000036264	Fstl4	follistatin-like 4 [Source:MGI Symbol;Acc:MGI:2443199]	chr11:52764634-53188538|+	2.17077	1.5533	0.473307	0.0090011	334.368
ENSMUSG00000030386	Zfp606	zinc finger protein 606 [Source:MGI Symbol;Acc:MGI:1914620]	chr7:12478293-12496235|+	1.24881	0.89231	0.472838	0.0292255	181.711
ENSMUSG00000036197	Gxylt1	glucoside xylosyltransferase 1 [Source:MGI Symbol;Acc:MGI:2684933]	chr15:93239742-93275161|-	8.10112	5.81336	0.472297	0.000122	4318.76
ENSMUSG00000061410	Zcchc14	zinc finger, CCHC domain containing 14 [Source:MGI Symbol;Acc:MGI:2159407]	chr8:121598703-121652901|-	11.3651	8.20824	0.470655	8.86e-05	1240.88
ENSMUSG00000052485	Tmem171	transmembrane protein 171 [Source:MGI Symbol;Acc:MGI:2685751]	chr13:98686235-98694834|-	19.1488	13.6699	0.470448	0.0188564	473.687
ENSMUSG00000034300	Fam53c	family with sequence similarity 53, member C [Source:MGI Symbol;Acc:MGI:1913556]	chr18:34758906-34773760|+	113.836	82.1821	0.470265	0.000263	6475.06
ENSMUSG00000022247	Brix1	BRX1, biogenesis of ribosomes [Source:MGI Symbol;Acc:MGI:1915082]	chr15:10474779-10485947|-	101.437	73.5221	0.469926	2.94e-07	3900.51
ENSMUSG00000022807	Osbpl11	oxysterol binding protein-like 11 [Source:MGI Symbol;Acc:MGI:2146553]	chr16:33185071-33243311|+	47.5057	34.359	0.468863	3.22e-08	3010.61
ENSMUSG00000031835	Mbtps1	membrane-bound transcription factor peptidase, site 1 [Source:MGI Symbol;Acc:MGI:1927235]	chr8:119508156-119558735|-	1.23492	0.893227	0.4688	0.00321121	342.325
ENSMUSG00000024431	Nr3c1	nuclear receptor subfamily 3, group C, member 1 [Source:MGI Symbol;Acc:MGI:95824]	chr18:39410545-39491301|-	2.10577	1.5093	0.468632	0.0524305	195.608
ENSMUSG00000004642	Slbp	stem-loop binding protein [Source:MGI Symbol;Acc:MGI:108402]	chr5:33634952-33652574|-	233.56	167.575	0.468113	0.00163321	16263.5
ENSMUSG00000037475	Thoc2	THO complex 2 [Source:MGI Symbol;Acc:MGI:2442413]	chrX:41794991-41920674|-	14.9948	10.8068	0.46766	0.00695723	2734.67
ENSMUSG00000048264	Dip2c	disco interacting protein 2 homolog C [Source:MGI Symbol;Acc:MGI:1920179]	chr13:9276528-9668928|+	14.1307	10.1548	0.467312	0.00906105	1681.37
ENSMUSG00000022033	Pbk	PDZ binding kinase [Source:MGI Symbol;Acc:MGI:1289156]	chr14:65805837-65817822|+	14.9645	10.6247	0.467043	0.0583777	304.65
ENSMUSG00000089862	Umad1	UMAP1-MVP12 associated (UMA) domain containing 1 [Source:MGI Symbol;Acc:MGI:3840148]	chr6:8259288-8459470|+	3.241	2.33503	0.466694	0.00651935	204.395
ENSMUSG00000030092	Cntn6	contactin 6 [Source:MGI Symbol;Acc:MGI:1858223]	chr6:104492790-104863406|+	4.28221	3.09771	0.46572	0.00248104	362.302
ENSMUSG00000031262	Cenpi	centromere protein I [Source:MGI Symbol;Acc:MGI:2147897]	chrX:134308084-134362639|+	1.12159	0.803791	0.465449	0.0984034	89.1418
ENSMUSG00000086147	Zfp989	zinc finger protein 989 [Source:MGI Symbol;Acc:MGI:3651739]	chr4:146971976-146990755|+	3.99664	2.88278	0.465424	0.0579103	119.296
ENSMUSG00000027883	Gpsm2	G-protein signalling modulator 2 (AGS3-like, C. elegans) [Source:MGI Symbol;Acc:MGI:1923373]	chr3:108678638-108722309|-	2.41306	1.7337	0.4634	0.0310401	164.363
ENSMUSG00000024304	Cdh2	cadherin 2 [Source:MGI Symbol;Acc:MGI:88355]	chr18:16588877-16809246|-	8.02588	5.82197	0.462222	0.000155	856.505
ENSMUSG00000035273	Hpse	heparanase [Source:MGI Symbol;Acc:MGI:1343124]	chr5:100679484-100719716|-	6.49244	4.65078	0.461733	0.09855	356.364
ENSMUSG00000043639	Rbm20	RNA binding motif protein 20 [Source:MGI Symbol;Acc:MGI:1920963]	chr19:53677306-53867080|+	2.96383	2.15737	0.46171	0.000936	391.697
ENSMUSG00000026455	Klhl12	kelch-like 12 [Source:MGI Symbol;Acc:MGI:2385619]	chr1:134455531-134491018|+	2.50292	1.81961	0.461214	0.00589957	386.632
ENSMUSG00000028293	Slc35a1	solute carrier family 35 (CMP-sialic acid transporter), member 1 [Source:MGI Symbol;Acc:MGI:1345622]	chr4:34663257-34687438|-	11.3474	8.25302	0.461059	0.00795785	560.861
ENSMUSG00000071235	Vrtn	vertebrae development associated [Source:MGI Symbol;Acc:MGI:3588197]	chr12:84641019-84651455|+	51.173	37.1634	0.461053	0.000371	2870.94
ENSMUSG00000039789	Zfp597	zinc finger protein 597 [Source:MGI Symbol;Acc:MGI:1918313]	chr16:3858321-3884561|-	4.05883	2.94008	0.459913	0.0445701	383.577
ENSMUSG00000030536	Iqgap1	IQ motif containing GTPase activating protein 1 [Source:MGI Symbol;Acc:MGI:1352757]	chr7:80711583-80825974|-	1.18625	0.861592	0.459476	0.01195	434.644
ENSMUSG00000055184	Fam72a	family with sequence similarity 72, member A [Source:MGI Symbol;Acc:MGI:1919669]	chr1:131527903-131539872|+	8.8089	6.37543	0.459413	0.0396091	351.692
ENSMUSG00000058558	Rpl5	ribosomal protein L5 [Source:MGI Symbol;Acc:MGI:102854]	chr5:107900502-107909005|+	7.22158	5.23297	0.458757	0.0026765	2706.49
ENSMUSG00000042570	Mier2	MIER family member 2 [Source:MGI Symbol;Acc:MGI:1917677]	chr10:79540245-79555199|-	17.0303	12.3327	0.458269	0.000647	1329.88
ENSMUSG00000040151	Hs2st1	heparan sulfate 2-O-sulfotransferase 1 [Source:MGI Symbol;Acc:MGI:1346049]	chr3:144429706-144570181|-	19.4809	14.0804	0.458179	0.000577	3401.55
ENSMUSG00000029491	Pde6b	phosphodiesterase 6B, cGMP, rod receptor, beta polypeptide [Source:MGI Symbol;Acc:MGI:97525]	chr5:108388391-108432397|+	3.00177	2.17475	0.458042	0.0346674	318.709
ENSMUSG00000040396	Abhd13	abhydrolase domain containing 13 [Source:MGI Symbol;Acc:MGI:1916154]	chr8:9977707-9992155|+	17.1831	12.4275	0.457781	0.000646	2797.61
ENSMUSG00000001175	Calm1	calmodulin 1 [Source:MGI Symbol;Acc:MGI:88251]	chr12:100199435-100209814|+	119.704	87.1203	0.457138	2.19e-12	8323.1
ENSMUSG00000051413	Plagl2	pleiomorphic adenoma gene-like 2 [Source:MGI Symbol;Acc:MGI:1933165]	chr2:153227759-153241426|-	7.50951	5.44836	0.456434	0.00130185	879.414
ENSMUSG00000029569	Tmem168	transmembrane protein 168 [Source:MGI Symbol;Acc:MGI:1921794]	chr6:13580687-13608100|-	5.03722	3.67132	0.456263	0.00278921	564.964
ENSMUSG00000054446	Cpa1	carboxypeptidase A1, pancreatic [Source:MGI Symbol;Acc:MGI:88478]	chr6:30639218-30645363|+	59.1736	43.1494	0.455382	1.21e-06	2495.13
ENSMUSG00000018238	Gdf9	growth differentiation factor 9 [Source:MGI Symbol;Acc:MGI:95692]	chr11:53431023-53437904|+	271.477	195.294	0.455368	0.00617642	36198.3
ENSMUSG00000026748	Plxdc2	plexin domain containing 2 [Source:MGI Symbol;Acc:MGI:1914698]	chr2:16356304-16755839|+	2.68201	1.95448	0.453763	0.0142541	418.888
ENSMUSG00000052155	Acvr2a	activin receptor IIA [Source:MGI Symbol;Acc:MGI:102806]	chr2:48814109-48903269|+	1.33789	0.971829	0.45349	0.0531957	257.409
ENSMUSG00000070565	Rasal2	RAS protein activator like 2 [Source:MGI Symbol;Acc:MGI:2443881]	chr1:157135182-157412595|-	1.81247	1.31728	0.453324	0.0297833	527.229
ENSMUSG00000070780	Rbm47	RNA binding motif protein 47 [Source:MGI Symbol;Acc:MGI:2384294]	chr5:66016549-66173118|-	2.87806	2.08639	0.452801	0.0175463	297.715
ENSMUSG00000096259	Gm3106	predicted gene 3106 [Source:MGI Symbol;Acc:MGI:3781282]	chr5:94218005-94222010|+	16.9155	12.2997	0.452669	0.0181724	688.907
ENSMUSG00000074785	Plxnc1	plexin C1 [Source:MGI Symbol;Acc:MGI:1890127]	chr10:94790866-94944835|-	10.7061	7.81669	0.452632	1.79e-07	1552.73
ENSMUSG00000025938	Slco5a1	solute carrier organic anion transporter family, member 5A1 [Source:MGI Symbol;Acc:MGI:2443431]	chr1:12866549-12992650|-	2.3877	1.74696	0.452436	0.00253288	577.494
ENSMUSG00000022704	Qtrtd1	queuine tRNA-ribosyltransferase domain containing 1 [Source:MGI Symbol;Acc:MGI:1922194]	chr16:43861407-43926809|-	7.4061	5.35361	0.452268	0.0770025	459.61
ENSMUSG00000040738	Ints8	integrator complex subunit 8 [Source:MGI Symbol;Acc:MGI:1919906]	chr4:11199158-11254258|-	9.39027	6.83399	0.451899	0.000129	1001.9
ENSMUSG00000021540	Smad5	SMAD family member 5 [Source:MGI Symbol;Acc:MGI:1328787]	chr13:56703010-56742377|+	2.65703	1.93774	0.451728	0.0287017	307.706
ENSMUSG00000039285	Azi2	5-azacytidine induced gene 2 [Source:MGI Symbol;Acc:MGI:1351332]	chr9:118040499-118069794|+	2.54555	1.86351	0.450463	0.0118627	228.863
ENSMUSG00000035443	Thyn1	thymocyte nuclear protein 1 [Source:MGI Symbol;Acc:MGI:1925112]	chr9:26999710-27007336|+	3.16286	2.31247	0.449735	0.0295408	240.194
ENSMUSG00000027770	Dhx36	DEAH (Asp-Glu-Ala-His) box polypeptide 36 [Source:MGI Symbol;Acc:MGI:1919412]	chr3:62468013-62507004|-	4.57637	3.32693	0.44954	0.0175463	642.672
ENSMUSG00000036817	Sun1	Sad1 and UNC84 domain containing 1 [Source:MGI Symbol;Acc:MGI:1924303]	chr5:139200637-139249840|+	3.41546	2.48764	0.449345	0.00629442	774.259
ENSMUSG00000079003	Samd1	sterile alpha motif domain containing 1 [Source:MGI Symbol;Acc:MGI:2142433]	chr8:83997672-84000409|+	18.0916	13.2462	0.449067	0.000862	696.11
ENSMUSG00000025781	Atp5c1	ATP synthase, H+ transporting, mitochondrial F1 complex, gamma polypeptide 1 [Source:MGI Symbol;Acc:MGI:1261437]	chr2:10056016-10080510|-	13.8669	10.1437	0.448843	0.00307638	500.947
ENSMUSG00000087403	Kantr	Kdm5c adjacent non-coding transcript [Source:MGI Symbol;Acc:MGI:1920247]	chrX:152294828-152327495|-	12.3633	8.97118	0.448806	0.0228805	909.585
ENSMUSG00000028165	Cisd2	CDGSH iron sulfur domain 2 [Source:MGI Symbol;Acc:MGI:1914256]	chr3:135406412-135423925|-	4.25962	3.12517	0.44854	0.000307	428.201
ENSMUSG00000034112	Atp2c2	ATPase, Ca++ transporting, type 2C, member 2 [Source:MGI Symbol;Acc:MGI:1916297]	chr8:119700009-119757717|+	1.52678	1.10298	0.448209	0.0773246	477.012
ENSMUSG00000034263	Ints14	integrator complex subunit 14 [Source:MGI Symbol;Acc:MGI:1917132]	chr9:64960905-64986978|+	16.3027	11.9826	0.448026	0.00108424	1080.21
ENSMUSG00000039031	Arhgap18	Rho GTPase activating protein 18 [Source:MGI Symbol;Acc:MGI:1921160]	chr10:26753421-26918648|+	3.69362	2.70687	0.447738	0.00205076	364.949
ENSMUSG00000036676	Tmtc3	transmembrane and tetratricopeptide repeat containing 3 [Source:MGI Symbol;Acc:MGI:3036255]	chr10:100443902-100487350|-	10.9678	8.00122	0.447301	0.000612	2232.15
ENSMUSG00000042396	Rbm7	RNA binding motif protein 7 [Source:MGI Symbol;Acc:MGI:1914260]	chr9:48488701-48495299|-	16.1701	11.8129	0.447225	0.000259	1089.29
ENSMUSG00000035455	Fignl1	fidgetin-like 1 [Source:MGI Symbol;Acc:MGI:1890648]	chr11:11787431-11808962|-	6.96894	5.08628	0.447092	0.0016183	619.822
ENSMUSG00000050840	Cdh20	cadherin 20 [Source:MGI Symbol;Acc:MGI:1346069]	chr1:104768529-104995481|+	6.02719	4.40923	0.446938	0.0631231	319.472
ENSMUSG00000019794	Katna1	katanin p60 (ATPase-containing) subunit A1 [Source:MGI Symbol;Acc:MGI:1344353]	chr10:7726000-7763150|+	18.8862	13.7962	0.446743	0.00103299	593.354
ENSMUSG00000029093	Sorcs2	sortilin-related VPS10 domain containing receptor 2 [Source:MGI Symbol;Acc:MGI:1932289]	chr5:36017180-36398139|-	1.06458	0.778919	0.446564	0.0343897	182.427
ENSMUSG00000069476	Zfp616	zinc finger protein 616 [Source:MGI Symbol;Acc:MGI:3650906]	chr11:74069955-74087292|+	23.6488	17.3971	0.445621	6.33e-09	2007.53
ENSMUSG00000021451	Sema4d	sema domain, immunoglobulin domain (Ig), transmembrane domain (TM) and short cytoplasmic domain, (semaphorin) 4D [Source:MGI Symbol;Acc:MGI:109244]	chr13:51701246-51793747|-	5.04404	3.69283	0.445269	0.000106	1036.61
ENSMUSG00000054091	1810037I17Rik	RIKEN cDNA 1810037I17 gene [Source:MGI Symbol;Acc:MGI:1914954]	chr3:122924203-122926184|+	33.2109	24.2077	0.444946	0.0175663	437.108
ENSMUSG00000025986	Slc39a10	solute carrier family 39 (zinc transporter), member 10 [Source:MGI Symbol;Acc:MGI:1914515]	chr1:46807544-46892852|-	70.7774	51.8343	0.444906	6.63e-08	9380.5
ENSMUSG00000053600	Zfp472	zinc finger protein 472 [Source:MGI Symbol;Acc:MGI:2385049]	chr17:32965814-32979233|+	3.71845	2.72355	0.444395	0.060869	158.736
ENSMUSG00000031585	Gtf2e2	general transcription factor II E, polypeptide 2 (beta subunit) [Source:MGI Symbol;Acc:MGI:1915403]	chr8:33731833-33777173|+	10.8825	7.93043	0.44439	0.01767	429.849
ENSMUSG00000020115	Tbk1	TANK-binding kinase 1 [Source:MGI Symbol;Acc:MGI:1929658]	chr10:121546455-121586787|-	7.17992	5.27294	0.443768	0.0036714	355.272
ENSMUSG00000014498	Ankrd52	ankyrin repeat domain 52 [Source:MGI Symbol;Acc:MGI:2444029]	chr10:128377115-128408704|+	6.268	4.57549	0.443118	0.0272713	660.188
ENSMUSG00000025809	Itgb1	integrin beta 1 (fibronectin receptor beta) [Source:MGI Symbol;Acc:MGI:96610]	chr8:128685654-128733200|+	8.24579	6.03068	0.442598	0.0125069	853.502
ENSMUSG00000021180	Rps6ka5	ribosomal protein S6 kinase, polypeptide 5 [Source:MGI Symbol;Acc:MGI:1920336]	chr12:100548439-100726983|-	4.87416	3.5846	0.442552	0.00773778	896.534
ENSMUSG00000016028	Celsr1	cadherin, EGF LAG seven-pass G-type receptor 1 [Source:MGI Symbol;Acc:MGI:1100883]	chr15:85898758-86033777|-	2.59981	1.89707	0.442196	0.0299489	1147.33
ENSMUSG00000015968	Cacna1d	calcium channel, voltage-dependent, L type, alpha 1D subunit [Source:MGI Symbol;Acc:MGI:88293]	chr14:30039949-30491156|-	1.45641	1.07178	0.442157	0.0184676	234.158
ENSMUSG00000022177	Haus4	HAUS augmin-like complex, subunit 4 [Source:MGI Symbol;Acc:MGI:1261794]	chr14:54541785-54554361|-	53.2339	39.1117	0.442063	0.000385	1254.34
ENSMUSG00000061665	Cd2ap	CD2-associated protein [Source:MGI Symbol;Acc:MGI:1330281]	chr17:42792951-42876424|-	55.7081	41.1326	0.440872	2.61e-13	4988.26
ENSMUSG00000026873	Phf19	PHD finger protein 19 [Source:MGI Symbol;Acc:MGI:1921266]	chr2:34893757-34914026|-	2.25881	1.6511	0.440165	0.0543553	192.562
ENSMUSG00000020521	Rnft1	ring finger protein, transmembrane 1 [Source:MGI Symbol;Acc:MGI:1924142]	chr11:86484657-86499025|+	2.1449	1.57268	0.439824	0.024776	153.414
ENSMUSG00000020173	Cobl	cordon-bleu WH2 repeat [Source:MGI Symbol;Acc:MGI:105056]	chr11:12236608-12464960|-	7.64547	5.59277	0.439687	0.0800394	747.032
ENSMUSG00000055827	Gsdmc3	gasdermin C3 [Source:MGI Symbol;Acc:MGI:3580656]	chr15:63857724-63878558|-	16.2016	11.9414	0.439627	0.00728345	468.31
ENSMUSG00000037720	Tmem33	transmembrane protein 33 [Source:MGI Symbol;Acc:MGI:1915128]	chr5:67260565-67291461|+	1.30799	0.96027	0.437459	0.0302212	219.048
ENSMUSG00000053253	Ndfip2	Nedd4 family interacting protein 2 [Source:MGI Symbol;Acc:MGI:1923523]	chr14:105258573-105309298|+	4.79292	3.52475	0.436674	0.00247534	1423.87
ENSMUSG00000020522	Mfap3	microfibrillar-associated protein 3 [Source:MGI Symbol;Acc:MGI:1924068]	chr11:57518664-57533815|+	8.79745	6.4531	0.43619	0.00313843	1141.88
ENSMUSG00000048706	Lurap1l	leucine rich adaptor protein 1-like [Source:MGI Symbol;Acc:MGI:106510]	chr4:80910646-80955628|+	7.07619	5.22476	0.435874	0.0468202	454.169
ENSMUSG00000061778	Mospd2	motile sperm domain containing 2 [Source:MGI Symbol;Acc:MGI:1924013]	chrX:164936169-164980375|-	6.79886	5.01987	0.435833	0.00308838	747.769
ENSMUSG00000053604	Rpia	ribose 5-phosphate isomerase A [Source:MGI Symbol;Acc:MGI:103254]	chr6:70765720-70792232|-	9.78887	7.19205	0.435227	0.015804	548.538
ENSMUSG00000026842	Abl1	c-abl oncogene 1, non-receptor tyrosine kinase [Source:MGI Symbol;Acc:MGI:87859]	chr2:31688376-31804227|+	2.99074	2.1966	0.434921	0.0176416	610.641
ENSMUSG00000052707	Tnrc6a	trinucleotide repeat containing 6a [Source:MGI Symbol;Acc:MGI:2385292]	chr7:123123885-123195296|+	4.82238	3.55433	0.434583	0.00746425	736.707
ENSMUSG00000034075	Zdhhc5	zinc finger, DHHC domain containing 5 [Source:MGI Symbol;Acc:MGI:1923573]	chr2:84687970-84715180|-	44.5725	32.9621	0.43421	2.17e-06	3205.34
ENSMUSG00000059149	Mfsd4a	major facilitator superfamily domain containing 4A [Source:MGI Symbol;Acc:MGI:2442786]	chr1:132022806-132068062|-	6.43156	4.76629	0.433233	0.00501637	633.452
ENSMUSG00000030225	Dera	deoxyribose-phosphate aldolase (putative) [Source:MGI Symbol;Acc:MGI:1913762]	chr6:137754546-137857340|+	1.37981	1.00619	0.43314	0.0804771	321.152
ENSMUSG00000031320	Rps4x	ribosomal protein S4, X-linked [Source:MGI Symbol;Acc:MGI:98158]	chrX:102184941-102189394|-	5.75526	4.18197	0.433069	0.0676784	1322.24
ENSMUSG00000031667	Aktip	thymoma viral proto-oncogene 1 interacting protein [Source:MGI Symbol;Acc:MGI:3693832]	chr8:91111784-91199976|-	3.87018	2.85349	0.432743	0.00922198	443.791
ENSMUSG00000039485	Tspyl4	TSPY-like 4 [Source:MGI Symbol;Acc:MGI:106393]	chr10:34297442-34301320|+	11.7632	8.68332	0.432464	0.00971515	573.578
ENSMUSG00000027652	Ralgapb	Ral GTPase activating protein, beta subunit (non-catalytic) [Source:MGI Symbol;Acc:MGI:2444531]	chr2:158409848-158499253|+	10.7724	7.96821	0.431292	0.000267	3559.76
ENSMUSG00000003458	Ncstn	nicastrin [Source:MGI Symbol;Acc:MGI:1891700]	chr1:172066013-172082795|-	6.84116	5.03449	0.431074	0.0276524	489.473
ENSMUSG00000061882	Ccdc62	coiled-coil domain containing 62 [Source:MGI Symbol;Acc:MGI:2684996]	chr5:123930679-123969895|+	5.33708	3.952	0.431051	0.0224848	656.308
ENSMUSG00000037416	Dmxl1	Dmx-like 1 [Source:MGI Symbol;Acc:MGI:2443926]	chr18:49832670-49965473|+	5.87988	4.33114	0.430282	0.00149742	2457.85
ENSMUSG00000019992	Mtfr2	mitochondrial fission regulator 2 [Source:MGI Symbol;Acc:MGI:1919054]	chr10:20347770-20361304|+	18.618	13.8243	0.429814	0.000419	625.386
ENSMUSG00000021384	Susd3	sushi domain containing 3 [Source:MGI Symbol;Acc:MGI:1913579]	chr13:49230690-49248706|-	4.29732	3.16488	0.429067	0.046932	358.069
ENSMUSG00000028945	Rheb	Ras homolog enriched in brain [Source:MGI Symbol;Acc:MGI:97912]	chr5:24802823-24842624|-	6.0309	4.48417	0.428993	5.15e-05	842.278
ENSMUSG00000043909	Trp53bp1	transformation related protein 53 binding protein 1 [Source:MGI Symbol;Acc:MGI:1351320]	chr2:121193281-121271407|-	8.75036	6.50633	0.427927	0.00044	2401.7
ENSMUSG00000069441	Dsg1a	desmoglein 1 alpha [Source:MGI Symbol;Acc:MGI:94930]	chr18:20310811-20343350|+	1.3476	0.996084	0.426957	0.0932359	183.382
ENSMUSG00000028455	Stoml2	stomatin (Epb7.2)-like 2 [Source:MGI Symbol;Acc:MGI:1913842]	chr4:43027690-43031710|-	6.83877	5.08521	0.426667	0.0465816	425.322
ENSMUSG00000055302	Mrfap1	Morf4 family associated protein 1 [Source:MGI Symbol;Acc:MGI:1914818]	chr5:36794867-36796772|-	31.1726	23.1304	0.426593	0.000413	662.062
ENSMUSG00000075266	Cenpw	centromere protein W [Source:MGI Symbol;Acc:MGI:1913561]	chr10:30194569-30200560|-	1.86391	1.38597	0.426454	0.0339381	132.882
ENSMUSG00000001767	Crnkl1	Crn, crooked neck-like 1 (Drosophila) [Source:MGI Symbol;Acc:MGI:1914127]	chr2:145917479-145935014|-	134.426	100.442	0.426225	1.24e-06	7398.18
ENSMUSG00000024807	Syvn1	synovial apoptosis inhibitor 1, synoviolin [Source:MGI Symbol;Acc:MGI:1921376]	chr19:6046576-6053712|+	7.80612	5.79671	0.425123	0.00475033	1066.76
ENSMUSG00000024566	Atp9b	ATPase, class II, type 9B [Source:MGI Symbol;Acc:MGI:1354757]	chr18:80734143-80934058|-	1.39221	1.02788	0.424674	0.0989188	124.466
ENSMUSG00000055733	Nap1l3	nucleosome assembly protein 1-like 3 [Source:MGI Symbol;Acc:MGI:1859565]	chrX:122394565-122397401|-	3.6606	2.70611	0.424615	0.0727207	158.501
ENSMUSG00000015112	Slc25a13	solute carrier family 25 (mitochondrial carrier, adenine nucleotide translocator), member 13 [Source:MGI Symbol;Acc:MGI:1354721]	chr6:6041218-6217173|-	4.64337	3.43605	0.424417	0.0664546	230.767
ENSMUSG00000064210	Ano6	anoctamin 6 [Source:MGI Symbol;Acc:MGI:2145890]	chr15:95790843-95975464|+	2.59044	1.91669	0.424348	0.0444341	457.501
ENSMUSG00000017686	Rhot1	ras homolog family member T1 [Source:MGI Symbol;Acc:MGI:1926078]	chr11:80209019-80267907|+	15.0507	11.1669	0.423987	0.000123	2785.61
ENSMUSG00000029513	Prkab1	protein kinase, AMP-activated, beta 1 non-catalytic subunit [Source:MGI Symbol;Acc:MGI:1336167]	chr5:116013586-116024508|-	21.3681	15.9396	0.423798	2.41e-06	1648.78
ENSMUSG00000038759	Nup205	nucleoporin 205 [Source:MGI Symbol;Acc:MGI:2141625]	chr6:35177421-35247596|+	3.43729	2.54684	0.423174	0.00746425	504.646
ENSMUSG00000052798	Nup107	nucleoporin 107 [Source:MGI Symbol;Acc:MGI:2143854]	chr10:117750621-117792705|-	47.9162	35.7904	0.422985	1.55e-06	2838.26
ENSMUSG00000094622	Gm3055	predicted gene 3055 [Source:MGI Symbol;Acc:MGI:3809197]	chr10:81742821-81771161|-	5.13181	3.82264	0.422079	0.0037873	427.974
ENSMUSG00000003345	Csnk1g2	casein kinase 1, gamma 2 [Source:MGI Symbol;Acc:MGI:1920014]	chr10:80622838-80640749|+	13.152	9.87184	0.421865	0.0017969	888.751
ENSMUSG00000060036	Rpl3	ribosomal protein L3 [Source:MGI Symbol;Acc:MGI:1351605]	chr15:80077794-80091868|-	2.46516	1.82144	0.421697	0.0546368	267.199
ENSMUSG00000020029	Nudt4	nudix (nucleoside diphosphate linked moiety X)-type motif 4 [Source:MGI Symbol;Acc:MGI:1918457]	chr10:95547007-95564146|-	8.63986	6.43595	0.420995	0.037626	402.381
ENSMUSG00000029063	Nadk	NAD kinase [Source:MGI Symbol;Acc:MGI:2183149]	chr4:155562378-155591001|+	16.7637	12.3706	0.420842	0.0198471	914.304
ENSMUSG00000059288	Cdyl	chromodomain protein, Y chromosome-like [Source:MGI Symbol;Acc:MGI:1339956]	chr13:35659862-35874064|+	17.9701	13.4078	0.420116	0.00682514	1136.23
ENSMUSG00000057234	Mettl15	methyltransferase like 15 [Source:MGI Symbol;Acc:MGI:1924144]	chr2:109092297-109280748|-	3.55504	2.65152	0.420096	0.0802472	117.763
ENSMUSG00000027878	Notch2	notch 2 [Source:MGI Symbol;Acc:MGI:97364]	chr3:98013527-98150361|+	0.85518	0.632436	0.419781	0.03711	232.244
ENSMUSG00000023044	Csad	cysteine sulfinic acid decarboxylase [Source:MGI Symbol;Acc:MGI:2180098]	chr15:102176998-102189043|-	13.3905	9.97852	0.419674	0.0436263	524.323
ENSMUSG00000026111	Unc50	unc-50 homolog (C. elegans) [Source:MGI Symbol;Acc:MGI:1914637]	chr1:37430139-37439124|+	323.28	241.608	0.419053	2.04e-06	7413.35
ENSMUSG00000057841	Rpl32	ribosomal protein L32 [Source:MGI Symbol;Acc:MGI:98038]	chr6:115805505-115808747|-	16.2213	12.0777	0.418979	0.063266	735.252
ENSMUSG00000031634	Ufsp2	UFM1-specific peptidase 2 [Source:MGI Symbol;Acc:MGI:1913679]	chr8:45975528-45996958|+	4.4435	3.32008	0.418582	0.0114195	341.881
ENSMUSG00000055780	Usp26	ubiquitin specific peptidase 26 [Source:MGI Symbol;Acc:MGI:1933247]	chrX:51753959-51801233|-	3.00762	2.24673	0.418218	0.0610699	173.649
ENSMUSG00000002997	Prkar2b	protein kinase, cAMP dependent regulatory, type II beta [Source:MGI Symbol;Acc:MGI:97760]	chr12:31958476-32061296|-	9.85267	7.38014	0.418176	0.00599633	455.257
ENSMUSG00000028719	Cmpk1	cytidine monophosphate (UMP-CMP) kinase 1 [Source:MGI Symbol;Acc:MGI:1913838]	chr4:114959336-114987241|-	54.0095	40.2946	0.417918	5.03e-05	2004.91
ENSMUSG00000030291	Med21	mediator complex subunit 21 [Source:MGI Symbol;Acc:MGI:1347064]	chr6:146642547-146650732|+	30.3178	22.6607	0.417906	6.08e-06	1585.15
ENSMUSG00000026088	Mitd1	MIT, microtubule interacting and transport, domain containing 1 [Source:MGI Symbol;Acc:MGI:1916278]	chr1:37874801-37890411|-	4.87178	3.61429	0.41778	0.0711664	179.194
ENSMUSG00000046962	Zbtb21	zinc finger and BTB domain containing 21 [Source:MGI Symbol;Acc:MGI:1927240]	chr16:97947435-97962621|-	19.8358	14.8458	0.417734	0.000159	1681.44
ENSMUSG00000028838	Extl1	exostoses (multiple)-like 1 [Source:MGI Symbol;Acc:MGI:1888742]	chr4:134356372-134383850|-	6.83559	5.08177	0.417672	0.0698751	401.446
ENSMUSG00000045662	Henmt1	HEN1 methyltransferase homolog 1 (Arabidopsis) [Source:MGI Symbol;Acc:MGI:1913965]	chr3:108939873-108960774|+	12.436	9.28529	0.417216	0.00334627	849.102
ENSMUSG00000027712	Anxa5	annexin A5 [Source:MGI Symbol;Acc:MGI:106008]	chr3:36448923-36475894|-	3.9591	2.96697	0.417143	0.0981513	126.882
ENSMUSG00000019838	Slc16a10	solute carrier family 16 (monocarboxylic acid transporters), member 10 [Source:MGI Symbol;Acc:MGI:1919722]	chr10:40033532-40142258|-	13.4536	9.95989	0.416467	0.0118102	2791.77
ENSMUSG00000053289	Ddx10	DEAD (Asp-Glu-Ala-Asp) box polypeptide 10 [Source:MGI Symbol;Acc:MGI:1924841]	chr9:53098635-53248053|-	14.4656	10.8299	0.416155	0.00197022	715.269
ENSMUSG00000084883	Ccdc85c	coiled-coil domain containing 85C [Source:MGI Symbol;Acc:MGI:3644008]	chr12:108203602-108275425|-	7.52031	5.6286	0.416098	0.00420648	720.153
ENSMUSG00000040640	Erc2	ELKS/RAB6-interacting/CAST family member 2 [Source:MGI Symbol;Acc:MGI:1098749]	chr14:27622428-28478537|+	4.60141	3.44364	0.415874	0.00260657	593.423
ENSMUSG00000042834	Nrep	neuronal regeneration related protein [Source:MGI Symbol;Acc:MGI:99444]	chr18:33437019-33464029|-	7.20355	5.39798	0.415561	0.0101311	208.519
ENSMUSG00000047996	Prrg1	proline rich Gla (G-carboxyglutamic acid) 1 [Source:MGI Symbol;Acc:MGI:1917364]	chrX:78449613-78583896|-	3.60383	2.68771	0.414916	0.00842266	731.701
ENSMUSG00000018697	Aatf	apoptosis antagonizing transcription factor [Source:MGI Symbol;Acc:MGI:1929608]	chr11:84422855-84513522|-	6.22514	4.63399	0.414643	0.0206778	620.54
ENSMUSG00000040760	Appl1	adaptor protein, phosphotyrosine interaction, PH domain and leucine zipper containing 1 [Source:MGI Symbol;Acc:MGI:1920243]	chr14:26918988-26971232|-	18.7697	14.0297	0.414383	0.0128366	3713.97
ENSMUSG00000020458	Rtn4	reticulon 4 [Source:MGI Symbol;Acc:MGI:1915835]	chr11:29692947-29744331|+	4.62617	3.46853	0.413921	0.00922198	628.133
ENSMUSG00000073077	Gm7173	predicted gene 7173 [Source:MGI Symbol;Acc:MGI:3645063]	chrX:79266559-79517285|-	3.12096	2.33694	0.413823	0.0073365	448.925
ENSMUSG00000045414	1190002N15Rik	RIKEN cDNA 1190002N15 gene [Source:MGI Symbol;Acc:MGI:1916111]	chr9:94517864-94538081|-	19.1325	14.2156	0.413164	0.0115792	2760.87
ENSMUSG00000036810	Cnep1r1	CTD nuclear envelope phosphatase 1 regulatory subunit 1 [Source:MGI Symbol;Acc:MGI:1921981]	chr8:88118769-88135110|+	7.9582	5.95107	0.41294	0.0121124	471.094
ENSMUSG00000028646	Rragc	Ras-related GTP binding C [Source:MGI Symbol;Acc:MGI:1858751]	chr4:123917446-123936997|+	83.5359	62.7123	0.412776	2.71e-05	5087.69
ENSMUSG00000000303	Cdh1	cadherin 1 [Source:MGI Symbol;Acc:MGI:88354]	chr8:106603351-106670246|+	33.4458	24.9561	0.412374	0.00399035	5704.82
ENSMUSG00000060572	Mfap2	microfibrillar-associated protein 2 [Source:MGI Symbol;Acc:MGI:99559]	chr4:141010418-141015984|+	14.6797	10.9532	0.412144	0.0684268	572.058
ENSMUSG00000020598	Nrcam	neuronal cell adhesion molecule [Source:MGI Symbol;Acc:MGI:104750]	chr12:44328885-44601964|+	1.27282	0.950364	0.410578	0.0534934	391.039
ENSMUSG00000027957	Slc35a3	solute carrier family 35 (UDP-N-acetylglucosamine (UDP-GlcNAc) transporter), member 3 [Source:MGI Symbol;Acc:MGI:1917648]	chr3:116669470-116712831|-	1.5299	1.15093	0.410007	0.0260289	294.631
ENSMUSG00000058793	Cds2	CDP-diacylglycerol synthase (phosphatidate cytidylyltransferase) 2 [Source:MGI Symbol;Acc:MGI:1332236]	chr2:132263148-132312050|+	1.925	1.44312	0.409578	0.0528299	574.691
ENSMUSG00000068184	Ndufaf2	NADH dehydrogenase (ubiquinone) 1 alpha subcomplex, assembly factor 2 [Source:MGI Symbol;Acc:MGI:1922847]	chr13:108052590-108158625|-	37.1996	27.971	0.409542	0.0209429	321.13
ENSMUSG00000039016	Timm8b	translocase of inner mitochondrial membrane 8B [Source:MGI Symbol;Acc:MGI:1353424]	chr9:50603910-50605320|+	47.7268	35.9795	0.409103	0.00590908	335.006
ENSMUSG00000031545	Gpat4	glycerol-3-phosphate acyltransferase 4 [Source:MGI Symbol;Acc:MGI:2142716]	chr8:23171265-23208346|-	5.7557	4.33793	0.408904	0.00179365	552.667
ENSMUSG00000052446	Zfp961	zinc finger protein 961 [Source:MGI Symbol;Acc:MGI:3583954]	chr8:71951038-71993792|+	34.5963	26.1224	0.40748	2.5e-05	1935.1
ENSMUSG00000063145	Bbs5	Bardet-Biedl syndrome 5 (human) [Source:MGI Symbol;Acc:MGI:1919819]	chr2:69647171-69667571|+	8.81151	6.5989	0.407298	0.0592375	267.044
ENSMUSG00000032320	Rcn2	reticulocalbin 2 [Source:MGI Symbol;Acc:MGI:1349765]	chr9:56041845-56061882|+	16.3668	12.3197	0.40688	0.00587699	1731.22
ENSMUSG00000032030	Cul5	cullin 5 [Source:MGI Symbol;Acc:MGI:1922967]	chr9:53614582-53670014|-	20.1654	15.1624	0.404778	0.0345893	2356.7
ENSMUSG00000070871	Ccnyl1	cyclin Y-like 1 [Source:MGI Symbol;Acc:MGI:2138614]	chr1:64690455-64725644|+	10.3038	7.76866	0.403261	0.000946	1885.74
ENSMUSG00000039156	Stim2	stromal interaction molecule 2 [Source:MGI Symbol;Acc:MGI:2151156]	chr5:53998499-54121057|+	5.41537	4.07803	0.402916	0.0465704	796.323
ENSMUSG00000040405	Havcr1	hepatitis A virus cellular receptor 1 [Source:MGI Symbol;Acc:MGI:2159680]	chr11:46735080-46779578|+	6.35806	4.77492	0.40282	0.0704197	204.05
ENSMUSG00000022724	Riox2	ribosomal oxygenase 2 [Source:MGI Symbol;Acc:MGI:1914264]	chr16:59471775-59492461|+	2.52612	1.9051	0.402786	0.0534934	236.26
ENSMUSG00000029253	Cenpc1	centromere protein C1 [Source:MGI Symbol;Acc:MGI:99700]	chr5:86012024-86065583|-	4.80116	3.61765	0.401797	0.0544527	411.205
ENSMUSG00000022744	Cldnd1	claudin domain containing 1 [Source:MGI Symbol;Acc:MGI:2447860]	chr16:58727910-58734251|+	20.0418	15.1351	0.401693	0.000291	750.448
ENSMUSG00000096156	Gm9242	predicted pseudogene 9242 [Source:MGI Symbol;Acc:MGI:3645172]	chr16:97490047-97491120|+	14.4405	10.9063	0.401434	0.00752814	227.796
ENSMUSG00000049739	Zfp646	zinc finger protein 646 [Source:MGI Symbol;Acc:MGI:3665412]	chr7:127876221-127885996|+	2.20072	1.67178	0.400997	0.0330366	361.718
ENSMUSG00000027367	Stard7	START domain containing 7 [Source:MGI Symbol;Acc:MGI:2139090]	chr2:127270218-127298932|+	19.9858	15.0653	0.400932	0.000423	1750.34
ENSMUSG00000037818	Abhd18	abhydrolase domain containing 18 [Source:MGI Symbol;Acc:MGI:1915468]	chr3:40846970-40938138|+	1.47829	1.11314	0.400542	0.0640492	232.872
ENSMUSG00000031922	Cep57	centrosomal protein 57 [Source:MGI Symbol;Acc:MGI:1915551]	chr9:13807792-13827107|-	7.38605	5.55458	0.400444	0.0899015	398.603
ENSMUSG00000027006	Dnajc10	DnaJ heat shock protein family (Hsp40) member C10 [Source:MGI Symbol;Acc:MGI:1914111]	chr2:80315466-80354043|+	2.7986	2.09739	0.400104	0.0265624	649.026
ENSMUSG00000050468	Astl	astacin-like metalloendopeptidase (M12 family) [Source:MGI Symbol;Acc:MGI:3046414]	chr2:127338639-127357651|+	6.2608	4.69844	0.399993	0.0496622	1672.32
ENSMUSG00000031497	Tnfsf13b	tumor necrosis factor (ligand) superfamily, member 13b [Source:MGI Symbol;Acc:MGI:1344376]	chr8:10006467-10039072|+	5.82032	4.41936	0.399198	0.0233523	437.039
ENSMUSG00000027167	Elp4	elongator acetyltransferase complex subunit 4 [Source:MGI Symbol;Acc:MGI:1925016]	chr2:105701027-105904564|-	4.65949	3.52252	0.399112	0.0537015	201.715
ENSMUSG00000043831	Lysmd4	LysM, putative peptidoglycan-binding, domain containing 4 [Source:MGI Symbol;Acc:MGI:1922349]	chr7:67222544-67307330|+	4.98021	3.77076	0.398516	0.0105075	672.903
ENSMUSG00000041431	Ccnb1	cyclin B1 [Source:MGI Symbol;Acc:MGI:88302]	chr13:100778650-100786570|-	216.809	163.767	0.39806	0.00232887	12065.3
ENSMUSG00000023886	Smoc2	SPARC related modular calcium binding 2 [Source:MGI Symbol;Acc:MGI:1929881]	chr17:14279506-14404790|+	4.66473	3.49762	0.397096	0.0524577	563.099
ENSMUSG00000021413	Prpf4b	pre-mRNA processing factor 4B [Source:MGI Symbol;Acc:MGI:109584]	chr13:34875302-34906064|+	5.59106	4.24484	0.39584	0.0647003	790.649
ENSMUSG00000040139	9430038I01Rik	RIKEN cDNA 9430038I01 gene [Source:MGI Symbol;Acc:MGI:1924502]	chr7:137375574-137410762|-	2.47794	1.87477	0.395767	0.0497858	205.316
ENSMUSG00000021360	Gcnt2	glucosaminyl (N-acetyl) transferase 2, I-branching enzyme [Source:MGI Symbol;Acc:MGI:1100870]	chr13:40859768-40960891|+	2.65612	2.01083	0.39557	0.0398616	262.93
ENSMUSG00000016559	H3f3b	H3 histone, family 3B [Source:MGI Symbol;Acc:MGI:1101768]	chr11:116021912-116027962|-	139.12	105.391	0.395157	0.000532	4744.53
ENSMUSG00000028587	Orc1	origin recognition complex, subunit 1 [Source:MGI Symbol;Acc:MGI:1328337]	chr4:108579423-108614833|+	22.2087	16.8937	0.395044	0.00278666	1264.41
ENSMUSG00000038600	Atp6v0a4	ATPase, H+ transporting, lysosomal V0 subunit A4 [Source:MGI Symbol;Acc:MGI:2153480]	chr6:38048483-38124586|-	4.73417	3.59196	0.394612	0.0340501	359.39
ENSMUSG00000025903	Lypla1	lysophospholipase 1 [Source:MGI Symbol;Acc:MGI:1344588]	chr1:4807788-4848410|+	3.36483	2.53918	0.394339	0.042899	303.287
ENSMUSG00000053470	Kdm3a	lysine (K)-specific demethylase 3A [Source:MGI Symbol;Acc:MGI:98847]	chr6:71588972-71632990|-	1.55803	1.18051	0.394197	0.092001	149.278
ENSMUSG00000036934	4921524J17Rik	RIKEN cDNA 4921524J17 gene [Source:MGI Symbol;Acc:MGI:1913964]	chr8:85408759-85432833|-	47.0651	35.7646	0.392792	0.000525	1440.21
ENSMUSG00000031878	Nae1	NEDD8 activating enzyme E1 subunit 1 [Source:MGI Symbol;Acc:MGI:2384561]	chr8:104511028-104534637|-	12.5881	9.59432	0.392559	4.58e-05	1445.12
ENSMUSG00000002897	Il17ra	interleukin 17 receptor A [Source:MGI Symbol;Acc:MGI:107399]	chr6:120463247-120487559|+	1.18739	0.901457	0.392539	0.0745048	549.748
ENSMUSG00000027884	Clcc1	chloride channel CLIC-like 1 [Source:MGI Symbol;Acc:MGI:2385186]	chr3:108653913-108678840|+	57.1116	43.4548	0.392298	0.000197	4751.99
ENSMUSG00000063953	Amd2	S-adenosylmethionine decarboxylase 2 [Source:MGI Symbol;Acc:MGI:1333111]	chr10:35708675-35711892|-	20.2788	15.2604	0.392262	0.0600973	776.493
ENSMUSG00000020120	Plek	pleckstrin [Source:MGI Symbol;Acc:MGI:1860485]	chr11:16971206-17052381|-	8.78345	6.65029	0.392236	0.0647003	494.161
ENSMUSG00000025059	Gk	glycerol kinase [Source:MGI Symbol;Acc:MGI:106594]	chrX:85701937-85776819|-	7.76825	5.91003	0.391903	0.00260657	822.388
ENSMUSG00000028710	Atpaf1	ATP synthase mitochondrial F1 complex assembly factor 1 [Source:MGI Symbol;Acc:MGI:2180560]	chr4:115784812-115818828|+	6.40965	4.88296	0.391569	0.00420648	354.044
ENSMUSG00000028920	Fbxo42	F-box protein 42 [Source:MGI Symbol;Acc:MGI:1924992]	chr4:141147913-141204062|+	30.7938	23.4651	0.391526	3.32e-06	2454.13
ENSMUSG00000021357	Exoc2	exocyst complex component 2 [Source:MGI Symbol;Acc:MGI:1913732]	chr13:30813919-30974093|-	8.92161	6.80743	0.391518	0.000552	785.168
ENSMUSG00000062908	Acadm	acyl-Coenzyme A dehydrogenase, medium chain [Source:MGI Symbol;Acc:MGI:87867]	chr3:153922357-153944632|-	5.27718	4.02488	0.391514	0.0196287	270.422
ENSMUSG00000060445	Sycp2	synaptonemal complex protein 2 [Source:MGI Symbol;Acc:MGI:1933281]	chr2:178345293-178407685|-	9.26332	7.03479	0.391222	0.0086499	1095.41
ENSMUSG00000022043	Trim35	tripartite motif-containing 35 [Source:MGI Symbol;Acc:MGI:1914104]	chr14:66297031-66311424|+	4.14555	3.14328	0.390868	0.0648355	289.278
ENSMUSG00000038069	Cdkn2aip	CDKN2A interacting protein [Source:MGI Symbol;Acc:MGI:1918175]	chr8:47709344-47713932|-	7.39084	5.63813	0.390429	0.0233523	517.819
ENSMUSG00000009733	Tfcp2	transcription factor CP2 [Source:MGI Symbol;Acc:MGI:98509]	chr15:100502799-100552008|-	2.60203	1.98117	0.390193	0.082302	157.344
ENSMUSG00000021640	Naip1	NLR family, apoptosis inhibitory protein 1 [Source:MGI Symbol;Acc:MGI:1298223]	chr13:100407764-100452869|-	4.32305	3.29901	0.389129	0.0346674	455.208
ENSMUSG00000028343	Erp44	endoplasmic reticulum protein 44 [Source:MGI Symbol;Acc:MGI:1923549]	chr4:48193323-48279558|-	2.51089	1.91676	0.389088	0.0362452	555.874
ENSMUSG00000052566	Hook2	hook microtubule tethering protein 2 [Source:MGI Symbol;Acc:MGI:2181664]	chr8:84990603-85003349|+	5.1463	3.92515	0.388017	0.0789147	258.601
ENSMUSG00000023087	Noct	nocturnin [Source:MGI Symbol;Acc:MGI:109382]	chr3:51224447-51251644|+	29.9513	22.8109	0.387491	0.00245604	4368.96
ENSMUSG00000032252	Glce	glucuronyl C5-epimerase [Source:MGI Symbol;Acc:MGI:2136405]	chr9:62057248-62122655|-	14.4539	11.0336	0.387218	0.0030852	8680.14
ENSMUSG00000061048	Cdh3	cadherin 3 [Source:MGI Symbol;Acc:MGI:88356]	chr8:106510891-106557297|+	7.09644	5.43533	0.387053	2.9e-05	881.529
ENSMUSG00000000168	Dlat	dihydrolipoamide S-acetyltransferase (E2 component of pyruvate dehydrogenase complex) [Source:MGI Symbol;Acc:MGI:2385311]	chr9:50634633-50659780|-	15.7157	12.0114	0.386381	0.00155417	1224.79
ENSMUSG00000048058	Ldlrad3	low density lipoprotein receptor class A domain containing 3 [Source:MGI Symbol;Acc:MGI:2138856]	chr2:101950203-102186385|-	7.85818	5.95466	0.384965	0.0337993	1087.65
ENSMUSG00000004462	Tbccd1	TBCC domain containing 1 [Source:MGI Symbol;Acc:MGI:1917823]	chr16:22813215-22857569|-	5.45566	4.17921	0.384036	0.00547748	433.745
ENSMUSG00000041891	Lman1	lectin, mannose-binding, 1 [Source:MGI Symbol;Acc:MGI:1917611]	chr18:65980754-66022580|-	8.31868	6.36645	0.382992	0.00248788	1268.83
ENSMUSG00000024712	Rfk	riboflavin kinase [Source:MGI Symbol;Acc:MGI:1914688]	chr19:17394043-17401349|+	26.7849	20.5033	0.382896	0.00290414	1059.11
ENSMUSG00000048109	Rbm15	RNA binding motif protein 15 [Source:MGI Symbol;Acc:MGI:2443205]	chr3:107325421-107333673|-	3.87394	2.96527	0.382268	0.0298186	644.531
ENSMUSG00000064368	mt-Nd6	mitochondrially encoded NADH dehydrogenase 6 [Source:MGI Symbol;Acc:MGI:102495]	chrM:13552-14070|-	696.208	532.754	0.381892	0.00906105	4054.69
ENSMUSG00000038697	Taf5l	TATA-box binding protein associated factor 5 like [Source:MGI Symbol;Acc:MGI:1919039]	chr8:123996318-124021397|-	5.76032	4.40481	0.381521	0.0144072	490.801
ENSMUSG00000040043	Rbms2	RNA binding motif, single stranded interacting protein 2 [Source:MGI Symbol;Acc:MGI:1861776]	chr10:128131558-128180297|-	5.19831	4.00511	0.381262	0.0293044	462.647
ENSMUSG00000029015	Slc26a5	solute carrier family 26, member 5 [Source:MGI Symbol;Acc:MGI:1933154]	chr5:21810655-21865604|-	5.28922	4.05866	0.379825	0.0770025	249.54
ENSMUSG00000045427	Hnrnph2	heterogeneous nuclear ribonucleoprotein H2 [Source:MGI Symbol;Acc:MGI:1201779]	chrX:134601179-134607060|+	5.52027	4.24108	0.378844	0.00917333	336.91
ENSMUSG00000026283	Ing5	inhibitor of growth family, member 5 [Source:MGI Symbol;Acc:MGI:1922816]	chr1:93803965-93822101|+	6.70206	5.1185	0.378763	0.0399974	632.685
ENSMUSG00000012443	Kif11	kinesin family member 11 [Source:MGI Symbol;Acc:MGI:1098231]	chr19:37376403-37421859|+	20.9133	15.9978	0.378245	0.0200565	1707.04
ENSMUSG00000029250	Polr2b	polymerase (RNA) II (DNA directed) polypeptide B [Source:MGI Symbol;Acc:MGI:2388280]	chr5:77310147-77349324|+	23.539	18.1534	0.377893	0.000482	2015.23
ENSMUSG00000055917	Zfp277	zinc finger protein 277 [Source:MGI Symbol;Acc:MGI:1890393]	chr12:40315046-40445902|-	9.23689	7.11791	0.377235	0.000266	1815.49
ENSMUSG00000021969	Zdhhc20	zinc finger, DHHC domain containing 20 [Source:MGI Symbol;Acc:MGI:1923215]	chr14:57832702-57890262|-	6.5143	5.00738	0.376233	0.00634481	588.825
ENSMUSG00000022751	Nit2	nitrilase family, member 2 [Source:MGI Symbol;Acc:MGI:1261838]	chr16:57156671-57167332|-	13.809	10.6255	0.376169	0.0749731	298.229
ENSMUSG00000041708	Mpped1	metallophosphoesterase domain containing 1 [Source:MGI Symbol;Acc:MGI:106316]	chr15:83779467-83858494|+	6.1371	4.70647	0.376149	0.00598493	547.016
ENSMUSG00000021716	Srek1ip1	splicing regulatory glutamine/lysine-rich protein 1interacting protein 1 [Source:MGI Symbol;Acc:MGI:1914538]	chr13:104792484-104839274|+	52.2531	40.3266	0.375929	0.000689	2546.4
ENSMUSG00000027238	Frmd5	FERM domain containing 5 [Source:MGI Symbol;Acc:MGI:2442557]	chr2:121545529-121807087|-	2.08549	1.599	0.375714	0.0475469	416.857
ENSMUSG00000038773	Kdm3b	KDM3B lysine (K)-specific demethylase 3B [Source:MGI Symbol;Acc:MGI:1923356]	chr18:34777008-34839370|+	7.23101	5.55513	0.375621	0.00917333	827.421
ENSMUSG00000022663	Atg3	autophagy related 3 [Source:MGI Symbol;Acc:MGI:1915091]	chr16:45158785-45188538|+	17.8161	13.7294	0.374646	0.0451665	727.903
ENSMUSG00000037376	Trmt6	tRNA methyltransferase 6 [Source:MGI Symbol;Acc:MGI:1914176]	chr2:132804207-132816055|-	3.22218	2.48908	0.374388	0.030476	235.756
ENSMUSG00000074123	7420426K07Rik	RIKEN cDNA 7420426K07 gene [Source:MGI Symbol;Acc:MGI:3588253]	chr9:98903119-98904622|+	145.879	112.876	0.374328	0.000291	2492.72
ENSMUSG00000069378	Prdm6	PR domain containing 6 [Source:MGI Symbol;Acc:MGI:2684938]	chr18:53464546-53575907|+	11.453	8.83401	0.374171	0.00440714	527.472
ENSMUSG00000021645	Smn1	survival motor neuron 1 [Source:MGI Symbol;Acc:MGI:109257]	chr13:100124852-100137690|+	28.2745	21.907	0.373842	0.0103217	1106.51
ENSMUSG00000017929	B4galt5	UDP-Gal:betaGlcNAc beta 1,4-galactosyltransferase, polypeptide 5 [Source:MGI Symbol;Acc:MGI:1927169]	chr2:167298444-167349183|-	21.4564	16.5864	0.373452	0.00180935	1553.77
ENSMUSG00000031954	Cfdp1	craniofacial development protein 1 [Source:MGI Symbol;Acc:MGI:1344403]	chr8:111768491-111854291|-	30.8691	23.8645	0.37316	0.010495	895.483
ENSMUSG00000022708	Zbtb20	zinc finger and BTB domain containing 20 [Source:MGI Symbol;Acc:MGI:1929213]	chr16:42875881-43642602|+	1.59893	1.23131	0.372428	0.0357719	635.247
ENSMUSG00000019857	Asf1a	anti-silencing function 1A histone chaperone [Source:MGI Symbol;Acc:MGI:1913653]	chr10:53596757-53609225|+	41.3006	31.9379	0.371508	0.000566	2182.62
ENSMUSG00000022684	Bfar	bifunctional apoptosis regulator [Source:MGI Symbol;Acc:MGI:1914368]	chr16:13671858-13703612|+	4.60674	3.55308	0.371457	0.0505942	335.351
ENSMUSG00000047221	Fam185a	family with sequence similarity 185, member A [Source:MGI Symbol;Acc:MGI:2140983]	chr5:21424958-21482124|+	9.22209	7.10145	0.371427	0.0436263	452.016
ENSMUSG00000074102	Rbm15b	RNA binding motif protein 15B [Source:MGI Symbol;Acc:MGI:1923598]	chr9:106880918-106887428|-	5.90059	4.56964	0.370312	0.00297265	460.004
ENSMUSG00000022136	Dnajc3	DnaJ heat shock protein family (Hsp40) member C3 [Source:MGI Symbol;Acc:MGI:107373]	chr14:118937932-118981702|+	30.0074	23.106	0.369773	0.00752814	5829.27
ENSMUSG00000026917	Wdr5	WD repeat domain 5 [Source:MGI Symbol;Acc:MGI:2155884]	chr2:27515157-27536535|+	46.273	35.8567	0.369704	4.67e-07	2861.44
ENSMUSG00000022837	Iqcb1	IQ calmodulin-binding motif containing 1 [Source:MGI Symbol;Acc:MGI:2443764]	chr16:36828385-36872721|+	4.08418	3.14921	0.36954	0.0528835	361.644
ENSMUSG00000063142	Kcnma1	potassium large conductance calcium-activated channel, subfamily M, alpha member 1 [Source:MGI Symbol;Acc:MGI:99923]	chr14:23289431-24004859|-	3.98168	3.09255	0.369338	0.0103562	389.063
ENSMUSG00000042507	Elmsan1	ELM2 and Myb/SANT-like domain containing 1 [Source:MGI Symbol;Acc:MGI:2685106]	chr12:84149176-84218881|-	4.33898	3.35159	0.369302	0.0155236	431.212
ENSMUSG00000031517	Gpm6a	glycoprotein m6a [Source:MGI Symbol;Acc:MGI:107671]	chr8:54954843-55060871|+	8.96428	6.91508	0.369287	0.0161863	578.752
ENSMUSG00000021639	Gtf2h2	general transcription factor II H, polypeptide 2 [Source:MGI Symbol;Acc:MGI:1345669]	chr13:100460218-100492579|-	12.6495	9.78643	0.369084	0.00885799	1020.78
ENSMUSG00000022034	Esco2	establishment of sister chromatid cohesion N-acetyltransferase 2 [Source:MGI Symbol;Acc:MGI:1919238]	chr14:65819038-65833994|-	70.9551	54.8759	0.3687	0.00130185	3786.2
ENSMUSG00000051989	Smim11	small integral membrane protein 11 [Source:MGI Symbol;Acc:MGI:1916186]	chr16:92301286-92313041|+	38.0356	29.3999	0.368549	0.024788	437.621
ENSMUSG00000020134	Peli1	pellino 1 [Source:MGI Symbol;Acc:MGI:1914495]	chr11:21091291-21150323|+	3.47302	2.69094	0.368538	0.00810509	841.659
ENSMUSG00000055942	Obox7	oocyte specific homeobox 7 [Source:MGI Symbol;Acc:MGI:3646231]	chr7:14659496-14665996|+	101.098	78.7062	0.368408	0.0137319	2108.95
ENSMUSG00000030180	Kdm5a	lysine (K)-specific demethylase 5A [Source:MGI Symbol;Acc:MGI:2136980]	chr6:120364124-120444574|+	1.10098	0.851183	0.366863	0.09855	218.096
ENSMUSG00000025077	Dclre1a	DNA cross-link repair 1A [Source:MGI Symbol;Acc:MGI:1930042]	chr19:56529167-56548222|-	12.8664	9.89513	0.366569	0.0161863	2204.91
ENSMUSG00000027130	Slc12a6	solute carrier family 12, member 6 [Source:MGI Symbol;Acc:MGI:2135960]	chr2:112265825-112363163|+	1.0056	0.77919	0.36652	0.0337284	250.084
ENSMUSG00000022844	Pdia5	protein disulfide isomerase associated 5 [Source:MGI Symbol;Acc:MGI:1919849]	chr16:35397313-35490873|-	10.5697	8.20362	0.366201	0.0877409	292.778
ENSMUSG00000055789	E330017A01Rik	RIKEN cDNA E330017A01 gene [Source:MGI Symbol;Acc:MGI:3045360]	chr16:58635167-58638739|-	14.8079	11.443	0.36551	0.0145014	3090.44
ENSMUSG00000021785	Ngly1	N-glycanase 1 [Source:MGI Symbol;Acc:MGI:1913276]	chr14:16249280-16311926|+	13.3327	10.3451	0.365258	0.0184014	1011.56
ENSMUSG00000096718	Zfp781	zinc finger protein 781 [Source:MGI Symbol;Acc:MGI:3696710]	chr10:81901911-81930480|-	5.90587	4.57345	0.364725	0.0142826	490.236
ENSMUSG00000079111	Kdelr2	KDEL (Lys-Asp-Glu-Leu) endoplasmic reticulum protein retention receptor 2 [Source:MGI Symbol;Acc:MGI:1914163]	chr5:143403838-143421901|+	48.6689	37.5588	0.364673	0.00980617	1399.23
ENSMUSG00000031381	Piga	phosphatidylinositol glycan anchor biosynthesis, class A [Source:MGI Symbol;Acc:MGI:99461]	chrX:164419787-164433916|+	7.82918	6.08403	0.364651	0.0140319	823.019
ENSMUSG00000102752	Gm7694	predicted gene 7694 [Source:MGI Symbol;Acc:MGI:3649135]	chr1:170298199-170306332|-	14.2648	11.0938	0.36446	0.000535	664.714
ENSMUSG00000025287	Acot9	acyl-CoA thioesterase 9 [Source:MGI Symbol;Acc:MGI:1928939]	chrX:155262443-155297654|+	7.65505	5.92082	0.364054	0.0521569	308.439
ENSMUSG00000027233	Patl2	protein associated with topoisomerase II homolog 2 (yeast) [Source:MGI Symbol;Acc:MGI:1914828]	chr2:122120108-122186189|-	7.22191	5.59104	0.363919	0.0997924	565.4
ENSMUSG00000010911	Apip	APAF1 interacting protein [Source:MGI Symbol;Acc:MGI:1926788]	chr2:103073675-103092644|+	47.2038	36.7791	0.363863	0.0662324	624.532
ENSMUSG00000046722	Cdc42se1	CDC42 small effector 1 [Source:MGI Symbol;Acc:MGI:1889510]	chr3:95228732-95236409|+	9.49649	7.36129	0.363648	0.0295408	522.078
ENSMUSG00000020346	Mgat1	mannoside acetylglucosaminyltransferase 1 [Source:MGI Symbol;Acc:MGI:96973]	chr11:49244191-49263030|+	2.40307	1.86076	0.362873	0.0331373	228.907
ENSMUSG00000037197	Rbm17	RNA binding motif protein 17 [Source:MGI Symbol;Acc:MGI:1924188]	chr2:11585437-11604153|-	70.3902	54.8503	0.362716	0.00288917	2776.73
ENSMUSG00000060450	Rnf14	ring finger protein 14 [Source:MGI Symbol;Acc:MGI:1929668]	chr18:38296635-38317847|+	45.3519	35.3199	0.362458	0.000449	2407.44
ENSMUSG00000032384	Csnk1g1	casein kinase 1, gamma 1 [Source:MGI Symbol;Acc:MGI:2660884]	chr9:65908924-66045015|+	3.99718	3.09544	0.361468	0.0480435	884.083
ENSMUSG00000005370	Msh6	mutS homolog 6 [Source:MGI Symbol;Acc:MGI:1343961]	chr17:87975050-87990883|+	73.9219	57.4719	0.361314	0.000182	4132.26
ENSMUSG00000037503	Fam168b	family with sequence similarity 168, member B [Source:MGI Symbol;Acc:MGI:2448487]	chr1:34813219-34843065|-	4.02894	3.13737	0.361296	0.0328547	444.636
ENSMUSG00000075703	Selenoi	selenoprotein I [Source:MGI Symbol;Acc:MGI:107898]	chr5:30232581-30272427|+	3.09342	2.41053	0.360855	0.004983	708.93
ENSMUSG00000022024	Sugt1	SGT1, suppressor of G2 allele of SKP1 (S. cerevisiae) [Source:MGI Symbol;Acc:MGI:1915205]	chr14:79587691-79629755|+	34.096	26.4306	0.360357	0.0320713	1456.25
ENSMUSG00000064138	Fam172a	family with sequence similarity 172, member A [Source:MGI Symbol;Acc:MGI:1915925]	chr13:77708690-78166238|+	16.7991	13.0924	0.360033	0.00333435	881.907
ENSMUSG00000032056	Btg4	B cell translocation gene 4 [Source:MGI Symbol;Acc:MGI:1860140]	chr9:51060901-51119875|+	623.146	486.991	0.359843	6.67e-06	19990.9
ENSMUSG00000041684	Bivm	basic, immunoglobulin-like variable motif containing [Source:MGI Symbol;Acc:MGI:2179809]	chr1:44118957-44144770|+	4.08018	3.17742	0.359549	0.0345171	245.514
ENSMUSG00000028967	Errfi1	ERBB receptor feedback inhibitor 1 [Source:MGI Symbol;Acc:MGI:1921405]	chr4:150853919-150868892|+	92.0638	71.8734	0.359443	1.93e-07	4123.25
ENSMUSG00000043019	Edem3	ER degradation enhancer, mannosidase alpha-like 3 [Source:MGI Symbol;Acc:MGI:1914217]	chr1:151755371-151822051|+	1.98066	1.5461	0.359148	0.0977482	584.122
ENSMUSG00000063810	Alms1	ALMS1, centrosome and basal body associated [Source:MGI Symbol;Acc:MGI:1934606]	chr6:85587531-85702753|+	7.15687	5.57214	0.358822	0.000125	3155.6
ENSMUSG00000010095	Slc3a2	solute carrier family 3 (activators of dibasic and neutral amino acid transport), member 2 [Source:MGI Symbol;Acc:MGI:96955]	chr19:8706882-8723369|-	17.7913	13.8836	0.358666	0.0118434	1411.66
ENSMUSG00000022673	Mcm4	minichromosome maintenance complex component 4 [Source:MGI Symbol;Acc:MGI:103199]	chr16:15623897-15637400|-	47.3996	36.8471	0.358551	0.000328	2722.29
ENSMUSG00000029782	Tmem209	transmembrane protein 209 [Source:MGI Symbol;Acc:MGI:1919899]	chr6:30479053-30509783|-	4.81124	3.73495	0.358393	0.0256333	1543.19
ENSMUSG00000024054	Smchd1	SMC hinge domain containing 1 [Source:MGI Symbol;Acc:MGI:1921605]	chr17:71344489-71475343|-	5.47053	4.26538	0.357608	0.000931	1894.85
ENSMUSG00000007646	Rad51c	RAD51 paralog C [Source:MGI Symbol;Acc:MGI:2150020]	chr11:87376645-87404954|-	14.8273	11.6036	0.357483	0.038827	930.545
ENSMUSG00000043872	Zmym1	zinc finger, MYM domain containing 1 [Source:MGI Symbol;Acc:MGI:1915560]	chr4:127047094-127061152|-	7.08699	5.51418	0.357398	0.0296733	432.511
ENSMUSG00000002578	Ikzf4	IKAROS family zinc finger 4 [Source:MGI Symbol;Acc:MGI:1343139]	chr10:128630843-128645991|-	28.5009	22.2654	0.357365	0.00180292	2316.8
ENSMUSG00000038848	Ythdf1	YTH domain family 1 [Source:MGI Symbol;Acc:MGI:1917431]	chr2:180904377-180920949|-	12.4788	9.69919	0.356863	0.0369104	650.382
ENSMUSG00000030265	Kras	Kirsten rat sarcoma viral oncogene homolog [Source:MGI Symbol;Acc:MGI:96680]	chr6:145216699-145250239|-	21.8361	16.9629	0.356199	0.0190998	1490.67
ENSMUSG00000051236	Msrb3	methionine sulfoxide reductase B3 [Source:MGI Symbol;Acc:MGI:2443538]	chr10:120781096-120899101|-	24.9215	19.3962	0.354029	0.040632	1634.43
ENSMUSG00000020183	Cpm	carboxypeptidase M [Source:MGI Symbol;Acc:MGI:1917824]	chr10:117629500-117687352|+	3.47845	2.71038	0.35398	0.074508	292.152
ENSMUSG00000037643	Prkci	protein kinase C, iota [Source:MGI Symbol;Acc:MGI:99260]	chr3:30995747-31052959|+	13.6495	10.6073	0.353859	0.0657746	989.986
ENSMUSG00000072889	Nfxl1	nuclear transcription factor, X-box binding-like 1 [Source:MGI Symbol;Acc:MGI:1923646]	chr5:72513301-72559684|-	35.5492	27.8141	0.35336	1.3e-05	4313.13
ENSMUSG00000030203	Dusp16	dual specificity phosphatase 16 [Source:MGI Symbol;Acc:MGI:1917936]	chr6:134715468-134792625|-	5.51801	4.32199	0.353286	0.017582	641.406
ENSMUSG00000075232	Amd1	S-adenosylmethionine decarboxylase 1 [Source:MGI Symbol;Acc:MGI:88004]	chr10:40287458-40302186|-	41.5878	32.245	0.352964	0.0457579	1873.65
ENSMUSG00000032727	Mier3	MIER family member 3 [Source:MGI Symbol;Acc:MGI:2442317]	chr13:111686178-111718596|+	19.3642	15.1608	0.352628	0.000306	1567.29
ENSMUSG00000026469	Xpr1	xenotropic and polytropic retrovirus receptor 1 [Source:MGI Symbol;Acc:MGI:97932]	chr1:155275701-155417415|-	8.50302	6.67387	0.352342	4.58e-05	2520.46
ENSMUSG00000022885	St6gal1	beta galactoside alpha 2,6 sialyltransferase 1 [Source:MGI Symbol;Acc:MGI:108470]	chr16:23224740-23360350|+	12.8583	10.0608	0.352319	0.0205925	1078.47
ENSMUSG00000074731	Zfp345	zinc finger protein 345 [Source:MGI Symbol;Acc:MGI:3652219]	chr2:150470991-150485091|-	18.4769	14.4094	0.351843	0.0521569	831.628
ENSMUSG00000024145	Pigf	phosphatidylinositol glycan anchor biosynthesis, class F [Source:MGI Symbol;Acc:MGI:99462]	chr17:86997256-87025406|-	39.4713	30.9613	0.351572	0.0083738	537.037
ENSMUSG00000000037	Scml2	sex comb on midleg-like 2 (Drosophila) [Source:MGI Symbol;Acc:MGI:1340042]	chrX:161117193-161258213|+	46.2835	36.4923	0.351317	0.0288115	4066.27
ENSMUSG00000028382	Ptbp3	polypyrimidine tract binding protein 3 [Source:MGI Symbol;Acc:MGI:1923334]	chr4:59471868-59549364|-	22.2703	17.4619	0.350976	1.78e-05	2318.49
ENSMUSG00000039242	B3galnt2	UDP-GalNAc:betaGlcNAc beta 1,3-galactosaminyltransferase, polypeptide 2 [Source:MGI Symbol;Acc:MGI:2145517]	chr13:13954469-13999103|+	8.14844	6.36168	0.350641	0.0226324	1034.75
ENSMUSG00000027074	Slc43a3	solute carrier family 43, member 3 [Source:MGI Symbol;Acc:MGI:1931054]	chr2:84936579-84958509|+	19.7779	15.5255	0.35048	6.02e-05	1424.11
ENSMUSG00000033075	Senp1	SUMO1/sentrin specific peptidase 1 [Source:MGI Symbol;Acc:MGI:2445054]	chr15:98038744-98093744|-	27.7172	21.7349	0.349953	1.28e-06	4560.17
ENSMUSG00000030105	Arl8b	ADP-ribosylation factor-like 8B [Source:MGI Symbol;Acc:MGI:1914416]	chr6:108783099-108825278|+	11.9538	9.34732	0.349415	0.00955185	1796.9
ENSMUSG00000025577	Cbx2	chromobox 2 [Source:MGI Symbol;Acc:MGI:88289]	chr11:119022962-119031270|+	43.4137	34.1129	0.349395	4.18e-05	2621.25
ENSMUSG00000043929	Klhl15	kelch-like 15 [Source:MGI Symbol;Acc:MGI:1923400]	chrX:94234599-94277724|+	5.73345	4.48281	0.349131	0.0298186	801.412
ENSMUSG00000058446	Znrf2	zinc and ring finger 2 [Source:MGI Symbol;Acc:MGI:1196246]	chr6:54816916-54893500|+	37.1832	29.2369	0.348904	0.000118	4246
ENSMUSG00000058290	Espl1	extra spindle pole bodies 1, separase [Source:MGI Symbol;Acc:MGI:2146156]	chr15:102296293-102324356|+	15.7687	12.3432	0.348822	0.00224796	2321.66
ENSMUSG00000063480	Snu13	SNU13 homolog, small nuclear ribonucleoprotein (U4/U6.U5) [Source:MGI Symbol;Acc:MGI:893586]	chr15:82041319-82047598|-	40.3202	31.5453	0.348431	0.0141701	1251.09
ENSMUSG00000032218	Ccnb2	cyclin B2 [Source:MGI Symbol;Acc:MGI:88311]	chr9:70407692-70421547|-	59.9536	46.9119	0.348086	0.0127171	1305.47
ENSMUSG00000051285	Pcmtd1	protein-L-isoaspartate (D-aspartate) O-methyltransferase domain containing 1 [Source:MGI Symbol;Acc:MGI:2441773]	chr1:7088920-7173628|+	4.99079	3.91321	0.347865	0.0752043	459.684
ENSMUSG00000020283	Pex13	peroxisomal biogenesis factor 13 [Source:MGI Symbol;Acc:MGI:1919379]	chr11:23646479-23665959|-	32.8832	25.697	0.347039	0.00501361	2071.17
ENSMUSG00000022023	Wbp4	WW domain binding protein 4 [Source:MGI Symbol;Acc:MGI:109568]	chr14:79459937-79481268|-	6.16355	4.83064	0.346701	0.032775	359.566
ENSMUSG00000037533	Rapgef6	Rap guanine nucleotide exchange factor (GEF) 6 [Source:MGI Symbol;Acc:MGI:2384761]	chr11:54522847-54699285|+	6.70492	5.27065	0.346615	0.000797	1537.14
ENSMUSG00000053870	Fpgt	fucose-1-phosphate guanylyltransferase [Source:MGI Symbol;Acc:MGI:1922790]	chr3:155084918-155093403|-	12.3708	9.70812	0.346456	0.00171621	1036.61
ENSMUSG00000035529	Prdm4	PR domain containing 4 [Source:MGI Symbol;Acc:MGI:1920093]	chr10:85891966-85917142|-	15.7679	12.3925	0.34644	0.00596068	1252.61
ENSMUSG00000024539	Ptpn2	protein tyrosine phosphatase, non-receptor type 2 [Source:MGI Symbol;Acc:MGI:97806]	chr18:67665511-67724595|-	32.1121	25.2461	0.345734	0.00689855	1525.86
ENSMUSG00000030201	Lrp6	low density lipoprotein receptor-related protein 6 [Source:MGI Symbol;Acc:MGI:1298218]	chr6:134446476-134566965|-	37.6136	29.7415	0.344478	0.00034	8535.17
ENSMUSG00000034349	Smc4	structural maintenance of chromosomes 4 [Source:MGI Symbol;Acc:MGI:1917349]	chr3:69004738-69034623|+	85.0898	66.8425	0.344109	0.0722676	17573.6
ENSMUSG00000037808	Fam76b	family with sequence similarity 76, member B [Source:MGI Symbol;Acc:MGI:1920076]	chr9:13827716-13854987|+	5.60155	4.41868	0.343201	0.0621327	360.422
ENSMUSG00000015733	Capza2	capping protein (actin filament) muscle Z-line, alpha 2 [Source:MGI Symbol;Acc:MGI:106222]	chr6:17636234-17666972|+	10.9085	8.59307	0.342931	0.0200714	848.651
ENSMUSG00000021236	Entpd5	ectonucleoside triphosphate diphosphohydrolase 5 [Source:MGI Symbol;Acc:MGI:1321385]	chr12:84373857-84409029|-	4.89248	3.85027	0.342832	0.0199434	484.112
ENSMUSG00000020423	Btg2	B cell translocation gene 2, anti-proliferative [Source:MGI Symbol;Acc:MGI:108384]	chr1:134075170-134079120|-	4.18899	3.30055	0.342746	0.089699	182.058
ENSMUSG00000002297	Dbf4	DBF4 zinc finger [Source:MGI Symbol;Acc:MGI:1351328]	chr5:8396973-8422716|-	39.4452	30.9452	0.342436	0.00296767	4292.65
ENSMUSG00000020098	Pcbd1	pterin 4 alpha carbinolamine dehydratase/dimerization cofactor of hepatocyte nuclear factor 1 alpha (TCF1) 1 [Source:MGI Symbol;Acc:MGI:94873]	chr10:61089331-61094324|+	22.1992	17.5247	0.342024	0.0745628	288.835
ENSMUSG00000039994	Timeless	timeless circadian clock 1 [Source:MGI Symbol;Acc:MGI:1321393]	chr10:128232065-128252941|+	13.2702	10.5223	0.341902	0.0403679	1492.21
ENSMUSG00000028412	Slc44a1	solute carrier family 44, member 1 [Source:MGI Symbol;Acc:MGI:2140592]	chr4:53440413-53622478|+	2.51329	1.97457	0.341871	0.0710904	1178.26
ENSMUSG00000098134	Rnf113a2	ring finger protein 113A2 [Source:MGI Symbol;Acc:MGI:1913631]	chr12:84417196-84418578|+	37.9213	30.0645	0.341476	0.0193502	772.266
ENSMUSG00000039384	Dusp10	dual specificity phosphatase 10 [Source:MGI Symbol;Acc:MGI:1927070]	chr1:184013302-184075636|+	15.9747	12.6171	0.341394	0.0552432	719.061
ENSMUSG00000037443	Cep85	centrosomal protein 85 [Source:MGI Symbol;Acc:MGI:1917262]	chr4:134129858-134187112|-	8.39284	6.63064	0.341365	0.00160951	757.859
ENSMUSG00000027665	Pik3ca	phosphatidylinositol 3-kinase, catalytic, alpha polypeptide [Source:MGI Symbol;Acc:MGI:1206581]	chr3:32397671-32468486|+	9.14181	7.19808	0.340987	0.00316757	1336.57
ENSMUSG00000038267	Slc22a23	solute carrier family 22, member 23 [Source:MGI Symbol;Acc:MGI:1920352]	chr13:34179158-34345182|-	9.37403	7.41863	0.339715	0.000503	1292.29
ENSMUSG00000020717	Pecam1	platelet/endothelial cell adhesion molecule 1 [Source:MGI Symbol;Acc:MGI:97537]	chr11:106654217-106750628|-	7.80314	6.19714	0.338641	0.027106	977.159
ENSMUSG00000001156	Mxd1	MAX dimerization protein 1 [Source:MGI Symbol;Acc:MGI:96908]	chr6:86647042-86669161|-	18.1848	14.2922	0.338516	0.0120153	2941.45
ENSMUSG00000042757	Tmem108	transmembrane protein 108 [Source:MGI Symbol;Acc:MGI:1932411]	chr9:103482947-103761837|-	9.21298	7.28804	0.338314	0.0337216	1464.72
ENSMUSG00000043090	Zfp866	zinc finger protein 866 [Source:MGI Symbol;Acc:MGI:3584369]	chr8:69761326-69791178|-	5.77577	4.56854	0.338086	0.0116642	599.417
ENSMUSG00000026812	Tsc1	tuberous sclerosis 1 [Source:MGI Symbol;Acc:MGI:1929183]	chr2:28641228-28691167|+	7.68566	6.0893	0.33807	0.0102455	1577.44
ENSMUSG00000024097	Srsf7	serine/arginine-rich splicing factor 7 [Source:MGI Symbol;Acc:MGI:1926232]	chr17:80200089-80207305|-	13.7493	10.8726	0.337926	0.0133137	496.321
ENSMUSG00000036513	Commd2	COMM domain containing 2 [Source:MGI Symbol;Acc:MGI:1098806]	chr3:57644349-57651715|-	23.1656	18.4268	0.337767	0.0180842	1015.78
ENSMUSG00000013584	Aldh1a2	aldehyde dehydrogenase family 1, subfamily A2 [Source:MGI Symbol;Acc:MGI:107928]	chr9:71215789-71296243|+	44.9838	35.6059	0.337299	0.0229275	1598.1
ENSMUSG00000040331	Nsmce4a	NSE4 homolog A, SMC5-SMC6 complex component [Source:MGI Symbol;Acc:MGI:1915122]	chr7:130532526-130573118|-	9.54278	7.51572	0.33726	0.0513214	573.123
ENSMUSG00000027014	Cwc22	CWC22 spliceosome-associated protein [Source:MGI Symbol;Acc:MGI:2136773]	chr2:77881159-77946375|-	15.5115	12.3053	0.336617	0.00352656	1971.87
ENSMUSG00000056493	Foxk1	forkhead box K1 [Source:MGI Symbol;Acc:MGI:1347488]	chr5:142401497-142462011|+	26.5622	21.1203	0.336447	0.0118108	3512.91
ENSMUSG00000048047	Zbtb33	zinc finger and BTB domain containing 33 [Source:MGI Symbol;Acc:MGI:1927290]	chrX:38189793-38197046|+	10.074	7.97643	0.336367	0.0185188	753.054
ENSMUSG00000030543	Mesp2	mesoderm posterior 2 [Source:MGI Symbol;Acc:MGI:1096325]	chr7:79810727-79813439|+	46.7564	37.082	0.336284	0.0104499	1414.28
ENSMUSG00000027699	Ect2	ect2 oncogene [Source:MGI Symbol;Acc:MGI:95281]	chr3:27097222-27153878|-	28.1663	22.2403	0.335899	0.0045248	2178.03
ENSMUSG00000033793	Atp6v1h	ATPase, H+ transporting, lysosomal V1 subunit H [Source:MGI Symbol;Acc:MGI:1914864]	chr1:5070018-5162529|+	4.01926	3.17476	0.335208	0.0241313	614.131
ENSMUSG00000045751	Mms22l	MMS22-like, DNA repair protein [Source:MGI Symbol;Acc:MGI:2684980]	chr4:24496451-24602950|+	4.49191	3.53945	0.334369	0.0682092	569.551
ENSMUSG00000039131	Gipc2	GIPC PDZ domain containing family, member 2 [Source:MGI Symbol;Acc:MGI:1889209]	chr3:152093533-152166230|-	6.00372	4.7569	0.333524	0.0781783	308.125
ENSMUSG00000042348	Arl15	ADP-ribosylation factor-like 15 [Source:MGI Symbol;Acc:MGI:2442308]	chr13:113794505-114157461|+	18.4925	14.6906	0.333044	0.00831316	921.071
ENSMUSG00000020459	Mtif2	mitochondrial translational initiation factor 2 [Source:MGI Symbol;Acc:MGI:1924034]	chr11:29526408-29545279|+	4.02928	3.19069	0.33241	0.0760759	230.954
ENSMUSG00000039458	Mtmr12	myotubularin related protein 12 [Source:MGI Symbol;Acc:MGI:2443034]	chr15:12205028-12272240|+	3.47687	2.74866	0.332316	0.0772619	267.247
ENSMUSG00000021770	Samd8	sterile alpha motif domain containing 8 [Source:MGI Symbol;Acc:MGI:1914880]	chr14:21750531-21798725|+	2.82329	2.23817	0.332056	0.0651806	800.626
ENSMUSG00000047030	Spata2	spermatogenesis associated 2 [Source:MGI Symbol;Acc:MGI:2146885]	chr2:167481133-167492887|-	13.5758	10.809	0.331132	0.00827572	1054.92
ENSMUSG00000010914	Pdhx	pyruvate dehydrogenase complex, component X [Source:MGI Symbol;Acc:MGI:1351627]	chr2:103021075-103073513|-	25.4601	20.2459	0.330848	0.000887	1698.06
ENSMUSG00000069041	Slc25a31	solute carrier family 25 (mitochondrial carrier; adenine nucleotide translocator), member 31 [Source:MGI Symbol;Acc:MGI:1920583]	chr3:40708855-40726096|+	12.6097	10.0069	0.330246	0.0332116	545.871
ENSMUSG00000027340	Slc23a2	solute carrier family 23 (nucleobase transporters), member 2 [Source:MGI Symbol;Acc:MGI:1859682]	chr2:132052496-132145108|-	20.4235	16.2439	0.329596	0.0044726	8474.62
ENSMUSG00000027583	Zbtb46	zinc finger and BTB domain containing 46 [Source:MGI Symbol;Acc:MGI:1919397]	chr2:181387762-181459426|-	16.1814	12.9014	0.328977	2.77e-05	1909.35
ENSMUSG00000059811	Atl2	atlastin GTPase 2 [Source:MGI Symbol;Acc:MGI:1929492]	chr17:79848390-79896123|-	33.729	26.733	0.328677	0.00726345	5204.95
ENSMUSG00000038910	Plcl2	phospholipase C-like 2 [Source:MGI Symbol;Acc:MGI:1352756]	chr17:50509547-50688493|+	3.40262	2.70038	0.328527	0.0976231	176.319
ENSMUSG00000030096	Slc6a6	solute carrier family 6 (neurotransmitter transporter, taurine), member 6 [Source:MGI Symbol;Acc:MGI:98488]	chr6:91684053-91759066|+	17.3044	13.7735	0.327714	0.00258061	2963.64
ENSMUSG00000078497	Zfp978	zinc finger protein 978 [Source:MGI Symbol;Acc:MGI:3701123]	chr4:147361303-147391004|+	53.7194	42.8104	0.327046	0.00781206	870.366
ENSMUSG00000047694	Yipf6	Yip1 domain family, member 6 [Source:MGI Symbol;Acc:MGI:1925179]	chrX:98936316-98949017|+	32.8218	26.0616	0.326419	0.00513288	4761.48
ENSMUSG00000024764	Naa40	N(alpha)-acetyltransferase 40, NatD catalytic subunit [Source:MGI Symbol;Acc:MGI:1918249]	chr19:7225668-7241222|-	22.2392	17.7642	0.326042	0.0571037	1233.68
ENSMUSG00000004591	Pkn2	protein kinase N2 [Source:MGI Symbol;Acc:MGI:109211]	chr3:142790902-142882004|-	18.9388	15.0732	0.325364	0.0167937	3389.96
ENSMUSG00000038497	Tmco3	transmembrane and coiled-coil domains 3 [Source:MGI Symbol;Acc:MGI:2444946]	chr8:13288190-13322924|+	3.63576	2.90066	0.325015	0.0137065	490.556
ENSMUSG00000020151	Ptprr	protein tyrosine phosphatase, receptor type, R [Source:MGI Symbol;Acc:MGI:109559]	chr10:116018213-116274932|+	19.9212	15.9463	0.323321	6.15e-05	1513.6
ENSMUSG00000069910	Spdl1	spindle apparatus coiled-coil protein 1 [Source:MGI Symbol;Acc:MGI:1917635]	chr11:34809190-34833641|-	63.1231	50.6527	0.323145	0.00297597	3648.8
ENSMUSG00000025105	Bnc1	basonuclin 1 [Source:MGI Symbol;Acc:MGI:1097164]	chr7:81966672-81992292|-	41.1021	32.8435	0.322882	2.14e-05	3288.61
ENSMUSG00000032913	Lrig2	leucine-rich repeats and immunoglobulin-like domains 2 [Source:MGI Symbol;Acc:MGI:2443718]	chr3:104396418-104511918|-	2.65528	2.11696	0.322782	0.0346674	1392.84
ENSMUSG00000002222	Rmnd5a	required for meiotic nuclear division 5 homolog A [Source:MGI Symbol;Acc:MGI:1915727]	chr6:71388634-71440637|-	42.7682	34.2321	0.321797	0.000421	3520.93
ENSMUSG00000022652	Morc1	microrchidia 1 [Source:MGI Symbol;Acc:MGI:1316740]	chr16:48431237-48630905|+	11.8465	9.49283	0.321368	0.0476084	575.385
ENSMUSG00000022707	Gbe1	glucan (1,4-alpha-), branching enzyme 1 [Source:MGI Symbol;Acc:MGI:1921435]	chr16:70313949-70569716|+	4.09294	3.27198	0.320997	0.0418713	328.063
ENSMUSG00000024056	Ndc80	NDC80 kinetochore complex component [Source:MGI Symbol;Acc:MGI:1914302]	chr17:71496100-71526857|-	55.6313	44.4551	0.320736	0.0130287	1972.72
ENSMUSG00000029461	Fam168a	family with sequence similarity 168, member A [Source:MGI Symbol;Acc:MGI:2442372]	chr7:100706635-100841656|+	18.3276	14.7212	0.319805	0.00067	2147.26
ENSMUSG00000044792	Isca1	iron-sulfur cluster assembly 1 [Source:MGI Symbol;Acc:MGI:1916296]	chr13:59755409-59769810|-	8.7656	7.04157	0.319506	0.030207	1103.14
ENSMUSG00000013878	Rnf170	ring finger protein 170 [Source:MGI Symbol;Acc:MGI:1924983]	chr8:26119368-26151790|+	15.5527	12.4236	0.318856	0.00541676	1704.88
ENSMUSG00000020864	Ankrd40	ankyrin repeat domain 40 [Source:MGI Symbol;Acc:MGI:1918702]	chr11:94328001-94341841|+	15.1657	12.1668	0.318045	0.00132261	943.226
ENSMUSG00000023830	Igf2r	insulin-like growth factor 2 receptor [Source:MGI Symbol;Acc:MGI:96435]	chr17:12682406-12769664|-	2.01978	1.61773	0.317163	0.0868778	1253.4
ENSMUSG00000040464	Gtpbp10	GTP-binding protein 10 (putative) [Source:MGI Symbol;Acc:MGI:2385599]	chr5:5537454-5559538|-	11.5009	9.26804	0.317086	0.0208517	1195.05
ENSMUSG00000052551	Adarb2	adenosine deaminase, RNA-specific, B2 [Source:MGI Symbol;Acc:MGI:2151118]	chr13:8202866-8768747|+	4.25185	3.40269	0.317073	0.0840638	731.769
ENSMUSG00000066415	Msl2	male-specific lethal 2 homolog (Drosophila) [Source:MGI Symbol;Acc:MGI:1925103]	chr9:101074101-101104800|+	21.4146	17.1658	0.316641	0.00176623	1765.25
ENSMUSG00000041491	Cep78	centrosomal protein 78 [Source:MGI Symbol;Acc:MGI:1924386]	chr19:15955774-15984989|-	9.46812	7.62172	0.316569	0.0249295	414.538
ENSMUSG00000038806	Sde2	SDE2 telomere maintenance homolog (S. pombe) [Source:MGI Symbol;Acc:MGI:2384788]	chr1:180851127-180868113|+	5.78416	4.64288	0.316199	0.0711597	231.651
ENSMUSG00000057534	Elobl	elongin B-like [Source:MGI Symbol;Acc:MGI:1860403]	chr11:88964658-88966931|-	1763.02	1405.49	0.316097	0.0164703	51925
ENSMUSG00000058076	Sdhc	succinate dehydrogenase complex, subunit C, integral membrane protein [Source:MGI Symbol;Acc:MGI:1913302]	chr1:171127165-171150603|-	8.35298	6.67986	0.315828	0.0589744	513.275
ENSMUSG00000020585	Laptm4a	lysosomal-associated protein transmembrane 4A [Source:MGI Symbol;Acc:MGI:108017]	chr12:8921664-8938742|+	30.1873	24.1834	0.315106	0.0301935	838.14
ENSMUSG00000060166	Zdhhc8	zinc finger, DHHC domain containing 8 [Source:MGI Symbol;Acc:MGI:1338012]	chr16:18220754-18235136|-	22.8246	18.4414	0.314907	0.00990095	2042.21
ENSMUSG00000020840	Blmh	bleomycin hydrolase [Source:MGI Symbol;Acc:MGI:1345186]	chr11:76924809-76987379|+	12.7023	10.1626	0.314529	0.0535647	1095.26
ENSMUSG00000008333	Snrpb2	U2 small nuclear ribonucleoprotein B [Source:MGI Symbol;Acc:MGI:104805]	chr2:143063039-143072853|+	45.1321	36.3137	0.313693	0.000335	1628.67
ENSMUSG00000040383	Aqr	aquarius [Source:MGI Symbol;Acc:MGI:1276102]	chr2:114101170-114187024|-	4.8385	3.88517	0.313632	0.0180791	866.775
ENSMUSG00000035107	Dcbld2	discoidin, CUB and LCCL domain containing 2 [Source:MGI Symbol;Acc:MGI:1920629]	chr16:58408443-58469727|+	7.66531	6.12983	0.31297	0.024984	2296.73
ENSMUSG00000010721	Lmbr1	limb region 1 [Source:MGI Symbol;Acc:MGI:1861746]	chr5:29229802-29378390|-	11.5359	9.30343	0.312704	0.0376247	1225.31
ENSMUSG00000090112	Shprh	SNF2 histone linker PHD RING helicase [Source:MGI Symbol;Acc:MGI:1917581]	chr10:11149427-11217595|+	6.72674	5.4018	0.312434	0.00345357	1591.41
ENSMUSG00000021782	Dlg5	discs, large homolog 5 (Drosophila) [Source:MGI Symbol;Acc:MGI:1918478]	chr14:24133953-24245920|-	13.178	10.6318	0.312255	0.00183405	2091.9
ENSMUSG00000068823	Csde1	cold shock domain containing E1, RNA binding [Source:MGI Symbol;Acc:MGI:92356]	chr3:103020426-103058186|+	84.96	68.5831	0.31212	1.91e-05	12460.6
ENSMUSG00000049800	Sertad2	SERTA domain containing 2 [Source:MGI Symbol;Acc:MGI:1931026]	chr11:20543253-20653021|+	3.89665	3.14253	0.311877	0.0614115	311.298
ENSMUSG00000020680	Taf15	TATA-box binding protein associated factor 15 [Source:MGI Symbol;Acc:MGI:1917689]	chr11:83473086-83506743|+	15.0305	12.1226	0.311816	0.0266085	610.295
ENSMUSG00000035394	Cfap53	cilia and flagella associated protein 53 [Source:MGI Symbol;Acc:MGI:1921703]	chr18:74283090-74359986|+	18.6682	15.059	0.310458	0.0714995	687.556
ENSMUSG00000045103	Dmd	dystrophin, muscular dystrophy [Source:MGI Symbol;Acc:MGI:94909]	chrX:82948870-85206141|+	2.21656	1.79181	0.310241	0.0409683	702.957
ENSMUSG00000039159	Ube2h	ubiquitin-conjugating enzyme E2H [Source:MGI Symbol;Acc:MGI:104632]	chr6:30211289-30304539|-	22.5044	18.0986	0.307849	0.0176416	4144.49
ENSMUSG00000018334	Ksr1	kinase suppressor of ras 1 [Source:MGI Symbol;Acc:MGI:105051]	chr11:79013440-79146407|-	3.59356	2.90104	0.307407	0.0537417	466.381
ENSMUSG00000078970	Wdr92	WD repeat domain 92 [Source:MGI Symbol;Acc:MGI:2144224]	chr11:17182107-17233796|+	16.6879	13.4959	0.306119	0.0337216	561.492
ENSMUSG00000035351	Nup37	nucleoporin 37 [Source:MGI Symbol;Acc:MGI:1919964]	chr10:88146992-88178390|+	17.9279	14.5092	0.305371	0.00946672	775.231
ENSMUSG00000060475	Wtap	Wilms tumour 1-associating protein [Source:MGI Symbol;Acc:MGI:1926395]	chr17:12966796-12992546|-	32.1668	25.8211	0.305315	0.047832	2049.74
ENSMUSG00000102030	Gm29106	predicted gene 29106 [Source:MGI Symbol;Acc:MGI:5579812]	chr1:118176542-118202307|+	10.4673	8.45284	0.305193	0.0575178	530.45
ENSMUSG00000029767	Calu	calumenin [Source:MGI Symbol;Acc:MGI:1097158]	chr6:29348069-29377110|+	15.0247	12.1314	0.305145	0.0721602	1611.06
ENSMUSG00000039000	Ube3c	ubiquitin protein ligase E3C [Source:MGI Symbol;Acc:MGI:2140998]	chr5:29569242-29676092|+	7.17604	5.80653	0.304839	0.00159785	1000.52
ENSMUSG00000026634	Angel2	angel homolog 2 [Source:MGI Symbol;Acc:MGI:1196310]	chr1:190925112-190946962|+	93.9501	76.12	0.304142	6.3e-06	6357.26
ENSMUSG00000025332	Kdm5c	lysine (K)-specific demethylase 5C [Source:MGI Symbol;Acc:MGI:99781]	chrX:152233020-152274535|+	7.76042	6.29596	0.304095	0.00877583	758.419
ENSMUSG00000040250	Ints13	integrator complex subunit 13 [Source:MGI Symbol;Acc:MGI:1918427]	chr6:146549632-146577835|-	7.28569	5.9138	0.303102	0.00733155	777.652
ENSMUSG00000047248	C2cd3	C2 calcium-dependent domain containing 3 [Source:MGI Symbol;Acc:MGI:2142166]	chr7:100372233-100470152|+	13.5758	11.0371	0.302545	0.00922626	2512.98
ENSMUSG00000027276	Jag1	jagged 1 [Source:MGI Symbol;Acc:MGI:1095416]	chr2:137081456-137116644|-	26.6017	21.5357	0.30247	0.0153808	7766.77
ENSMUSG00000027201	Myef2	myelin basic protein expression factor 2, repressor [Source:MGI Symbol;Acc:MGI:104592]	chr2:125084628-125123661|-	9.35619	7.61318	0.302416	0.0500802	756.236
ENSMUSG00000039163	Cmc1	COX assembly mitochondrial protein 1 [Source:MGI Symbol;Acc:MGI:1915149]	chr9:118064522-118150177|-	16.7933	13.6227	0.301345	0.080341	307.155
ENSMUSG00000014850	Msh3	mutS homolog 3 [Source:MGI Symbol;Acc:MGI:109519]	chr13:92211872-92355003|-	8.62264	7.01549	0.301126	0.000479	1582.72
ENSMUSG00000031441	Atp11a	ATPase, class VI, type 11A [Source:MGI Symbol;Acc:MGI:1354735]	chr8:12757014-12868728|+	11.3391	9.17556	0.301121	0.01767	2443.72
ENSMUSG00000038542	Pcid2	PCI domain containing 2 [Source:MGI Symbol;Acc:MGI:2443003]	chr8:13077189-13105459|-	16.5215	13.3751	0.300916	0.0529694	623.36
ENSMUSG00000035614	Fam179b	family with sequence similarity 179, member B [Source:MGI Symbol;Acc:MGI:2684313]	chr12:64965804-65022573|+	18.8349	15.2439	0.299456	0.00957767	3305.39
ENSMUSG00000001630	Stk38l	serine/threonine kinase 38 like [Source:MGI Symbol;Acc:MGI:1922250]	chr6:146724995-146778812|+	7.82879	6.36993	0.299223	0.0466408	731.362
ENSMUSG00000022241	Tars	threonyl-tRNA synthetase [Source:MGI Symbol;Acc:MGI:106314]	chr15:11383663-11399658|-	14.6632	11.9117	0.298684	0.0489435	575.127
ENSMUSG00000005103	Wdr1	WD repeat domain 1 [Source:MGI Symbol;Acc:MGI:1337100]	chr5:38526813-38563221|-	6.90679	5.5985	0.298213	0.0430482	797.002
ENSMUSG00000026039	Sgol2a	shugoshin-like 2a (S. pombe) [Source:MGI Symbol;Acc:MGI:1098767]	chr1:57995971-58025899|+	5.18645	4.2125	0.298033	0.0449988	572.497
ENSMUSG00000067367	Lyar	Ly1 antibody reactive clone [Source:MGI Symbol;Acc:MGI:107470]	chr5:38220470-38234306|+	33.8456	27.6293	0.297847	0.0787987	1508.19
ENSMUSG00000022014	Epsti1	epithelial stromal interaction 1 (breast) [Source:MGI Symbol;Acc:MGI:1915168]	chr14:77904239-78002656|+	24.2036	19.7585	0.297203	0.00932052	982.423
ENSMUSG00000053559	Smagp	small cell adhesion glycoprotein [Source:MGI Symbol;Acc:MGI:2448476]	chr15:100621342-100636865|-	154.728	126.465	0.297156	0.0997924	3395.7
ENSMUSG00000030306	Tmtc1	transmembrane and tetratricopeptide repeat containing 1 [Source:MGI Symbol;Acc:MGI:3039590]	chr6:148232430-148444389|-	65.7901	53.3995	0.297052	0.00750044	9252.58
ENSMUSG00000029287	Tgfbr3	transforming growth factor, beta receptor III [Source:MGI Symbol;Acc:MGI:104637]	chr5:107106570-107289629|-	12.2057	9.93521	0.297041	0.0604417	1233.69
ENSMUSG00000028640	Tfap2c	transcription factor AP-2, gamma [Source:MGI Symbol;Acc:MGI:106032]	chr2:172549593-172558622|+	14.5767	11.8702	0.296148	0.0841906	716.935
ENSMUSG00000070677	D5Ertd577e	DNA segment, Chr 5, ERATO Doi 577, expressed [Source:MGI Symbol;Acc:MGI:1261918]	chr5:95456806-95485587|+	206.876	169.431	0.295935	0.000516	8466.05
ENSMUSG00000036893	Ehmt1	euchromatic histone methyltransferase 1 [Source:MGI Symbol;Acc:MGI:1924933]	chr2:24789928-24919614|-	6.40696	5.2116	0.295651	0.0224248	750.09
ENSMUSG00000020076	Ddx50	DEAD (Asp-Glu-Ala-Asp) box polypeptide 50 [Source:MGI Symbol;Acc:MGI:2182303]	chr10:62615895-62651218|-	2.11145	1.72061	0.295428	0.0942169	477.537
ENSMUSG00000066735	Vkorc1l1	vitamin K epoxide reductase complex, subunit 1-like 1 [Source:MGI Symbol;Acc:MGI:1916818]	chr5:129941970-129986692|+	3.13096	2.54808	0.295053	0.0886926	458.279
ENSMUSG00000037536	Fbxo34	F-box protein 34 [Source:MGI Symbol;Acc:MGI:1926188]	chr14:47472561-47531962|+	98.8781	80.4906	0.294589	0.00267574	5707.01
ENSMUSG00000028035	Dnajb4	DnaJ heat shock protein family (Hsp40) member B4 [Source:MGI Symbol;Acc:MGI:1914285]	chr3:152178511-152210302|-	87.3634	71.0915	0.293418	0.0252265	9595.27
ENSMUSG00000023963	Cyp39a1	cytochrome P450, family 39, subfamily a, polypeptide 1 [Source:MGI Symbol;Acc:MGI:1927096]	chr17:43667425-43751431|+	14.0083	11.4366	0.293139	0.0497858	582.895
ENSMUSG00000018848	Rars	arginyl-tRNA synthetase [Source:MGI Symbol;Acc:MGI:1914297]	chr11:35808381-35834506|-	24.1811	19.7278	0.292868	0.0195977	1796.25
ENSMUSG00000001173	Ocrl	OCRL, inositol polyphosphate-5-phosphatase [Source:MGI Symbol;Acc:MGI:109589]	chrX:47912387-47965868|+	5.72408	4.67525	0.292772	0.0159747	782.184
ENSMUSG00000026082	Rev1	REV1, DNA directed polymerase [Source:MGI Symbol;Acc:MGI:1929074]	chr1:38052786-38129801|-	8.93431	7.27277	0.292584	0.0503374	818.717
ENSMUSG00000091512	Lamtor3	late endosomal/lysosomal adaptor, MAPK and MTOR activator 3 [Source:MGI Symbol;Acc:MGI:1929467]	chr3:137918506-137928900|+	9.59096	7.8165	0.292465	0.0574634	1305.18
ENSMUSG00000032570	Atp2c1	ATPase, Ca++-sequestering [Source:MGI Symbol;Acc:MGI:1889008]	chr9:105403539-105527319|-	31.3028	25.537	0.291847	0.000532	6176.37
ENSMUSG00000010277	2610507B11Rik	RIKEN cDNA 2610507B11 gene [Source:MGI Symbol;Acc:MGI:1919753]	chr11:78261752-78290623|+	7.99077	6.54385	0.291755	0.00552055	1274.23
ENSMUSG00000052593	Adam17	a disintegrin and metallopeptidase domain 17 [Source:MGI Symbol;Acc:MGI:1096335]	chr12:21323509-21373632|-	16.7548	13.6984	0.291497	0.0228537	3310.13
ENSMUSG00000063550	Nup98	nucleoporin 98 [Source:MGI Symbol;Acc:MGI:109404]	chr7:102119398-102210176|-	64.7383	52.8327	0.291218	0.00016	12655.4
ENSMUSG00000051527	Usp29	ubiquitin specific peptidase 29 [Source:MGI Symbol;Acc:MGI:1888998]	chr7:6730578-6967219|+	2.1532	1.76321	0.291183	0.0978842	597.715
ENSMUSG00000028676	Srsf10	serine/arginine-rich splicing factor 10 [Source:MGI Symbol;Acc:MGI:1333805]	chr4:135855747-135869908|+	19.0056	15.4867	0.290189	0.0157877	1943.74
ENSMUSG00000007989	Fzd3	frizzled class receptor 3 [Source:MGI Symbol;Acc:MGI:108476]	chr14:65201026-65262463|-	5.32424	4.35959	0.289771	0.0340501	547.194
ENSMUSG00000029098	Acox3	acyl-Coenzyme A oxidase 3, pristanoyl [Source:MGI Symbol;Acc:MGI:1933156]	chr5:35583040-35615352|+	5.50529	4.48893	0.289653	0.0398616	1223.16
ENSMUSG00000040843	Tiprl	TIP41, TOR signalling pathway regulator-like (S. cerevisiae) [Source:MGI Symbol;Acc:MGI:1915087]	chr1:165212286-165236996|-	9.34889	7.6366	0.289616	0.0290833	724.368
ENSMUSG00000031010	Usp9x	ubiquitin specific peptidase 9, X chromosome [Source:MGI Symbol;Acc:MGI:894681]	chrX:13071498-13173328|+	144.314	117.66	0.289311	0.00344174	43678.4
ENSMUSG00000024974	Smc3	structural maintenance of chromosomes 3 [Source:MGI Symbol;Acc:MGI:1339795]	chr19:53600398-53645833|+	14.363	11.6848	0.28904	0.0377	5984.78
ENSMUSG00000020361	Hspa4	heat shock protein 4 [Source:MGI Symbol;Acc:MGI:1342292]	chr11:53259814-53300457|-	26.0977	21.3746	0.288825	0.0195542	4788.18
ENSMUSG00000034533	Scn10a	sodium channel, voltage-gated, type X, alpha [Source:MGI Symbol;Acc:MGI:108029]	chr9:119608456-119719322|-	9.57854	7.81168	0.288626	0.0304723	1379.06
ENSMUSG00000069114	Zbtb10	zinc finger and BTB domain containing 10 [Source:MGI Symbol;Acc:MGI:2139883]	chr3:9250602-9285333|+	21.065	17.2735	0.288244	0.00415242	2420.68
ENSMUSG00000050144	Slc25a44	solute carrier family 25, member 44 [Source:MGI Symbol;Acc:MGI:2444391]	chr3:88410498-88425139|-	10.1828	8.32695	0.287804	0.0741422	544.622
ENSMUSG00000053192	Mllt11	myeloid/lymphoid or mixed-lineage leukemia; translocated to, 11 [Source:MGI Symbol;Acc:MGI:1929671]	chr3:95219135-95232171|-	17.7424	14.5884	0.287747	0.0770025	530.416
ENSMUSG00000039987	Phtf2	putative homeodomain transcription factor 2 [Source:MGI Symbol;Acc:MGI:1916020]	chr5:20758663-20882124|-	37.5724	30.7107	0.287451	0.00462977	4369.3
ENSMUSG00000041740	Rnf10	ring finger protein 10 [Source:MGI Symbol;Acc:MGI:1859162]	chr5:115241412-115272898|-	8.72772	7.12821	0.287425	0.0343665	787.921
ENSMUSG00000025198	Erlin1	ER lipid raft associated 1 [Source:MGI Symbol;Acc:MGI:2387613]	chr19:44034944-44069785|-	5.17981	4.25208	0.287262	0.0559296	647.918
ENSMUSG00000047466	8030462N17Rik	RIKEN cDNA 8030462N17 gene [Source:MGI Symbol;Acc:MGI:2444951]	chr18:77633281-77714010|-	26.9335	22.1009	0.286957	0.0355243	1419.16
ENSMUSG00000025979	Mob4	MOB family member 4, phocein [Source:MGI Symbol;Acc:MGI:104899]	chr1:55131231-55154899|+	6.81787	5.59125	0.285801	0.0585984	421.213
ENSMUSG00000032309	Fbxo22	F-box protein 22 [Source:MGI Symbol;Acc:MGI:1926014]	chr9:55208925-55224433|+	6.8269	5.59954	0.285723	0.0718454	254.071
ENSMUSG00000050810	Oog3	oogenesin 3 [Source:MGI Symbol;Acc:MGI:2684047]	chr4:144157557-144162663|-	498.163	409.175	0.285233	0.000229	11882.8
ENSMUSG00000058587	Tmod3	tropomodulin 3 [Source:MGI Symbol;Acc:MGI:1355315]	chr9:75497707-75559657|-	3.86512	3.17386	0.285031	0.0451981	684.216
ENSMUSG00000079424	Gm3259	predicted gene 3259 [Source:MGI Symbol;Acc:MGI:3781437]	chr5:95305911-95343917|+	245.692	200.849	0.284999	0.0404989	9679.41
ENSMUSG00000037795	N4bp2	NEDD4 binding protein 2 [Source:MGI Symbol;Acc:MGI:2684414]	chr5:65763521-65830108|+	19.4091	15.8648	0.284891	0.00985113	5520.49
ENSMUSG00000021712	Trim23	tripartite motif-containing 23 [Source:MGI Symbol;Acc:MGI:1933161]	chr13:104178797-104203372|+	3.2977	2.71084	0.284861	0.0387183	336.684
ENSMUSG00000021929	Kpna3	karyopherin (importin) alpha 3 [Source:MGI Symbol;Acc:MGI:1100863]	chr14:61365186-61439947|-	112.412	92.1547	0.284659	0.000354	6201.22
ENSMUSG00000006398	Cdc20	cell division cycle 20 [Source:MGI Symbol;Acc:MGI:1859866]	chr4:118432901-118437352|-	39.9672	32.8606	0.284559	0.0521148	955.435
ENSMUSG00000035181	Heatr5a	HEAT repeat containing 5A [Source:MGI Symbol;Acc:MGI:2444133]	chr12:51875871-51971321|-	2.38681	1.94915	0.284199	0.0840638	1056.56
ENSMUSG00000034218	Atm	ataxia telangiectasia mutated [Source:MGI Symbol;Acc:MGI:107202]	chr9:53439149-53536740|-	2.23474	1.8385	0.283744	0.0793889	332.896
ENSMUSG00000028678	Kif2c	kinesin family member 2C [Source:MGI Symbol;Acc:MGI:1921054]	chr4:117159639-117182639|-	18.1991	14.9363	0.28374	0.0370318	1534.79
ENSMUSG00000000804	Usp32	ubiquitin specific peptidase 32 [Source:MGI Symbol;Acc:MGI:2144475]	chr11:84984442-85140161|-	6.96232	5.69353	0.283654	0.0604922	1012.28
ENSMUSG00000030204	Ddx47	DEAD (Asp-Glu-Ala-Asp) box polypeptide 47 [Source:MGI Symbol;Acc:MGI:1915005]	chr6:135011612-135023776|+	4.6245	3.80194	0.283314	0.0471743	586.97
ENSMUSG00000056531	Ccdc18	coiled-coil domain containing 18 [Source:MGI Symbol;Acc:MGI:1922974]	chr5:108132875-108233628|+	19.1812	15.7725	0.283141	0.0571037	1737.29
ENSMUSG00000042605	Atxn2	ataxin 2 [Source:MGI Symbol;Acc:MGI:1277223]	chr5:121711337-121816493|+	20.1671	16.6483	0.282605	0.00254891	4430.2
ENSMUSG00000009112	Bcl2l13	BCL2-like 13 (apoptosis facilitator) [Source:MGI Symbol;Acc:MGI:2136959]	chr6:120836212-120892842|+	6.82594	5.61061	0.281958	0.0607865	1220.25
ENSMUSG00000058267	Mrps14	mitochondrial ribosomal protein S14 [Source:MGI Symbol;Acc:MGI:1928141]	chr1:160195215-160202170|+	12.4865	10.3035	0.280851	0.0103001	573.117
ENSMUSG00000020739	Nup85	nucleoporin 85 [Source:MGI Symbol;Acc:MGI:3046173]	chr11:115564434-115583985|+	30.6324	25.2676	0.280139	0.0254286	1409.38
ENSMUSG00000032485	Scap	SREBF chaperone [Source:MGI Symbol;Acc:MGI:2135958]	chr9:110333288-110384950|+	18.0927	14.8291	0.280027	0.0259322	2964.29
ENSMUSG00000038299	Wdr36	WD repeat domain 36 [Source:MGI Symbol;Acc:MGI:1917819]	chr18:32837225-32866420|+	14.739	12.121	0.279898	0.0212309	1200.39
ENSMUSG00000030101	Sumf1	sulfatase modifying factor 1 [Source:MGI Symbol;Acc:MGI:1889844]	chr6:108107028-108185582|-	9.96752	8.23249	0.279758	0.0451924	571.962
ENSMUSG00000056608	Chd9	chromodomain helicase DNA binding protein 9 [Source:MGI Symbol;Acc:MGI:1924001]	chr8:90828352-91054516|+	11.7248	9.62334	0.279524	0.0284623	5545.57
ENSMUSG00000034297	Med13	mediator complex subunit 13 [Source:MGI Symbol;Acc:MGI:3029632]	chr11:86267033-86357602|-	29.3325	24.1522	0.279282	0.000447	4174.09
ENSMUSG00000031538	Plat	plasminogen activator, tissue [Source:MGI Symbol;Acc:MGI:97610]	chr8:22757727-22782844|+	29.8062	24.4022	0.279045	0.090208	17883.3
ENSMUSG00000038544	Inip	INTS3 and NABP interacting protein [Source:MGI Symbol;Acc:MGI:1913459]	chr4:59769637-59801589|-	10.4632	8.63588	0.278446	0.00245604	980.584
ENSMUSG00000026341	Actr3	ARP3 actin-related protein 3 [Source:MGI Symbol;Acc:MGI:1921367]	chr1:125392905-125435727|-	59.8363	49.3257	0.277993	0.0106973	3764.07
ENSMUSG00000039936	Pik3cd	phosphatidylinositol 3-kinase catalytic delta polypeptide [Source:MGI Symbol;Acc:MGI:1098211]	chr4:149649168-149702571|-	59.7474	49.1921	0.277798	0.00970216	5578.5
ENSMUSG00000027829	Ccnl1	cyclin L1 [Source:MGI Symbol;Acc:MGI:1922664]	chr3:65946151-65958249|-	8.54034	7.05475	0.277007	0.0198496	744.689
ENSMUSG00000026430	Rassf5	Ras association (RalGDS/AF-6) domain family member 5 [Source:MGI Symbol;Acc:MGI:1926375]	chr1:131176410-131245258|-	22.1324	18.2383	0.276805	0.0292255	1298.68
ENSMUSG00000034160	Ogt	O-linked N-acetylglucosamine (GlcNAc) transferase (UDP-N-acetylglucosamine:polypeptide-N-acetylglucosaminyl transferase) [Source:MGI Symbol;Acc:MGI:1339639]	chrX:101640060-101684351|+	7.06693	5.83947	0.276452	0.0984772	1175.83
ENSMUSG00000109718	Trim61	tripartite motif-containing 61 [Source:MGI Symbol;Acc:MGI:2387432]	chr8:65012987-65018523|-	1298.89	1078.71	0.276198	0.0105638	32585.3
ENSMUSG00000046324	Ermp1	endoplasmic reticulum metallopeptidase 1 [Source:MGI Symbol;Acc:MGI:106250]	chr19:29608214-29648415|-	166.938	137.536	0.275775	0.0144072	22976.8
ENSMUSG00000023852	Chd1	chromodomain helicase DNA binding protein 1 [Source:MGI Symbol;Acc:MGI:88393]	chr17:15704967-17394898|+	8.48092	7.01451	0.275518	0.033991	1493.53
ENSMUSG00000029388	Eif2b1	eukaryotic translation initiation factor 2B, subunit 1 (alpha) [Source:MGI Symbol;Acc:MGI:2384802]	chr5:124570213-124579131|-	79.1333	65.4277	0.275154	0.00191544	3172.41
ENSMUSG00000019899	Lama2	laminin, alpha 2 [Source:MGI Symbol;Acc:MGI:99912]	chr10:26980036-27619758|-	2.8857	2.38368	0.274554	0.0249556	1621.65
ENSMUSG00000004947	Dtx2	deltex 2, E3 ubiquitin ligase [Source:MGI Symbol;Acc:MGI:1921448]	chr5:135994800-136032872|+	44.548	36.858	0.274419	0.00300119	5332.81
ENSMUSG00000020455	Trim11	tripartite motif-containing 11 [Source:MGI Symbol;Acc:MGI:2137355]	chr11:58978093-58991458|+	10.0224	8.31175	0.273784	0.0340944	596.751
ENSMUSG00000037236	Matr3	matrin 3 [Source:MGI Symbol;Acc:MGI:1298379]	chr18:35562146-35593835|+	13.9063	11.4743	0.272639	0.0263733	2288.23
ENSMUSG00000062822	4833420G17Rik	RIKEN cDNA 4833420G17 gene [Source:MGI Symbol;Acc:MGI:1914642]	chr13:119462759-119486117|+	31.8785	26.3321	0.272376	0.0845608	1056.08
ENSMUSG00000030031	Kbtbd8	kelch repeat and BTB (POZ) domain containing 8 [Source:MGI Symbol;Acc:MGI:2661430]	chr6:95117240-95129790|+	190.395	157.879	0.27203	0.00567062	15111.1
ENSMUSG00000014355	Anapc1	anaphase promoting complex subunit 1 [Source:MGI Symbol;Acc:MGI:103097]	chr2:128610104-128687391|-	8.39206	6.92887	0.271976	0.0160902	2384.89
ENSMUSG00000019818	Cd164	CD164 antigen [Source:MGI Symbol;Acc:MGI:1859568]	chr10:41519414-41531048|+	52.3295	43.2845	0.271719	0.00360951	4448.65
ENSMUSG00000034163	Zfc3h1	zinc finger, C3H1-type containing [Source:MGI Symbol;Acc:MGI:2446143]	chr10:115384959-115432772|+	10.636	8.82508	0.271574	0.0184145	1286.62
ENSMUSG00000034333	Zbed4	zinc finger, BED type containing 4 [Source:MGI Symbol;Acc:MGI:2682302]	chr15:88751660-88784516|+	16.5354	13.7374	0.270901	0.00558984	1439.03
ENSMUSG00000002477	Snrpd1	small nuclear ribonucleoprotein D1 [Source:MGI Symbol;Acc:MGI:98344]	chr18:10617796-10628230|+	59.4916	49.3442	0.270733	0.0143196	854.06
ENSMUSG00000025857	Dnaaf5	dynein, axonemal assembly factor 5 [Source:MGI Symbol;Acc:MGI:3616079]	chr5:139150223-139186510|+	74.2039	61.2642	0.270368	0.0220671	3807.77
ENSMUSG00000043881	Kbtbd7	kelch repeat and BTB (POZ) domain containing 7 [Source:MGI Symbol;Acc:MGI:2685141]	chr14:79426511-79431039|+	104.185	86.1214	0.269921	0.0633752	7709.86
ENSMUSG00000092073	Gm6205	predicted gene 6205 [Source:MGI Symbol;Acc:MGI:3779572]	chr5:94648382-94686353|+	372.348	307.589	0.26962	0.0574347	13706
ENSMUSG00000055933	Oosp3	oocyte secreted protein 3 [Source:MGI Symbol;Acc:MGI:2684943]	chr19:11697055-11711874|+	353.882	293.415	0.268535	0.0330312	3807.39
ENSMUSG00000060373	Hnrnpc	heterogeneous nuclear ribonucleoprotein C [Source:MGI Symbol;Acc:MGI:107795]	chr14:52073380-52104028|-	56.3791	46.9787	0.268433	0.0248814	2125.27
ENSMUSG00000038991	Txndc5	thioredoxin domain containing 5 [Source:MGI Symbol;Acc:MGI:2145316]	chr13:38500273-38528824|-	13.0293	10.7766	0.268285	0.0575219	1975.76
ENSMUSG00000020589	Fam49a	family with sequence similarity 49, member A [Source:MGI Symbol;Acc:MGI:1261783]	chr12:12262139-12380965|+	4.2663	3.53162	0.268034	0.0689268	710.508
ENSMUSG00000036815	Dpp10	dipeptidylpeptidase 10 [Source:MGI Symbol;Acc:MGI:2442409]	chr1:123321471-124045559|-	3.546	2.94821	0.267176	0.0126107	849.493
ENSMUSG00000032625	Thsd7a	thrombospondin, type I, domain containing 7A [Source:MGI Symbol;Acc:MGI:2685683]	chr6:12311610-12749410|-	8.48703	7.05148	0.266835	0.0390594	1648.88
ENSMUSG00000015002	Efr3a	EFR3 homolog A [Source:MGI Symbol;Acc:MGI:1923990]	chr15:65787034-65873816|+	3.65196	3.0373	0.265375	0.0966983	521.899
ENSMUSG00000038866	Zcchc2	zinc finger, CCHC domain containing 2 [Source:MGI Symbol;Acc:MGI:2444114]	chr1:105990406-106034074|+	28.124	23.4097	0.264853	0.00245251	3568.16
ENSMUSG00000035898	Uba6	ubiquitin-like modifier activating enzyme 6 [Source:MGI Symbol;Acc:MGI:1913894]	chr5:86109287-86172803|-	13.147	10.9422	0.264545	0.00516717	1771.02
ENSMUSG00000038187	Btbd10	BTB (POZ) domain containing 10 [Source:MGI Symbol;Acc:MGI:1916065]	chr7:113315626-113369392|-	33.8019	28.1921	0.262621	0.0314003	2895.17
ENSMUSG00000050619	Zscan29	zinc finger SCAN domains 29 [Source:MGI Symbol;Acc:MGI:2139317]	chr2:121158273-121171125|-	7.48831	6.24102	0.262252	0.0810092	758.965
ENSMUSG00000047832	Cdca4	cell division cycle associated 4 [Source:MGI Symbol;Acc:MGI:1919213]	chr12:112820229-112829423|-	23.0785	19.2746	0.261717	0.0133717	1384.95
ENSMUSG00000035941	Ibtk	inhibitor of Bruton agammaglobulinemia tyrosine kinase [Source:MGI Symbol;Acc:MGI:1918677]	chr9:85687360-85749334|-	57.7881	48.346	0.261299	0.0292255	7389.07
ENSMUSG00000022369	Mtbp	Mdm2, transformed 3T3 cell double minute p53 binding protein [Source:MGI Symbol;Acc:MGI:2146005]	chr15:55557408-55626423|+	6.58556	5.4902	0.261169	0.0644955	509.483
ENSMUSG00000040720	1110037F02Rik	RIKEN cDNA 1110037F02 gene [Source:MGI Symbol;Acc:MGI:1913435]	chr4:11485958-11550684|+	18.4279	15.393	0.26054	0.00126744	2731.14
ENSMUSG00000042029	Ncapg2	non-SMC condensin II complex, subunit G2 [Source:MGI Symbol;Acc:MGI:1923294]	chr12:116405402-116463731|+	13.4983	11.2925	0.260238	0.0103001	2611.05
ENSMUSG00000036450	Hif1an	hypoxia-inducible factor 1, alpha subunit inhibitor [Source:MGI Symbol;Acc:MGI:2442345]	chr19:44562850-44576274|+	8.62743	7.19385	0.259907	0.0627588	900.802
ENSMUSG00000024991	Eif3a	eukaryotic translation initiation factor 3, subunit A [Source:MGI Symbol;Acc:MGI:95301]	chr19:60761116-60790693|-	21.1361	17.6781	0.259368	0.0238232	2105.91
ENSMUSG00000020653	Klf11	Kruppel-like factor 11 [Source:MGI Symbol;Acc:MGI:2653368]	chr12:24651274-24662789|+	38.1858	31.988	0.259293	0.0631231	2235.39
ENSMUSG00000031012	Cask	calcium/calmodulin-dependent serine protein kinase (MAGUK family) [Source:MGI Symbol;Acc:MGI:1309489]	chrX:13517080-13851367|-	5.71272	4.7632	0.259237	0.0867545	820.178
ENSMUSG00000047412	Zbtb44	zinc finger and BTB domain containing 44 [Source:MGI Symbol;Acc:MGI:1925123]	chr9:31030644-31075885|+	18.6698	15.5303	0.257741	0.0845608	2548.95
ENSMUSG00000070345	Hsf5	heat shock transcription factor family member 5 [Source:MGI Symbol;Acc:MGI:2685585]	chr11:87617164-87659542|+	9.35738	7.83405	0.257509	0.0947369	592.831
ENSMUSG00000054102	Nlrp9a	NLR family, pyrin domain containing 9A [Source:MGI Symbol;Acc:MGI:2675292]	chr7:26535023-26575615|+	101.302	84.3841	0.257226	0.032492	6294.57
ENSMUSG00000049106	Dcaf5	DDB1 and CUL4 associated factor 5 [Source:MGI Symbol;Acc:MGI:2444785]	chr12:80335848-80436601|-	25.1422	21.0988	0.257202	0.00922198	2901.53
ENSMUSG00000060733	Ipmk	inositol polyphosphate multikinase [Source:MGI Symbol;Acc:MGI:1916968]	chr10:71347763-71433327|+	60.1671	50.3443	0.256796	0.00402638	5854.02
ENSMUSG00000063077	Kif1b	kinesin family member 1B [Source:MGI Symbol;Acc:MGI:108426]	chr4:149176319-149307693|-	8.24111	6.89134	0.256708	0.0153127	2043.71
ENSMUSG00000042851	Zc3h6	zinc finger CCCH type containing 6 [Source:MGI Symbol;Acc:MGI:1926001]	chr2:128967402-129018563|+	66.4986	55.9633	0.25636	0.0410129	6133.01
ENSMUSG00000071708	Sms	spermine synthase [Source:MGI Symbol;Acc:MGI:109490]	chrX:157443855-157492287|-	58.2488	48.6458	0.256064	0.0106	4270.56
ENSMUSG00000060630	Zfp735	zinc finger protein 735 [Source:MGI Symbol;Acc:MGI:1923640]	chr11:73688778-73713798|+	25.6395	21.3951	0.255917	0.0901804	1436.05
ENSMUSG00000022858	Tra2b	transformer 2 beta homolog (Drosophila) [Source:MGI Symbol;Acc:MGI:106016]	chr16:22244549-22266005|-	19.4654	16.4476	0.255754	0.0994694	1436.64
ENSMUSG00000025001	Hells	helicase, lymphoid specific [Source:MGI Symbol;Acc:MGI:106209]	chr19:38930915-38971051|+	11.9248	10.0099	0.25571	0.015446	1209.58
ENSMUSG00000040782	Rfwd2	ring finger and WD repeat domain 2 [Source:MGI Symbol;Acc:MGI:1347046]	chr1:159232320-159347640|+	37.4545	31.3596	0.255621	0.00703999	8701.5
ENSMUSG00000045969	Ing1	inhibitor of growth family, member 1 [Source:MGI Symbol;Acc:MGI:1349481]	chr8:11555571-11563251|+	13.057	10.9385	0.255319	0.065621	1374
ENSMUSG00000037933	Bicd2	bicaudal D homolog 2 (Drosophila) [Source:MGI Symbol;Acc:MGI:1924145]	chr13:49341585-49387026|+	14.8437	12.4431	0.255122	0.0212444	1331.46
ENSMUSG00000032047	Acat1	acetyl-Coenzyme A acetyltransferase 1 [Source:MGI Symbol;Acc:MGI:87870]	chr9:53580522-53610382|-	51.3742	42.7047	0.255089	0.0843357	2361.27
ENSMUSG00000047508	Mbd3l2	methyl-CpG binding domain protein 3-like 2 [Source:MGI Symbol;Acc:MGI:2158460]	chr9:18430654-18446316|+	132.859	111.626	0.253803	0.0167825	3591.53
ENSMUSG00000030753	Thap12	THAP domain containing 12 [Source:MGI Symbol;Acc:MGI:1920231]	chr7:98703103-98718062|+	14.0661	11.8172	0.252345	0.0618383	799.27
ENSMUSG00000038518	Jarid2	jumonji, AT rich interactive domain 2 [Source:MGI Symbol;Acc:MGI:104813]	chr13:44729474-44921643|+	20.6165	17.3055	0.252245	0.00232533	3625.36
ENSMUSG00000024789	Jak2	Janus kinase 2 [Source:MGI Symbol;Acc:MGI:96629]	chr19:29251828-29313080|+	132.711	111.366	0.252129	0.000728	8987.39
ENSMUSG00000020716	Nf1	neurofibromin 1 [Source:MGI Symbol;Acc:MGI:97306]	chr11:79339693-79581612|+	6.99094	5.87558	0.252003	0.00111914	1830.35
ENSMUSG00000045248	Med26	mediator complex subunit 26 [Source:MGI Symbol;Acc:MGI:1917875]	chr8:72494561-72548270|-	9.66859	8.14089	0.251715	0.0933377	613.23
ENSMUSG00000057406	Nsd2	nuclear receptor binding SET domain protein 2 [Source:MGI Symbol;Acc:MGI:1276574]	chr5:33820725-33897975|+	8.63311	7.2662	0.250722	0.00387425	2230.2
ENSMUSG00000001158	Snrnp27	small nuclear ribonucleoprotein 27 (U4/U6.U5) [Source:MGI Symbol;Acc:MGI:1913868]	chr6:86675151-86684522|-	57.6382	48.5333	0.250478	0.0273917	1306.18
ENSMUSG00000044700	Tmem201	transmembrane protein 201 [Source:MGI Symbol;Acc:MGI:1196277]	chr4:149715375-149738044|-	13.958	11.7289	0.250125	0.0141325	3718.16
ENSMUSG00000029642	Polr1d	polymerase (RNA) I polypeptide D [Source:MGI Symbol;Acc:MGI:108403]	chr5:147077050-147111597|+	12.4014	10.4281	0.249805	0.078844	1366.56
ENSMUSG00000041741	Pde3a	phosphodiesterase 3A, cGMP inhibited [Source:MGI Symbol;Acc:MGI:1860764]	chr6:141249269-141507448|+	16.3899	13.7803	0.249552	0.00831316	7126.4
ENSMUSG00000022884	Eif4a2	eukaryotic translation initiation factor 4A2 [Source:MGI Symbol;Acc:MGI:106906]	chr16:23107444-23114136|+	29.7236	25.0527	0.248907	0.0271895	2373.46
ENSMUSG00000022538	Lsg1	large 60S subunit nuclear export GTPase 1 [Source:MGI Symbol;Acc:MGI:107236]	chr16:30560494-30587592|-	6.35335	5.35014	0.247737	0.0408303	525.586
ENSMUSG00000021216	Tubal3	tubulin, alpha-like 3 [Source:MGI Symbol;Acc:MGI:3588215]	chr13:3918274-3935277|+	23.7769	20.1295	0.247697	0.0848642	1084.48
ENSMUSG00000031601	Cnot7	CCR4-NOT transcription complex, subunit 7 [Source:MGI Symbol;Acc:MGI:1298230]	chr8:40492540-40515847|-	73.1759	61.338	0.24715	0.0711282	5555.92
ENSMUSG00000001833	2018-09-07	septin 7 [Source:MGI Symbol;Acc:MGI:1335094]	chr9:25252439-25308571|+	3.54246	2.99025	0.246551	0.0327475	1008.59
ENSMUSG00000031987	Egln1	egl-9 family hypoxia-inducible factor 1 [Source:MGI Symbol;Acc:MGI:1932286]	chr8:124908587-124949324|-	33.1648	27.8537	0.245917	0.0485557	2629.78
ENSMUSG00000031482	Slc25a15	solute carrier family 25 (mitochondrial carrier ornithine transporter), member 15 [Source:MGI Symbol;Acc:MGI:1342274]	chr8:22375551-22398597|-	29.2212	24.5495	0.24558	0.0867638	2536.21
ENSMUSG00000055022	Cntn1	contactin 1 [Source:MGI Symbol;Acc:MGI:105980]	chr15:92051165-92341967|+	3.0034	2.53114	0.245446	0.0990585	554.142
ENSMUSG00000021814	Anxa7	annexin A7 [Source:MGI Symbol;Acc:MGI:88031]	chr14:20455261-20480133|-	135.463	114.17	0.245065	0.00257804	4970.96
ENSMUSG00000072813	E330014E10Rik	RIKEN cDNA E330014E10 gene [Source:MGI Symbol;Acc:MGI:3615333]	chr5:95775990-95804708|+	228.425	194.019	0.244993	0.00772731	9258.99
ENSMUSG00000032397	Tipin	timeless interacting protein [Source:MGI Symbol;Acc:MGI:1921571]	chr9:64281581-64305424|+	38.4262	32.5401	0.244748	0.0643672	929.789
ENSMUSG00000014353	Tmem87b	transmembrane protein 87B [Source:MGI Symbol;Acc:MGI:1919727]	chr2:128818118-128854261|+	7.67945	6.49417	0.244639	0.0187564	1322.76
ENSMUSG00000025038	Efhc2	EF-hand domain (C-terminal) containing 2 [Source:MGI Symbol;Acc:MGI:1921655]	chrX:17132049-17319368|-	24.6989	20.8402	0.244584	0.0948131	959.497
ENSMUSG00000020905	Usp43	ubiquitin specific peptidase 43 [Source:MGI Symbol;Acc:MGI:2444541]	chr11:67854523-67922153|-	6.20766	5.24531	0.243916	0.0538318	400.578
ENSMUSG00000079423	Gm3286	predicted gene 3286 [Source:MGI Symbol;Acc:MGI:3781464]	chr5:95510758-95522953|+	188.626	160.431	0.242041	0.00425899	8051.44
ENSMUSG00000027635	Dsn1	DSN1 homolog, MIS12 kinetochore complex component [Source:MGI Symbol;Acc:MGI:1914184]	chr2:156995265-157007154|-	52.1328	44.2302	0.241077	0.0274301	2741.08
ENSMUSG00000058173	Smco4	single-pass membrane protein with coiled-coil domains 4 [Source:MGI Symbol;Acc:MGI:3039636]	chr9:15493432-15545260|+	171.271	144.817	0.240364	0.0544527	2040.24
ENSMUSG00000078515	Ddi2	DNA-damage inducible protein 2 [Source:MGI Symbol;Acc:MGI:1917244]	chr4:141677549-141723419|-	15.9171	13.5011	0.239404	0.0305634	3263.39
ENSMUSG00000006169	Clint1	clathrin interactor 1 [Source:MGI Symbol;Acc:MGI:2144243]	chr11:45852051-45910625|+	9.27534	7.857	0.239338	0.0170596	2128.05
ENSMUSG00000028282	Casp8ap2	caspase 8 associated protein 2 [Source:MGI Symbol;Acc:MGI:1349399]	chr4:32615451-32653265|+	89.7827	76.2765	0.238259	0.0314096	8903.7
ENSMUSG00000024043	Arhgap28	Rho GTPase activating protein 28 [Source:MGI Symbol;Acc:MGI:2147003]	chr17:67842713-68004120|-	18.8783	15.9946	0.237865	0.0469343	2221.24
ENSMUSG00000029110	Rnf4	ring finger protein 4 [Source:MGI Symbol;Acc:MGI:1201691]	chr5:34336289-34355629|+	42.8525	36.3981	0.237812	0.00516717	4603.87
ENSMUSG00000032410	Xrn1	5'-3' exoribonuclease 1 [Source:MGI Symbol;Acc:MGI:891964]	chr9:95954760-96057803|+	3.37296	2.86695	0.237351	0.0960106	1002.94
ENSMUSG00000005493	Msh4	mutS homolog 4 [Source:MGI Symbol;Acc:MGI:1860077]	chr3:153857149-153906138|-	5.37178	4.56366	0.237136	0.0366444	550.224
ENSMUSG00000047731	Wbp1l	WW domain binding protein 1 like [Source:MGI Symbol;Acc:MGI:107577]	chr19:46599084-46657389|+	16.8316	14.3059	0.237102	0.00902615	1488.35
ENSMUSG00000040717	Il17rd	interleukin 17 receptor D [Source:MGI Symbol;Acc:MGI:2159727]	chr14:27039001-27107286|+	11.4899	9.75934	0.236698	0.075602	2619.5
ENSMUSG00000068205	Macrod2	MACRO domain containing 2 [Source:MGI Symbol;Acc:MGI:1920149]	chr2:140395309-142392966|+	9.1841	7.83714	0.235085	0.0996504	1846.75
ENSMUSG00000028138	Adh5	alcohol dehydrogenase 5 (class III), chi polypeptide [Source:MGI Symbol;Acc:MGI:87929]	chr3:138443093-138455499|+	36.499	31.0586	0.234521	0.0976231	2538.19
ENSMUSG00000051351	Zfp46	zinc finger protein 46 [Source:MGI Symbol;Acc:MGI:99192]	chr4:136284683-136293942|+	17.5712	14.9447	0.233756	0.0503374	1366.16
ENSMUSG00000030909	Anks4b	ankyrin repeat and sterile alpha motif domain containing 4B [Source:MGI Symbol;Acc:MGI:1919324]	chr7:120173858-120185586|+	24.9932	21.3342	0.232889	0.0466408	1515.87
ENSMUSG00000033382	Trappc8	trafficking protein particle complex 8 [Source:MGI Symbol;Acc:MGI:2443008]	chr18:20817224-20896078|-	14.4452	12.2715	0.231965	0.0398616	2242.54
ENSMUSG00000029089	5730480H06Rik	RIKEN cDNA 5730480H06 gene [Source:MGI Symbol;Acc:MGI:1917842]	chr5:48327952-48414294|+	21.6832	18.5053	0.231831	0.0147292	3123.35
ENSMUSG00000037523	Mavs	mitochondrial antiviral signaling protein [Source:MGI Symbol;Acc:MGI:2444773]	chr2:131234063-131248025|+	8.35642	7.11343	0.231658	0.0982781	510.483
ENSMUSG00000024515	Smad4	SMAD family member 4 [Source:MGI Symbol;Acc:MGI:894293]	chr18:73639009-73703780|-	8.74531	7.45216	0.23109	0.0573918	993.517
ENSMUSG00000034826	Nup54	nucleoporin 54 [Source:MGI Symbol;Acc:MGI:1920460]	chr5:92415540-92435219|-	29.4521	25.1535	0.230408	0.0110768	1396.15
ENSMUSG00000058799	Nap1l1	nucleosome assembly protein 1-like 1 [Source:MGI Symbol;Acc:MGI:1855693]	chr10:111473223-111498150|+	66.3085	56.5693	0.23034	0.00151735	4256.6
ENSMUSG00000021109	Hif1a	hypoxia inducible factor 1, alpha subunit [Source:MGI Symbol;Acc:MGI:106918]	chr12:73901375-73947530|+	29.3753	25.0172	0.230035	0.0146204	3229.02
ENSMUSG00000034761	Map4k5	mitogen-activated protein kinase kinase kinase kinase 5 [Source:MGI Symbol;Acc:MGI:1925503]	chr12:69803750-69893200|-	27.007	23.0273	0.229306	0.0233604	4412.18
ENSMUSG00000036333	Kidins220	kinase D-interacting substrate 220 [Source:MGI Symbol;Acc:MGI:1924730]	chr12:24974925-25063152|+	9.32944	7.97478	0.228497	0.0313239	2460.47
ENSMUSG00000015697	Setdb1	SET domain, bifurcated 1 [Source:MGI Symbol;Acc:MGI:1934229]	chr3:95323525-95357202|-	55.8125	47.6183	0.22785	0.00826654	5692.4
ENSMUSG00000024856	Cdk2ap2	CDK2-associated protein 2 [Source:MGI Symbol;Acc:MGI:1098779]	chr19:4097182-4099019|+	33.5347	28.6699	0.226984	0.0810891	685.294
ENSMUSG00000024104	Washc2	WASH complex subunit 2` [Source:MGI Symbol;Acc:MGI:106463]	chr6:116208038-116262686|+	7.95654	6.82241	0.224362	0.0638377	871.669
ENSMUSG00000039652	Cpeb3	cytoplasmic polyadenylation element binding protein 3 [Source:MGI Symbol;Acc:MGI:2443075]	chr19:37021291-37208601|-	19.66	16.8334	0.224259	0.028036	2757.1
ENSMUSG00000032293	Ireb2	iron responsive element binding protein 2 [Source:MGI Symbol;Acc:MGI:1928268]	chr9:54863789-54912530|+	45.0534	38.6858	0.224246	0.0133008	6145.69
ENSMUSG00000032402	Smad3	SMAD family member 3 [Source:MGI Symbol;Acc:MGI:1201674]	chr9:63646767-63757994|-	36.9365	31.698	0.222336	0.00675911	4230.6
ENSMUSG00000034883	Lrr1	leucine rich repeat protein 1 [Source:MGI Symbol;Acc:MGI:1916956]	chr12:69168814-69179009|+	252.249	216.592	0.221574	0.057271	5103.49
ENSMUSG00000036792	Mbd5	methyl-CpG binding domain protein 5 [Source:MGI Symbol;Acc:MGI:2138934]	chr2:48949508-49325405|+	10.0378	8.61885	0.220931	0.0240885	2602.48
ENSMUSG00000022698	Naa50	N(alpha)-acetyltransferase 50, NatE catalytic subunit [Source:MGI Symbol;Acc:MGI:1919367]	chr16:44139830-44163366|+	79.212	67.7972	0.220867	0.0757884	5184.44
ENSMUSG00000027309	4930402H24Rik	RIKEN cDNA 4930402H24 gene [Source:MGI Symbol;Acc:MGI:1923029]	chr2:130706200-130906406|-	5.23508	4.50133	0.219955	0.0885357	1458.05
ENSMUSG00000041219	Arhgap11a	Rho GTPase activating protein 11A [Source:MGI Symbol;Acc:MGI:2444300]	chr2:113831492-113848661|-	65.2749	56.3045	0.219365	0.0290833	5290.76
ENSMUSG00000028820	Sfpq	splicing factor proline/glutamine rich (polypyrimidine tract binding protein associated) [Source:MGI Symbol;Acc:MGI:1918764]	chr4:127021324-127037013|+	35.5629	30.611	0.21922	0.023751	2597.49
ENSMUSG00000027823	Gmps	guanine monophosphate synthetase [Source:MGI Symbol;Acc:MGI:2448526]	chr3:63976106-64022579|+	15.9804	13.7741	0.218427	0.0923842	2656.05
ENSMUSG00000061731	Ext1	exostoses (multiple) 1 [Source:MGI Symbol;Acc:MGI:894663]	chr15:53064038-53346159|-	13.9892	12.038	0.218232	0.0815061	2194.25
ENSMUSG00000003062	Stard3nl	STARD3 N-terminal like [Source:MGI Symbol;Acc:MGI:1923455]	chr13:19357676-19395795|-	8.25892	7.10979	0.217307	0.0635791	658.497
ENSMUSG00000038902	Pogz	pogo transposable element with ZNF domain [Source:MGI Symbol;Acc:MGI:2442117]	chr3:94837567-94882326|+	17.5033	15.0915	0.216827	0.00906105	2307.92
ENSMUSG00000033991	Ttc37	tetratricopeptide repeat domain 37 [Source:MGI Symbol;Acc:MGI:2679923]	chr13:76098734-76187983|+	36.8805	31.8768	0.215657	0.027116	2846.21
ENSMUSG00000019790	Stxbp5	syntaxin binding protein 5 (tomosyn) [Source:MGI Symbol;Acc:MGI:1926058]	chr10:9755547-9901079|-	20.8928	17.9682	0.214179	0.0266085	4280.07
ENSMUSG00000047804	Akap10	A kinase (PRKA) anchor protein 10 [Source:MGI Symbol;Acc:MGI:1890218]	chr11:61871307-61930252|-	12.4749	10.7775	0.214039	0.0247691	1030.08
ENSMUSG00000021460	Auh	AU RNA binding protein/enoyl-coenzyme A hydratase [Source:MGI Symbol;Acc:MGI:1338011]	chr13:52835119-52929681|-	12.1349	10.4685	0.213635	0.0433147	1798.62
ENSMUSG00000025231	Sufu	suppressor of fused homolog (Drosophila) [Source:MGI Symbol;Acc:MGI:1345643]	chr19:46396896-46488804|+	8.49023	7.34461	0.213049	0.0927268	1319.3
ENSMUSG00000032547	Ryk	receptor-like tyrosine kinase [Source:MGI Symbol;Acc:MGI:101766]	chr9:102834917-102908305|+	20.8254	17.9772	0.212665	0.0575178	1382.82
ENSMUSG00000075023	Accsl	1-aminocyclopropane-1-carboxylate synthase (non-functional)-like [Source:MGI Symbol;Acc:MGI:3584519]	chr2:93855361-93869157|-	449.566	389.926	0.212175	0.0318697	17669
ENSMUSG00000003135	Cnot11	CCR4-NOT transcription complex, subunit 11 [Source:MGI Symbol;Acc:MGI:106580]	chr1:39534992-39546889|+	23.0307	19.9244	0.211656	0.0266124	1690.91
ENSMUSG00000029328	Hnrnpdl	heterogeneous nuclear ribonucleoprotein D-like [Source:MGI Symbol;Acc:MGI:1355299]	chr5:100033577-100039664|-	38.504	33.3908	0.211429	0.0528835	2593.62
ENSMUSG00000033257	Ttll4	tubulin tyrosine ligase-like family, member 4 [Source:MGI Symbol;Acc:MGI:1914784]	chr1:74661745-74703730|+	14.5882	12.6104	0.210593	0.017343	2620.85
ENSMUSG00000040329	Il7	interleukin 7 [Source:MGI Symbol;Acc:MGI:96561]	chr3:7569994-7613760|-	24.0317	20.7678	0.210545	0.0842376	1791.73
ENSMUSG00000071856	Mcc	mutated in colorectal cancers [Source:MGI Symbol;Acc:MGI:96930]	chr18:44425060-44812182|-	16.896	14.6093	0.210525	0.00899424	4429.73
ENSMUSG00000040423	Rc3h1	RING CCCH (C3H) domains 1 [Source:MGI Symbol;Acc:MGI:2685397]	chr1:160906418-160974978|+	14.1487	12.294	0.210411	0.083847	2212.35
ENSMUSG00000021000	Ctage5	melanoma inhibitory activity 2 [Source:MGI Symbol;Acc:MGI:2159614]	chr12:59095799-59191583|+	22.8773	19.8347	0.210335	0.00163321	4684.93
ENSMUSG00000027678	Ncoa3	nuclear receptor coactivator 3 [Source:MGI Symbol;Acc:MGI:1276535]	chr2:165992636-166073242|+	55.2712	47.871	0.209748	0.000724	6461.48
ENSMUSG00000029267	Mtf2	metal response element binding transcription factor 2 [Source:MGI Symbol;Acc:MGI:105050]	chr5:108065674-108109004|+	16.1918	14.0462	0.209367	0.0534934	1490.32
ENSMUSG00000025190	Got1	glutamic-oxaloacetic transaminase 1, soluble [Source:MGI Symbol;Acc:MGI:95791]	chr19:43499752-43524605|-	15.7994	13.6724	0.209357	0.078844	637.987
ENSMUSG00000028788	Ptp4a2	protein tyrosine phosphatase 4a2 [Source:MGI Symbol;Acc:MGI:1277117]	chr4:129811219-129850003|+	109.596	94.9155	0.209302	0.00248433	7428.86
ENSMUSG00000032640	Chsy1	chondroitin sulfate synthase 1 [Source:MGI Symbol;Acc:MGI:2681120]	chr7:66109515-66173798|+	72.7678	63.1219	0.207216	0.0236169	6081.62
ENSMUSG00000021608	Lpcat1	lysophosphatidylcholine acyltransferase 1 [Source:MGI Symbol;Acc:MGI:2384812]	chr13:73467197-73516422|+	24.5588	21.3096	0.20704	0.0165329	3834.43
ENSMUSG00000021068	Nin	ninein [Source:MGI Symbol;Acc:MGI:105108]	chr12:70011435-70113717|-	46.9649	40.7804	0.206267	0.0626329	12763.2
ENSMUSG00000031767	Nudt7	nudix (nucleoside diphosphate linked moiety X)-type motif 7 [Source:MGI Symbol;Acc:MGI:1914778]	chr8:114133557-114154739|+	23.1311	20.0486	0.206008	0.0707072	2260.77
ENSMUSG00000038646	Fam103a1	family with sequence similarity 103, member A1 [Source:MGI Symbol;Acc:MGI:1914398]	chr7:81762925-81769491|+	105.624	91.8079	0.205634	0.00902615	2185.19
ENSMUSG00000028556	Dock7	dedicator of cytokinesis 7 [Source:MGI Symbol;Acc:MGI:1914549]	chr4:98936671-99120915|-	12.1548	10.547	0.205105	0.0120768	3219.63
ENSMUSG00000025024	Smndc1	survival motor neuron domain containing 1 [Source:MGI Symbol;Acc:MGI:1923729]	chr19:53379214-53390573|-	17.3737	15.1064	0.203823	0.080333	524.812
ENSMUSG00000006699	Cdc42	cell division cycle 42 [Source:MGI Symbol;Acc:MGI:106211]	chr4:137319696-137357720|-	50.0352	43.4042	0.202576	0.0444137	2132.43
ENSMUSG00000051316	Taf7	TATA-box binding protein associated factor 7 [Source:MGI Symbol;Acc:MGI:1346348]	chr18:37640491-37644204|-	61.8968	53.9359	0.201955	0.0347557	2967.98
ENSMUSG00000021772	Nkiras1	NFKB inhibitor interacting Ras-like protein 1 [Source:MGI Symbol;Acc:MGI:1916971]	chr14:18271136-18283942|+	8.10149	7.05142	0.201769	0.0657608	801.535
ENSMUSG00000036202	Rif1	replication timing regulatory factor 1 [Source:MGI Symbol;Acc:MGI:1098622]	chr2:52072837-52122383|+	74.2136	64.5693	0.201385	0.0532358	12097
ENSMUSG00000026764	Kif5c	kinesin family member 5C [Source:MGI Symbol;Acc:MGI:1098269]	chr2:49619298-49774778|+	17.5198	15.2921	0.200014	0.0142317	1957.55
ENSMUSG00000038658	Ric1	RAB6A GEF complex partner 1 [Source:MGI Symbol;Acc:MGI:1924893]	chr19:29522282-29606829|+	27.0841	23.5722	0.199529	0.0514566	4526.85
ENSMUSG00000068876	Cgn	cingulin [Source:MGI Symbol;Acc:MGI:1927237]	chr3:94760069-94786492|-	15.5253	13.5641	0.198938	0.0607601	1423.09
ENSMUSG00000022833	Ccdc14	coiled-coil domain containing 14 [Source:MGI Symbol;Acc:MGI:2443448]	chr16:34690616-34725194|+	70.1254	61.282	0.198605	0.0650388	4519.09
ENSMUSG00000041415	Dicer1	dicer 1, ribonuclease type III [Source:MGI Symbol;Acc:MGI:2177178]	chr12:104687742-104751952|-	51.2171	44.695	0.197158	0.0984034	15583.4
ENSMUSG00000070327	Rnf213	ring finger protein 213 [Source:MGI Symbol;Acc:MGI:1289196]	chr11:119393100-119487418|+	4.9956	4.36104	0.197106	0.0812869	1527.66
ENSMUSG00000062627	Mysm1	myb-like, SWIRM and MPN domains 1 [Source:MGI Symbol;Acc:MGI:2444584]	chr4:94942040-94979100|-	12.8758	11.2833	0.196966	0.0606322	1937.03
ENSMUSG00000027132	Katnbl1	katanin p80 subunit B like 1 [Source:MGI Symbol;Acc:MGI:1919675]	chr2:112379211-112414240|+	20.7479	18.1617	0.196591	0.0225215	1045.09
ENSMUSG00000022607	Ptk2	PTK2 protein tyrosine kinase 2 [Source:MGI Symbol;Acc:MGI:95481]	chr15:73205105-73423191|-	12.6257	11.0512	0.195147	0.0785112	912.353
ENSMUSG00000001376	Vps50	VPS50 EARP/GARPII complex subunit [Source:MGI Symbol;Acc:MGI:1920538]	chr6:3498382-3603531|+	14.4469	12.6331	0.194987	0.0482308	2364.84
ENSMUSG00000019715	Gle1	GLE1 RNA export mediator (yeast) [Source:MGI Symbol;Acc:MGI:1921662]	chr2:29935426-29960371|+	28.4202	24.803	0.194556	0.0802811	2589
ENSMUSG00000005312	Ubqln1	ubiquilin 1 [Source:MGI Symbol;Acc:MGI:1860276]	chr13:58176156-58215653|-	112.596	98.4866	0.194163	0.0540424	7347.37
ENSMUSG00000063317	Usp31	ubiquitin specific peptidase 31 [Source:MGI Symbol;Acc:MGI:1923429]	chr7:121642021-121707253|-	19.7786	17.3605	0.19236	0.0212309	2974.38
ENSMUSG00000031586	Rbpms	RNA binding protein gene with multiple splicing [Source:MGI Symbol;Acc:MGI:1334446]	chr8:33782643-33929863|-	35.8718	31.3969	0.190339	0.0665678	2558.48
ENSMUSG00000005698	Ctcf	CCCTC-binding factor [Source:MGI Symbol;Acc:MGI:109447]	chr8:105636568-105682922|+	42.7076	37.6348	0.18856	0.0704197	3150.72
ENSMUSG00000039286	Fndc3b	fibronectin type III domain containing 3B [Source:MGI Symbol;Acc:MGI:1919257]	chr3:27416162-27711307|-	10.933	9.59183	0.188337	0.0604922	1960.96
ENSMUSG00000041459	Tardbp	TAR DNA binding protein [Source:MGI Symbol;Acc:MGI:2387629]	chr4:148612382-148627019|-	41.3687	36.3767	0.187937	0.00404456	4154.34
ENSMUSG00000059921	Unc5c	unc-5 netrin receptor C [Source:MGI Symbol;Acc:MGI:1095412]	chr3:141465216-141834924|+	8.1291	7.1262	0.187411	0.0616804	4363.54
ENSMUSG00000033364	Usp37	ubiquitin specific peptidase 37 [Source:MGI Symbol;Acc:MGI:2442483]	chr1:74435511-74544284|-	23.1529	20.3771	0.185542	0.017582	3558.42
ENSMUSG00000066406	Akap13	A kinase (PRKA) anchor protein 13 [Source:MGI Symbol;Acc:MGI:2676556]	chr7:75455534-75754609|+	5.37066	4.72939	0.185521	0.0679677	2667.98
ENSMUSG00000025586	Cpeb1	cytoplasmic polyadenylation element binding protein 1 [Source:MGI Symbol;Acc:MGI:108442]	chr7:81347026-81455465|-	33.818	29.7395	0.185403	0.0260289	5727.06
ENSMUSG00000038024	Dennd4c	DENN/MADD domain containing 4C [Source:MGI Symbol;Acc:MGI:1914769]	chr4:86748555-86850603|+	35.6189	31.4079	0.183953	0.0218945	4691.99
ENSMUSG00000037957	Wdr20	WD repeat domain 20 [Source:MGI Symbol;Acc:MGI:1916891]	chr12:110737944-110804238|+	65.6776	57.9114	0.182734	0.0954476	5668.2
ENSMUSG00000059474	Mbtd1	mbt domain containing 1 [Source:MGI Symbol;Acc:MGI:2143977]	chr11:93885852-93946985|+	66.1596	58.4147	0.180647	0.00829162	12722.5
ENSMUSG00000001150	Mcm3ap	minichromosome maintenance complex component 3 associated protein [Source:MGI Symbol;Acc:MGI:1930089]	chr10:76468927-76515857|+	14.4773	12.7923	0.178968	0.0739599	2301.3
ENSMUSG00000025234	Arih1	ariadne RBR E3 ubiquitin protein ligase 1 [Source:MGI Symbol;Acc:MGI:1344363]	chr9:59388258-59486618|-	75.2284	66.4027	0.178361	0.0418984	9335.79
ENSMUSG00000021555	Naa35	N(alpha)-acetyltransferase 35, NatC auxiliary subunit [Source:MGI Symbol;Acc:MGI:1925939]	chr13:59585259-59634798|+	22.0499	19.4936	0.17717	0.0607865	1861.17
ENSMUSG00000074682	Zcchc3	zinc finger, CCHC domain containing 3 [Source:MGI Symbol;Acc:MGI:1915167]	chr2:152411955-152415027|-	59.0773	52.3865	0.174574	0.0676784	2524.54
ENSMUSG00000053012	Krcc1	lysine-rich coiled-coil 1 [Source:MGI Symbol;Acc:MGI:1889377]	chr6:71271677-71285319|+	52.9101	47.0495	0.172779	0.0851372	1229.06
ENSMUSG00000025982	Sf3b1	splicing factor 3b, subunit 1 [Source:MGI Symbol;Acc:MGI:1932339]	chr1:54985169-55027481|-	34.4565	30.5607	0.171703	0.0551912	5887.53
ENSMUSG00000033031	C330027C09Rik	RIKEN cDNA C330027C09 gene [Source:MGI Symbol;Acc:MGI:2146335]	chr16:48994185-49019709|+	20.8713	18.5414	0.171658	0.0904704	1879.89
ENSMUSG00000027852	Nras	neuroblastoma ras oncogene [Source:MGI Symbol;Acc:MGI:97376]	chr3:103058285-103067914|+	37.2791	33.2055	0.169512	0.051331	2500.95
ENSMUSG00000027115	Kif18a	kinesin family member 18A [Source:MGI Symbol;Acc:MGI:2446977]	chr2:109280738-109341747|+	11.0474	9.86182	0.16826	0.0741095	1499.71
ENSMUSG00000032253	Phip	pleckstrin homology domain interacting protein [Source:MGI Symbol;Acc:MGI:1932404]	chr9:82866159-82975516|-	5.02082	4.47828	0.167504	0.0650896	3129.23
ENSMUSG00000109511	Nup62	nucleoporin 62 [Source:MGI Symbol;Acc:MGI:1351500]	chr7:44816088-44830812|+	158.525	141.854	0.167498	0.041921	5802.17
ENSMUSG00000054310	Obox1	oocyte specific homeobox 1 [Source:MGI Symbol;Acc:MGI:1918718]	chr7:15388948-15556866|+	394.119	351.478	0.167419	0.0831911	11655.6
ENSMUSG00000056216	Cebpg	CCAAT/enhancer binding protein (C/EBP), gamma [Source:MGI Symbol;Acc:MGI:104982]	chr7:35046422-35056573|-	31.3127	27.9474	0.167074	0.0620758	2466.76
ENSMUSG00000034377	Tulp4	tubby like protein 4 [Source:MGI Symbol;Acc:MGI:1916092]	chr17:6106437-6251128|+	13.9691	12.5078	0.16284	0.0372342	3505.04
ENSMUSG00000030451	Herc2	HECT and RLD domain containing E3 ubiquitin protein ligase 2 [Source:MGI Symbol;Acc:MGI:103234]	chr7:56050196-56231800|+	22.9787	20.6477	0.15893	0.0258409	6252.9
ENSMUSG00000024456	Diaph1	diaphanous related formin 1 [Source:MGI Symbol;Acc:MGI:1194490]	chr18:37843601-37935476|-	21.0288	18.9296	0.154428	0.0872936	2387.37
ENSMUSG00000035310	Lin54	lin-54 homolog (C. elegans) [Source:MGI Symbol;Acc:MGI:2140902]	chr5:100441918-100500639|-	16.8645	15.2308	0.150825	0.0913544	1397.49
ENSMUSG00000026491	Ahctf1	AT hook containing transcription factor 1 [Source:MGI Symbol;Acc:MGI:1915033]	chr1:179744894-179803680|-	16.614	15.0051	0.147768	0.0853319	3872.98
ENSMUSG00000044468	Fam46c	family with sequence similarity 46, member C [Source:MGI Symbol;Acc:MGI:1921895]	chr3:100451628-100489324|-	176.284	161.052	0.133719	0.0643705	19828.4
ENSMUSG00000032254	Kif23	kinesin family member 23 [Source:MGI Symbol;Acc:MGI:1919069]	chr9:61915905-61946774|-	78.7111	72.0912	0.128019	0.0947369	10397.7
ENSMUSG00000039748	Exo1	exonuclease 1 [Source:MGI Symbol;Acc:MGI:1349427]	chr1:175880581-175913489|+	15.3429	16.8657	-0.132616	0.0972177	2532.56
ENSMUSG00000026554	Dcaf8	DDB1 and CUL4 associated factor 8 [Source:MGI Symbol;Acc:MGI:91860]	chr1:172148084-172197005|+	30.1655	33.3455	-0.138068	0.0944071	6070.88
ENSMUSG00000056014	A430033K04Rik	RIKEN cDNA A430033K04 gene [Source:MGI Symbol;Acc:MGI:3583896]	chr5:138622859-138652414|+	176.887	195.405	-0.138708	0.0831971	13476
ENSMUSG00000022201	Zfr	zinc finger RNA binding protein [Source:MGI Symbol;Acc:MGI:1341890]	chr15:12117831-12185683|+	51.1888	56.6476	-0.144324	0.0592375	5063.06
ENSMUSG00000059119	Nap1l4	nucleosome assembly protein 1-like 4 [Source:MGI Symbol;Acc:MGI:1316687]	chr7:143513579-143549106|-	46.0459	51.1015	-0.148978	0.0707072	2659.78
ENSMUSG00000019814	Ltv1	LTV1 ribosome biogenesis factor [Source:MGI Symbol;Acc:MGI:2447810]	chr10:13178140-13193168|-	33.3734	37.2096	-0.15318	0.0367294	1525.42
ENSMUSG00000024472	Dcp2	decapping mRNA 2 [Source:MGI Symbol;Acc:MGI:1917890]	chr18:44380502-44424969|+	39.1774	43.812	-0.156452	0.09727	5051.13
ENSMUSG00000005506	Celf1	CUGBP, Elav-like family member 1 [Source:MGI Symbol;Acc:MGI:1342295]	chr2:90940382-91019497|+	11.6794	13.0788	-0.160232	0.0571037	1692.91
ENSMUSG00000035151	Elmod2	ELMO/CED-12 domain containing 2 [Source:MGI Symbol;Acc:MGI:2445165]	chr8:83312632-83332486|-	20.2666	22.6587	-0.160845	0.0918996	5010.78
ENSMUSG00000054087	Fbxw28	F-box and WD-40 domain protein 28 [Source:MGI Symbol;Acc:MGI:3779847]	chr9:109322886-109339659|-	317.551	355.711	-0.161964	0.0153808	13018.2
ENSMUSG00000060657	Marf1	meiosis arrest female 1 [Source:MGI Symbol;Acc:MGI:2444505]	chr16:14109166-14159274|-	66.9893	74.9611	-0.162339	0.0437666	7578.23
ENSMUSG00000020368	Canx	calnexin [Source:MGI Symbol;Acc:MGI:88261]	chr11:50293961-50325673|-	49.6531	55.9118	-0.164887	0.0666252	4997.59
ENSMUSG00000028156	Eif4e	eukaryotic translation initiation factor 4E [Source:MGI Symbol;Acc:MGI:95305]	chr3:138526179-138559696|+	29.4549	33.2386	-0.168136	0.0676784	3181.28
ENSMUSG00000002489	Tiam1	T cell lymphoma invasion and metastasis 1 [Source:MGI Symbol;Acc:MGI:103306]	chr16:89787111-89980080|-	61.6391	69.2686	-0.169209	0.0844355	11157.8
ENSMUSG00000033352	Map2k4	mitogen-activated protein kinase kinase 4 [Source:MGI Symbol;Acc:MGI:1346869]	chr11:65688243-65788297|-	37.064	41.7938	-0.172654	0.0811105	3081.83
ENSMUSG00000040669	Phc1	polyhomeotic-like 1 (Drosophila) [Source:MGI Symbol;Acc:MGI:103248]	chr6:122317731-122340561|-	18.35	20.7563	-0.175203	0.0989188	2291.16
ENSMUSG00000022419	Deptor	DEP domain containing MTOR-interacting protein [Source:MGI Symbol;Acc:MGI:2146322]	chr15:55112317-55259271|+	29.0594	33.0211	-0.17781	0.0818096	4283.87
ENSMUSG00000034088	Hdlbp	high density lipoprotein (HDL) binding protein [Source:MGI Symbol;Acc:MGI:99256]	chr1:93405940-93478815|-	40.1166	45.5059	-0.179556	0.00936297	8095.58
ENSMUSG00000020166	Cnot2	CCR4-NOT transcription complex, subunit 2 [Source:MGI Symbol;Acc:MGI:1919318]	chr10:116485161-116581511|-	31.8761	36.2237	-0.179889	0.083847	2270.72
ENSMUSG00000038615	Nfe2l1	nuclear factor, erythroid derived 2,-like 1 [Source:MGI Symbol;Acc:MGI:99421]	chr11:96817414-96829968|-	45.9023	52.0974	-0.181242	0.0332116	4989.38
ENSMUSG00000040990	Sh3kbp1	SH3-domain kinase binding protein 1 [Source:MGI Symbol;Acc:MGI:1889583]	chrX:159627272-159978069|+	15.2303	17.314	-0.181562	0.0811105	3453.47
ENSMUSG00000052763	Zfp212	Zinc finger protein 212 [Source:MGI Symbol;Acc:MGI:2682609]	chr6:47920476-47932639|+	30.7827	35.1022	-0.183691	0.096623	1625.71
ENSMUSG00000057363	Uxs1	UDP-glucuronate decarboxylase 1 [Source:MGI Symbol;Acc:MGI:1915133]	chr1:43746966-43827800|-	13.0145	14.8463	-0.185905	0.0616431	1545.69
ENSMUSG00000006418	Rnf114	ring finger protein 114 [Source:MGI Symbol;Acc:MGI:1933159]	chr2:167492645-167516173|+	160.133	183.122	-0.186965	0.0258526	9454.29
ENSMUSG00000030559	Rab38	RAB38, member RAS oncogene family [Source:MGI Symbol;Acc:MGI:1919683]	chr7:88430273-88491572|+	67.8795	77.5427	-0.189952	0.038827	2029.36
ENSMUSG00000020114	Cand1	cullin associated and neddylation disassociated 1 [Source:MGI Symbol;Acc:MGI:1261820]	chr10:119199255-119240055|-	25.7415	29.4415	-0.190193	0.0223768	3961.63
ENSMUSG00000032497	Lrrfip2	leucine rich repeat (in FLII) interacting protein 2 [Source:MGI Symbol;Acc:MGI:1918518]	chr9:111117592-111225668|+	23.6474	27.1515	-0.190468	0.0719157	3644.28
ENSMUSG00000030616	Sytl2	synaptotagmin-like 2 [Source:MGI Symbol;Acc:MGI:1933366]	chr7:90302252-90410719|+	7.2793	8.34136	-0.192995	0.030476	1768.1
ENSMUSG00000020890	Gucy2e	guanylate cyclase 2e [Source:MGI Symbol;Acc:MGI:105123]	chr11:69218117-69237036|-	2.43963	2.8141	-0.195504	0.0972177	1203.65
ENSMUSG00000009575	Cbx5	chromobox 5 [Source:MGI Symbol;Acc:MGI:109372]	chr15:103191544-103239816|-	7.54418	8.67089	-0.196638	0.042899	1167.51
ENSMUSG00000029191	Rfc1	replication factor C (activator 1) 1 [Source:MGI Symbol;Acc:MGI:97891]	chr5:65261850-65335670|-	19.4463	22.357	-0.196938	0.0546904	2076.04
ENSMUSG00000067297	Ifit1bl2	interferon induced protein with tetratricopeptide repeats 1B like 2 [Source:MGI Symbol;Acc:MGI:2148249]	chr19:34617049-34640743|-	89.2614	102.896	-0.198189	0.0193308	4897.87
ENSMUSG00000069622	Gm10273	predicted pseudogene 10273 [Source:MGI Symbol;Acc:MGI:3704362]	chr10:59395632-59396757|+	36.03	41.5045	-0.199199	0.0923276	635.241
ENSMUSG00000045636	Mtus1	mitochondrial tumor suppressor 1 [Source:MGI Symbol;Acc:MGI:2142572]	chr8:40990914-41133726|-	234.199	268.819	-0.200128	0.0252265	46338
ENSMUSG00000032399	Rpl4	ribosomal protein L4 [Source:MGI Symbol;Acc:MGI:1915141]	chr9:64173375-64178666|+	68.4169	78.9711	-0.200285	0.0475451	3410.41
ENSMUSG00000030029	Lrig1	leucine-rich repeats and immunoglobulin-like domains 1 [Source:MGI Symbol;Acc:MGI:107935]	chr6:94604529-94700158|-	7.4509	8.59226	-0.201174	0.065621	1184.65
ENSMUSG00000018395	Kif3a	kinesin family member 3A [Source:MGI Symbol;Acc:MGI:107689]	chr11:53567379-53601967|+	12.8269	14.7964	-0.20163	0.0425637	1005.39
ENSMUSG00000047554	Tmem41b	transmembrane protein 41B [Source:MGI Symbol;Acc:MGI:1289225]	chr7:109972187-109986929|-	19.8012	22.8361	-0.202319	0.0340501	2310.07
ENSMUSG00000030726	Pold3	polymerase (DNA-directed), delta 3, accessory subunit [Source:MGI Symbol;Acc:MGI:1915217]	chr7:100082111-100121565|-	70.3638	81.3679	-0.202703	0.0868204	5208.66
ENSMUSG00000021282	Eif5	eukaryotic translation initiation factor 5 [Source:MGI Symbol;Acc:MGI:95309]	chr12:111538016-111546752|+	37.8871	43.7023	-0.202787	0.00181369	5108.24
ENSMUSG00000040455	Usp45	ubiquitin specific petidase 45 [Source:MGI Symbol;Acc:MGI:101850]	chr4:21767156-21837872|+	6.74582	7.78718	-0.202945	0.0910674	775.018
ENSMUSG00000051391	Ywhag	tyrosine 3-monooxygenase/tryptophan 5-monooxygenase activation protein, gamma polypeptide [Source:MGI Symbol;Acc:MGI:108109]	chr5:135908409-135934616|-	88.5698	102.186	-0.203433	0.00516717	8791.36
ENSMUSG00000032560	Dnajc13	DnaJ heat shock protein family (Hsp40) member C13 [Source:MGI Symbol;Acc:MGI:2676368]	chr9:104151282-104262930|-	14.4708	16.6823	-0.203525	0.0540424	4143.63
ENSMUSG00000025885	Myo5b	myosin VB [Source:MGI Symbol;Acc:MGI:106598]	chr18:74440936-74771493|+	32.6455	37.6843	-0.203802	0.0304184	9035.05
ENSMUSG00000079112	Fam90a1a	family with sequence similarity 90, member A1A [Source:MGI Symbol;Acc:MGI:2142877]	chr8:21958714-21964303|+	84.4973	97.5526	-0.204387	0.0291067	2288.55
ENSMUSG00000039770	Ypel5	yippee-like 5 (Drosophila) [Source:MGI Symbol;Acc:MGI:1916937]	chr17:72836704-72851195|+	122.667	141.69	-0.204588	0.0232845	5298.09
ENSMUSG00000104614	Fbxw27	F-box and WD-40 domain protein 27 [Source:MGI Symbol;Acc:MGI:1924248]	chr9:109766045-109790670|-	21.1214	24.4548	-0.204968	0.0963431	1139.38
ENSMUSG00000029592	Usp30	ubiquitin specific peptidase 30 [Source:MGI Symbol;Acc:MGI:2140991]	chr5:114065461-114124720|+	25.3447	29.3079	-0.205069	0.0433416	3777.9
ENSMUSG00000032458	Copb2	coatomer protein complex, subunit beta 2 (beta prime) [Source:MGI Symbol;Acc:MGI:1354962]	chr9:98563721-98588382|+	19.4981	22.5507	-0.205556	0.0105534	2516.97
ENSMUSG00000045962	Wnk1	WNK lysine deficient protein kinase 1 [Source:MGI Symbol;Acc:MGI:2442092]	chr6:119923969-120038672|-	36.9989	42.7909	-0.205779	0.0719107	16026.5
ENSMUSG00000047388	Atmin	ATM interactor [Source:MGI Symbol;Acc:MGI:2682328]	chr8:116943393-116960445|+	57.1339	66.1696	-0.207937	0.0254677	4978.39
ENSMUSG00000025261	Huwe1	HECT, UBA and WWE domain containing 1 [Source:MGI Symbol;Acc:MGI:1926884]	chrX:151800807-151935417|+	16.83	19.4904	-0.209068	0.063132	7307.91
ENSMUSG00000026083	Eif5b	eukaryotic translation initiation factor 5B [Source:MGI Symbol;Acc:MGI:2441772]	chr1:37998010-38055579|+	58.1283	67.3167	-0.209166	0.035205	13348.6
ENSMUSG00000036499	Eea1	early endosome antigen 1 [Source:MGI Symbol;Acc:MGI:2442192]	chr10:95940650-96045518|+	22.9097	26.5299	-0.209665	0.0730828	4019.89
ENSMUSG00000029833	Trim24	tripartite motif-containing 24 [Source:MGI Symbol;Acc:MGI:109275]	chr6:37870811-37966296|+	33.8117	39.1848	-0.209886	0.0100643	5679.42
ENSMUSG00000114133	AC153134.1	NA	chr13:96079216-96081376|-	34.3547	39.827	-0.210564	0.0471274	1220.23
ENSMUSG00000029830	Svopl	SV2 related protein homolog (rat)-like [Source:MGI Symbol;Acc:MGI:2444335]	chr6:37983739-38046996|-	6.54853	7.60926	-0.211245	0.0840638	834.916
ENSMUSG00000036752	Tubb4b	tubulin, beta 4B class IVB [Source:MGI Symbol;Acc:MGI:1915472]	chr2:25222160-25224702|-	92.4592	107.215	-0.211547	0.0247898	5458.15
ENSMUSG00000030287	Itpr2	inositol 1,4,5-triphosphate receptor 2 [Source:MGI Symbol;Acc:MGI:99418]	chr6:146108299-146502223|-	8.302	9.63968	-0.212165	0.0175463	2212.22
ENSMUSG00000039473	Ubn1	ubinuclein 1 [Source:MGI Symbol;Acc:MGI:1891307]	chr16:5050068-5086285|+	18.9545	22.0473	-0.213707	0.0964681	2405.06
ENSMUSG00000041870	Ankrd13a	ankyrin repeat domain 13a [Source:MGI Symbol;Acc:MGI:1915670]	chr5:114774677-114806200|+	19.9877	23.1809	-0.213817	0.0562168	2883.11
ENSMUSG00000032512	Wdr48	WD repeat domain 48 [Source:MGI Symbol;Acc:MGI:1914811]	chr9:119894878-119926587|+	7.90053	9.18628	-0.214201	0.0434447	1166.93
ENSMUSG00000019969	Psen1	presenilin 1 [Source:MGI Symbol;Acc:MGI:1202717]	chr12:83688152-83735199|+	36.4791	42.428	-0.21468	0.0607865	3535.27
ENSMUSG00000038546	Ranbp9	RAN binding protein 9 [Source:MGI Symbol;Acc:MGI:1928741]	chr13:43402675-43481282|-	93.9086	109.113	-0.214788	0.0369104	8849.19
ENSMUSG00000034154	Ino80	INO80 complex subunit [Source:MGI Symbol;Acc:MGI:1915392]	chr2:119373042-119477687|-	9.32978	10.864	-0.215125	0.0854563	1395.15
ENSMUSG00000093661	Eif4e3	eukaryotic translation initiation factor 4E member 3 [Source:MGI Symbol;Acc:MGI:1914142]	chr6:99625135-99666771|-	90.9806	106.333	-0.217614	0.0233523	5076.77
ENSMUSG00000037210	Fam193a	family with sequence similarity 193, member A [Source:MGI Symbol;Acc:MGI:2447768]	chr5:34369933-34486456|+	62.9146	73.3437	-0.217716	0.03544	7992.29
ENSMUSG00000025235	Bbs4	Bardet-Biedl syndrome 4 (human) [Source:MGI Symbol;Acc:MGI:2143311]	chr9:59321990-59353508|-	16.15	18.9288	-0.219854	0.0929392	2042.47
ENSMUSG00000032202	Rab27a	RAB27A, member RAS oncogene family [Source:MGI Symbol;Acc:MGI:1861441]	chr9:73044854-73097629|+	19.9944	23.3784	-0.221171	0.0679677	1328.52
ENSMUSG00000024122	Pdpk1	3-phosphoinositide dependent protein kinase 1 [Source:MGI Symbol;Acc:MGI:1338068]	chr17:24073680-24150924|-	23.099	26.9529	-0.221231	0.078844	4328.43
ENSMUSG00000000827	Tpd52l2	tumor protein D52-like 2 [Source:MGI Symbol;Acc:MGI:1913564]	chr2:181497142-181517966|+	16.9155	19.7684	-0.221533	0.0236416	1901.06
ENSMUSG00000070034	Sp110	Sp110 nuclear body protein [Source:MGI Symbol;Acc:MGI:1923364]	chr1:85576899-85598817|-	38.4296	44.9748	-0.221656	0.0209429	4026.15
ENSMUSG00000028649	Macf1	microtubule-actin crosslinking factor 1 [Source:MGI Symbol;Acc:MGI:108559]	chr4:123349633-123684360|-	3.6518	4.27064	-0.222401	0.0259816	2230.73
ENSMUSG00000058624	Gda	guanine deaminase [Source:MGI Symbol;Acc:MGI:95678]	chr19:21391307-21473445|-	22.5258	26.3574	-0.222625	0.0394524	2235
ENSMUSG00000024589	Nedd4l	neural precursor cell expressed, developmentally down-regulated gene 4-like [Source:MGI Symbol;Acc:MGI:1933754]	chr18:64887756-65217826|+	13.8777	16.292	-0.223419	0.0298753	2207.15
ENSMUSG00000040818	Dennd6a	DENN/MADD domain containing 6A [Source:MGI Symbol;Acc:MGI:2442980]	chr14:26579561-26634322|+	26.9669	31.5592	-0.223834	0.0188398	3592.66
ENSMUSG00000024096	Ralbp1	ralA binding protein 1 [Source:MGI Symbol;Acc:MGI:108466]	chr17:65848433-65885755|-	216.53	253.616	-0.223878	0.0344008	14908.5
ENSMUSG00000022974	Paxbp1	PAX3 and PAX7 binding protein 1 [Source:MGI Symbol;Acc:MGI:1914617]	chr16:91014037-91044543|-	3.5829	4.19139	-0.224708	0.0741501	409.441
ENSMUSG00000006304	Arpc2	actin related protein 2/3 complex, subunit 2 [Source:MGI Symbol;Acc:MGI:1923959]	chr1:74236084-74268209|+	49.3984	57.9435	-0.225128	0.0642148	1716.25
ENSMUSG00000027312	Atrn	attractin [Source:MGI Symbol;Acc:MGI:1341628]	chr2:130906495-131030333|+	2.5803	3.03201	-0.225489	0.0142982	1496.41
ENSMUSG00000034751	Mast4	microtubule associated serine/threonine kinase family member 4 [Source:MGI Symbol;Acc:MGI:1918885]	chr13:102732486-103334497|-	4.2359	4.95327	-0.225547	0.0506632	2628.42
ENSMUSG00000030060	Hmces	5-hydroxymethylcytosine (hmC) binding, ES cell specific [Source:MGI Symbol;Acc:MGI:1914053]	chr6:87913935-87936629|+	36.2884	42.5101	-0.225579	0.08661	1389.37
ENSMUSG00000033276	Stk36	serine/threonine kinase 36 [Source:MGI Symbol;Acc:MGI:1920831]	chr1:74601445-74636894|+	34.4305	40.1835	-0.225689	0.0290833	4365.19
ENSMUSG00000027236	Eif3j1	eukaryotic translation initiation factor 3, subunit J1 [Source:MGI Symbol;Acc:MGI:1925905]	chr2:122028546-122056598|+	17.5617	20.5684	-0.226001	0.0399455	1853.41
ENSMUSG00000021048	Mthfd1	methylenetetrahydrofolate dehydrogenase (NADP+ dependent), methenyltetrahydrofolate cyclohydrolase, formyltetrahydrofolate synthase [Source:MGI Symbol;Acc:MGI:1342005]	chr12:76255298-76319803|+	6.5917	7.73988	-0.226697	0.0748403	768.587
ENSMUSG00000030884	Uqcrc2	ubiquinol cytochrome c reductase core protein 2 [Source:MGI Symbol;Acc:MGI:1914253]	chr7:120635176-120659524|+	11.8607	13.9231	-0.227098	0.0717061	817.287
ENSMUSG00000019866	Aim1	absent in melanoma 1 [Source:MGI Symbol;Acc:MGI:109544]	chr10:43950636-44148853|-	9.73343	11.4194	-0.227448	0.0601777	1613.61
ENSMUSG00000031065	Cdk16	cyclin-dependent kinase 16 [Source:MGI Symbol;Acc:MGI:97516]	chrX:20687954-20699880|+	34.8101	40.7904	-0.227779	0.0608518	2449.54
ENSMUSG00000078812	Eif5a	eukaryotic translation initiation factor 5A [Source:MGI Symbol;Acc:MGI:106248]	chr11:69916714-69921958|-	59.9078	70.398	-0.228075	0.0282528	2315.55
ENSMUSG00000031154	Otud5	OTU domain containing 5 [Source:MGI Symbol;Acc:MGI:1859615]	chrX:7841364-7876626|+	14.9963	17.6722	-0.228421	0.0569617	1687.82
ENSMUSG00000068921	Dap3	death associated protein 3 [Source:MGI Symbol;Acc:MGI:1929538]	chr3:88920803-88951181|-	5.04709	5.93868	-0.230315	0.0605944	806.242
ENSMUSG00000028591	Pramef12	PRAME family member 12 [Source:MGI Symbol;Acc:MGI:1924882]	chr4:144391674-144408464|-	274.25	323.976	-0.23121	0.0295366	13329.3
ENSMUSG00000026924	Sec16a	SEC16 homolog A, endoplasmic reticulum export factor [Source:MGI Symbol;Acc:MGI:2139207]	chr2:26409431-26445216|-	37.9927	44.6223	-0.231707	0.0153843	6957.12
ENSMUSG00000026849	Tor1a	torsin family 1, member A (torsin A) [Source:MGI Symbol;Acc:MGI:1353568]	chr2:30960627-30967933|-	31.127	36.72	-0.231908	0.0906685	1502.68
ENSMUSG00000009470	Tnpo1	transportin 1 [Source:MGI Symbol;Acc:MGI:2681523]	chr13:98839019-98926384|-	66.5071	78.7448	-0.232511	0.0145082	11008.7
ENSMUSG00000056158	Car10	carbonic anhydrase 10 [Source:MGI Symbol;Acc:MGI:1919855]	chr11:93098028-93601749|+	6.77763	7.99537	-0.233464	0.0439092	809.693
ENSMUSG00000018548	Trim37	tripartite motif-containing 37 [Source:MGI Symbol;Acc:MGI:2153072]	chr11:87127077-87220683|+	5.41941	6.40246	-0.234362	0.0974384	672.548
ENSMUSG00000021203	Otub2	OTU domain, ubiquitin aldehyde binding 2 [Source:MGI Symbol;Acc:MGI:1915399]	chr12:103388682-103406350|+	5.25127	6.20389	-0.234471	0.0752043	695.944
ENSMUSG00000033228	Scaf11	SR-related CTD-associated factor 11 [Source:MGI Symbol;Acc:MGI:1919443]	chr15:96411698-96460843|-	20.3043	23.9834	-0.235516	0.0946719	2848.61
ENSMUSG00000036550	Cnot1	CCR4-NOT transcription complex, subunit 1 [Source:MGI Symbol;Acc:MGI:2442402]	chr8:95719451-95807464|-	10.4602	12.3407	-0.235886	0.00822093	5547.08
ENSMUSG00000000214	Th	tyrosine hydroxylase [Source:MGI Symbol;Acc:MGI:98735]	chr7:142892752-142931128|-	16.803	19.9185	-0.235895	0.0571037	906.313
ENSMUSG00000058748	Zfp958	zinc finger protein 958 [Source:MGI Symbol;Acc:MGI:2385298]	chr8:4613167-4630231|+	20.7612	24.5273	-0.236648	0.0443065	878.017
ENSMUSG00000001525	Tubb5	tubulin, beta 5 class I [Source:MGI Symbol;Acc:MGI:107812]	chr17:35833921-35838306|-	7.51453	8.88344	-0.236838	0.0651806	842.056
ENSMUSG00000066036	Ubr4	ubiquitin protein ligase E3 component n-recognin 4 [Source:MGI Symbol;Acc:MGI:1916366]	chr4:139352609-139489588|+	2.66064	3.14479	-0.237794	0.088372	1650.55
ENSMUSG00000028706	Nsun4	NOL1/NOP2/Sun domain family, member 4 [Source:MGI Symbol;Acc:MGI:1919431]	chr4:116032842-116053876|-	12.6157	14.9544	-0.238083	0.0255078	1622.93
ENSMUSG00000066440	Zfyve26	zinc finger, FYVE domain containing 26 [Source:MGI Symbol;Acc:MGI:1924767]	chr12:79232346-79296304|-	2.68988	3.17642	-0.239149	0.082642	849.526
ENSMUSG00000034312	Iqsec1	IQ motif and Sec7 domain 1 [Source:MGI Symbol;Acc:MGI:1196356]	chr6:90656088-90988685|-	6.03415	7.15201	-0.239399	0.0742666	1319.19
ENSMUSG00000007458	M6pr	mannose-6-phosphate receptor, cation dependent [Source:MGI Symbol;Acc:MGI:96904]	chr6:122308720-122317680|+	4.89103	5.78016	-0.239501	0.092885	446.52
ENSMUSG00000042354	Gnl3	guanine nucleotide binding protein-like 3 (nucleolar) [Source:MGI Symbol;Acc:MGI:1353651]	chr14:31012434-31019089|-	22.0198	26.1079	-0.240881	0.0337216	764.141
ENSMUSG00000021037	Ahsa1	AHA1, activator of heat shock protein ATPase 1 [Source:MGI Symbol;Acc:MGI:2387603]	chr12:87266479-87273998|+	27.8169	33.0168	-0.241079	0.00256296	1819.6
ENSMUSG00000021012	Zc3h14	zinc finger CCCH type containing 14 [Source:MGI Symbol;Acc:MGI:1919824]	chr12:98746964-98787753|+	10.8444	12.8349	-0.241624	0.0832714	1723.44
ENSMUSG00000037355	Uvssa	UV stimulated scaffold protein A [Source:MGI Symbol;Acc:MGI:1918351]	chr5:33378549-33419754|+	5.27279	6.25516	-0.242323	0.0494025	774.642
ENSMUSG00000020652	Cenpo	centromere protein O [Source:MGI Symbol;Acc:MGI:1923800]	chr12:4196004-4234294|-	9.94125	11.8308	-0.242819	0.0384119	1530.8
ENSMUSG00000044149	Nkrf	NF-kappaB repressing factor [Source:MGI Symbol;Acc:MGI:1924536]	chrX:36887540-36902899|-	11.0351	13.1148	-0.243213	0.0699627	839.134
ENSMUSG00000046671	Mtfr1l	mitochondrial fission regulator 1-like [Source:MGI Symbol;Acc:MGI:1924074]	chr4:134525550-134535387|-	8.43173	10.0344	-0.244108	0.0171872	983.565
ENSMUSG00000020745	Pafah1b1	platelet-activating factor acetylhydrolase, isoform 1b, subunit 1 [Source:MGI Symbol;Acc:MGI:109520]	chr11:74673949-74724670|-	17.0595	20.1997	-0.244282	0.0193308	3130.85
ENSMUSG00000001168	Oas1h	2'-5' oligoadenylate synthetase 1H [Source:MGI Symbol;Acc:MGI:2180853]	chr5:120861421-120873506|+	61.8441	73.3523	-0.24593	0.0304634	2773.42
ENSMUSG00000018362	Kpna2	karyopherin (importin) alpha 2 [Source:MGI Symbol;Acc:MGI:103561]	chr11:106988629-106999541|-	283.55	337.191	-0.246096	0.0145014	14425.7
ENSMUSG00000058407	Txndc9	thioredoxin domain containing 9 [Source:MGI Symbol;Acc:MGI:2138153]	chr1:37985189-37997893|-	8.17299	9.77873	-0.246564	0.0810276	1745.7
ENSMUSG00000044147	Arf6	ADP-ribosylation factor 6 [Source:MGI Symbol;Acc:MGI:99435]	chr12:69372150-69373783|+	16.7268	19.9182	-0.246605	0.087974	573.468
ENSMUSG00000063358	Mapk1	mitogen-activated protein kinase 1 [Source:MGI Symbol;Acc:MGI:1346858]	chr16:16983382-17047453|+	12.0451	14.3341	-0.247295	0.00179682	1846.66
ENSMUSG00000047534	Mis18bp1	MIS18 binding protein 1 [Source:MGI Symbol;Acc:MGI:2145099]	chr12:65132734-65172604|-	11.494	13.6641	-0.248188	0.0528806	1366.84
ENSMUSG00000042148	Cox10	cytochrome c oxidase assembly protein 10 [Source:MGI Symbol;Acc:MGI:1917633]	chr11:63962627-64079468|-	41.5317	49.5855	-0.24837	0.0642148	2230.66
ENSMUSG00000028248	Pnisr	PNN interacting serine/arginine-rich [Source:MGI Symbol;Acc:MGI:1913875]	chr4:21847583-21876475|+	11.7283	14.0073	-0.248522	0.05918	2119.46
ENSMUSG00000041417	Pik3r1	phosphatidylinositol 3-kinase, regulatory subunit, polypeptide 1 (p85 alpha) [Source:MGI Symbol;Acc:MGI:97583]	chr13:101680563-101768217|-	28.6724	34.2024	-0.249022	0.0920831	5350.86
ENSMUSG00000028647	Mycbp	MYC binding protein [Source:MGI Symbol;Acc:MGI:1891750]	chr4:123904832-123912269|+	18.9796	22.5956	-0.250242	0.0996504	1023.17
ENSMUSG00000022518	4930562C15Rik	RIKEN cDNA 4930562C15 gene [Source:MGI Symbol;Acc:MGI:1926059]	chr16:4835416-4867691|+	10.0912	12.0904	-0.250931	0.0369298	1115.91
ENSMUSG00000021039	Snw1	SNW domain containing 1 [Source:MGI Symbol;Acc:MGI:1913604]	chr12:87449075-87472274|-	8.85345	10.59	-0.252368	0.0411775	1009.83
ENSMUSG00000029030	Tprgl	transformation related protein 63 regulated like [Source:MGI Symbol;Acc:MGI:1915058]	chr4:154157485-154160666|-	16.0869	19.2435	-0.252591	0.0183149	618.451
ENSMUSG00000020121	Srgap1	SLIT-ROBO Rho GTPase activating protein 1 [Source:MGI Symbol;Acc:MGI:2152936]	chr10:121780991-122047315|-	4.04509	4.84071	-0.25276	0.0535403	646.575
ENSMUSG00000021973	Micu2	mitochondrial calcium uptake 2 [Source:MGI Symbol;Acc:MGI:1915764]	chr14:57916280-57999262|-	20.6023	24.7509	-0.25392	0.098639	905.204
ENSMUSG00000094724	Rnaset2b	ribonuclease T2B [Source:MGI Symbol;Acc:MGI:3702087]	chr17:6978860-7011299|+	25.0455	29.9662	-0.254185	0.016155	2646.3
ENSMUSG00000052337	Immt	inner membrane protein, mitochondrial [Source:MGI Symbol;Acc:MGI:1923864]	chr6:71831331-71877388|+	8.75323	10.4542	-0.254411	0.00602321	1857.44
ENSMUSG00000021065	Fut8	fucosyltransferase 8 [Source:MGI Symbol;Acc:MGI:1858901]	chr12:77238125-77476338|+	3.61436	4.33351	-0.255082	0.0811726	757.745
ENSMUSG00000024180	Tmem8	transmembrane protein 8 (five membrane-spanning domains) [Source:MGI Symbol;Acc:MGI:1926283]	chr17:26113316-26123254|+	12.3948	14.8649	-0.255121	0.0461807	893.026
ENSMUSG00000030583	Sipa1l3	signal-induced proliferation-associated 1 like 3 [Source:MGI Symbol;Acc:MGI:1921456]	chr7:29320372-29518641|-	5.32603	6.36961	-0.255236	0.00388156	1595.23
ENSMUSG00000006941	Eif1b	eukaryotic translation initiation factor 1B [Source:MGI Symbol;Acc:MGI:1916219]	chr9:120492232-120495330|+	31.899	38.1744	-0.255601	0.0841906	1183.67
ENSMUSG00000031626	Sorbs2	sorbin and SH3 domain containing 2 [Source:MGI Symbol;Acc:MGI:1924574]	chr8:45507788-45827906|+	5.5728	6.66239	-0.256332	0.0216039	2816.93
ENSMUSG00000028677	Rnf220	ring finger protein 220 [Source:MGI Symbol;Acc:MGI:1913993]	chr4:117271463-117497052|-	32.4694	38.8463	-0.256458	0.00767883	5083.95
ENSMUSG00000013822	Elof1	ELF1 homolog, elongation factor 1 [Source:MGI Symbol;Acc:MGI:1913376]	chr9:22112989-22117172|-	19.7414	23.6718	-0.256742	0.0479928	1023.77
ENSMUSG00000073721	Gm13125	predicted gene 13125 [Source:MGI Symbol;Acc:MGI:3712553]	chr4:144372760-144377933|-	37.3225	44.8231	-0.256978	0.00946672	1500.51
ENSMUSG00000055850	Rnf181	ring finger protein 181 [Source:MGI Symbol;Acc:MGI:1913760]	chr6:72359714-72366956|-	15.2357	18.2466	-0.257108	0.0987772	987.912
ENSMUSG00000030269	Mtmr14	myotubularin related protein 14 [Source:MGI Symbol;Acc:MGI:1916075]	chr6:113237843-113281392|+	137.927	164.783	-0.257796	0.00237426	9713.09
ENSMUSG00000024583	Txnl1	thioredoxin-like 1 [Source:MGI Symbol;Acc:MGI:1860078]	chr18:63662801-63692359|-	15.4571	18.5211	-0.258199	0.0813788	770.103
ENSMUSG00000051000	Fam160a1	family with sequence similarity 160, member A1 [Source:MGI Symbol;Acc:MGI:2444746]	chr3:85660061-85817291|-	67.4928	81.1784	-0.258229	0.0185188	6890.38
ENSMUSG00000025133	Ints4	integrator complex subunit 4 [Source:MGI Symbol;Acc:MGI:1917164]	chr7:97480956-97541395|+	8.90039	10.6753	-0.25824	0.010252	1391.89
ENSMUSG00000032329	Hmg20a	high mobility group 20A [Source:MGI Symbol;Acc:MGI:1914117]	chr9:56418609-56496936|+	10.7475	12.9119	-0.258504	0.00376615	2139.03
ENSMUSG00000038457	Tmem255b	transmembrane protein 255B [Source:MGI Symbol;Acc:MGI:2685533]	chr8:13435189-13468473|+	15.9311	19.1154	-0.258817	0.0840638	686.733
ENSMUSG00000042477	Tfap2e	transcription factor AP-2, epsilon [Source:MGI Symbol;Acc:MGI:2679630]	chr4:126716006-126736240|-	77.5134	92.9065	-0.258947	0.0559522	3091.07
ENSMUSG00000030867	Plk1	polo-like kinase 1 [Source:MGI Symbol;Acc:MGI:97621]	chr7:122159439-122169873|+	40.185	48.1825	-0.260236	0.01229	2071.07
ENSMUSG00000003437	Paf1	Paf1, RNA polymerase II complex component [Source:MGI Symbol;Acc:MGI:1923988]	chr7:28392951-28399388|+	7.20993	8.67109	-0.262343	0.0421235	664.354
ENSMUSG00000047921	Trappc9	trafficking protein particle complex 9 [Source:MGI Symbol;Acc:MGI:1923760]	chr15:72589621-73061204|-	4.93148	5.936	-0.263465	0.0972678	559.197
ENSMUSG00000033773	Rpap2	RNA polymerase II associated protein 2 [Source:MGI Symbol;Acc:MGI:2141142]	chr5:107597373-107661838|+	34.1183	41.043	-0.264348	0.0252265	2741.45
ENSMUSG00000028180	Zranb2	zinc finger, RAN-binding domain containing 2 [Source:MGI Symbol;Acc:MGI:1858211]	chr3:157534160-157548410|+	7.43604	8.98797	-0.264425	0.07105	864.836
ENSMUSG00000013701	Timm23	translocase of inner mitochondrial membrane 23 [Source:MGI Symbol;Acc:MGI:1858317]	chr14:32180162-32201898|-	34.9213	42.1167	-0.26467	0.0201855	1064.87
ENSMUSG00000005533	Igf1r	insulin-like growth factor I receptor [Source:MGI Symbol;Acc:MGI:96433]	chr7:67952827-68233668|+	1.43405	1.72769	-0.264749	0.05918	563.761
ENSMUSG00000071037	Camkmt	calmodulin-lysine N-methyltransferase [Source:MGI Symbol;Acc:MGI:1920832]	chr17:85090726-85458139|+	38.1021	45.9666	-0.264799	0.033906	725.61
ENSMUSG00000046262	C87977	expressed sequence C87977 [Source:MGI Symbol;Acc:MGI:2140708]	chr4:144206775-144213318|-	128.355	154.749	-0.265364	0.00429197	8963.96
ENSMUSG00000066878	Gm10184	predicted pseudogene 10184 [Source:MGI Symbol;Acc:MGI:3704480]	chr17:89908511-89910449|-	109.635	132.039	-0.265423	0.0292219	4126.11
ENSMUSG00000079215	Zfp664	zinc finger protein 664 [Source:MGI Symbol;Acc:MGI:2442505]	chr5:124862691-124902693|+	35.0375	42.0523	-0.266103	0.0949058	6005.88
ENSMUSG00000021713	Ppwd1	peptidylprolyl isomerase domain and WD repeat containing 1 [Source:MGI Symbol;Acc:MGI:2443069]	chr13:104205121-104228844|-	24.2715	29.2939	-0.266638	0.0260289	1205.56
ENSMUSG00000026175	Vil1	villin 1 [Source:MGI Symbol;Acc:MGI:98930]	chr1:74409376-74435559|+	17.4473	21.0971	-0.266962	0.0451432	1543.86
ENSMUSG00000032624	Eml4	echinoderm microtubule associated protein like 4 [Source:MGI Symbol;Acc:MGI:1926048]	chr17:83350931-83480361|+	16.0093	19.3251	-0.267295	0.0089202	1696.37
ENSMUSG00000020170	Frs2	fibroblast growth factor receptor substrate 2 [Source:MGI Symbol;Acc:MGI:1100860]	chr10:117069427-117148534|-	3.94687	4.7806	-0.267454	0.0436345	609.084
ENSMUSG00000020435	Osbp2	oxysterol binding protein 2 [Source:MGI Symbol;Acc:MGI:1921559]	chr11:3703731-3863903|-	8.75211	10.6128	-0.267471	0.0613822	1133.62
ENSMUSG00000022793	B4galt4	UDP-Gal:betaGlcNAc beta 1,4-galactosyltransferase, polypeptide 4 [Source:MGI Symbol;Acc:MGI:1928387]	chr16:38742264-38769049|+	47.7404	57.7827	-0.267956	0.0842376	3252.6
ENSMUSG00000039238	Zfp750	zinc finger protein 750 [Source:MGI Symbol;Acc:MGI:2442210]	chr11:121510978-121519333|-	143.049	173.152	-0.267984	0.0918704	8131.47
ENSMUSG00000022360	Atad2	ATPase family, AAA domain containing 2 [Source:MGI Symbol;Acc:MGI:1917722]	chr15:58094047-58135082|-	10.8467	13.108	-0.268175	0.0304184	1192.91
ENSMUSG00000002015	Bcap31	B cell receptor associated protein 31 [Source:MGI Symbol;Acc:MGI:1350933]	chrX:73686178-73716175|-	24.0229	29.1129	-0.26859	0.0804771	724.713
ENSMUSG00000033952	Aspm	asp (abnormal spindle)-like, microcephaly associated (Drosophila) [Source:MGI Symbol;Acc:MGI:1334448]	chr1:139454772-139494091|+	57.7532	70.1477	-0.268622	0.0107892	15125
ENSMUSG00000020696	Rffl	ring finger and FYVE like domain containing protein [Source:MGI Symbol;Acc:MGI:1914588]	chr11:82802449-82871210|-	6.16095	7.43683	-0.269239	0.0874872	1031.38
ENSMUSG00000026974	Zmynd19	zinc finger, MYND domain containing 19 [Source:MGI Symbol;Acc:MGI:1914437]	chr2:24949792-24962075|+	10.4337	12.6172	-0.270453	0.0140084	1113.8
ENSMUSG00000039414	Heatr5b	HEAT repeat containing 5B [Source:MGI Symbol;Acc:MGI:2444098]	chr17:78752906-78835381|-	11.1053	13.4046	-0.271398	0.038945	1747.22
ENSMUSG00000020869	Lrrc59	leucine rich repeat containing 59 [Source:MGI Symbol;Acc:MGI:2138133]	chr11:94629767-94645216|+	35.3921	42.9556	-0.27206	0.00611184	2675.74
ENSMUSG00000026615	Eprs	glutamyl-prolyl-tRNA synthetase [Source:MGI Symbol;Acc:MGI:97838]	chr1:185363044-185428360|+	6.50156	7.87769	-0.272745	0.00420664	2213.12
ENSMUSG00000095687	Rnaset2a	ribonuclease T2A [Source:MGI Symbol;Acc:MGI:1915445]	chr17:8128610-8148097|-	50.7914	61.5904	-0.273197	0.0140319	2689.15
ENSMUSG00000042790	Rnf214	ring finger protein 214 [Source:MGI Symbol;Acc:MGI:2444451]	chr9:45863425-45906911|-	6.53557	7.93344	-0.273292	0.0375826	738.54
ENSMUSG00000047352	Olfr976	olfactory receptor 976 [Source:MGI Symbol;Acc:MGI:3030810]	chr9:39954139-39961133|-	32.5029	39.4381	-0.274181	0.00934299	2166.51
ENSMUSG00000027598	Itch	itchy, E3 ubiquitin protein ligase [Source:MGI Symbol;Acc:MGI:1202301]	chr2:155133509-155226855|+	4.19845	5.10939	-0.275135	0.0929528	676.34
ENSMUSG00000025939	Ube2w	ubiquitin-conjugating enzyme E2W (putative) [Source:MGI Symbol;Acc:MGI:1914049]	chr1:16540790-16619489|-	11.6339	14.1121	-0.27567	0.0511864	1222.31
ENSMUSG00000027323	Rad51	RAD51 recombinase [Source:MGI Symbol;Acc:MGI:97890]	chr2:119112793-119147445|+	9.96878	12.1169	-0.275727	0.0210803	1476.36
ENSMUSG00000057738	Sptan1	spectrin alpha, non-erythrocytic 1 [Source:MGI Symbol;Acc:MGI:98386]	chr2:29965560-30031451|+	13.7817	16.7479	-0.275793	0.000202	4143.21
ENSMUSG00000028873	Cdca8	cell division cycle associated 8 [Source:MGI Symbol;Acc:MGI:1196274]	chr4:124918465-124939311|-	36.4892	44.4183	-0.276053	0.0185315	2999.99
ENSMUSG00000060992	Copz1	coatomer protein complex, subunit zeta 1 [Source:MGI Symbol;Acc:MGI:1929063]	chr15:103272911-103299862|+	46.8005	56.9348	-0.276209	0.00388156	1452.45
ENSMUSG00000024855	Pacs1	phosphofurin acidic cluster sorting protein 1 [Source:MGI Symbol;Acc:MGI:1277113]	chr19:5133688-5273119|-	19.2568	23.4183	-0.276475	0.0210803	1620.83
ENSMUSG00000044636	Csrnp2	cysteine-serine-rich nuclear protein 2 [Source:MGI Symbol;Acc:MGI:2386852]	chr15:100479570-100495239|-	124.44	150.782	-0.276604	0.0498391	9612.21
ENSMUSG00000059981	Taok2	TAO kinase 2 [Source:MGI Symbol;Acc:MGI:1915919]	chr7:126865678-126884703|-	3.87767	4.70814	-0.277135	0.0594743	816.252
ENSMUSG00000024998	Plce1	phospholipase C, epsilon 1 [Source:MGI Symbol;Acc:MGI:1921305]	chr19:38481109-38785030|+	8.35959	10.2006	-0.277246	0.0104946	3035.25
ENSMUSG00000063935	Zar1	zygote arrest 1 [Source:MGI Symbol;Acc:MGI:2180337]	chr5:72576806-72581254|-	18.4378	22.2742	-0.277843	0.0783226	4122.94
ENSMUSG00000026622	Nek2	NIMA (never in mitosis gene a)-related expressed kinase 2 [Source:MGI Symbol;Acc:MGI:109359]	chr1:191821444-191833050|+	19.2024	23.3455	-0.278062	0.00442197	1990.45
ENSMUSG00000026885	Ttll11	tubulin tyrosine ligase-like family, member 11 [Source:MGI Symbol;Acc:MGI:1921660]	chr2:35751241-35979913|-	9.14869	11.1624	-0.279203	0.0152677	813.286
ENSMUSG00000032869	Psmf1	proteasome (prosome, macropain) inhibitor subunit 1 [Source:MGI Symbol;Acc:MGI:1346072]	chr2:151715812-151744186|-	9.24667	11.2498	-0.279419	0.00232256	2084.49
ENSMUSG00000020783	Ncbp3	nuclear cap binding subunit 3 [Source:MGI Symbol;Acc:MGI:1914124]	chr11:73047783-73089317|+	3.0326	3.70665	-0.279446	0.0293044	1039.54
ENSMUSG00000044447	Dock5	dedicator of cytokinesis 5 [Source:MGI Symbol;Acc:MGI:2652871]	chr14:67751928-67933572|-	21.2762	25.9105	-0.28006	0.00308444	5783.47
ENSMUSG00000022614	Lmf2	lipase maturation factor 2 [Source:MGI Symbol;Acc:MGI:2146015]	chr15:89351004-89355659|-	6.28703	7.67902	-0.280161	0.0999111	473.776
ENSMUSG00000042303	Sgsm3	small G protein signaling modulator 3 [Source:MGI Symbol;Acc:MGI:1916329]	chr15:80977765-81012289|+	6.87826	8.37981	-0.280429	0.0643672	645.71
ENSMUSG00000020638	Cmpk2	cytidine monophosphate (UMP-CMP) kinase 2, mitochondrial [Source:MGI Symbol;Acc:MGI:99830]	chr12:26469204-26479837|+	7.02512	8.56583	-0.280863	0.0146749	695
ENSMUSG00000001062	Vps9d1	VPS9 domain containing 1 [Source:MGI Symbol;Acc:MGI:1914143]	chr8:123242356-123254348|-	3.45459	4.22327	-0.281284	0.0650885	423.841
ENSMUSG00000024384	Iws1	IWS1, SUPT6 interacting protein [Source:MGI Symbol;Acc:MGI:1920723]	chr18:32067741-32104328|+	7.09202	8.68374	-0.281468	0.024104	1770.09
ENSMUSG00000037242	Clic4	chloride intracellular channel 4 (mitochondrial) [Source:MGI Symbol;Acc:MGI:1352754]	chr4:135213969-135272814|-	22.0639	26.9398	-0.281502	0.0142574	3511.57
ENSMUSG00000027478	Dnmt3b	DNA methyltransferase 3B [Source:MGI Symbol;Acc:MGI:1261819]	chr2:153649450-153687730|+	4.37296	5.35371	-0.281786	0.0963657	414.993
ENSMUSG00000037253	Mex3c	mex3 RNA binding family member C [Source:MGI Symbol;Acc:MGI:2652843]	chr18:73573044-73592575|+	8.85818	10.7979	-0.281808	0.00516717	800.075
ENSMUSG00000041645	Ddx24	DEAD (Asp-Glu-Ala-Asp) box polypeptide 24 [Source:MGI Symbol;Acc:MGI:1351337]	chr12:103407982-103425830|-	5.92061	7.21527	-0.281817	0.0134597	953.536
ENSMUSG00000028542	Slc6a9	solute carrier family 6 (neurotransmitter transporter, glycine), member 9 [Source:MGI Symbol;Acc:MGI:95760]	chr4:117834506-117875198|+	16.2475	19.729	-0.281879	0.0433416	1887.53
ENSMUSG00000041577	Prelp	proline arginine-rich end leucine-rich repeat [Source:MGI Symbol;Acc:MGI:2151110]	chr1:133910304-133921414|-	13.3763	16.3138	-0.282308	0.0197313	1088.52
ENSMUSG00000028426	Rad23b	RAD23 homolog B, nucleotide excision repair protein [Source:MGI Symbol;Acc:MGI:105128]	chr4:55350043-55392237|+	37.7233	45.9784	-0.28271	0.00922626	3896.17
ENSMUSG00000031819	Emc8	ER membrane protein complex subunit 8 [Source:MGI Symbol;Acc:MGI:1343095]	chr8:120653914-120668573|-	7.55718	9.21979	-0.282971	0.0989707	1161.56
ENSMUSG00000009092	Derl3	Der1-like domain family, member 3 [Source:MGI Symbol;Acc:MGI:1917627]	chr10:75893413-75895941|+	26.341	32.3522	-0.283012	0.0676784	1028.06
ENSMUSG00000017548	Suz12	suppressor of zeste 12 homolog (Drosophila) [Source:MGI Symbol;Acc:MGI:1261758]	chr11:79993106-80034123|+	88.8526	108.306	-0.283441	0.0213807	7438.96
ENSMUSG00000029516	Cit	citron [Source:MGI Symbol;Acc:MGI:105313]	chr5:115845278-116008947|+	17.5314	21.52	-0.284431	0.0840638	5907.65
ENSMUSG00000018412	Kansl1	KAT8 regulatory NSL complex subunit 1 [Source:MGI Symbol;Acc:MGI:1923969]	chr11:104333229-104468861|-	17.0806	20.8403	-0.284589	0.0039079	3137.34
ENSMUSG00000063410	Stk24	serine/threonine kinase 24 [Source:MGI Symbol;Acc:MGI:2385007]	chr14:121286343-121379334|-	59.5621	72.7244	-0.285283	0.0620758	2737.78
ENSMUSG00000029775	Klhdc10	kelch domain containing 10 [Source:MGI Symbol;Acc:MGI:1924038]	chr6:30401868-30455179|+	2.8728	3.50966	-0.285385	0.0658119	554.231
ENSMUSG00000001052	Sec24b	Sec24 related gene family, member B (S. cerevisiae) [Source:MGI Symbol;Acc:MGI:2139764]	chr3:129982759-130061553|-	15.0384	18.4215	-0.286495	0.0573918	1888.88
ENSMUSG00000055421	Pcdh9	protocadherin 9 [Source:MGI Symbol;Acc:MGI:1306801]	chr14:93013410-93890679|-	24.0827	29.4404	-0.287127	0.0669015	2998.45
ENSMUSG00000026553	Copa	coatomer protein complex subunit alpha [Source:MGI Symbol;Acc:MGI:1334462]	chr1:172082529-172122330|+	9.66973	11.8156	-0.287451	0.0493603	1698.92
ENSMUSG00000022385	Gtse1	G two S phase expressed protein 1 [Source:MGI Symbol;Acc:MGI:1352755]	chr15:85859707-85876572|+	20.6108	25.2989	-0.287644	0.00689855	1132.31
ENSMUSG00000052026	Slc6a7	solute carrier family 6 (neurotransmitter transporter, L-proline), member 7 [Source:MGI Symbol;Acc:MGI:2147363]	chr18:60995381-61014199|-	9.19484	11.2725	-0.287755	0.0233604	800.391
ENSMUSG00000025006	Sorbs1	sorbin and SH3 domain containing 1 [Source:MGI Symbol;Acc:MGI:700014]	chr19:40295049-40402267|-	48.7718	60.0086	-0.287838	0.0384566	2880.84
ENSMUSG00000024986	Hhex	hematopoietically expressed homeobox [Source:MGI Symbol;Acc:MGI:96086]	chr19:37434810-37440731|+	25.3538	31.0957	-0.288048	0.0183439	1271.82
ENSMUSG00000040687	Madd	MAP-kinase activating death domain [Source:MGI Symbol;Acc:MGI:2444672]	chr2:91137360-91183837|-	4.26885	5.24404	-0.288227	0.0640492	1063.67
ENSMUSG00000005656	Snx6	sorting nexin 6 [Source:MGI Symbol;Acc:MGI:1919433]	chr12:54746349-54795703|-	11.907	14.6257	-0.28888	0.0498391	742.176
ENSMUSG00000028865	Cd164l2	CD164 sialomucin-like 2 [Source:MGI Symbol;Acc:MGI:1916905]	chr4:133212131-133224555|+	26.7218	32.8224	-0.288909	0.0619969	2297.39
ENSMUSG00000062373	Tmem65	transmembrane protein 65 [Source:MGI Symbol;Acc:MGI:1922118]	chr15:58782269-58823530|-	20.7482	25.5037	-0.289321	0.0182976	1388.94
ENSMUSG00000015120	Ube2i	ubiquitin-conjugating enzyme E2I [Source:MGI Symbol;Acc:MGI:107365]	chr17:25261916-25274622|-	38.9815	48.0354	-0.289876	0.0290993	3514.44
ENSMUSG00000062797	Hikeshi	heat shock protein nuclear import factor [Source:MGI Symbol;Acc:MGI:96738]	chr7:89917529-89941204|-	3.85028	4.73405	-0.290254	0.0658119	693.378
ENSMUSG00000024734	Zp1	zona pellucida glycoprotein 1 [Source:MGI Symbol;Acc:MGI:103073]	chr19:10914287-10920632|-	14.877	18.2524	-0.290299	0.0845608	6993.7
ENSMUSG00000021376	Tpmt	thiopurine methyltransferase [Source:MGI Symbol;Acc:MGI:98812]	chr13:47025170-47044737|-	13.0523	16.0496	-0.290581	0.0853526	741.693
ENSMUSG00000038240	Pdss2	prenyl (solanesyl) diphosphate synthase, subunit 2 [Source:MGI Symbol;Acc:MGI:1918615]	chr10:43221486-43464882|+	7.01398	8.64418	-0.290995	0.0302515	891.512
ENSMUSG00000029917	C130060K24Rik	RIKEN cDNA C130060K24 gene [Source:MGI Symbol;Acc:MGI:2441881]	chr6:65381105-65458150|+	8.70514	10.6957	-0.291322	0.0497143	607.584
ENSMUSG00000024853	Sf3b2	splicing factor 3b, subunit 2 [Source:MGI Symbol;Acc:MGI:2441856]	chr19:5273923-5295455|-	25.6088	31.6531	-0.291841	0.0778259	1585.21
ENSMUSG00000018428	Akap1	A kinase (PRKA) anchor protein 1 [Source:MGI Symbol;Acc:MGI:104729]	chr11:88830792-88864586|-	13.6289	16.7842	-0.292192	0.0752043	2555.67
ENSMUSG00000020380	Rad50	RAD50 double strand break repair protein [Source:MGI Symbol;Acc:MGI:109292]	chr11:53649519-53707319|-	53.5168	65.966	-0.292351	0.0310149	6949.34
ENSMUSG00000040728	Esrp1	epithelial splicing regulatory protein 1 [Source:MGI Symbol;Acc:MGI:1917326]	chr4:11331933-11386783|-	36.262	44.4832	-0.293114	0.00354853	8473.64
ENSMUSG00000034593	Myo5a	myosin VA [Source:MGI Symbol;Acc:MGI:105976]	chr9:75071015-75223688|+	7.24585	8.93157	-0.293797	0.0168567	2128.09
ENSMUSG00000026608	Kctd3	potassium channel tetramerisation domain containing 3 [Source:MGI Symbol;Acc:MGI:2444629]	chr1:188971095-189007841|-	13.7572	16.9019	-0.29386	0.010495	2102.88
ENSMUSG00000004994	Ccdc130	coiled-coil domain containing 130 [Source:MGI Symbol;Acc:MGI:1914986]	chr8:84257795-84270380|-	4.73549	5.8333	-0.294535	0.0919705	568.741
ENSMUSG00000022682	Rrn3	RRN3 RNA polymerase I transcription factor homolog (yeast) [Source:MGI Symbol;Acc:MGI:1925255]	chr16:13780699-13814840|+	14.2717	17.578	-0.294617	0.00517049	1111.2
ENSMUSG00000020737	Hn1	hematological and neurological expressed sequence 1 [Source:MGI Symbol;Acc:MGI:1096361]	chr11:115497353-115514387|-	8.46663	10.4406	-0.295304	0.0503374	625.29
ENSMUSG00000026578	Ccdc181	coiled-coil domain containing 181 [Source:MGI Symbol;Acc:MGI:1922145]	chr1:164275585-164287847|+	21.5902	26.7074	-0.295503	0.0589335	849.102
ENSMUSG00000052609	Plekhg3	pleckstrin homology domain containing, family G (with RhoGef domain) member 3 [Source:MGI Symbol;Acc:MGI:2388284]	chr12:76530891-76580488|+	8.42337	10.3571	-0.295625	0.0145014	2122.1
ENSMUSG00000072872	Rybp	RING1 and YY1 binding protein [Source:MGI Symbol;Acc:MGI:1929059]	chr6:100228565-100287485|-	18.958	23.2153	-0.295965	0.0229161	1710.08
ENSMUSG00000053510	Nrd1	nardilysin, N-arginine dibasic convertase, NRD convertase 1 [Source:MGI Symbol;Acc:MGI:1201386]	chr4:109000655-109061777|+	4.76876	5.88985	-0.296217	0.0241165	1555.31
ENSMUSG00000024176	Sox8	SRY (sex determining region Y)-box 8 [Source:MGI Symbol;Acc:MGI:98370]	chr17:25565892-25570686|-	14.6784	18.1427	-0.296381	0.0571037	1062.57
ENSMUSG00000041229	Phf8	PHD finger protein 8 [Source:MGI Symbol;Acc:MGI:2444341]	chrX:151520672-151633859|+	22.7637	28.0597	-0.29661	0.00041	3893.16
ENSMUSG00000042744	Gm15800	predicted gene 15800 [Source:MGI Symbol;Acc:MGI:3647820]	chr5:121220219-121368577|+	5.25149	6.46104	-0.296643	0.00802723	1814.79
ENSMUSG00000029765	Plxna4	plexin A4 [Source:MGI Symbol;Acc:MGI:2179061]	chr6:32144268-32588192|-	10.3793	12.7725	-0.296777	0.000321	3051.79
ENSMUSG00000022272	Myo10	myosin X [Source:MGI Symbol;Acc:MGI:107716]	chr15:25622525-25813673|+	47.211	58.3742	-0.296801	0.0331373	9176.85
ENSMUSG00000059920	4930453N24Rik	RIKEN cDNA 4930453N24 gene [Source:MGI Symbol;Acc:MGI:1914859]	chr16:64751751-64771161|-	3.81633	4.71129	-0.296987	0.0501737	568.85
ENSMUSG00000022656	Nectin3	nectin cell adhesion molecule 3 [Source:MGI Symbol;Acc:MGI:1930171]	chr16:46387706-46498525|-	7.05337	8.685	-0.297211	0.000146	2436.97
ENSMUSG00000001166	Oas1c	2'-5' oligoadenylate synthetase 1C [Source:MGI Symbol;Acc:MGI:2149633]	chr5:120800194-120812514|-	126.623	154.935	-0.297295	0.0140319	7781.1
ENSMUSG00000020272	Stk10	serine/threonine kinase 10 [Source:MGI Symbol;Acc:MGI:1099439]	chr11:32533305-32624587|+	5.77196	7.12369	-0.298024	0.0741095	546.244
ENSMUSG00000041815	Poldip3	polymerase (DNA-directed), delta interacting protein 3 [Source:MGI Symbol;Acc:MGI:1921076]	chr15:83125978-83149384|-	6.57055	8.11797	-0.298228	0.0116898	769.806
ENSMUSG00000058248	Kcnh1	potassium voltage-gated channel, subfamily H (eag-related), member 1 [Source:MGI Symbol;Acc:MGI:1341721]	chr1:192190774-192510159|+	30.7782	37.5516	-0.298517	0.0948492	6749.64
ENSMUSG00000066113	Adamtsl1	ADAMTS-like 1 [Source:MGI Symbol;Acc:MGI:1924989]	chr4:85514172-86428385|+	9.58931	11.8219	-0.298534	0.0089902	2303.98
ENSMUSG00000025917	Cops5	COP9 signalosome subunit 5 [Source:MGI Symbol;Acc:MGI:1349415]	chr1:10024601-10038168|-	11.1683	13.8258	-0.299308	0.030587	1216.39
ENSMUSG00000020708	Psmc5	protease (prosome, macropain) 26S subunit, ATPase 5 [Source:MGI Symbol;Acc:MGI:105047]	chr11:106256154-106263120|+	36.5951	45.1375	-0.299421	0.0166367	1316.83
ENSMUSG00000001774	Chordc1	cysteine and histidine-rich domain (CHORD)-containing, zinc-binding protein 1 [Source:MGI Symbol;Acc:MGI:1914167]	chr9:18292125-18317442|+	3.62711	4.48223	-0.299691	0.0468202	573.722
ENSMUSG00000046694	Fam46b	family with sequence similarity 46, member B [Source:MGI Symbol;Acc:MGI:2140500]	chr4:133480132-133487938|+	29.845	36.7626	-0.299888	0.0117617	2246.18
ENSMUSG00000017631	Abr	active BCR-related gene [Source:MGI Symbol;Acc:MGI:107771]	chr11:76416734-76622314|-	11.235	13.8719	-0.299978	0.00163321	2494.69
ENSMUSG00000044378	Slc15a5	solute carrier family 15, member 5 [Source:MGI Symbol;Acc:MGI:3607714]	chr6:137983586-138079916|-	7.97273	9.90202	-0.300773	0.0868778	576.747
ENSMUSG00000046314	Stxbp6	syntaxin binding protein 6 (amisyn) [Source:MGI Symbol;Acc:MGI:2384963]	chr12:44852484-45074709|-	7.50249	9.27695	-0.301364	0.00906105	863.874
ENSMUSG00000025613	Cct8	chaperonin containing Tcp1, subunit 8 (theta) [Source:MGI Symbol;Acc:MGI:107183]	chr16:87483326-87495873|-	14.5558	18.0018	-0.301461	0.0480435	922.091
ENSMUSG00000031403	Dkc1	dyskeratosis congenita 1, dyskerin [Source:MGI Symbol;Acc:MGI:1861727]	chrX:75095854-75109777|+	22.6285	28.2292	-0.302109	0.0277282	2279.76
ENSMUSG00000035376	Hacd2	3-hydroxyacyl-CoA dehydratase 2 [Source:MGI Symbol;Acc:MGI:1918007]	chr16:35022421-35109175|+	9.70472	11.9598	-0.302143	0.0642148	1204.22
ENSMUSG00000017861	Mybl2	myeloblastosis oncogene-like 2 [Source:MGI Symbol;Acc:MGI:101785]	chr2:163054687-163084688|+	38.9337	48.1128	-0.302267	0.000135	3942.05
ENSMUSG00000064194	Zfp936	zinc finger protein 936 [Source:MGI Symbol;Acc:MGI:3642994]	chr7:43114229-43192109|+	13.6314	16.8838	-0.30259	0.00146127	870.826
ENSMUSG00000042439	Zfp532	zinc finger protein 532 [Source:MGI Symbol;Acc:MGI:3036282]	chr18:65580230-65689443|+	11.3342	14.0643	-0.30381	0.09855	2242.06
ENSMUSG00000069729	Arid1b	AT rich interactive domain 1B (SWI-like) [Source:MGI Symbol;Acc:MGI:1926129]	chr17:4994332-5347656|+	14.1258	17.5261	-0.303975	0.0406843	3806.43
ENSMUSG00000019528	Gyg	glycogenin [Source:MGI Symbol;Acc:MGI:1351614]	chr3:20122084-20155317|-	219.95	271.625	-0.304721	0.00291296	12566.2
ENSMUSG00000027865	Gdap2	ganglioside-induced differentiation-associated-protein 2 [Source:MGI Symbol;Acc:MGI:1338001]	chr3:100162381-100206981|+	10.4493	12.9348	-0.305055	0.00513676	1110.04
ENSMUSG00000042133	Ppig	peptidyl-prolyl isomerase G (cyclophilin G) [Source:MGI Symbol;Acc:MGI:2445173]	chr2:69722545-69754012|+	52.3455	64.8901	-0.305584	0.0245277	7618.45
ENSMUSG00000027519	Rab22a	RAB22A, member RAS oncogene family [Source:MGI Symbol;Acc:MGI:105072]	chr2:173659760-173707343|+	3.5503	4.41667	-0.306571	0.0172502	517.792
ENSMUSG00000063455	D630045J12Rik	RIKEN cDNA D630045J12 gene [Source:MGI Symbol;Acc:MGI:2669829]	chr6:38123174-38254009|-	4.70421	5.81992	-0.306849	0.0110596	1849.71
ENSMUSG00000021385	Ippk	inositol 1,3,4,5,6-pentakisphosphate 2-kinase [Source:MGI Symbol;Acc:MGI:1922928]	chr13:49421249-49464573|+	28.6077	35.4278	-0.307046	9.37e-05	4084.42
ENSMUSG00000052533	Nup188	nucleoporin 188 [Source:MGI Symbol;Acc:MGI:2446190]	chr2:30286397-30344266|+	8.57137	10.6741	-0.30784	0.0183774	1605.85
ENSMUSG00000020430	Pes1	pescadillo ribosomal biogenesis factor 1 [Source:MGI Symbol;Acc:MGI:1890613]	chr11:3963975-3980004|+	11.3128	14.0486	-0.308019	0.0195845	675.804
ENSMUSG00000022214	Dcaf11	DDB1 and CUL4 associated factor 11 [Source:MGI Symbol;Acc:MGI:90168]	chr14:55560006-55570065|+	1.14182	1.41844	-0.308285	0.0682136	347.954
ENSMUSG00000066979	Bub3	BUB3 mitotic checkpoint protein [Source:MGI Symbol;Acc:MGI:1343463]	chr7:131560222-131571895|+	9.75561	12.1153	-0.308293	0.00248896	1329.77
ENSMUSG00000023960	Enpp5	ectonucleotide pyrophosphatase/phosphodiesterase 5 [Source:MGI Symbol;Acc:MGI:1933830]	chr17:44078813-44086567|+	7.74659	9.60917	-0.308659	0.0122631	1078.11
ENSMUSG00000026577	Blzf1	basic leucine zipper nuclear factor 1 [Source:MGI Symbol;Acc:MGI:1201607]	chr1:164289800-164307489|-	8.82863	11.015	-0.30876	0.0824478	918.523
ENSMUSG00000029076	Sdf4	stromal cell derived factor 4 [Source:MGI Symbol;Acc:MGI:108079]	chr4:155992872-156013610|+	3.86738	4.81249	-0.309159	0.00968215	583.771
ENSMUSG00000024870	Rab1b	RAB1B, member RAS oncogene family [Source:MGI Symbol;Acc:MGI:1923558]	chr19:5099207-5106996|-	12.2408	15.2565	-0.309641	0.0488649	390.957
ENSMUSG00000033326	Kdm4a	lysine (K)-specific demethylase 4A [Source:MGI Symbol;Acc:MGI:2446210]	chr4:118136957-118180043|-	8.66682	10.766	-0.309719	0.0226022	818.25
ENSMUSG00000048175	Asb8	ankyrin repeat and SOCS box-containing 8 [Source:MGI Symbol;Acc:MGI:1925791]	chr15:98134637-98165625|-	54.6876	68.0261	-0.310484	0.000119	2644.71
ENSMUSG00000005410	Mcm5	minichromosome maintenance complex component 5 [Source:MGI Symbol;Acc:MGI:103197]	chr8:75109569-75128439|+	5.02949	6.28435	-0.311017	0.0797233	701.037
ENSMUSG00000059956	Serpinb12	serine (or cysteine) peptidase inhibitor, clade B (ovalbumin), member 12 [Source:MGI Symbol;Acc:MGI:1919119]	chr1:106934449-106957080|+	7.99913	9.95711	-0.311301	0.0193113	485.392
ENSMUSG00000043241	Upf2	UPF2 regulator of nonsense transcripts homolog (yeast) [Source:MGI Symbol;Acc:MGI:2449307]	chr2:5951469-6056703|+	8.73123	10.9492	-0.311568	0.0651806	1043.66
ENSMUSG00000040044	Orc3	origin recognition complex, subunit 3 [Source:MGI Symbol;Acc:MGI:1354944]	chr4:34570796-34614944|-	8.31809	10.3686	-0.311963	0.00645988	1048.36
ENSMUSG00000035842	Ddx11	DEAD/H (Asp-Glu-Ala-Asp/His) box helicase 11 [Source:MGI Symbol;Acc:MGI:2443590]	chr17:66123520-66152167|+	5.82248	7.26151	-0.311979	0.0399455	930.481
ENSMUSG00000024673	Ms4a1	membrane-spanning 4-domains, subfamily A, member 1 [Source:MGI Symbol;Acc:MGI:88321]	chr19:11249675-11266241|-	5.88173	7.32668	-0.312485	0.0357719	741.391
ENSMUSG00000032507	Fbxl2	F-box and leucine-rich repeat protein 2 [Source:MGI Symbol;Acc:MGI:1919429]	chr9:113963637-114046191|-	3.78668	4.72841	-0.312565	0.0673136	453.912
ENSMUSG00000028645	Slc2a1	solute carrier family 2 (facilitated glucose transporter), member 1 [Source:MGI Symbol;Acc:MGI:95755]	chr4:119108711-119137983|+	12.0956	15.0345	-0.313711	0.0401596	1077.52
ENSMUSG00000034543	Morc2a	microrchidia 2A [Source:MGI Symbol;Acc:MGI:1921772]	chr11:3649494-3690477|+	6.74807	8.40433	-0.313998	0.0312498	923.481
ENSMUSG00000034442	Trmt5	TRM5 tRNA methyltransferase 5 [Source:MGI Symbol;Acc:MGI:1923607]	chr12:73280011-73286710|-	6.94374	8.67874	-0.314021	0.0757782	369.348
ENSMUSG00000005774	Rfx5	regulatory factor X, 5 (influences HLA class II expression) [Source:MGI Symbol;Acc:MGI:1858421]	chr3:94954075-94961561|+	5.2423	6.52849	-0.314824	0.076339	629.806
ENSMUSG00000036106	Prr5	proline rich 5 (renal) [Source:MGI Symbol;Acc:MGI:1924714]	chr15:84669620-84703673|+	14.2847	17.8543	-0.314829	0.0854326	572.277
ENSMUSG00000001416	Cct3	chaperonin containing Tcp1, subunit 3 (gamma) [Source:MGI Symbol;Acc:MGI:104708]	chr3:88297116-88321767|+	2.44026	3.06244	-0.314838	0.0271181	697.77
ENSMUSG00000002778	Kdelr1	KDEL (Lys-Asp-Glu-Leu) endoplasmic reticulum protein retention receptor 1 [Source:MGI Symbol;Acc:MGI:1915387]	chr7:45872772-45883732|+	9.93778	12.4214	-0.315561	0.0862733	342.847
ENSMUSG00000007659	Bcl2l1	BCL2-like 1 [Source:MGI Symbol;Acc:MGI:88139]	chr2:152780668-152831728|-	9.21932	11.5565	-0.315659	0.0709485	803.809
ENSMUSG00000030286	Emc3	ER membrane protein complex subunit 3 [Source:MGI Symbol;Acc:MGI:1913337]	chr6:113514874-113531652|-	7.28899	9.11871	-0.316198	0.00852294	903.994
ENSMUSG00000009569	Mkl2	MKL/myocardin-like 2 [Source:MGI Symbol;Acc:MGI:3050795]	chr16:13256481-13417529|+	24.5576	30.7214	-0.316642	0.000353	4219.42
ENSMUSG00000109336	Samd4b	sterile alpha motif domain containing 4B [Source:MGI Symbol;Acc:MGI:2448542]	chr7:28399522-28598144|-	13.6962	17.1326	-0.31686	0.0271802	1178.96
ENSMUSG00000001855	Nup214	nucleoporin 214 [Source:MGI Symbol;Acc:MGI:1095411]	chr2:31974436-32053975|+	134.004	167.957	-0.317012	0.026993	24508.7
ENSMUSG00000032745	Gpbp1	GC-rich promoter binding protein 1 [Source:MGI Symbol;Acc:MGI:1920524]	chr13:111425680-111490111|-	166.572	208.785	-0.317299	0.00183405	12635.6
ENSMUSG00000031921	Terf2	telomeric repeat binding factor 2 [Source:MGI Symbol;Acc:MGI:1195972]	chr8:107069400-107096547|-	14.3716	17.9766	-0.317988	0.00245604	1149.32
ENSMUSG00000030868	Dctn5	dynactin 5 [Source:MGI Symbol;Acc:MGI:1891689]	chr7:122133041-122149044|+	9.13348	11.4569	-0.318064	0.079009	505.853
ENSMUSG00000028826	Tmem57	transmembrane protein 57 [Source:MGI Symbol;Acc:MGI:1913396]	chr4:134802759-134853345|-	13.9858	17.4937	-0.31842	0.00118154	2108.7
ENSMUSG00000027496	Aurka	aurora kinase A [Source:MGI Symbol;Acc:MGI:894678]	chr2:172356190-172370535|-	36.6881	45.8759	-0.318441	0.01833	1981.5
ENSMUSG00000018171	Vmp1	vacuole membrane protein 1 [Source:MGI Symbol;Acc:MGI:1923159]	chr11:86583865-86683836|-	4.44726	5.57085	-0.318708	0.0209386	590.855
ENSMUSG00000056962	Jmjd6	jumonji domain containing 6 [Source:MGI Symbol;Acc:MGI:1858910]	chr11:116837432-116843449|-	5.75516	7.21071	-0.318764	0.0346674	571.1
ENSMUSG00000020257	Wdr82	WD repeat domain containing 82 [Source:MGI Symbol;Acc:MGI:1924555]	chr9:106170928-106191139|+	22.6228	28.2893	-0.319247	0.000289	3047.02
ENSMUSG00000072082	Ccnf	cyclin F [Source:MGI Symbol;Acc:MGI:102551]	chr17:24223232-24251409|-	6.29747	7.89064	-0.319857	0.0779134	477.539
ENSMUSG00000020496	Rnf187	ring finger protein 187 [Source:MGI Symbol;Acc:MGI:1914224]	chr11:58932288-58938916|-	18.3291	23.0782	-0.320062	0.0661279	756.341
ENSMUSG00000031918	Mtmr2	myotubularin related protein 2 [Source:MGI Symbol;Acc:MGI:1924366]	chr9:13748410-13806481|+	21.8909	27.3356	-0.320673	0.00117639	1900.29
ENSMUSG00000030410	Dmwd	dystrophia myotonica-containing WD repeat motif [Source:MGI Symbol;Acc:MGI:94907]	chr7:19076227-19082776|+	10.8869	13.657	-0.321673	0.0183774	696.824
ENSMUSG00000034858	Fam214a	family with sequence similarity 214, member A [Source:MGI Symbol;Acc:MGI:2387648]	chr9:74952884-75032468|+	20.0541	25.1058	-0.322423	0.000532	2873.21
ENSMUSG00000025925	Terf1	telomeric repeat binding factor 1 [Source:MGI Symbol;Acc:MGI:109634]	chr1:15805646-15844052|+	14.5667	18.2196	-0.322603	0.0240462	1241.77
ENSMUSG00000020448	Rnf185	ring finger protein 185 [Source:MGI Symbol;Acc:MGI:1922078]	chr11:3415982-3452363|-	86.4013	108.663	-0.322902	0.000619	4898.45
ENSMUSG00000028798	Eif3i	eukaryotic translation initiation factor 3, subunit I [Source:MGI Symbol;Acc:MGI:1860763]	chr4:129591960-129600648|-	16.2404	20.4707	-0.323217	0.00998341	1026.74
ENSMUSG00000003233	Dvl3	dishevelled segment polarity protein 3 [Source:MGI Symbol;Acc:MGI:108100]	chr16:20516982-20532520|+	15.8561	19.9471	-0.323619	0.044696	1472.47
ENSMUSG00000038770	Kpna7	karyopherin alpha 7 (importin alpha 8) [Source:MGI Symbol;Acc:MGI:2141165]	chr5:144983519-145084030|-	82.0672	102.923	-0.32372	0.000893	6687.74
ENSMUSG00000095677	Dynlt1f	dynein light chain Tctex-type 1F [Source:MGI Symbol;Acc:MGI:3780996]	chr17:6648941-6655939|-	8.73698	11.0632	-0.324588	0.0875041	475.427
ENSMUSG00000061607	Mdc1	mediator of DNA damage checkpoint 1 [Source:MGI Symbol;Acc:MGI:3525201]	chr17:35841515-35859670|+	16.9388	21.3006	-0.324806	0.0208517	2413.51
ENSMUSG00000029151	Slc30a3	solute carrier family 30 (zinc transporter), member 3 [Source:MGI Symbol;Acc:MGI:1345280]	chr5:31086106-31108237|-	62.2549	78.4516	-0.325038	0.00731977	3709.47
ENSMUSG00000001105	Ift20	intraflagellar transport 20 [Source:MGI Symbol;Acc:MGI:1915585]	chr11:78536361-78541737|+	10.3267	13.0599	-0.325324	0.0662144	346.075
ENSMUSG00000034321	Exosc1	exosome component 1 [Source:MGI Symbol;Acc:MGI:1913833]	chr19:41922980-41933314|-	13.6801	17.2017	-0.326523	0.0265624	537.147
ENSMUSG00000030103	Bhlhe40	basic helix-loop-helix family, member e40 [Source:MGI Symbol;Acc:MGI:1097714]	chr6:108660629-108666925|+	8.35478	10.5685	-0.327013	0.0835967	831.65
ENSMUSG00000030000	Add2	adducin 2 (beta) [Source:MGI Symbol;Acc:MGI:87919]	chr6:86028681-86124409|+	1.90608	2.3999	-0.328882	0.0812869	371.566
ENSMUSG00000049314	Fbxw13	F-box and WD-40 domain protein 13 [Source:MGI Symbol;Acc:MGI:3505590]	chr9:109179227-109195975|-	9.67938	12.2061	-0.329609	0.0604704	1123.31
ENSMUSG00000062929	Cfl2	cofilin 2, muscle [Source:MGI Symbol;Acc:MGI:101763]	chr12:54858809-54862877|-	40.8764	51.3996	-0.329847	0.0208517	2274.46
ENSMUSG00000055150	Zfp78	zinc finger protein 78 [Source:MGI Symbol;Acc:MGI:107783]	chr7:6363280-6382605|+	5.38642	6.81017	-0.330092	0.0532358	560.814
ENSMUSG00000031839	Hsbp1	heat shock factor binding protein 1 [Source:MGI Symbol;Acc:MGI:1915446]	chr8:119344488-119348922|+	43.1833	54.4877	-0.330705	0.0308304	1552.52
ENSMUSG00000028438	Kif24	kinesin family member 24 [Source:MGI Symbol;Acc:MGI:1918345]	chr4:41390745-41464887|-	6.05905	7.64346	-0.331173	0.00103821	1134.79
ENSMUSG00000035248	Zcchc6	zinc finger, CCHC domain containing 6 [Source:MGI Symbol;Acc:MGI:2387179]	chr13:59771879-59823147|-	11.573	14.5995	-0.331252	0.00121975	1163.13
ENSMUSG00000030822	Prr14	proline rich 14 [Source:MGI Symbol;Acc:MGI:2384565]	chr7:127459611-127476759|+	6.76959	8.57094	-0.331265	0.00216733	2656.03
ENSMUSG00000020224	Llph	LLP homolog, long-term synaptic facilitation (Aplysia) [Source:MGI Symbol;Acc:MGI:1913475]	chr10:120227070-120232582|+	24.3764	30.7158	-0.331458	0.0244408	1115.36
ENSMUSG00000004540	Psg17	pregnancy specific glycoprotein 17 [Source:MGI Symbol;Acc:MGI:1347250]	chr7:18813937-18821607|-	12.6737	16.1064	-0.33221	0.0843471	561.726
ENSMUSG00000038555	Reep2	receptor accessory protein 2 [Source:MGI Symbol;Acc:MGI:2385070]	chr18:34840589-34847463|+	41.5197	52.7558	-0.332417	0.0528798	2247.64
ENSMUSG00000071359	Tbpl1	TATA box binding protein-like 1 [Source:MGI Symbol;Acc:MGI:1339946]	chr10:22703879-22731938|-	3.55068	4.50333	-0.333728	0.076339	185.173
ENSMUSG00000021707	Dhfr	dihydrofolate reductase [Source:MGI Symbol;Acc:MGI:94890]	chr13:92354783-92389053|+	2.43318	3.07154	-0.333874	0.0577102	330.541
ENSMUSG00000039206	Daglb	diacylglycerol lipase, beta [Source:MGI Symbol;Acc:MGI:2442032]	chr5:143464584-143505942|+	0.968915	1.23036	-0.333895	0.0596605	470.656
ENSMUSG00000031928	Mre11a	MRE11A homolog A, double strand break repair nuclease [Source:MGI Symbol;Acc:MGI:1100512]	chr9:14784654-14837123|+	2.75143	3.47728	-0.33405	0.0272535	356.195
ENSMUSG00000030189	Ybx3	Y box protein 3 [Source:MGI Symbol;Acc:MGI:2137670]	chr6:131364855-131388476|-	185.682	235.207	-0.334848	0.0308763	10336.5
ENSMUSG00000039148	Sart1	squamous cell carcinoma antigen recognized by T cells 1 [Source:MGI Symbol;Acc:MGI:1309453]	chr19:5377523-5388703|-	5.84215	7.42071	-0.335226	0.0285364	796.121
ENSMUSG00000038084	Opa1	OPA1, mitochondrial dynamin like GTPase [Source:MGI Symbol;Acc:MGI:1921393]	chr16:29579334-29654884|+	12.7589	16.1827	-0.335235	0.00108354	1866.85
ENSMUSG00000024260	Sap130	Sin3A associated protein [Source:MGI Symbol;Acc:MGI:1919782]	chr18:31634371-31723061|+	89.4388	113.498	-0.33548	0.0141905	6712.64
ENSMUSG00000024165	Hn1l	hematological and neurological expressed 1-like [Source:MGI Symbol;Acc:MGI:1196260]	chr17:24942156-24960636|-	46.4819	58.8764	-0.335551	3.8e-05	2957.7
ENSMUSG00000026245	Farsb	phenylalanyl-tRNA synthetase, beta subunit [Source:MGI Symbol;Acc:MGI:1346035]	chr1:78417975-78488897|-	51.6458	65.4821	-0.336389	0.00144671	2386.71
ENSMUSG00000025041	Nt5c2	5'-nucleotidase, cytosolic II [Source:MGI Symbol;Acc:MGI:2178563]	chr19:46886831-47015153|-	4.86637	6.16053	-0.336744	0.040826	526.252
ENSMUSG00000021326	Trim27	tripartite motif-containing 27 [Source:MGI Symbol;Acc:MGI:97904]	chr13:21179445-21194724|+	13.0333	16.5123	-0.337366	3.55e-05	1960.44
ENSMUSG00000026755	Arpc5l	actin related protein 2/3 complex, subunit 5-like [Source:MGI Symbol;Acc:MGI:1921442]	chr2:39005348-39015877|+	11.9176	15.0899	-0.337418	0.0158061	1173.54
ENSMUSG00000066613	Zfp932	zinc finger protein 932 [Source:MGI Symbol;Acc:MGI:1916754]	chr5:109996521-110010411|+	7.23223	9.20292	-0.339501	0.010252	497.097
ENSMUSG00000020538	Srebf1	sterol regulatory element binding transcription factor 1 [Source:MGI Symbol;Acc:MGI:107606]	chr11:60199089-60222581|-	1.94362	2.48786	-0.339519	0.0853186	587.552
ENSMUSG00000021420	Fars2	phenylalanine-tRNA synthetase 2 (mitochondrial) [Source:MGI Symbol;Acc:MGI:1917205]	chr13:36117411-36537592|+	8.68402	11.056	-0.339587	0.025149	413.387
ENSMUSG00000000751	Rpa1	replication protein A1 [Source:MGI Symbol;Acc:MGI:1915525]	chr11:75298166-75348324|-	6.15375	7.80582	-0.339597	0.00265071	998.987
ENSMUSG00000015961	Adss	adenylosuccinate synthetase, non muscle [Source:MGI Symbol;Acc:MGI:87948]	chr1:177762962-177796511|-	76.2987	97.14	-0.339644	0.0213655	8103.07
ENSMUSG00000030127	Cops7a	COP9 signalosome subunit 7A [Source:MGI Symbol;Acc:MGI:1349400]	chr6:124958413-124965538|-	12.4567	15.8136	-0.339677	0.00598493	881.165
ENSMUSG00000026260	Ndufa10	NADH dehydrogenase (ubiquinone) 1 alpha subcomplex 10 [Source:MGI Symbol;Acc:MGI:1914523]	chr1:92439010-92473860|-	10.8552	13.8116	-0.339844	0.00656737	676.407
ENSMUSG00000025144	Cenpx	centromere protein X [Source:MGI Symbol;Acc:MGI:894324]	chr11:120710942-120713738|-	25.7348	32.7658	-0.340085	0.0436345	788.252
ENSMUSG00000028848	Gpn2	GPN-loop GTPase 2 [Source:MGI Symbol;Acc:MGI:2140368]	chr4:133584362-133591735|+	24.699	31.4692	-0.340482	0.0381394	623.631
ENSMUSG00000027502	Rtfdc1	replication termination factor 2 domain containing 1 [Source:MGI Symbol;Acc:MGI:1913654]	chr2:172440556-172469908|+	10.0862	12.8281	-0.340625	0.00682712	604.164
ENSMUSG00000032352	Lrrc1	leucine rich repeat containing 1 [Source:MGI Symbol;Acc:MGI:2442313]	chr9:77430823-77544870|-	3.04356	3.86567	-0.340963	0.0345363	410.168
ENSMUSG00000029777	Gars	glycyl-tRNA synthetase [Source:MGI Symbol;Acc:MGI:2449057]	chr6:55038007-55079500|+	8.02916	10.2218	-0.341566	0.00892699	579.66
ENSMUSG00000041236	Vps41	VPS41 HOPS complex subunit [Source:MGI Symbol;Acc:MGI:1929215]	chr13:18717286-18866811|+	3.11633	3.96907	-0.342482	0.0697016	419.3
ENSMUSG00000000959	Oxa1l	oxidase assembly 1-like [Source:MGI Symbol;Acc:MGI:1916339]	chr14:54360841-54369673|+	2.98349	3.80949	-0.342517	0.0842376	302.27
ENSMUSG00000031461	Myom2	myomesin 2 [Source:MGI Symbol;Acc:MGI:1328358]	chr8:15057653-15133541|+	3.25717	4.15731	-0.342841	0.0141405	603.975
ENSMUSG00000070730	Rmdn3	regulator of microtubule dynamics 3 [Source:MGI Symbol;Acc:MGI:1915059]	chr2:119137001-119157034|-	2.74637	3.51509	-0.34293	0.058546	253.651
ENSMUSG00000037750	Fam222b	family with sequence similarity 222, member B [Source:MGI Symbol;Acc:MGI:2384939]	chr11:78094660-78156700|+	99.9923	128.112	-0.343167	0.0524248	6568.9
ENSMUSG00000021286	Zfyve21	zinc finger, FYVE domain containing 21 [Source:MGI Symbol;Acc:MGI:1915770]	chr12:111814170-111832192|+	22.6613	28.8837	-0.343178	0.000808	742.489
ENSMUSG00000025793	Hgs	HGF-regulated tyrosine kinase substrate [Source:MGI Symbol;Acc:MGI:104681]	chr11:120467635-120483984|+	7.10703	9.1002	-0.343219	0.041636	677.259
ENSMUSG00000031362	Xlr4c	X-linked lymphocyte-regulated 4C [Source:MGI Symbol;Acc:MGI:3574099]	chrX:73233688-73243130|-	18.18	23.181	-0.34332	0.00489087	918.391
ENSMUSG00000004100	Ppan	peter pan homolog (Drosophila) [Source:MGI Symbol;Acc:MGI:2178445]	chr9:20888175-20892178|+	8.31803	10.611	-0.344936	0.01677	691.352
ENSMUSG00000026159	Agfg1	ArfGAP with FG repeats 1 [Source:MGI Symbol;Acc:MGI:1333754]	chr1:82839483-82901182|+	3.25635	4.15663	-0.345825	0.0128523	608.267
ENSMUSG00000028121	Bcar3	breast cancer anti-estrogen resistance 3 [Source:MGI Symbol;Acc:MGI:1352501]	chr3:122294136-122530191|+	12.6708	16.1359	-0.347439	0.000136	2751.14
ENSMUSG00000025066	Sfr1	SWI5 dependent recombination repair 1 [Source:MGI Symbol;Acc:MGI:1915038]	chr19:47731756-47735588|+	167.269	214.484	-0.347681	0.00384854	6289.15
ENSMUSG00000009549	srp.14	signal recognition particle 14 [Source:MGI Symbol;Acc:MGI:107169]	chr2:118475850-118479711|-	18.5104	23.807	-0.347915	0.0868778	385.335
ENSMUSG00000029869	Ephb6	Eph receptor B6 [Source:MGI Symbol;Acc:MGI:1096338]	chr6:41605482-41620509|+	1.98783	2.54953	-0.349163	0.0947466	245.241
ENSMUSG00000021124	Vti1b	vesicle transport through interaction with t-SNAREs 1B [Source:MGI Symbol;Acc:MGI:1855688]	chr12:79156017-79172667|-	10.7907	13.7961	-0.349166	0.0475961	426.365
ENSMUSG00000024660	Incenp	inner centromere protein [Source:MGI Symbol;Acc:MGI:1313288]	chr19:9872297-9899533|-	33.7827	43.3186	-0.349748	0.0151861	2210.72
ENSMUSG00000026425	Srgap2	SLIT-ROBO Rho GTPase activating protein 2 [Source:MGI Symbol;Acc:MGI:109605]	chr1:131285251-131527352|-	2.70694	3.46613	-0.34989	0.0137319	698.225
ENSMUSG00000044726	Erich5	glutamate rich 5 [Source:MGI Symbol;Acc:MGI:2447772]	chr15:34453312-34473892|+	49.719	64.1142	-0.350826	0.0071313	2351.36
ENSMUSG00000028082	Sh3d19	SH3 domain protein D19 [Source:MGI Symbol;Acc:MGI:1350923]	chr3:85971109-86130526|+	8.41248	10.8379	-0.35103	0.0592375	1529.42
ENSMUSG00000031197	Vbp1	von Hippel-Lindau binding protein 1 [Source:MGI Symbol;Acc:MGI:1333804]	chrX:75514299-75534942|+	5.38157	6.86796	-0.351396	0.0253916	321.772
ENSMUSG00000021262	Evl	Ena-vasodilator stimulated phosphoprotein [Source:MGI Symbol;Acc:MGI:1194884]	chr12:108554720-108688516|+	7.23209	9.29001	-0.352661	0.045303	379.386
ENSMUSG00000027968	Larp7	La ribonucleoprotein domain family, member 7 [Source:MGI Symbol;Acc:MGI:107634]	chr3:127536714-127553349|-	24.1967	31.0235	-0.352914	0.00153059	1245.22
ENSMUSG00000091387	Gcnt4	glucosaminyl (N-acetyl) transferase 4, core 2 (beta-1,6-N-acetylglucosaminyltransferase) [Source:MGI Symbol;Acc:MGI:2684919]	chr13:96924689-96950906|+	9.31391	11.9506	-0.353759	0.0137319	3410.14
ENSMUSG00000025980	Hspd1	heat shock protein 1 (chaperonin) [Source:MGI Symbol;Acc:MGI:96242]	chr1:55077835-55088243|-	47.1491	60.6424	-0.353806	0.000146	2459.61
ENSMUSG00000021253	Tgfb3	transforming growth factor, beta 3 [Source:MGI Symbol;Acc:MGI:98727]	chr12:86056745-86079041|-	5.54368	7.11297	-0.354081	0.0207812	456.99
ENSMUSG00000041997	Tlk1	tousled-like kinase 1 [Source:MGI Symbol;Acc:MGI:2441683]	chr2:70712407-70825728|-	4.97877	6.38094	-0.354109	0.0687686	663.355
ENSMUSG00000044573	Acp1	acid phosphatase 1, soluble [Source:MGI Symbol;Acc:MGI:87881]	chr12:30893326-30911589|-	9.5046	12.1869	-0.354383	0.000986	1161.41
ENSMUSG00000026672	Optn	optineurin [Source:MGI Symbol;Acc:MGI:1918898]	chr2:5020642-5064051|-	3.32182	4.30384	-0.355567	0.0704197	294.33
ENSMUSG00000032459	Mrps22	mitochondrial ribosomal protein S22 [Source:MGI Symbol;Acc:MGI:1928137]	chr9:98588730-98601660|-	4.57766	5.8734	-0.355914	0.00116819	972.995
ENSMUSG00000063065	Mapk3	mitogen-activated protein kinase 3 [Source:MGI Symbol;Acc:MGI:1346859]	chr7:126759601-126765819|+	25.8215	33.3871	-0.356707	0.0521624	1778.24
ENSMUSG00000036461	Elf1	E74-like factor 1 [Source:MGI Symbol;Acc:MGI:107180]	chr14:79481194-79582476|+	7.64604	9.82796	-0.356765	0.0134787	740.578
ENSMUSG00000068101	Cenpm	centromere protein M [Source:MGI Symbol;Acc:MGI:1913820]	chr15:82233779-82244747|-	4.93642	6.34954	-0.35695	0.0417114	686.715
ENSMUSG00000056458	Mok	MOK protein kinase [Source:MGI Symbol;Acc:MGI:1336881]	chr12:110807798-110840939|-	9.51741	12.2587	-0.357438	0.0128115	809.987
ENSMUSG00000018293	Pfn1	profilin 1 [Source:MGI Symbol;Acc:MGI:97549]	chr11:70651850-70654644|-	33.4587	42.8716	-0.357542	0.0439346	2038.58
ENSMUSG00000020929	Eftud2	elongation factor Tu GTP binding domain containing 2 [Source:MGI Symbol;Acc:MGI:1336880]	chr11:102838473-102880985|-	3.2182	4.13785	-0.357578	0.0089694	800.531
ENSMUSG00000044308	Ubr3	ubiquitin protein ligase E3 component n-recognin 3 [Source:MGI Symbol;Acc:MGI:1861100]	chr2:69897246-70024013|+	3.9979	5.13181	-0.357594	0.000421	953.964
ENSMUSG00000039703	Nploc4	NPL4 homolog, ubiquitin recognition factor [Source:MGI Symbol;Acc:MGI:2679787]	chr11:120380370-120437708|-	10.8259	13.907	-0.357776	0.00196718	1606.05
ENSMUSG00000046679	C87436	expressed sequence C87436 [Source:MGI Symbol;Acc:MGI:2141787]	chr6:86438374-86473500|+	8.09127	10.4349	-0.357933	0.0131433	675.564
ENSMUSG00000029165	Agbl5	ATP/GTP binding protein-like 5 [Source:MGI Symbol;Acc:MGI:2441745]	chr5:30888694-30906965|+	1.90808	2.46688	-0.357959	0.058546	267.292
ENSMUSG00000046982	Tshz1	teashirt zinc finger family member 1 [Source:MGI Symbol;Acc:MGI:1346031]	chr18:84011627-84086404|-	23.1261	29.7775	-0.358744	0.0373818	2280.57
ENSMUSG00000006498	Ptbp1	polypyrimidine tract binding protein 1 [Source:MGI Symbol;Acc:MGI:97791]	chr10:79854427-79864771|+	65.3317	83.841	-0.358817	6.57e-06	5296.56
ENSMUSG00000039693	Msantd3	Myb/SANT-like DNA-binding domain containing 3 [Source:MGI Symbol;Acc:MGI:1913915]	chr4:48539935-48561919|+	14.9119	19.2345	-0.359674	0.0627147	418.531
ENSMUSG00000020089	Ppa1	pyrophosphatase (inorganic) 1 [Source:MGI Symbol;Acc:MGI:97831]	chr10:61648552-61674168|+	11.8264	15.2269	-0.360041	0.00350213	728.145
ENSMUSG00000022587	Ly6e	lymphocyte antigen 6 complex, locus E [Source:MGI Symbol;Acc:MGI:106651]	chr15:74955051-74959905|+	10.7731	13.8865	-0.360192	0.0619969	729.895
ENSMUSG00000030270	Cpne9	copine family member IX [Source:MGI Symbol;Acc:MGI:2443052]	chr6:113282307-113305627|+	2.98236	3.8445	-0.360386	0.0242352	677.734
ENSMUSG00000029148	Nrbp1	nuclear receptor binding protein 1 [Source:MGI Symbol;Acc:MGI:2183436]	chr5:31240864-31251566|+	12.9464	16.7073	-0.360733	0.000254	1630.69
ENSMUSG00000031299	Pdha1	pyruvate dehydrogenase E1 alpha 1 [Source:MGI Symbol;Acc:MGI:97532]	chrX:160122209-160138413|-	2.79379	3.61069	-0.360878	0.0637404	285.968
ENSMUSG00000081044	AU015836	expressed sequence AU015836 [Source:MGI Symbol;Acc:MGI:2147954]	chrX:93968659-93975470|+	268.15	344.258	-0.361775	0.0196528	15991.7
ENSMUSG00000022100	Xpo7	exportin 7 [Source:MGI Symbol;Acc:MGI:1929705]	chr14:70654246-70766628|-	6.23682	8.05185	-0.362881	0.000921	1816.85
ENSMUSG00000056770	Setd3	SET domain containing 3 [Source:MGI Symbol;Acc:MGI:1289184]	chr12:108106431-108179314|-	7.32342	9.44009	-0.362923	0.00229457	880.63
ENSMUSG00000025228	Actr1a	ARP1 actin-related protein 1A, centractin alpha [Source:MGI Symbol;Acc:MGI:1858964]	chr19:46376814-46395735|-	35.342	45.8294	-0.363101	0.000829	1780.7
ENSMUSG00000021114	Atp6v1d	ATPase, H+ transporting, lysosomal V1 subunit D [Source:MGI Symbol;Acc:MGI:1921084]	chr12:78840725-78861638|-	10.7851	13.9224	-0.363971	0.0112182	1255.26
ENSMUSG00000015776	Med22	mediator complex subunit 22 [Source:MGI Symbol;Acc:MGI:98446]	chr2:26905262-26910677|-	7.58509	9.81929	-0.364199	0.0146087	552.738
ENSMUSG00000074060	Fbxw15	F-box and WD-40 domain protein 15 [Source:MGI Symbol;Acc:MGI:3505701]	chr9:109552602-109568262|-	30.9229	40.0152	-0.364617	0.037181	2098.65
ENSMUSG00000031311	Nono	non-POU-domain-containing, octamer binding protein [Source:MGI Symbol;Acc:MGI:1855692]	chrX:101429318-101448591|+	34.9688	45.1998	-0.365336	0.00927199	3481.92
ENSMUSG00000019303	Psmc3ip	proteasome (prosome, macropain) 26S subunit, ATPase 3, interacting protein [Source:MGI Symbol;Acc:MGI:1098610]	chr11:101091823-101095436|-	5.742	7.44666	-0.366266	0.0445057	421.463
ENSMUSG00000044600	Smim7	small integral membrane protein 7 [Source:MGI Symbol;Acc:MGI:1914068]	chr8:72565188-72571088|-	2.73578	3.55442	-0.366483	0.0387495	331.433
ENSMUSG00000049044	Rapgef4	Rap guanine nucleotide exchange factor (GEF) 4 [Source:MGI Symbol;Acc:MGI:1917723]	chr2:71981240-72257474|+	2.59713	3.37508	-0.36688	0.083847	332.373
ENSMUSG00000028567	Txndc12	thioredoxin domain containing 12 (endoplasmic reticulum) [Source:MGI Symbol;Acc:MGI:1913323]	chr4:108834601-108862127|+	4.91193	6.39383	-0.367012	0.0946929	244.013
ENSMUSG00000034247	Plekhm1	pleckstrin homology domain containing, family M (with RUN domain) member 1 [Source:MGI Symbol;Acc:MGI:2443207]	chr11:103364275-103412687|-	12.7901	16.6084	-0.367208	0.000641	1589.56
ENSMUSG00000062580	Timm17a	translocase of inner mitochondrial membrane 17a [Source:MGI Symbol;Acc:MGI:1343131]	chr1:135295213-135313778|-	9.23442	11.9771	-0.367342	5.42e-05	2035
ENSMUSG00000036966	Spryd3	SPRY domain containing 3 [Source:MGI Symbol;Acc:MGI:2446175]	chr15:102116528-102136234|-	7.92387	10.323	-0.367788	0.0600123	498.889
ENSMUSG00000018830	Myh11	myosin, heavy polypeptide 11, smooth muscle [Source:MGI Symbol;Acc:MGI:102643]	chr16:14194527-14291408|-	29.6696	38.6474	-0.367829	0.0357719	3416.78
ENSMUSG00000056201	Cfl1	cofilin 1, non-muscle [Source:MGI Symbol;Acc:MGI:101757]	chr19:5490455-5495201|+	41.5104	54.3452	-0.367859	0.0208517	2464.13
ENSMUSG00000051853	Arf3	ADP-ribosylation factor 3 [Source:MGI Symbol;Acc:MGI:99432]	chr15:98737621-98763214|-	79.8012	103.865	-0.36789	0.00258018	5621.36
ENSMUSG00000031622	Sin3b	transcriptional regulator, SIN3B (yeast) [Source:MGI Symbol;Acc:MGI:107158]	chr8:72723285-72758201|+	5.7154	7.42596	-0.36854	0.0103001	877.364
ENSMUSG00000071658	Gng3	guanine nucleotide binding protein (G protein), gamma 3 [Source:MGI Symbol;Acc:MGI:102704]	chr19:8836929-8839246|-	78.968	102.222	-0.368636	0.00325993	2557.79
ENSMUSG00000026248	Mrpl44	mitochondrial ribosomal protein L44 [Source:MGI Symbol;Acc:MGI:1916413]	chr1:79776018-79781445|+	5.11821	6.6759	-0.369105	0.0803733	162.845
ENSMUSG00000054003	Tdrd9	tudor domain containing 9 [Source:MGI Symbol;Acc:MGI:1921941]	chr12:111971559-112068854|+	3.29543	4.30356	-0.369966	0.0372178	419.723
ENSMUSG00000003131	Pafah1b2	platelet-activating factor acetylhydrolase, isoform 1b, subunit 2 [Source:MGI Symbol;Acc:MGI:108415]	chr9:45962859-46012690|-	1.87332	2.4349	-0.370055	0.0310149	310.648
ENSMUSG00000032998	Foxj3	forkhead box J3 [Source:MGI Symbol;Acc:MGI:2443432]	chr4:119537004-119629119|+	72.5837	94.1169	-0.370214	7.63e-06	15272.8
ENSMUSG00000031740	Mmp2	matrix metallopeptidase 2 [Source:MGI Symbol;Acc:MGI:97009]	chr8:92827291-92853420|+	6.81805	8.85788	-0.371603	0.0036714	493.77
ENSMUSG00000034773	BC030867	cDNA sequence BC030867 [Source:MGI Symbol;Acc:MGI:2387601]	chr11:102248882-102265187|+	17.4695	22.7352	-0.37162	0.00219586	1552.92
ENSMUSG00000031948	Kars	lysyl-tRNA synthetase [Source:MGI Symbol;Acc:MGI:1934754]	chr8:111993443-112011323|-	7.45817	9.68176	-0.371824	0.0118276	582.624
ENSMUSG00000067274	Rplp0	ribosomal protein, large, P0 [Source:MGI Symbol;Acc:MGI:1927636]	chr5:115559467-115563727|+	5.43459	7.10935	-0.372306	0.0652243	477.166
ENSMUSG00000063694	Cycs	cytochrome c, somatic [Source:MGI Symbol;Acc:MGI:88578]	chr6:50562563-50566538|-	3.05767	4.01078	-0.372466	0.0254677	547.237
ENSMUSG00000028792	Ak2	adenylate kinase 2 [Source:MGI Symbol;Acc:MGI:87978]	chr4:128991958-129011529|+	31.7729	41.2546	-0.372504	3.5e-05	1993.85
ENSMUSG00000073568	Arl14epl	ADP-ribosylation factor-like 14 effector protein-like [Source:MGI Symbol;Acc:MGI:2685795]	chr18:46925982-46934222|+	18.7353	24.4131	-0.373275	0.0452589	830.662
ENSMUSG00000044221	Grsf1	G-rich RNA sequence binding factor 1 [Source:MGI Symbol;Acc:MGI:106479]	chr5:88659448-88676171|-	15.2188	19.8867	-0.373837	0.0268358	1058.43
ENSMUSG00000030878	Cdr2	cerebellar degeneration-related 2 [Source:MGI Symbol;Acc:MGI:1100885]	chr7:120957036-120982312|-	23.6478	30.6554	-0.373898	0.00285336	2621.31
ENSMUSG00000031970	Dbndd1	dysbindin (dystrobrevin binding protein 1) domain containing 1 [Source:MGI Symbol;Acc:MGI:1919435]	chr8:123504718-123515463|-	3.99226	5.19666	-0.375268	0.0428396	433.875
ENSMUSG00000028655	Mfsd2a	major facilitator superfamily domain containing 2A [Source:MGI Symbol;Acc:MGI:1923824]	chr4:122946850-122961188|-	40.5991	52.8678	-0.375357	0.0039299	2283.63
ENSMUSG00000039474	Wfs1	wolframin ER transmembrane glycoprotein [Source:MGI Symbol;Acc:MGI:1328355]	chr5:36966104-36989205|-	11.963	15.5104	-0.375471	0.00863554	955.959
ENSMUSG00000005354	Txn2	thioredoxin 2 [Source:MGI Symbol;Acc:MGI:1929468]	chr15:77915047-77929006|-	7.52165	9.82061	-0.376616	0.00922626	669.396
ENSMUSG00000062939	Stat4	signal transducer and activator of transcription 4 [Source:MGI Symbol;Acc:MGI:103062]	chr1:51987148-52107189|+	6.9263	9.04727	-0.376919	0.00257211	520.422
ENSMUSG00000034336	Ina	internexin neuronal intermediate filament protein, alpha [Source:MGI Symbol;Acc:MGI:96568]	chr19:47014698-47025327|+	14.8114	19.3337	-0.377614	0.0651078	836.28
ENSMUSG00000059108	Ifitm6	interferon induced transmembrane protein 6 [Source:MGI Symbol;Acc:MGI:2686976]	chr7:141015699-141017924|-	52.0422	67.8791	-0.378744	0.00349997	954.654
ENSMUSG00000020273	Papolg	poly(A) polymerase gamma [Source:MGI Symbol;Acc:MGI:2442119]	chr11:23862646-23895253|-	20.454	26.6426	-0.378912	5.15e-06	2699.1
ENSMUSG00000020541	Tom1l1	target of myb1-like 1 (chicken) [Source:MGI Symbol;Acc:MGI:1919193]	chr11:90643465-90688366|-	3.37442	4.41117	-0.379289	0.0215045	568.852
ENSMUSG00000033022	Cdo1	cysteine dioxygenase 1, cytosolic [Source:MGI Symbol;Acc:MGI:105925]	chr18:46713205-46728342|-	263.985	344.709	-0.379334	0.000417	7906.05
ENSMUSG00000079679	Vwde	von Willebrand factor D and EGF domains [Source:MGI Symbol;Acc:MGI:2685313]	chr6:13156299-13224965|-	5.05123	6.58903	-0.37993	0.0223768	774.201
ENSMUSG00000021810	Ecd	ecdysoneless homolog (Drosophila) [Source:MGI Symbol;Acc:MGI:1917851]	chr14:20319859-20348121|-	10.9807	14.3333	-0.38026	0.00229227	719.115
ENSMUSG00000028884	Rpa2	replication protein A2 [Source:MGI Symbol;Acc:MGI:1339939]	chr4:132768332-132778752|+	1.57683	2.07297	-0.380516	0.0928345	360.816
ENSMUSG00000030166	Rad52	RAD52 homolog, DNA repair protein [Source:MGI Symbol;Acc:MGI:101949]	chr6:119902698-119922828|+	4.0354	5.27612	-0.380654	0.016155	432.234
ENSMUSG00000041930	Fam222a	family with sequence similarity 222, member A [Source:MGI Symbol;Acc:MGI:3605543]	chr5:114568016-114613220|+	8.69625	11.3791	-0.381215	0.0154737	723.014
ENSMUSG00000061032	Rrp1	ribosomal RNA processing 1 homolog (S. cerevisiae) [Source:MGI Symbol;Acc:MGI:1203500]	chr10:78400384-78413043|-	2.93698	3.85815	-0.381682	0.0651806	269.46
ENSMUSG00000038000	Acd	adrenocortical dysplasia [Source:MGI Symbol;Acc:MGI:87873]	chr8:105695860-105701102|-	11.1868	14.6878	-0.382271	0.00429197	1017.68
ENSMUSG00000030120	Mlf2	myeloid leukemia factor 2 [Source:MGI Symbol;Acc:MGI:1353554]	chr6:124931386-124937238|+	16.1931	21.1957	-0.383673	0.0265624	1247.41
ENSMUSG00000061374	Fiz1	Flt3 interacting zinc finger protein 1 [Source:MGI Symbol;Acc:MGI:1344336]	chr7:5007059-5014697|-	11.701	15.2884	-0.383834	0.00516796	778.738
ENSMUSG00000018849	Wwc1	WW, C2 and coiled-coil domain containing 1 [Source:MGI Symbol;Acc:MGI:2388637]	chr11:35838400-35980527|-	3.52714	4.63531	-0.383884	0.0327334	402.602
ENSMUSG00000022982	Sod1	superoxide dismutase 1, soluble [Source:MGI Symbol;Acc:MGI:98351]	chr16:90220742-90226322|+	355.291	463.188	-0.384596	0.00388437	7378.22
ENSMUSG00000041757	Plekha6	pleckstrin homology domain containing, family A member 6 [Source:MGI Symbol;Acc:MGI:2388662]	chr1:133164210-133303435|+	2.55269	3.36063	-0.385027	0.0197551	739.111
ENSMUSG00000025616	Usp16	ubiquitin specific peptidase 16 [Source:MGI Symbol;Acc:MGI:1921362]	chr16:87454703-87483517|+	26.508	35.0454	-0.38566	0.0178787	4732.26
ENSMUSG00000022412	Mief1	mitochondrial elongation factor 1 [Source:MGI Symbol;Acc:MGI:2146020]	chr15:80234080-80253366|+	7.19467	9.43639	-0.386425	0.000838	755.493
ENSMUSG00000030801	Kat8	K(lysine) acetyltransferase 8 [Source:MGI Symbol;Acc:MGI:1915023]	chr7:127912516-127925837|+	4.23548	5.55507	-0.386982	0.0121124	806.662
ENSMUSG00000040462	Os9	amplified in osteosarcoma [Source:MGI Symbol;Acc:MGI:1924301]	chr10:127095650-127121131|-	17.8129	23.4475	-0.387003	0.000928	1158.63
ENSMUSG00000029032	Arhgef16	Rho guanine nucleotide exchange factor (GEF) 16 [Source:MGI Symbol;Acc:MGI:2446219]	chr4:154278486-154301676|-	2.10819	2.77153	-0.387035	0.0101217	552.474
ENSMUSG00000030706	Mrpl48	mitochondrial ribosomal protein L48 [Source:MGI Symbol;Acc:MGI:1289321]	chr7:100545751-100608301|-	3.35591	4.42365	-0.387265	0.0155236	944.603
ENSMUSG00000020456	Ogdh	oxoglutarate (alpha-ketoglutarate) dehydrogenase (lipoamide) [Source:MGI Symbol;Acc:MGI:1098267]	chr11:6291633-6356642|+	7.60555	9.97094	-0.387589	0.00309829	967.653
ENSMUSG00000027331	Knstrn	kinetochore-localized astrin/SPAG5 binding [Source:MGI Symbol;Acc:MGI:1289298]	chr2:118814003-118853957|+	22.7336	29.8557	-0.389366	9.19e-06	2236.37
ENSMUSG00000051403	Ppp1r37	protein phosphatase 1, regulatory subunit 37 [Source:MGI Symbol;Acc:MGI:2687042]	chr7:19530800-19563076|-	3.80903	5.01313	-0.38944	0.0511365	303.534
ENSMUSG00000037742	Eef1a1	eukaryotic translation elongation factor 1 alpha 1 [Source:MGI Symbol;Acc:MGI:1096881]	chr9:78478449-78489151|-	75.8163	99.6036	-0.389695	0.0004	4952.22
ENSMUSG00000094992	Fbxw25	F-box and WD-40 domain protein 25 [Source:MGI Symbol;Acc:MGI:3588266]	chr9:109645122-109664652|-	4.26631	5.62886	-0.389784	0.0722676	247.655
ENSMUSG00000035933	Cog5	component of oligomeric golgi complex 5 [Source:MGI Symbol;Acc:MGI:2145130]	chr12:31654869-31937630|+	1.6623	2.18442	-0.389905	0.016898	255.93
ENSMUSG00000038690	Atp5j2	ATP synthase, H+ transporting, mitochondrial F0 complex, subunit F2 [Source:MGI Symbol;Acc:MGI:1927558]	chr5:145183698-145192062|-	1.66809	2.21984	-0.390687	0.0675469	291.928
ENSMUSG00000079562	Maea	macrophage erythroblast attacher [Source:MGI Symbol;Acc:MGI:1891748]	chr5:33335509-33373296|+	35.2171	46.3707	-0.390925	5.02e-07	2193.17
ENSMUSG00000028559	Osbpl9	oxysterol binding protein-like 9 [Source:MGI Symbol;Acc:MGI:1923784]	chr4:109061145-109202272|-	14.7896	19.5346	-0.391085	0.000209	3306.07
ENSMUSG00000007777	0610009B22Rik	RIKEN cDNA 0610009B22 gene [Source:MGI Symbol;Acc:MGI:1913300]	chr11:51685386-51688874|-	50.6115	66.3986	-0.391406	0.00291954	1474.41
ENSMUSG00000056752	Dnah9	dynein, axonemal, heavy chain 9 [Source:MGI Symbol;Acc:MGI:1289279]	chr11:65831282-66168551|-	1.59694	2.10844	-0.391488	0.00991532	512.598
ENSMUSG00000053199	Arhgap20	Rho GTPase activating protein 20 [Source:MGI Symbol;Acc:MGI:2445175]	chr9:51765337-51853856|+	4.30005	5.69081	-0.391938	0.00132261	935.507
ENSMUSG00000026558	Uck2	uridine-cytidine kinase 2 [Source:MGI Symbol;Acc:MGI:1931744]	chr1:167222883-167285320|-	8.56897	11.3449	-0.392676	0.00333824	1306.53
ENSMUSG00000055762	Eef1d	eukaryotic translation elongation factor 1 delta (guanine nucleotide exchange protein) [Source:MGI Symbol;Acc:MGI:1913906]	chr15:75894796-75909556|-	2.52804	3.35011	-0.393038	0.0353921	1017.98
ENSMUSG00000016520	Lnx2	ligand of numb-protein X 2 [Source:MGI Symbol;Acc:MGI:2155959]	chr5:147016655-147076586|-	29.1758	38.4697	-0.393113	0.00903845	4603.38
ENSMUSG00000091060	7420461P10Rik	RIKEN cDNA 7420461P10 gene [Source:MGI Symbol;Acc:MGI:3642786]	chr1:162647193-162658219|-	8.41302	11.1223	-0.39335	0.0324498	340.581
ENSMUSG00000021686	Ap3b1	adaptor-related protein complex 3, beta 1 subunit [Source:MGI Symbol;Acc:MGI:1333879]	chr13:94358960-94566317|+	24.9117	32.9363	-0.393355	0.00838419	2531.75
ENSMUSG00000006191	Cdkal1	CDK5 regulatory subunit associated protein 1-like 1 [Source:MGI Symbol;Acc:MGI:1921765]	chr13:29191746-29855674|-	1.12623	1.48651	-0.393399	0.0456727	263.534
ENSMUSG00000020349	Ppp2ca	protein phosphatase 2 (formerly 2A), catalytic subunit, alpha isoform [Source:MGI Symbol;Acc:MGI:1321159]	chr11:52098681-52127778|+	3.22746	4.25955	-0.393569	0.0179996	733.855
ENSMUSG00000037979	Ccdc92	coiled-coil domain containing 92 [Source:MGI Symbol;Acc:MGI:106485]	chr5:124834418-124862424|-	44.298	58.4821	-0.393919	0.000715	3040.71
ENSMUSG00000000631	Myo18a	myosin XVIIIA [Source:MGI Symbol;Acc:MGI:2667185]	chr11:77763246-77865980|+	3.73924	4.95871	-0.394443	0.0222883	1193.5
ENSMUSG00000025519	Tktl2	transketolase-like 2 [Source:MGI Symbol;Acc:MGI:1921669]	chr8:66511756-66518335|+	4.63291	6.15757	-0.39496	0.0350358	550.611
ENSMUSG00000033294	Noc4l	NOC4 like [Source:MGI Symbol;Acc:MGI:2140843]	chr5:110648418-110653417|-	12.9045	17.0373	-0.395968	0.00345603	1349.77
ENSMUSG00000079588	Tmem182	transmembrane protein 182 [Source:MGI Symbol;Acc:MGI:1923725]	chr1:40805601-40856887|+	5.35823	7.0936	-0.396124	0.0348796	350.638
ENSMUSG00000026457	Adipor1	adiponectin receptor 1 [Source:MGI Symbol;Acc:MGI:1919924]	chr1:134415378-134433351|+	2.89944	3.83879	-0.39613	0.0392182	420.846
ENSMUSG00000034083	Ccdc174	coiled-coil domain containing 174 [Source:MGI Symbol;Acc:MGI:2444652]	chr6:91878053-91899843|+	5.04055	6.66172	-0.396342	0.00245604	1001.45
ENSMUSG00000041638	Gcn1l1	GCN1 general control of amino-acid synthesis 1-like 1 (yeast) [Source:MGI Symbol;Acc:MGI:2444248]	chr5:115565254-115622654|+	1.29725	1.71159	-0.3967	0.016155	1038.79
ENSMUSG00000039050	Osbpl2	oxysterol binding protein-like 2 [Source:MGI Symbol;Acc:MGI:2442832]	chr2:180119306-180162680|+	5.30783	7.01041	-0.39673	0.00128961	536.25
ENSMUSG00000027671	Actl6a	actin-like 6A [Source:MGI Symbol;Acc:MGI:1861453]	chr3:32706298-32726973|+	3.58141	4.74798	-0.397933	0.0392182	275.664
ENSMUSG00000083012	Fam220a	family with sequence similarity 220, member A [Source:MGI Symbol;Acc:MGI:1914488]	chr5:143548706-143564531|+	34.8721	46.1975	-0.398365	0.000288	2900.73
ENSMUSG00000039968	Rsbn1l	round spermatid basic protein 1-like [Source:MGI Symbol;Acc:MGI:3036237]	chr5:20893028-20956398|-	0.461156	0.613757	-0.39843	0.0886652	122.361
ENSMUSG00000001794	Capns1	calpain, small subunit 1 [Source:MGI Symbol;Acc:MGI:88266]	chr7:30186936-30198811|-	24.4796	32.3877	-0.398854	0.00349339	1492.06
ENSMUSG00000020265	Sumo3	small ubiquitin-like modifier 3 [Source:MGI Symbol;Acc:MGI:1336201]	chr10:77606097-77618331|+	9.84749	13.0223	-0.398955	0.000728	958.901
ENSMUSG00000028434	Epb41l4b	erythrocyte membrane protein band 4.1 like 4b [Source:MGI Symbol;Acc:MGI:1859149]	chr4:56991972-57143437|-	5.06553	6.68847	-0.398987	0.00341052	938.369
ENSMUSG00000001517	Foxm1	forkhead box M1 [Source:MGI Symbol;Acc:MGI:1347487]	chr6:128362967-128376146|+	17.6623	23.4893	-0.399866	0.00180266	2997.18
ENSMUSG00000015757	Ppil4	peptidylprolyl isomerase (cyclophilin)-like 4 [Source:MGI Symbol;Acc:MGI:1914668]	chr10:7792891-7823135|+	8.67582	11.4825	-0.400188	0.00067	1098.71
ENSMUSG00000037426	Depdc5	DEP domain containing 5 [Source:MGI Symbol;Acc:MGI:2141101]	chr5:32863701-32994236|+	1.17714	1.56549	-0.400418	0.0363135	241.623
ENSMUSG00000020198	Ap3d1	adaptor-related protein complex 3, delta 1 subunit [Source:MGI Symbol;Acc:MGI:107734]	chr10:80706956-80742264|-	3.10904	4.12028	-0.401104	0.000758	606.795
ENSMUSG00000019173	Rab5c	RAB5C, member RAS oncogene family [Source:MGI Symbol;Acc:MGI:105306]	chr11:100715009-100738215|-	35.6503	47.1158	-0.401512	0.000196	1632.78
ENSMUSG00000054051	Ercc6	excision repair cross-complementing rodent repair deficiency, complementation group 6 [Source:MGI Symbol;Acc:MGI:1100494]	chr14:32513521-32580989|+	4.13776	5.52107	-0.401818	0.0178787	729.438
ENSMUSG00000037563	Rps16	ribosomal protein S16 [Source:MGI Symbol;Acc:MGI:98118]	chr7:28350652-28353155|+	8.82853	11.7758	-0.402132	0.0212641	338.666
ENSMUSG00000011257	Pabpc4	poly(A) binding protein, cytoplasmic 4 [Source:MGI Symbol;Acc:MGI:2385206]	chr4:123262351-123298925|+	19.308	25.6448	-0.402312	0.00499388	1753.88
ENSMUSG00000024376	Epb41l4a	erythrocyte membrane protein band 4.1 like 4a [Source:MGI Symbol;Acc:MGI:103007]	chr18:33796327-34007206|-	8.50858	11.2896	-0.402684	0.00316723	644.964
ENSMUSG00000029204	Rhoh	ras homolog family member H [Source:MGI Symbol;Acc:MGI:1921984]	chr5:65861213-65896700|+	1.31608	1.75098	-0.402716	0.00372677	512.964
ENSMUSG00000069678	Pcgf1	polycomb group ring finger 1 [Source:MGI Symbol;Acc:MGI:1917087]	chr6:83077869-83080855|+	129.35	171.292	-0.402798	0.000224	4348.42
ENSMUSG00000020457	Drg1	developmentally regulated GTP binding protein 1 [Source:MGI Symbol;Acc:MGI:1343297]	chr11:3187360-3266415|-	2.43679	3.23702	-0.403108	0.077857	217.826
ENSMUSG00000061360	Phf5a	PHD finger protein 5A [Source:MGI Symbol;Acc:MGI:2156864]	chr15:81865319-81871911|-	45.5549	60.7491	-0.403837	0.00135688	850.392
ENSMUSG00000030763	Lcmt1	leucine carboxyl methyltransferase 1 [Source:MGI Symbol;Acc:MGI:1353593]	chr7:123369784-123430358|+	3.81884	5.09374	-0.404082	0.0265707	302.009
ENSMUSG00000021273	Fdft1	farnesyl diphosphate farnesyl transferase 1 [Source:MGI Symbol;Acc:MGI:102706]	chr14:63145153-63177793|-	81.0358	107.747	-0.404605	4.77e-07	8433.82
ENSMUSG00000020453	Patz1	POZ (BTB) and AT hook containing zinc finger 1 [Source:MGI Symbol;Acc:MGI:1891832]	chr11:3288874-3309083|+	5.10471	6.79576	-0.405222	0.0148344	580.404
ENSMUSG00000057335	Cep170	centrosomal protein 170 [Source:MGI Symbol;Acc:MGI:1918348]	chr1:176733653-176814067|-	1.72062	2.29197	-0.405347	0.000139	686.033
ENSMUSG00000056076	Eif3b	eukaryotic translation initiation factor 3, subunit B [Source:MGI Symbol;Acc:MGI:106478]	chr5:140419328-140443360|+	2.37256	3.16355	-0.405915	0.058056	287.863
ENSMUSG00000024425	Ndfip1	Nedd4 family interacting protein 1 [Source:MGI Symbol;Acc:MGI:1929601]	chr18:38418975-38464399|+	6.9857	9.43651	-0.406286	0.0802472	582.499
ENSMUSG00000026421	Csrp1	cysteine and glycine-rich protein 1 [Source:MGI Symbol;Acc:MGI:88549]	chr1:135720061-135752232|+	7.6136	10.1545	-0.406318	0.0265753	271.804
ENSMUSG00000024913	Lrp5	low density lipoprotein receptor-related protein 5 [Source:MGI Symbol;Acc:MGI:1278315]	chr19:3584828-3686564|-	14.8483	19.8431	-0.406449	0.00183627	3252.85
ENSMUSG00000032870	Smap2	small ArfGAP 2 [Source:MGI Symbol;Acc:MGI:1917030]	chr4:120968317-121017247|-	10.0248	13.3648	-0.406567	0.00501637	646.381
ENSMUSG00000036057	Ptpn23	protein tyrosine phosphatase, non-receptor type 23 [Source:MGI Symbol;Acc:MGI:2144837]	chr9:110385082-110408213|-	6.18595	8.24604	-0.406959	0.000378	787.305
ENSMUSG00000031105	Slc25a14	solute carrier family 25 (mitochondrial carrier, brain), member 14 [Source:MGI Symbol;Acc:MGI:1330823]	chrX:48623413-48662294|+	6.33439	8.48301	-0.40737	0.0233523	292.19
ENSMUSG00000036371	Serbp1	serpine1 mRNA binding protein 1 [Source:MGI Symbol;Acc:MGI:1914120]	chr6:67238176-67297736|+	9.97077	13.3075	-0.407674	8.83e-05	4180.34
ENSMUSG00000010936	Vac14	Vac14 homolog (S. cerevisiae) [Source:MGI Symbol;Acc:MGI:2157980]	chr8:110618585-110720398|+	11.7285	15.5718	-0.408272	9.19e-06	1690.52
ENSMUSG00000021218	Gdi2	guanosine diphosphate (GDP) dissociation inhibitor 2 [Source:MGI Symbol;Acc:MGI:99845]	chr13:3538063-3567871|+	12.2069	16.2401	-0.4087	3.05e-05	3041.25
ENSMUSG00000029644	Pdx1	pancreatic and duodenal homeobox 1 [Source:MGI Symbol;Acc:MGI:102851]	chr5:147269959-147275848|+	3.20848	4.29744	-0.408931	0.0972834	207.538
ENSMUSG00000050555	Hyls1	HYLS1, centriolar and ciliogenesis associated [Source:MGI Symbol;Acc:MGI:1924082]	chr9:35560820-35570398|-	5.86287	7.85051	-0.408935	0.0213677	743.141
ENSMUSG00000005881	Ergic3	ERGIC and golgi 3 [Source:MGI Symbol;Acc:MGI:1913616]	chr2:156008045-156018279|+	9.31656	12.4349	-0.409456	0.00169821	741.575
ENSMUSG00000032398	Snapc5	small nuclear RNA activating complex, polypeptide 5 [Source:MGI Symbol;Acc:MGI:1914282]	chr9:64179274-64183132|+	4.97735	6.67375	-0.409652	0.0748403	204.766
ENSMUSG00000022487	Gtsf1	gametocyte specific factor 1 [Source:MGI Symbol;Acc:MGI:1921424]	chr15:103402405-103430470|-	13.3242	17.7689	-0.410669	0.00294553	1420.63
ENSMUSG00000057219	Armc7	armadillo repeat containing 7 [Source:MGI Symbol;Acc:MGI:2679719]	chr11:115475667-115490467|+	1.59163	2.13866	-0.411352	0.0626914	199.424
ENSMUSG00000056050	Mia3	melanoma inhibitory activity 3 [Source:MGI Symbol;Acc:MGI:2443183]	chr1:183326725-183369553|-	10.3572	13.8111	-0.411622	1.96e-06	1201.12
ENSMUSG00000026427	Eif2d	eukaryotic translation initiation factor 2D [Source:MGI Symbol;Acc:MGI:109342]	chr1:131153181-131187658|+	1.83916	2.45913	-0.411839	0.00565591	368.043
ENSMUSG00000031471	Defb8	defensin beta 8 [Source:MGI Symbol;Acc:MGI:2654206]	chr8:19445769-19447606|-	143.088	190.753	-0.411874	0.0266029	759.025
ENSMUSG00000025409	Mbd6	methyl-CpG binding domain protein 6 [Source:MGI Symbol;Acc:MGI:106378]	chr10:127281956-127289018|-	4.55438	6.17343	-0.411933	0.0948131	447.443
ENSMUSG00000027544	Nfatc2	nuclear factor of activated T cells, cytoplasmic, calcineurin dependent 2 [Source:MGI Symbol;Acc:MGI:102463]	chr2:168476410-168601657|-	0.589669	0.792728	-0.412997	0.0651806	179.054
ENSMUSG00000060512	0610040J01Rik	RIKEN cDNA 0610040J01 gene [Source:MGI Symbol;Acc:MGI:1923511]	chr5:63812363-63899625|+	2.84776	3.80979	-0.413085	0.0564357	157.818
ENSMUSG00000030421	Uri1	URI1, prefoldin-like chaperone [Source:MGI Symbol;Acc:MGI:1342294]	chr7:37959992-38023551|-	9.99993	13.3536	-0.41321	0.000309	799.342
ENSMUSG00000026972	Arrdc1	arrestin domain containing 1 [Source:MGI Symbol;Acc:MGI:2446136]	chr2:24925352-24935252|-	14.2591	19.026	-0.413385	0.00384854	1080.97
ENSMUSG00000023923	Tbc1d5	TBC1 domain family, member 5 [Source:MGI Symbol;Acc:MGI:1919488]	chr17:50733127-51179349|-	5.39231	7.21291	-0.413459	0.00223856	654.8
ENSMUSG00000022443	Myh9	myosin, heavy polypeptide 9, non-muscle [Source:MGI Symbol;Acc:MGI:107717]	chr15:77760587-77842175|-	3.80793	5.10929	-0.41416	0.00271843	1028.56
ENSMUSG00000000056	Narf	nuclear prelamin A recognition factor [Source:MGI Symbol;Acc:MGI:1914858]	chr11:121237253-121255856|+	4.36863	5.87211	-0.414932	0.0196966	371.97
ENSMUSG00000028433	Ubap2	ubiquitin-associated protein 2 [Source:MGI Symbol;Acc:MGI:1916176]	chr4:41194313-41275144|-	96.0744	129.624	-0.41511	0.00585673	8995.17
ENSMUSG00000031879	Fam96b	family with sequence similarity 96, member B [Source:MGI Symbol;Acc:MGI:1915773]	chr8:104639838-104641965|-	36.6073	49.3821	-0.415232	0.0507442	519.679
ENSMUSG00000032540	Abhd5	abhydrolase domain containing 5 [Source:MGI Symbol;Acc:MGI:1914719]	chr9:122351608-122381524|+	3.49314	4.67253	-0.415901	0.00016	527.333
ENSMUSG00000005204	Senp3	SUMO/sentrin specific peptidase 3 [Source:MGI Symbol;Acc:MGI:2158736]	chr11:69673115-69682084|-	3.38549	4.54694	-0.415962	0.0203042	260.703
ENSMUSG00000040209	Zfp704	zinc finger protein 704 [Source:MGI Symbol;Acc:MGI:2180715]	chr3:9427020-9610085|-	0.491977	0.661799	-0.415982	0.0696191	166.95
ENSMUSG00000027333	Smox	spermine oxidase [Source:MGI Symbol;Acc:MGI:2445356]	chr2:131491496-131525922|+	2.66402	3.58448	-0.416087	0.0571079	310.272
ENSMUSG00000020847	Rph3al	rabphilin 3A-like (without C2 domains) [Source:MGI Symbol;Acc:MGI:1923492]	chr11:75830999-75938429|-	11.8943	15.9028	-0.41635	9.97e-05	1163.8
ENSMUSG00000040282	BC052040	cDNA sequence BC052040 [Source:MGI Symbol;Acc:MGI:3026886]	chr2:115581716-115778768|+	5.79685	7.77171	-0.416502	0.0086499	489.729
ENSMUSG00000038828	Tmem214	transmembrane protein 214 [Source:MGI Symbol;Acc:MGI:1916046]	chr5:30868012-30879180|+	2.42954	3.26039	-0.416883	0.00246546	588.287
ENSMUSG00000007987	Ift22	intraflagellar transport 22 [Source:MGI Symbol;Acc:MGI:1914536]	chr5:136908150-136915404|+	4.8662	6.56092	-0.417116	0.0522257	395.544
ENSMUSG00000022871	Fetub	fetuin beta [Source:MGI Symbol;Acc:MGI:1890221]	chr16:22918382-22939766|+	23.0822	31.1688	-0.417833	0.0243173	987.944
ENSMUSG00000021408	Ripk1	receptor (TNFRSF)-interacting serine-threonine kinase 1 [Source:MGI Symbol;Acc:MGI:108212]	chr13:34002363-34037147|+	3.494	4.71751	-0.417907	0.0175463	574.092
ENSMUSG00000004565	Pnpla6	patatin-like phospholipase domain containing 6 [Source:MGI Symbol;Acc:MGI:1354723]	chr8:3515384-3544267|+	0.517954	0.702445	-0.418536	0.0403679	166.279
ENSMUSG00000037406	Htra4	HtrA serine peptidase 4 [Source:MGI Symbol;Acc:MGI:3036260]	chr8:25024929-25038962|-	9.85631	13.2365	-0.418638	0.00349997	552.766
ENSMUSG00000032553	Srprb	signal recognition particle receptor, B subunit [Source:MGI Symbol;Acc:MGI:102964]	chr9:103188032-103202137|-	2.2537	3.02764	-0.420168	0.00941437	530.002
ENSMUSG00000045435	Tmem60	transmembrane protein 60 [Source:MGI Symbol;Acc:MGI:2673965]	chr5:20882191-20886870|+	35.2343	47.1727	-0.420431	0.000317	2410.9
ENSMUSG00000028555	Ttc39a	tetratricopeptide repeat domain 39A [Source:MGI Symbol;Acc:MGI:2444350]	chr4:109406623-109444745|+	2.12325	2.87303	-0.421145	0.0419124	209.768
ENSMUSG00000040128	Pnrc1	proline-rich nuclear receptor coactivator 1 [Source:MGI Symbol;Acc:MGI:1917838]	chr4:33245423-33290163|-	46.3233	62.099	-0.421261	0.00359924	1789.24
ENSMUSG00000018377	Vezf1	vascular endothelial zinc finger 1 [Source:MGI Symbol;Acc:MGI:1313291]	chr11:88068279-88084729|+	17.0832	23.0367	-0.421803	0.00435309	1759.78
ENSMUSG00000014195	Dnajc7	DnaJ heat shock protein family (Hsp40) member C7 [Source:MGI Symbol;Acc:MGI:1928373]	chr11:100582818-100620168|-	7.94254	10.734	-0.422044	0.00892699	951.547
ENSMUSG00000044912	Syt16	synaptotagmin XVI [Source:MGI Symbol;Acc:MGI:2673872]	chr12:73997661-74273267|+	3.88572	5.24142	-0.423275	0.00137372	871.057
ENSMUSG00000020330	Hmmr	hyaluronan mediated motility receptor (RHAMM) [Source:MGI Symbol;Acc:MGI:104667]	chr11:40701395-40733422|-	2.24886	3.04049	-0.423355	0.0322543	256.109
ENSMUSG00000002608	Ccdc97	coiled-coil domain containing 97 [Source:MGI Symbol;Acc:MGI:1196455]	chr7:25711106-25719088|-	9.97091	13.524	-0.423563	0.0352097	791.291
ENSMUSG00000047459	Dynlrb1	dynein light chain roadblock-type 1 [Source:MGI Symbol;Acc:MGI:1914318]	chr2:155236533-155250277|+	16.7635	22.6287	-0.423912	0.00282652	753.184
ENSMUSG00000034341	Wbp2	WW domain binding protein 2 [Source:MGI Symbol;Acc:MGI:104709]	chr11:116078573-116086995|-	5.92872	8.02867	-0.424136	0.00946672	434.835
ENSMUSG00000030795	Fus	fused in sarcoma [Source:MGI Symbol;Acc:MGI:1353633]	chr7:127967457-127985701|+	5.90225	7.94618	-0.42465	0.00032	1515.32
ENSMUSG00000015023	Ddx19a	DEAD (Asp-Glu-Ala-Asp) box polypeptide 19a [Source:MGI Symbol;Acc:MGI:99526]	chr8:110974996-110997800|-	95.8122	128.838	-0.424968	1.41e-09	6027.16
ENSMUSG00000047547	Cltb	clathrin, light polypeptide (Lcb) [Source:MGI Symbol;Acc:MGI:1921575]	chr13:54592401-54611344|-	5.29866	7.15793	-0.425331	0.00752814	790.18
ENSMUSG00000019923	Zwint	ZW10 interactor [Source:MGI Symbol;Acc:MGI:1289227]	chr10:72654845-72674964|+	4.28562	5.79236	-0.425702	0.0046792	450.135
ENSMUSG00000020549	Elac2	elaC ribonuclease Z 2 [Source:MGI Symbol;Acc:MGI:1890496]	chr11:64979038-65002069|+	8.04658	10.8948	-0.425877	0.00708221	711.978
ENSMUSG00000021577	Sdha	succinate dehydrogenase complex, subunit A, flavoprotein (Fp) [Source:MGI Symbol;Acc:MGI:1914195]	chr13:74322254-74350280|-	22.1879	29.9825	-0.426374	1.48e-05	1755.97
ENSMUSG00000021591	Glrx	glutaredoxin [Source:MGI Symbol;Acc:MGI:2135625]	chr13:75839868-75850154|+	16.9949	22.7472	-0.42658	0.017582	5382.58
ENSMUSG00000029918	Mrps33	mitochondrial ribosomal protein S33 [Source:MGI Symbol;Acc:MGI:1338046]	chr6:39801804-39810988|-	30.396	40.912	-0.426698	0.00163321	1571.47
ENSMUSG00000001289	Pfdn5	prefoldin 5 [Source:MGI Symbol;Acc:MGI:1928753]	chr15:102326116-102331873|+	12.1355	16.4758	-0.427639	0.00266132	719.684
ENSMUSG00000025081	Tdrd1	tudor domain containing 1 [Source:MGI Symbol;Acc:MGI:1933218]	chr19:56826209-56870012|+	76.658	103.371	-0.427925	1.34e-07	15322
ENSMUSG00000005899	Smpd4	sphingomyelin phosphodiesterase 4 [Source:MGI Symbol;Acc:MGI:1924876]	chr16:17619354-17644828|+	2.32007	3.13235	-0.427952	0.00585405	561.522
ENSMUSG00000032059	Alg9	asparagine-linked glycosylation 9 (alpha 1,2 mannosyltransferase) [Source:MGI Symbol;Acc:MGI:1924753]	chr9:50775019-50843542|+	1.63201	2.21817	-0.428476	0.0326956	278.851
ENSMUSG00000052212	Cd177	CD177 antigen [Source:MGI Symbol;Acc:MGI:1916141]	chr7:24743983-24760311|-	11.4167	15.4156	-0.428563	0.00337946	1305.96
ENSMUSG00000028274	Rngtt	RNA guanylyltransferase and 5'-phosphatase [Source:MGI Symbol;Acc:MGI:1329041]	chr4:33310311-33502614|+	1.60816	2.18115	-0.428779	0.0224848	236.576
ENSMUSG00000032388	Spg21	SPG21, maspardin [Source:MGI Symbol;Acc:MGI:106403]	chr9:65460947-65488470|+	2.41335	3.27684	-0.429774	0.0164194	162.136
ENSMUSG00000019846	Lama4	laminin, alpha 4 [Source:MGI Symbol;Acc:MGI:109321]	chr10:38965515-39110188|+	1.16693	1.58453	-0.429869	0.025486	347.182
ENSMUSG00000038274	Fau	Finkel-Biskis-Reilly murine sarcoma virus (FBR-MuSV) ubiquitously expressed (fox derived) [Source:MGI Symbol;Acc:MGI:102547]	chr19:6057888-6059524|+	5.17589	7.05349	-0.430024	0.0469654	350.007
ENSMUSG00000014503	Pkd2l2	polycystic kidney disease 2-like 2 [Source:MGI Symbol;Acc:MGI:1858231]	chr18:34409423-34442789|+	231.941	314.068	-0.430115	5.02e-07	12375.2
ENSMUSG00000030314	Atg7	autophagy related 7 [Source:MGI Symbol;Acc:MGI:1921494]	chr6:114643097-114860614|+	1.35892	1.85217	-0.430783	0.0363135	245.064
ENSMUSG00000038020	Rapgefl1	Rap guanine nucleotide exchange factor (GEF)-like 1 [Source:MGI Symbol;Acc:MGI:3611446]	chr11:98836785-98853697|+	7.04815	9.65103	-0.431795	0.0494149	1074.15
ENSMUSG00000041777	Cir1	corepressor interacting with RBPJ, 1 [Source:MGI Symbol;Acc:MGI:1914185]	chr2:73283105-73312701|-	21.5358	29.1745	-0.431798	0.00339552	1191.57
ENSMUSG00000024474	Ik	IK cytokine [Source:MGI Symbol;Acc:MGI:1345142]	chr18:36744656-36757639|+	106.047	143.888	-0.431998	0.00618369	4345.57
ENSMUSG00000026029	Casp8	caspase 8 [Source:MGI Symbol;Acc:MGI:1261423]	chr1:58795374-58847503|+	12.2195	16.6125	-0.43222	0.00450531	737.861
ENSMUSG00000028063	Lmna	lamin A [Source:MGI Symbol;Acc:MGI:96794]	chr3:88480147-88509956|-	2.25191	3.05895	-0.432294	0.0297929	451.265
ENSMUSG00000039842	Mcph1	microcephaly, primary autosomal recessive 1 [Source:MGI Symbol;Acc:MGI:2443308]	chr8:18595131-18803189|+	25.369	34.244	-0.432312	0.00209202	4421.27
ENSMUSG00000029062	Cdk11b	cyclin-dependent kinase 11B [Source:MGI Symbol;Acc:MGI:88353]	chr4:155624854-155649938|+	30.1781	41.1972	-0.432433	0.00354576	2629.01
[truncated: 673 more rows]
